# Supplementary material for: Respiratory long COVID in aged hamsters features impaired lung function post-exercise with bronchiolization and fibrosis
Source: Nat Commun. 2025 Feb 28;16:2080. doi: 10.1038/s41467-025-57267-x (PMC11871369; doi:10.1038/s41467-025-57267-x)
Supplement: Supplementary file 3 — Supplementary Data 1 [file 41467_2025_57267_MOESM3_ESM.xlsx]

## Sheet: Total clinical score 
Supplementary File "Clinical Data"
Total score
Score 1
Score 2
Score 3
Score 4
animal ID	maximum score (1-21 dpi)	group	0 dpi	1 dpi	2 dpi	3 dpi	4 dpi	5 dpi	6 dpi	7 dpi	8 dpi	9 dpi	10 dpi	11 dpi	12 dpi	13 dpi	14 dpi	15 dpi	16 dpi	17 dpi	18 dpi	19 dpi	20 dpi	21 dpi	28 dpi	35 dpi	42 dpi	49 dpi	56 dpi	63 dpi	70 dpi	77 dpi	84 dpi	91 dpi	98 dpi	105 dpi	112 dpi
5		5	0	0	0	0	0	0	0	0	0	0	0	0	0	0	0	0	0	0	0	0	0	0	0	0	0	0	0	0	0	0	0	0	1	1	1
6		5	0	0	0	0	0	0	0	0	0	0	0	0	0	0	0	0	0	0	0	0	0	0	0	0	0	0	0	0	0	1	1	1	1	1	1
7		5	0	0	0	0	0	0	0	0	0	0	0	0	0	0	0	0	0	0	0	0	0	0	0	0	0	0	0	1	0	1	1	1	1	1	1
8		5	0	0	0	0	0	0	0	0	0	0	0	0	0	0	0	0	0	0	0	0	0	0	0	0	0	0	0	0	0	0	0	1	1	1	1
9		5	0	0	0	0	0	0	0	0	0	0	0	0	0	0	0	0	0	0	0	0	0	0	0	0	0	0	0	1	0	0	0	0	0	0	0
10		5	0	0	0	0	0	0	0	0	0	0	0	0	0	0	0	0	0	0	0	0	0	0	0	0	0	0	0	1	1	0	0	1	1	1	1
11		5	0	0	0	0	0	0	0	0	0	0	0	0	0	0	0	0	0	0	0	0	0	0	0	0	0	0	0	0	0	1	0	0	0	1	1
12		5	0	0	0	0	0	0	0	0	0	0	0	0	0	0	0	0	0	0	0	0	0	0	0	0	0	0	0	0	1	1	1	1	1	1	1
21		5	0	0	0	0
22		5	0	0	0	0
23		5	0	0	0	0
24		5	0	0	0	0
29		5	0	0	0	0	0	0	0
30		5	0	0	0	0	0	0	0
31		5	0	0	0	0	0	0	0
32		5	0	0	0	0	0	0	0
33		5	0	0	0	0	0	0	0
34		5	0	0	0	0	0	0	0
35		5	0	0	0	0	0	0	0
36		5	0	0	0	0	0	0	0
45		5	0	0	0	0	0	0	0	0	0	0	0	0	0	0	0
46		5	0	0	0	0	0	0	0	0	0	0	0	0	0	0	0
47		5	0	0	0	0	0	0	0	0	0	0	0	0	0	0	0
48		5	0	0	0	0	0	0	0	0	0	0	0	0	0	0	0
49		5	0	0	0	0	0	0	0	0	0	0	0	0	0	0	0
50		5	0	0	0	0	0	0	0	0	0	0	0	0	0	0	0
51	1	5	0	0	0	0	0	0	1	1	1	1	1	1	1	1	1
52	1	5	0	0	0	0	0	0	0	0	0	0	0	0	0	0	1
61		5	0	0
62		5	0	0
63		5	0	0
64		5	0	0
65		5	0	0
66		5	0	0
67		5	0	0
68		5	0	0
77		5	0	0	0	0	0	0	0	0	0	0	0	0	0	0	0	0	0	0	0	0	0	0	0	0	0	1	0
78	1	5	0	0	0	0	0	0	0	0	1	0	0	0	0	0	0	0	0	0	0	0	0	0	0	0	0	0	1
79	1	5	0	0	0	0	0	0	0	0	0	0	0	0	0	0	0	0	0	0	0	0	0	0	0	1	0	1	1
80		5	0	0	0	0	0	0	0	0	0	0	0	0	0	0	0	0	0	0	0	0	0	0	0	0	0	0	0
81	1	5	0	0	0	0	0	0	0	0	0	0	0	0	0	0	0	0	0	0	0	0	0	0	0	1	1	1	1
82	1	5	0	0	0	0	0	0	0	0	0	0	0	0	0	0	0	0	0	0	0	0	0	0	0	0	0	1	1
83		5	0	0	0	0	0	0	0	0	0	0	1	0	0	0	0	1	0	1	1	0	0	1	1	1	1	1	1
84		5	0	0	0	0	0	0	0	0	0	0	0	0	0	0	0	0	0	0	0	0	0	0	0	1	1	1	1
93		5	0	0	0	0
94		5	0	0	0	0
95		5	0	0	0	0
96		5	0	0	0	0
101		5	0	0	0	0	0	0	0	0	0	0	0	0	0	0	0	0	0	0	0	0	0	0	0
102	1	5	0	0	0	0	0	0	0	0	0	0	0	0	0	0	0	0	0	0	0	0	0	1	0
103		5	0	0	0	0	0	0	0	0	0	0	0	0	0	0	0	0	0	0	0	0	0	0	0
104	1	5	0	0	0	0	0	0	0	0	0	0	0	0	0	0	1	0	1	1	1	1	1	1	1
105		5	0	0	0	0	0	0	0	0	0	0	0	0	0	0	0	0	0	0	0	0	0	0	0
106		5	0	0	0	0	0	0	0	0	0	0	0	0	0	0	0	0	0	0	0	0	0	0	0
107		5	0	0	0	0	0	0	0	0	0	0	0	0	0	0	0	0	0	0	0	0	0	0	0
108		5	0	0	0	0	0	0	0	0	0	0	0	0	0	0	0	0	0	0	0	0	0	0	0
13	2	6	0	0	0	1	2	1	1	2	1	0	1	0	0	0	0	0	0	0	0	0	0	0	0	0	0	0	0	1	0	1	1	1	2	1	1
14	2	6	0	0	0	1	1	2	2	2	1	1	1	1	0	1	1	1	1	1	0	0	0	0	0	0	0	0	0	0	0	1	1	2	2	1	1
15	3	6	0	0	0	2	2	3	3	2	2	1	0	0	1	0	0	0	0	0	0	0	0	0	0	0	0	0	0	1	0	1	1	1	1	1	2
16	3	6	0	0	0	1	2	2	3	2	2	1	1	1	1	1	1	1	1	1	1	1	0	0	0	0	0	0	0	1	0	0	0	0	0	0	0
17	3	6	0	0	0	0	3	3	2	2	2	1	1	1	0	0	0	0	1	0	0	1	0	0	0	0	0	0	0	1	1	2	1	2	3	2	2
18	3	6	0	0	0	2	2	2	3	2	2	2	1	1	1	0	1	1	1	1	1	1	0	0	0	0	0	0	0	1	1	1	1	1	1	1	1
19	2	6	0	0	0	1	2	1	1	1	1	0	0	0	0	0	0	0	0	0	0	0	0	0	0	0	0	0	0	0	0	0	0	0	0	0	0
20	2	6	0	0	0	1	1	1	1	1	2	2	1	1	1	0	0	0	0	0	0	0	0	0	0	0	0	0	0	0	0	1	0	0	1	0	1
25	1	6	0	0	0	1
26	1	6	0	0	0	1
27	1	6	0	0	1	1
28	2	6	0	0	0	2
37	1	6	0	0	1	1	0	0	0
38	2	6	0	0	0	2	2	2	2
39	2	6	0	0	1	1	1	2	2
40	3	6	0	0	3	3	3	2	2
41	3	6	0	0	1	3	3	2	2
42	3	6	0	0	2	3	3	2	2
43	3	6	0	0	0	0	3	2	2
44	3	6	0	0	0	2	3	0	1
53	2	6	0	0	1	2	1	1	1	1	0	0	0	0	0	0	0
54	1	6	0	0	0	1	1	0	0	1	1	0	1	1	0	0	1
55	2	6	0	0	1	2	2	1	2	1	1	1	1	1	1	1	1
56	2	6	0	0	1	1	0	2	2	1	1	1	0	1	0	0	1
57	2	6	0	0	1	2	2	2	2	2	1	1	1	1	1	1	1
58	2	6	0	0	0	2	2	1	1	0	0	0	0	0	0	0	0
59	2	6	0	0	0	1	1	1	2	1	1	1	1	1	1	1	0
60	3	6	0	0	1	1	2	2	3	2	1	1	1	1	0	0	0
69		6	0	0
70		6	0	0
71		6	0	0
72		6	0	0
73		6	0	0
74		6	0	0
75		6	0	0
76		6	0	0
85	2	6	0	0	0	1	1	2	1	1	1	1	1	1	1	1	1	1	1	1	1	1	1	1	1	1	1	1	1
86	1	6	0	0	1	1	1	1	1	1	1	1	1	0	0	0	0	0	0	0	0	0	0	0	0	0	0	0	0
87	2	6	0	0	0	1	2	2	1	1	1	1	1	1	1	1	1	1	1	1	1	0	1	0	1	1	1	1	1
88	2	6	0	0	1	1	2	2	1	2	1	1	1	1	1	1	1	1	0	0	0	0	0	0	0	1	0	1	1
89	4	6	0	0	2	2	3	2	4	3	2	2	1	1	1	0	0	0	0	0	0	0	0	0					0
90	1	6	0	0	0	1	1	1	0	0	0	0	0	0	0	0	0	0	0	0	0	0	0	0	1	1	1	1	1
91	2	6	0	0	0	1	0	2	1	1	1	0	1	1	1	1	0	0	1	0	0	1	0	0	1	0	0	0	0
92	2	6	0	0	1	2	2	2	1	1	1	1	1	1	1	1	1	1	1	1	0	0	1	1	1	1	2	1	1
97	2	6	0	0	1	2
98		6	0	0	0	0
99	1	6	0	0	1	1
100		6	0	0	0	0
109	1	6	0	0	0	1	1	1	1	0	0	0	0	0	0	0	0	0	0	0	0	0	1	0	0
110	3	6	0	0	2	2	2	2	3	2	2	1	1	1	1	1	0	1	1	1	1	0	1	1	1
111	2	6	0	0	1	1	1	2	2	2	1	1	1	1	1	1	1	1	0	0	1	1	1	1	0
112	2	6	0	0	1	1	1	1	2	1	1	0	0	1	0	0	0	0	0	0	0	0	0	0	0
113	1	6	0	0	0	1	1	0	0	0	0	0	0	0	0	0	0	0	0	0	0	0	0	0	0
114	2	6	0	0	1	2	2	2	2	1	1	1	1	1	1	1	1	1	1	1	1	1	1	1	1
115	2	6	0	0	1	2	1	2	2	1	1	1	1	1	0	1	0	1	1	1	1	1	1	1	1
116	2	6	0	0	1	1	1	2	2	2	1	1	0	1	0	0	0	0	0	0	0	0	0	0	0

## Sheet: Absolute and relative weight
Weight development
absolute weight																																					relative weight
Animal ID	Gruppe	Day 0	1 dpi	2 dpi	3 dpi	4 dpi	5 dpi	6 dpi	7 dpi	8 dpi	9 dpi	10 dpi	11 dpi	12 dpi	13 dpi	14 dpi	15 dpi	16 dpi	17 dpi	18 dpi	19 dpi	20 dpi	21 dpi	28 dpi	35 dpi	42 dpi	49 dpi	56 dpi	63 dpi	70 dpi	77 dpi	84 dpi	91 dpi	98 dpi	105 dpi	112 dpi	Day 0	1 dpi	2 dpi	3 dpi	4 dpi	5 dpi	6 dpi	7 dpi	8 dpi	9 dpi	10 dpi	11 dpi	12 dpi
5	5	131	133	134	133	133	133	134	133	132	134	132	133	132	133	133	132	131	132	133	134	134	133	134	129	132	135	135	132	128	126	128	125	121	122	122	100	101.527	102.29	101.527	101.527	101.527	102.29	101.527	100.763	102.29	100.763	101.527	100.763
6	5	160	161	163	163	160	161	162	161	161	162	159	160	160	161	160	160	160	159	158	163	161	161	160	160	162	162	160	158	156	150	149	144	145	147	143	100	100.625	101.875	101.875	100	100.625	101.25	100.625	100.625	101.25	99.375	100	100
7	5	141	141	141	141	141	133	141	141	141	140	140	140	138	140	139	140	138	141	140	139	139	141	141	137	135	136	135	131	136	131	134	133	131	130	127	100	100	100	100	100	94.3262	100	100	100	99.2908	99.2908	99.2908	97.8723
8	5	122	124	125	126	125	123	123	125	123	124	124	123	124	123	126	124	125	125	128	126	126	126	127	125	128	126	128	123	123	120	117	115	112	113	112	100	101.639	102.459	103.279	102.459	100.82	100.82	102.459	100.82	101.639	101.639	100.82	101.639
9	5	159	159	157	160	160	157	159	158	157	160	158	155	158	158	158	158	157	156	157	157	158	155	155	153	152	153	152	152	155	154	157	155	152	153	155	100	100	98.7421	100.629	100.629	98.7421	100	99.3711	98.7421	100.629	99.3711	97.4843	99.3711
10	5	139	139	139	140	139	139	139	137	138	142	139	138	140	139	138	140	137	138	138	138	142	139	140	139	138	140	138	131	132	134	137	130	127	130	131	100	100	100	100.719	100	100	100	98.5612	99.2806	102.158	100	99.2806	100.719
11	5	149	149	148	148	148	148	150	148	151	151	148	150	151	151	148	150	149	149	148	148	149	149	150	146	146	147	144	144	146	138	144	144	143	142	141	100	100	99.3289	99.3289	99.3289	99.3289	100.671	99.3289	101.342	101.342	99.3289	100.671	101.342
12	5	150	150	149	152	148	147	151	149	152	153	151	152	152	153	152	152	151	153	151	154	153	154	155	148	148	148	146	142	140	142	139	138	137	136	139	100	100	99.3333	101.333	98.6667	98	100.667	99.3333	101.333	102	100.667	101.333	101.333
21	5	127	123	126	126																																100	96.8504	99.2126	99.2126
22	5	146	146	146	145																																100	100	100	99.3151
23	5	158	158	157	159																																100	100	99.3671	100.633
24	5	148	145	147	147																																100	97.973	99.3243	99.3243
29	5	167	164	164	167	163	163	165																													100	98.2036	98.2036	100	97.6048	97.6048	98.8024
30	5	143	144	146	146	145	148	145																													100	100.699	102.098	102.098	101.399	103.497	101.399
31	5	140	141	142	142	140	140	141																													100	100.714	101.429	101.429	100	100	100.714
32	5	133	142	142	142	142	144	143																													100	106.767	106.767	106.767	106.767	108.271	107.519
33	5	139	137	140	138	137	136	137																													100	98.5612	100.719	99.2806	98.5612	97.8417	98.5612
34	5	144	146	149	149	150	149	148																													100	101.389	103.472	103.472	104.167	103.472	102.778
35	5	139	139	139	140	139	139	140																													100	100	100	100.719	100	100	100.719
36	5	139	137	140	139	139	139	139																													100	98.5612	100.719	100	100	100	100
45	5	164	162	165	163	161	161	158	161	159	159	162	162	159	160	161																					100	98.7805	100.61	99.3902	98.1707	98.1707	96.3415	98.1707	96.9512	96.9512	98.7805	98.7805	96.9512
46	5	168	165	165	166	166	165	164	165	161	161	162	161	161	162	162																					100	98.2143	98.2143	98.8095	98.8095	98.2143	97.619	98.2143	95.8333	95.8333	96.4286	95.8333	95.8333
47	5	139	137	139	134	137	134	135	133	133	135	134	134	133	133	133																					100	98.5612	100	96.4029	98.5612	96.4029	97.1223	95.6835	95.6835	97.1223	96.4029	96.4029	95.6835
48	5	156	153	153	155	153	150	151	150	149	151	151	151	150	152	151																					100	98.0769	98.0769	99.359	98.0769	96.1538	96.7949	96.1538	95.5128	96.7949	96.7949	96.7949	96.1538
49	5	131	129	129	129	128	129	128	128	128	129	128	128	129	129	128																					100	98.4733	98.4733	98.4733	97.7099	98.4733	97.7099	97.7099	97.7099	98.4733	97.7099	97.7099	98.4733
50	5	136	131	132	132	132	132	134	132	133	133	132	134	133	135	134																					100	96.3235	97.0588	97.0588	97.0588	97.0588	98.5294	97.0588	97.7941	97.7941	97.0588	98.5294	97.7941
51	5	146	147	140	140	140	140	137	137	137	137	136	135	136	137	138																					100	100.685	95.8904	95.8904	95.8904	95.8904	93.8356	93.8356	93.8356	93.8356	93.1507	92.4658	93.1507
52	5	158	155	155	155	155	153	153	154	152	152	151	151	152	152	149																					100	98.1013	98.1013	98.1013	98.1013	96.8354	96.8354	97.4684	96.2025	96.2025	95.5696	95.5696	96.2025
61	5	135	135																																		100	100
62	5	150	150																																		100	100
63	5	135	130																																		100	96.2963
64	5	130	130																																		100	100
65	5	140	137																																		100	97.8571
66	5	136	140																																		100	102.941
67	5	121	123																																		100	101.653
68	5	130	130																																		100	100
77	5	151	151	150	151	154	152	153	152	154	151	152	153	152	155	153	153	152	155	150	153	151	150	145	146	146	143	144									100	100	99.3377	100	101.987	100.662	101.325	100.662	101.987	100	100.662	101.325	100.662
78	5	144	144	143	144	145	144	143	140	136	144	143	145	147	147	147	144	146	145	142	143	145	143	141	139	139	139	137									100	100	99.3056	100	100.694	100	99.3056	97.2222	94.4444	100	99.3056	100.694	102.083
79	5	146	143	146	144	147	144	145	146	145	145	145	146	145	146	144	145	145	147	145	144	145	146	142	138	138	139	136									100	97.9452	100	98.6301	100.685	98.6301	99.3151	100	99.3151	99.3151	99.3151	100	99.3151
80	5	148	150	150	150	149	149	150	152	148	151	148	151	149	151	150	149	151	149	147	149	147	146	146	146	146	144	143									100	101.351	101.351	101.351	100.676	100.676	101.351	102.703	100	102.027	100	102.027	100.676
81	5	147	147	146	146	145	145	144	145	146	145	143	145	143	144	143	144	145	143	143	144	143	142	141	139	139	138	138									100	100	99.3197	99.3197	98.6395	98.6395	97.9592	98.6395	99.3197	98.6395	97.2789	98.6395	97.2789
82	5	154	153	150	151	149	151	151	151	151	150	152	152	151	152	152	152	152	153	154	152	155	155	148	150	150	146	149									100	99.3506	97.4026	98.0519	96.7532	98.0519	98.0519	98.0519	98.0519	97.4026	98.7013	98.7013	98.0519
83	5	161	160	160	156	157	156	156	156	156	155	153	156	154	156	154	153	154	152	152	154	154	151	149	149	149	151	146									100	99.3789	99.3789	96.8944	97.5155	96.8944	96.8944	96.8944	96.8944	96.2733	95.0311	96.8944	95.6522
84	5	163	163	164	161	162	160	163	160	160	162	160	160	161	159	162	160	161	159	159	159	161	159	159	153	153	152	149									100	100	100.613	98.773	99.3865	98.1595	100	98.1595	98.1595	99.3865	98.1595	98.1595	98.773
93	5	146	146	148	147																																100	100	101.37	100.685
94	5	143	143	142	142																																100	100	99.3007	99.3007
95	5	147	149	151	147																																100	101.361	102.721	100
96	5	159	160	159	157																																100	100.629	100	98.7421
101	5	148	147	148	149	150	150	149	151	150	150	149	148	148	150	147	150	148	150	148	147	147	148	149													100	99.3243	100	100.676	101.351	101.351	100.676	102.027	101.351	101.351	100.676	100	100
102	5	136	133	135	135	135	134	134	134	135	134	135	134	134	134	133	131	133	132	133	132	131	129	130													100	97.7941	99.2647	99.2647	99.2647	98.5294	98.5294	98.5294	99.2647	98.5294	99.2647	98.5294	98.5294
103	5	146	144	147	146	145	145	145	146	145	145	143	144	144	143	145	145	145	147	144	143	142	143	140													100	98.6301	100.685	100	99.3151	99.3151	99.3151	100	99.3151	99.3151	97.9452	98.6301	98.6301
104	5	166	166	167	165	166	164	162	163	161	163	159	160	159	160	158	161	155	157	155	154	156	154	156													100	100	100.602	99.3976	100	98.7952	97.5904	98.1928	96.988	98.1928	95.7831	96.3855	95.7831
105	5	171	169	172	169	171	169	170	167	168	169	168	166	166	167	166	167	166	165	165	165	166	164	163													100	98.8304	100.585	98.8304	100	98.8304	99.4152	97.6608	98.2456	98.8304	98.2456	97.076	97.076
106	5	143	143	146	145	146	146	143	146	145	146	145	145	145	144	144	144	145	145	143	145	145	144	144													100	100	102.098	101.399	102.098	102.098	100	102.098	101.399	102.098	101.399	101.399	101.399
107	5	149	150	151	150	149	151	149	149	151	150	151	151	152	149	149	152	150	150	150	149	149	149	145													100	100.671	101.342	100.671	100	101.342	100	100	101.342	100.671	101.342	101.342	102.013
108	5	156	157	159	155	157	157	156	157	159	157	159	157	157	156	154	155	156	154	156	154	153	152	152													100	100.641	101.923	99.359	100.641	100.641	100	100.641	101.923	100.641	101.923	100.641	100.641
13	6	165	164	162	161	160	157	156	155	155	159	157	158	160	160	158	159	160	160	160	160	163	159	161	167	166	168	168	158	158	152	155	151	146	150	152	100	99.3939	98.1818	97.5758	96.9697	95.1515	94.5455	93.9394	93.9394	96.3636	95.1515	95.7576	96.9697
14	6	150	148	149	146	146	145	142	140	141	143	142	142	144	143	136	141	143	143	144	145	146	144	144	144	145	145	144	146	146	143	145	134	133	135	136	100	98.6667	99.3333	97.3333	97.3333	96.6667	94.6667	93.3333	94	95.3333	94.6667	94.6667	96
15	6	148	146	146	144	144	141	137	139	140	142	142	143	140	144	142	142	143	144	144	146	147	147	145	144	144	143	142	137	144	136	138	135	134	135	132	100	98.6486	98.6486	97.2973	97.2973	95.2703	92.5676	93.9189	94.5946	95.9459	95.9459	96.6216	94.5946
16	6	138	138	135	132	129	126	122	125	126	128	129	129	129	129	130	129	129	131	130	130	132	132	132	133	134	132	133	131	134	134	134	144	143	146	145	100	100	97.8261	95.6522	93.4783	91.3043	88.4058	90.5797	91.3043	92.7536	93.4783	93.4783	93.4783
17	6	148	149	147	144	145	141	139	138	139	140	141	140	144	143	142	142	139	143	143	140	143	142	142	143	142	142	143	135	141	131	136	130	123	131	131	100	100.676	99.3243	97.2973	97.973	95.2703	93.9189	93.2432	93.9189	94.5946	95.2703	94.5946	97.2973
18	6	173	170	167	164	163	161	160	160	162	164	164	161	163	166	162	163	163	164	162	164	165	165	168	165	166	165	166	164	163	161	164	160	158	159	161	100	98.2659	96.5318	94.7977	94.2197	93.0636	92.4855	92.4855	93.6416	94.7977	94.7977	93.0636	94.2197
19	6	154	157	152	148	146	144	140	143	145	148	149	147	148	151	151	152	150	154	153	154	152	153	151	152	153	151	153	154	153	150	154	153	150	152	152	100	101.948	98.7013	96.1039	94.8052	93.5065	90.9091	92.8571	94.1558	96.1039	96.7532	95.4545	96.1039
20	6	141	143	140	137	137	134	131	131	133	133	133	134	134	135	135	136	137	136	135	136	137	136	135	135	138	137	135	136	135	133	138	136	132	135	134	100	101.418	99.2908	97.1631	97.1631	95.0355	92.9078	92.9078	94.3262	94.3262	94.3262	95.0355	95.0355
25	6	144	148	143	142																																100	102.778	99.3056	98.6111
26	6	163	160	158	156																																100	98.1595	96.9325	95.7055
27	6	151	153	151	149																																100	101.325	100	98.6755
28	6	171	170	167	165																																100	99.4152	97.6608	96.4912
37	6	149	149	149	147	145	144	144																													100	100	100	98.6577	97.3154	96.6443	96.6443
38	6	157	156	154	150	148	146	147																													100	99.3631	98.0892	95.5414	94.2675	92.9936	93.6306
39	6	140	138	137	135	132	132	131																													100	98.5714	97.8571	96.4286	94.2857	94.2857	93.5714
40	6	148	144	141	140	140	140	141																													100	97.2973	95.2703	94.5946	94.5946	94.5946	95.2703
41	6	147	146	143	138	135	133	134																													100	99.3197	97.2789	93.8776	91.8367	90.4762	91.1565
42	6	137	131	130	129	126	125	128																													100	95.6204	94.8905	94.1606	91.9708	91.2409	93.4307
43	6	146	142	141	141	139	137	134																													100	97.2603	96.5753	96.5753	95.2055	93.8356	91.7808
44	6	152	151	149	145	144	146	146																													100	99.3421	98.0263	95.3947	94.7368	96.0526	96.0526
53	6	130	126	126	124	126	125	122	124	126	127	128	127	128	127	125																					100	96.9231	96.9231	95.3846	96.9231	96.1538	93.8462	95.3846	96.9231	97.6923	98.4615	97.6923	98.4615
54	6	138	139	135	134	134	133	132	129	130	132	131	130	133	133	131																					100	100.725	97.8261	97.1014	97.1014	96.3768	95.6522	93.4783	94.2029	95.6522	94.9275	94.2029	96.3768
55	6	158	154	153	149	148	146	145	147	148	145	146	147	150	149	148																					100	97.4684	96.8354	94.3038	93.6709	92.4051	91.7722	93.038	93.6709	91.7722	92.4051	93.038	94.9367
56	6	154	151	150	149	147	146	144	144	146	145	147	144	148	149	146																					100	98.0519	97.4026	96.7532	95.4545	94.8052	93.5065	93.5065	94.8052	94.1558	95.4545	93.5065	96.1039
57	6	153	148	147	145	145	141	140	140	141	143	143	144	144	143	145																					100	96.732	96.0784	94.7712	94.7712	92.1569	91.5033	91.5033	92.1569	93.4641	93.4641	94.1176	94.1176
58	6	151	147	146	146	145	145	141	144	144	147	147	147	150	151	148																					100	97.351	96.6887	96.6887	96.0265	96.0265	93.3775	95.3642	95.3642	97.351	97.351	97.351	99.3377
59	6	139	137	136	134	133	131	127	129	131	131	141	131	131	130	133																					100	98.5612	97.8417	96.4029	95.6835	94.2446	91.3669	92.8058	94.2446	94.2446	101.439	94.2446	94.2446
60	6	163	160	157	156	156	156	154	153	153	153	155	155	157	156	157																					100	98.1595	96.319	95.7055	95.7055	95.7055	94.4785	93.865	93.865	93.865	95.092	95.092	96.319
69	6	146	142																																		100	97.2603
70	6	148	148																																		100	100
71	6	130	128																																		100	98.4615
72	6	134	131																																		100	97.7612
73	6	151	148																																		100	98.0132
74	6	129	127																																		100	98.4496
75	6	158	155																																		100	98.1013
76	6	158	160																																		100	101.266
85	6	170	171	168	163	162	158	158	160	159	161	160	161	160	160	160	159	156	157	158	159	158	158	153	154	154	155	155									100	100.588	98.8235	95.8824	95.2941	92.9412	92.9412	94.1176	93.5294	94.7059	94.1176	94.7059	94.1176
86	6	148	145	144	142	142	142	140	138	141	140	145	144	144	146	144	146	145	147	147	148	146	147	145	145	145	145	144									100	97.973	97.2973	95.9459	95.9459	95.9459	94.5946	93.2432	95.2703	94.5946	97.973	97.2973	97.2973
87	6	158	159	154	151	148	148	146	146	148	147	148	149	147	149	149	146	150	148	150	151	150	149	146	142	142	143	142									100	100.633	97.4684	95.5696	93.6709	93.6709	92.4051	92.4051	93.6709	93.038	93.6709	94.3038	93.038
88	6	152	152	150	146	143	138	136	134	138	138	140	142	141	143	143	143	146	147	145	146	146	146	146	144	144	144	142									100	100	98.6842	96.0526	94.0789	90.7895	89.4737	88.1579	90.7895	90.7895	92.1053	93.4211	92.7632
89	6	134	129	126	122	121	117	111	113	117	118	121	124	126	131	132	135	134	137	139	140	140	138														100	96.2687	94.0299	91.0448	90.2985	87.3134	82.8358	84.3284	87.3134	88.0597	90.2985	92.5373	94.0299
90	6	163	163	162	159	159	158	156	156	158	159	159	158	159	160	159	159	158	158	161	159	158	158	155	153	153	154	153									100	100	99.3865	97.546	97.546	96.9325	95.7055	95.7055	96.9325	97.546	97.546	96.9325	97.546
91	6	143	141	139	137	138	135	134	130	133	137	135	134	135	136	137	138	135	137	137	136	138	138	135	137	137	137	141									100	98.6014	97.2028	95.8042	96.5035	94.4056	93.7063	90.9091	93.007	95.8042	94.4056	93.7063	94.4056
92	6	164	164	164	156	155	152	150	148	152	153	153	153	153	156	155	153	155	156	157	157	156	153	154	147	147	156	155									100	100	100	95.122	94.5122	92.6829	91.4634	90.2439	92.6829	93.2927	93.2927	93.2927	93.2927
97	6	142	140	137	135																																100	98.5915	96.4789	95.0704
98	6	140	142	137	136																																100	101.429	97.8571	97.1429
99	6	151	149	147	149																																100	98.6755	97.351	98.6755
100	6	162	158	156	155																																100	97.5309	96.2963	95.679
109	6	145	145	145	142	145	144	141	141	142	142	142	143	141	142	143	143	143	140	141	142	138	140	139													100	100	100	97.931	100	99.3103	97.2414	97.2414	97.931	97.931	97.931	98.6207	97.2414
110	6	150	150	140	140	139	136	134	139	138	142	141	142	142	140	145	142	141	142	142	144	140	140	142													100	100	93.3333	93.3333	92.6667	90.6667	89.3333	92.6667	92	94.6667	94	94.6667	94.6667
111	6	138	136	137	134	135	131	127	124	125	127	129	128	129	128	130	130	132	133	130	130	129	131	132													100	98.5507	99.2754	97.1014	97.8261	94.9275	92.029	89.8551	90.5797	92.029	93.4783	92.7536	93.4783
112	6	154	150	151	150	150	147	143	142	145	148	148	146	149	148	148	149	151	149	149	149	149	150	151													100	97.4026	98.0519	97.4026	97.4026	95.4545	92.8571	92.2078	94.1558	96.1039	96.1039	94.8052	96.7532
113	6	144	144	143	140	143	141	140	139	142	142	144	143	144	144	144	142	147	143	141	144	143	146	139													100	100	99.3056	97.2222	99.3056	97.9167	97.2222	96.5278	98.6111	98.6111	100	99.3056	100
114	6	157	154	153	149	148	145	147	148	148	149	149	149	148	147	148	147	146	146	146	144	147	144	144													100	98.0892	97.4522	94.9045	94.2675	92.3567	93.6306	94.2675	94.2675	94.9045	94.9045	94.9045	94.2675
115	6	149	147	144	143	145	141	137	137	141	141	141	139	143	140	143	142	141	141	141	141	140	138	137													100	98.6577	96.6443	95.9732	97.3154	94.6309	91.9463	91.9463	94.6309	94.6309	94.6309	93.2886	95.9732
116	6	141	140	139	137	137	134	130	129	132	133	135	134	136	135	136	135	137	135	136	136	135	136	137													100	99.2908	98.5816	97.1631	97.1631	95.0355	92.1986	91.4894	93.617	94.3262	95.7447	95.0355	96.4539
[truncated: 22 more columns]

## Sheet: Clinical score weight
Score Category "Weight"
Score 1
Score 2
Score 3
Animal ID	maximum score (1-21 dpi)	Gruppe	0 dpi	1 dpi	2 dpi	3 dpi	4 dpi	5 dpi	6 dpi	7 dpi	8 dpi	9 dpi	10 dpi	11 dpi	12 dpi	13 dpi	14 dpi	15 dpi	16 dpi	17 dpi	18 dpi	19 dpi	20 dpi	21 dpi	28 dpi	35 dpi	42 dpi	49 dpi	56 dpi	63 dpi	70 dpi	77 dpi	84 dpi	91 dpi	98 dpi	105 dpi	112 dpi
5	0	5	0	0	0	0	0	0	0	0	0	0	0	0	0	0	0	0	0	0	0	0	0	0	0	0	0	0	0	0	0	0	0	0	1	1	1
6	0	5	0	0	0	0	0	0	0	0	0	0	0	0	0	0	0	0	0	0	0	0	0	0	0	0	0	0	0	0	0	1	1	1	1	1	1
7	0	5	0	0	0	0	0	0	0	0	0	0	0	0	0	0	0	0	0	0	0	0	0	0	0	0	0	0	0	1	0	1	1	1	1	1	1
8	0	5	0	0	0	0	0	0	0	0	0	0	0	0	0	0	0	0	0	0	0	0	0	0	0	0	0	0	0	0	0	0	0	1	1	1	1
9	0	5	0	0	0	0	0	0	0	0	0	0	0	0	0	0	0	0	0	0	0	0	0	0	0	0	0	0	0	1	0	0	0	0	0	0	0
10	0	5	0	0	0	0	0	0	0	0	0	0	0	0	0	0	0	0	0	0	0	0	0	0	0	0	0	0	0	1	1	0	0	1	1	1	1
11	0	5	0	0	0	0	0	0	0	0	0	0	0	0	0	0	0	0	0	0	0	0	0	0	0	0	0	0	0	0	0	1	0	0	0	1	1
12	0	5	0	0	0	0	0	0	0	0	0	0	0	0	0	0	0	0	0	0	0	0	0	0	0	0	0	0	0	0	1	1	1	1	1	1	1
21	0	5	0	0	0	0
22	0	5	0	0	0	0
23	0	5	0	0	0	0
24	0	5	0	0	0	0
29	0	5	0	0	0	0	0	0	0
30	0	5	0	0	0	0	0	0	0
31	0	5	0	0	0	0	0	0	0
32	0	5	0	0	0	0	0	0	0
33	0	5	0	0	0	0	0	0	0
34	0	5	0	0	0	0	0	0	0
35	0	5	0	0	0	0	0	0	0
36	0	5	0	0	0	0	0	0	0
45	0	5	0	0	0	0	0	0	0	0	0	0	0	0	0	0	0
46	0	5	0	0	0	0	0	0	0	0	0	0	0	0	0	0	0
47	0	5	0	0	0	0	0	0	0	0	0	0	0	0	0	0	0
48	0	5	0	0	0	0	0	0	0	0	0	0	0	0	0	0	0
49	0	5	0	0	0	0	0	0	0	0	0	0	0	0	0	0	0
50	0	5	0	0	0	0	0	0	0	0	0	0	0	0	0	0	0
51	1	5	0	0	0	0	0	0	1	1	1	1	1	1	1	1	1
52	0	5	0	0	0	0	0	0	0	0	0	0	0	0	0	0	1
61	0	5	0	0
62	0	5	0	0
63	0	5	0	0
64	0	5	0	0
65	0	5	0	0
66	0	5	0	0
67	0	5	0	0
68	0	5	0	0
77	0	5	0	0	0	0	0	0	0	0	0	0	0	0	0	0	0	0	0	0	0	0	0	0	0	0	0	1	0
78	1	5	0	0	0	0	0	0	0	0	1	0	0	0	0	0	0	0	0	0	0	0	0	0	0	0	0	0	1
79	0	5	0	0	0	0	0	0	0	0	0	0	0	0	0	0	0	0	0	0	0	0	0	0	0	1	0	1	1
80	0	5	0	0	0	0	0	0	0	0	0	0	0	0	0	0	0	0	0	0	0	0	0	0	0	0	0	0	0
81	0	5	0	0	0	0	0	0	0	0	0	0	0	0	0	0	0	0	0	0	0	0	0	0	0	1	1	1	1
82	0	5	0	0	0	0	0	0	0	0	0	0	0	0	0	0	0	0	0	0	0	0	0	0	0	0	0	1	1
83	1	5	0	0	0	0	0	0	0	0	0	0	1	0	0	0	0	1	0	1	1	0	0	1	1	1	1	1	1
84	0	5	0	0	0	0	0	0	0	0	0	0	0	0	0	0	0	0	0	0	0	0	0	0	0	1	1	1	1
93	0	5	0	0	0	0
94	0	5	0	0	0	0
95	0	5	0	0	0	0
96	0	5	0	0	0	0
101	0	5	0	0	0	0	0	0	0	0	0	0	0	0	0	0	0	0	0	0	0	0	0	0	0
102	1	5	0	0	0	0	0	0	0	0	0	0	0	0	0	0	0	0	0	0	0	0	0	1	0
103	0	5	0	0	0	0	0	0	0	0	0	0	0	0	0	0	0	0	0	0	0	0	0	0	0
104	1	5	0	0	0	0	0	0	0	0	0	0	0	0	0	0	1	0	1	1	1	1	1	1	1
105	0	5	0	0	0	0	0	0	0	0	0	0	0	0	0	0	0	0	0	0	0	0	0	0	0
106	0	5	0	0	0	0	0	0	0	0	0	0	0	0	0	0	0	0	0	0	0	0	0	0	0
107	0	5	0	0	0	0	0	0	0	0	0	0	0	0	0	0	0	0	0	0	0	0	0	0	0
108	0	5	0	0	0	0	0	0	0	0	0	0	0	0	0	0	0	0	0	0	0	0	0	0	0
13	1	6	0	0	0	0	0	1	1	1	1	0	1	0	0	0	0	0	0	0	0	0	0	0	0	0	0	0	0	1	0	1	1	1	2	1	1
14	1	6	0	0	0	0	0	0	1	1	1	1	1	1	0	1	1	1	1	1	0	0	0	0	0	0	0	0	0	0	0	1	1	2	2	1	1
15	1	6	0	0	0	0	0	1	1	1	1	0	0	0	1	0	0	0	0	0	0	0	0	0	0	0	0	0	0	1	0	1	1	1	1	1	2
16	2	6	0	0	0	0	1	1	2	1	1	1	1	1	1	1	1	1	1	1	1	1	0	0	0	0	0	0	0	1	0	0	0	0	0	0	0
17	1	6	0	0	0	0	0	1	1	1	1	1	1	1	0	0	0	0	1	0	0	1	0	0	0	0	0	0	0	1	1	2	1	2	3	2	2
18	1	6	0	0	0	1	1	1	1	1	1	1	1	1	1	0	1	1	1	1	1	1	0	0	0	0	0	0	0	1	1	1	1	1	1	1	1
19	1	6	0	0	0	0	1	1	1	1	1	0	0	0	0	0	0	0	0	0	0	0	0	0	0	0	0	0	0	0	0	0	0	0	0	0	0
20	1	6	0	0	0	0	0	1	1	1	1	1	1	1	1	0	0	0	0	0	0	0	0	0	0	0	0	0	0	0	0	1	0	0	1	0	1
25	0	6	0	0	0	0
26	0	6	0	0	0	0
27	0	6	0	0	0	0
28	0	6	0	0	0	0
37	0	6	0	0	0	0	0	0	0
38	1	6	0	0	0	0	1	1	1
39	1	6	0	0	0	0	1	1	1
40	1	6	0	0	1	1	1	1	1
41	1	6	0	0	0	1	1	1	1
42	1	6	0	0	1	1	1	1	1
43	1	6	0	0	0	0	1	1	1
44	1	6	0	0	0	0	1	0	0
53	1	6	0	0	0	1	0	0	1	1	0	0	0	0	0	0	0
54	1	6	0	0	0	0	0	0	0	1	1	0	1	1	0	0	1
55	1	6	0	0	0	1	1	1	1	1	1	1	1	1	1	1	1
56	1	6	0	0	0	0	0	1	1	1	1	1	0	1	0	0	1
57	1	6	0	0	0	1	1	1	1	1	1	1	1	1	1	1	1
58	1	6	0	0	0	0	0	0	1	0	0	0	0	0	0	0	0
59	1	6	0	0	0	0	0	1	1	1	1	1	1	1	1	1	0
60	1	6	0	0	0	0	0	0	1	1	1	1	1	1	0	0	0
69	0	6	0	0
70	0	6	0	0
71	0	6	0	0
72	0	6	0	0
73	0	6	0	0
74	0	6	0	0
75	0	6	0	0
76	0	6	0	0
85	1	6	0	0	0	0	1	1	1	1	1	1	1	1	1	1	1	1	1	1	1	1	1	1	1	1	1	1	1
86	1	6	0	0	0	0	0	0	1	1	1	1	1	0	0	0	0	0	0	0	0	0	0	0	0		0	0	0
87	1	6	0	0	0	0	1	1	1	1	1	1	1	1	1	1	1	1	1	1	1	0	1	0	1	1	1	1	1
88	2	6	0	0	0	0	1	1	1	2	1	1	1	1	1	1	1	1	0	0	0	0	0	0	0	1	0	1	1
89	3	6	0	0	1	1	1	2	3	3	2	2	1	1	1	0	0	0	0	0	0	0	0	0
90	0	6	0	0	0	0	0	0	0	0	0	0	0	0	0	0	0	0	0	0	0	0	0	0	1	1	1	1	1
91	1	6	0	0	0	0	0	1	1	1	1	0	1	1	1	1	0	0	1	0	0	1	0	0	1	0	0	0	0
92	1	6	0	0	0	1	1	1	1	1	1	1	1	1	1	1	1	1	1	1	0	0	1	1	1	1	2	1	1
97	1	6	0	0	0	1
98	0	6	0	0	0	0
99	0	6	0	0	0	0
100	0	6	0	0	0	0
109	1	6	0	0	0	0	0	0	0	0	0	0	0	0	0	0	0	0	0	0	0	0	1	0	0
110	2	6	0	0	1	1	1	1	2	1	1	1	1	1	1	1	0	1	1	1	1	0	1	1	1
111	1	6	0	0	0	0	0	1	1	1	1	1	1	1	1	1	1	1	0	0	1	1	1	1	0
112	1	6	0	0	0	0	0	0	1	1	1	0	0	1	0	0	0	0	0	0	0	0	0	0	0
113	0	6	0	0	0	0	0	0	0	0	0	0	0	0	0	0	0	0	0	0	0	0	0	0	0
114	1	6	0	0	0	1	1	1	1	1	1	1	1	1	1	1	1	1	1	1	1	1	1	1	1
115	1	6	0	0	0	0	0	1	1	1	1	1	1	1	0	1	0	1	1	1	1	1	1	1	1
116	1	6	0	0	0	0	0	1	1	1	1	1	0	1	0	0	0	0	0	0	0	0	0	0	0

## Sheet: Clinical score respiratory
Score category “upper respiratory tract”
Score 1
Score 2
Score 3
Animal ID	maximum score	Gruppe	0 dpi	1 dpi	2 dpi	3 dpi	4 dpi	5 dpi	6 dpi	7 dpi	8 dpi	9 dpi	10 dpi	11 dpi	12 dpi	13 dpi	14 dpi	15 dpi	16 dpi	17 dpi	18 dpi	19 dpi	20 dpi	21 dpi	28 dpi	35 dpi	42 dpi	49 dpi	56 dpi	63 dpi	70 dpi	77 dpi	84 dpi	91 dpi	98 dpi	105 dpi	112 dpi
5	0	5	0	0	0	0	0	0	0	0	0	0	0	0	0	0	0	0	0	0	0	0	0	0	0	0	0	0	0	0	0	0	0	0	0	0	0
6	0	5	0	0	0	0	0	0	0	0	0	0	0	0	0	0	0	0	0	0	0	0	0	0	0	0	0	0	0	0	0	0	0	0	0	0	0
7	0	5	0	0	0	0	0	0	0	0	0	0	0	0	0	0	0	0	0	0	0	0	0	0	0	0	0	0	0	0	0	0	0	0	0	0	0
8	0	5	0	0	0	0	0	0	0	0	0	0	0	0	0	0	0	0	0	0	0	0	0	0	0	0	0	0	0	0	0	0	0	0	0	0	0
9	0	5	0	0	0	0	0	0	0	0	0	0	0	0	0	0	0	0	0	0	0	0	0	0	0	0	0	0	0	0	0	0	0	0	0	0	0
10	0	5	0	0	0	0	0	0	0	0	0	0	0	0	0	0	0	0	0	0	0	0	0	0	0	0	0	0	0	0	0	0	0	0	0	0	0
11	0	5	0	0	0	0	0	0	0	0	0	0	0	0	0	0	0	0	0	0	0	0	0	0	0	0	0	0	0	0	0	0	0	0	0	0	0
12	0	5	0	0	0	0	0	0	0	0	0	0	0	0	0	0	0	0	0	0	0	0	0	0	0	0	0	0	0	0	0	0	0	0	0	0	0
21	0	5	0	0	0	0
22	0	5	0	0	0	0
23	0	5	0	0	0	0
24	0	5	0	0	0	0
29	0	5	0	0	0	0	0	0	0
30	0	5	0	0	0	0	0	0	0
31	0	5	0	0	0	0	0	0	0
32	0	5	0	0	0	0	0	0	0
33	0	5	0	0	0	0	0	0	0
34	0	5	0	0	0	0	0	0	0
35	0	5	0	0	0	0	0	0	0
36	0	5	0	0	0	0	0	0	0
45	0	5	0	0	0	0	0	0	0	0	0	0	0	0	0	0	0
46	0	5	0	0	0	0	0	0	0	0	0	0	0	0	0	0	0
47	0	5	0	0	0	0	0	0	0	0	0	0	0	0	0	0	0
48	0	5	0	0	0	0	0	0	0	0	0	0	0	0	0	0	0
49	0	5	0	0	0	0	0	0	0	0	0	0	0	0	0	0	0
50	0	5	0	0	0	0	0	0	0	0	0	0	0	0	0	0	0
51	0	5	0	0	0	0	0	0	0	0	0	0	0	0	0	0	0
52	0	5	0	0	0	0	0	0	0	0	0	0	0	0	0	0	0
61	0	5	0	0
62	0	5	0	0
63	0	5	0	0
64	0	5	0	0
65	0	5	0	0
66	0	5	0	0
67	0	5	0	0
68	0	5	0	0
77	0	5	0	0	0	0	0	0	0	0	0	0	0	0	0	0	0	0	0	0	0	0	0	0	0	0	0	0	0
78	0	5	0	0	0	0	0	0	0	0	0	0	0	0	0	0	0	0	0	0	0	0	0	0	0	0	0	0	0
79	0	5	0	0	0	0	0	0	0	0	0	0	0	0	0	0	0	0	0	0	0	0	0	0	0	0	0	0	0
80	0	5	0	0	0	0	0	0	0	0	0	0	0	0	0	0	0	0	0	0	0	0	0	0	0	0	0	0	0
81	0	5	0	0	0	0	0	0	0	0	0	0	0	0	0	0	0	0	0	0	0	0	0	0	0	0	0	0	0
82	0	5	0	0	0	0	0	0	0	0	0	0	0	0	0	0	0	0	0	0	0	0	0	0	0	0	0	0	0
83	0	5	0	0	0	0	0	0	0	0	0	0	0	0	0	0	0	0	0	0	0	0	0	0	0	0	0	0	0
84	0	5	0	0	0	0	0	0	0	0	0	0	0	0	0	0	0	0	0	0	0	0	0	0	0	0	0	0	0
93	0	5	0	0	0	0
94	0	5	0	0	0	0
95	0	5	0	0	0	0
96	0	5	0	0	0	0
101	0	5	0	0	0	0	0	0	0	0	0	0	0	0	0	0	0	0	0	0	0	0	0	0	0
102	0	5	0	0	0	0	0	0	0	0	0	0	0	0	0	0	0	0	0	0	0	0	0	0	0
103	0	5	0	0	0	0	0	0	0	0	0	0	0	0	0	0	0	0	0	0	0	0	0	0	0
104	0	5	0	0	0	0	0	0	0	0	0	0	0	0	0	0	0	0	0	0	0	0	0	0	0
105	0	5	0	0	0	0	0	0	0	0	0	0	0	0	0	0	0	0	0	0	0	0	0	0	0
106	0	5	0	0	0	0	0	0	0	0	0	0	0	0	0	0	0	0	0	0	0	0	0	0	0
107	0	5	0	0	0	0	0	0	0	0	0	0	0	0	0	0	0	0	0	0	0	0	0	0	0
108	0	5	0	0	0	0	0	0	0	0	0	0	0	0	0	0	0	0	0	0	0	0	0	0	0
13	1	6	0	0	0	1	1	0	0	1	0	0	0	0	0	0	0	0	0	0	0	0	0	0	0	0	0	0	0	0	0	0	0	0	0	0	0
14	1	6	0	0	0	1	1	1	0	0	0	0	0	0	0	0	0	0	0	0	0	0	0	0	0	0	0	0	0	0	0	0	0	0	0	0	0
15	1	6	0	0	0	1	1	1	1	0	0	0	0	0	0	0	0	0	0	0	0	0	0	0	0	0	0	0	0	0	0	0	0	0	0	0	0
16	1	6	0	0	0	1	1	0	0	0	0	0	0	0	0	0	0	0	0	0	0	0	0	0	0	0	0	0	0	0	0	0	0	0	0	0	0
17	1	6	0	0	0	0	1	1	0	0	0	0	0	0	0	0	0	0	0	0	0	0	0	0	0	0	0	0	0	0	0	0	0	0	0	0	0
18	1	6	0	0	0	1	1	0	1	0	0	0	0	0	0	0	0	0	0	0	0	0	0	0	0	0	0	0	0	0	0	0	0	0	0	0	0
19	1	6	0	0	0	1	1	0	0	0	0	0	0	0	0	0	0	0	0	0	0	0	0	0	0	0	0	0	0	0	0	0	0	0	0	0	0
20	1	6	0	0	0	1	1	0	0	0	0	0	0	0	0	0	0	0	0	0	0	0	0	0	0	0	0	0	0	0	0	0	0	0	0	0	0
25	1	6	0	0	0	1
26	1	6	0	0	0	1
27	1	6	0	0	1	1
28	1	6	0	0	0	1
37	1	6	0	0	1	1	0	0	0
38	1	6	0	0	0	1	1	1	1
39	1	6	0	0	1	1	0	1	1
40	1	6	0	0	1	1	1	1	1
41	1	6	0	0	1	1	1	1	1
42	1	6	0	0	1	1	1	1	1
43	1	6	0	0	0	0	1	1	1
44	1	6	0	0	0	1	1	0	1
53	1	6	0	0	1	1	1	1	0	0	0	0	0	0	0	0	0
54	1	6	0	0	0	1	1	0	0	0	0	0	0	0	0	0	0
55	1	6	0	0	1	1	1	0	1	0	0	0	0	0	0	0	0
56	1	6	0	0	1	1	0	1	1	0	0	0	0	0	0	0	0
57	1	6	0	0	1	1	1	1	1	1	0	0	0	0	0	0	0
58	1	6	0	0	0	1	1	0	0	0	0	0	0	0	0	0	0
59	1	6	0	0	0	1	1	0	1	0	0	0	0	0	0	0	0
60	1	6	0	0	1	1	1	1	1	1	0	0	0	0	0	0	0
69	0	6	0	0
70	0	6	0	0
71	0	6	0	0
72	0	6	0	0
73	0	6	0	0
74	0	6	0	0
75	0	6	0	0
76	0	6	0	0
85	1	6	0	0	0	1	0	1	0	0	0	0	0	0	0	0	0	0	0	0	0	0	0	0	0	0	0	0	0
86	1	6	0	0	1	1	1	1	0	0	0	0	0	0	0	0	0	0	0	0	0	0	0	0	0	0	0	0	0
87	1	6	0	0	0	1	0	1	0	0	0	0	0	0	0	0	0	0	0	0	0	0	0	0	0	0	0	0	0
88	1	6	0	0	1	1	1	1	0	0	0	0	0	0	0	0	0	0	0	0	0	0	0	0	0	0	0	0	0
89	1	6	0	0	1	1	1	0	1	0	0	0	0	0	0	0	0	0	0	0	0	0	0	0
90	1	6	0	0	0	1	1	0	0	0	0	0	0	0	0	0	0	0	0	0	0	0	0	0	0	0	0	0	0
91	1	6	0	0	0	1	0	1	0	0	0	0	0	0	0	0	0	0	0	0	0	0	0	0	0	0	0	0	0
92	1	6	0	0	1	1	1	1	0	0	0	0	0	0	0	0	0	0	0	0	0	0	0	0	0	0	0	0	0
97	1	6	0	0	1	1
98	0	6	0	0	0	0
99	1	6	0	0	1	1
100	0	6	0	0	0	0
109	1	6	0	0	0	1	1	1	1	0	0	0	0	0	0	0	0	0	0	0	0	0	0	0	0
110	1	6	0	0	1	1	1	1	1	1	1	0	0	0	0	0	0	0	0	0	0	0	0	0	0
111	1	6	0	0	1	1	1	1	1	1	0	0	0	0	0	0	0	0	0	0	0	0	0	0	0
112	1	6	0	0	1	1	1	1	1	0	0	0	0	0	0	0	0	0	0	0	0	0	0	0	0
113	1	6	0	0	0	1	1	0	0	0	0	0	0	0	0	0	0	0	0	0	0	0	0	0	0
114	1	6	0	0	1	1	1	1	1	0	0	0	0	0	0	0	0	0	0	0	0	0	0	0	0
115	1	6	0	0	1	1	1	1	1	0	0	0	0	0	0	0	0	0	0	0	0	0	0	0	0
116	1	6	0	0	1	1	1	1	1	1	0	0	0	0	0	0	0	0	0	0	0	0	0	0	0

## Sheet: Clinical score behavior
Score category "behavior"
Score 1
Score 2
Score 3
Animal ID	maximum score	Gruppe	0 dpi	1 dpi	2 dpi	3 dpi	4 dpi	5 dpi	6 dpi	7 dpi	8 dpi	9 dpi	10 dpi	11 dpi	12 dpi	13 dpi	14 dpi	15 dpi	16 dpi	17 dpi	18 dpi	19 dpi	20 dpi	21 dpi	28 dpi	35 dpi	42 dpi	49 dpi	56 dpi	63 dpi	70 dpi	77 dpi	84 dpi	91 dpi	98 dpi	105 dpi	112 dpi
5		5	0	0	0	0	0	0	0	0	0	0	0	0	0	0	0	0	0	0	0	0	0	0	0	0	0	0	0	0	0	0	0	0	0	0	0
6		5	0	0	0	0	0	0	0	0	0	0	0	0	0	0	0	0	0	0	0	0	0	0	0	0	0	0	0	0	0	0	0	0	0	0	0
7		5	0	0	0	0	0	0	0	0	0	0	0	0	0	0	0	0	0	0	0	0	0	0	0	0	0	0	0	0	0	0	0	0	0	0	0
8		5	0	0	0	0	0	0	0	0	0	0	0	0	0	0	0	0	0	0	0	0	0	0	0	0	0	0	0	0	0	0	0	0	0	0	0
9		5	0	0	0	0	0	0	0	0	0	0	0	0	0	0	0	0	0	0	0	0	0	0	0	0	0	0	0	0	0	0	0	0	0	0	0
10		5	0	0	0	0	0	0	0	0	0	0	0	0	0	0	0	0	0	0	0	0	0	0	0	0	0	0	0	0	0	0	0	0	0	0	0
11		5	0	0	0	0	0	0	0	0	0	0	0	0	0	0	0	0	0	0	0	0	0	0	0	0	0	0	0	0	0	0	0	0	0	0	0
12		5	0	0	0	0	0	0	0	0	0	0	0	0	0	0	0	0	0	0	0	0	0	0	0	0	0	0	0	0	0	0	0	0	0	0	0
21		5	0	0	0	0
22		5	0	0	0	0
23		5	0	0	0	0
24		5	0	0	0	0
29		5	0	0	0	0	0	0	0
30		5	0	0	0	0	0	0	0
35		5	0	0	0	0	0	0	0
36		5	0	0	0	0	0	0	0
45		5	0	0	0	0	0	0	0	0	0	0	0	0	0	0	0
46		5	0	0	0	0	0	0	0	0	0	0	0	0	0	0	0
47		5	0	0	0	0	0	0	0	0	0	0	0	0	0	0	0
48		5	0	0	0	0	0	0	0	0	0	0	0	0	0	0	0
49		5	0	0	0	0	0	0	0	0	0	0	0	0	0	0	0
50		5	0	0	0	0	0	0	0	0	0	0	0	0	0	0	0
51		5	0	0	0	0	0	0	0	0	0	0	0	0	0	0	0
52		5	0	0	0	0	0	0	0	0	0	0	0	0	0	0	0
61		5	0	0
62		5	0	0
63		5	0	0
64		5	0	0
65		5	0	0
66		5	0	0
67		5	0	0
68		5	0	0
77		5	0	0	0	0	0	0	0	0	0	0	0	0	0	0	0	0	0	0	0	0	0	0	0	0	0	0	0
78		5	0	0	0	0	0	0	0	0	0	0	0	0	0	0	0	0	0	0	0	0	0	0	0	0	0	0	0
79		5	0	0	0	0	0	0	0	0	0	0	0	0	0	0	0	0	0	0	0	0	0	0	0	0	0	0	0
80		5	0	0	0	0	0	0	0	0	0	0	0	0	0	0	0	0	0	0	0	0	0	0	0	0	0	0	0
81		5	0	0	0	0	0	0	0	0	0	0	0	0	0	0	0	0	0	0	0	0	0	0	0	0	0	0	0
82		5	0	0	0	0	0	0	0	0	0	0	0	0	0	0	0	0	0	0	0	0	0	0	0	0	0	0	0
83		5	0	0	0	0	0	0	0	0	0	0	0	0	0	0	0	0	0	0	0	0	0	0	0	0	0	0	0
84		5	0	0	0	0	0	0	0	0	0	0	0	0	0	0	0	0	0	0	0	0	0	0	0	0	0	0	0
93		5	0	0	0	0
94		5	0	0	0	0
95		5	0	0	0	0
96		5	0	0	0	0
101		5	0	0	0	0	0	0	0	0	0	0	0	0	0	0	0	0	0	0	0	0	0	0	0
102		5	0	0	0	0	0	0	0	0	0	0	0	0	0	0	0	0	0	0	0	0	0	0	0
103		5	0	0	0	0	0	0	0	0	0	0	0	0	0	0	0	0	0	0	0	0	0	0	0
104		5	0	0	0	0	0	0	0	0	0	0	0	0	0	0	0	0	0	0	0	0	0	0	0
105		5	0	0	0	0	0	0	0	0	0	0	0	0	0	0	0	0	0	0	0	0	0	0	0
106		5	0	0	0	0	0	0	0	0	0	0	0	0	0	0	0	0	0	0	0	0	0	0	0
107		5	0	0	0	0	0	0	0	0	0	0	0	0	0	0	0	0	0	0	0	0	0	0	0
108		5	0	0	0	0	0	0	0	0	0	0	0	0	0	0	0	0	0	0	0	0	0	0	0
13	1	6	0	0	0	0	1	0	0	0	0	0	0	0	0	0	0	0	0	0	0	0	0	0	0	0	0	0	0	0	0	0	0	0	0	0	0
14	1	6	0	0	0	0	0	1	1	1	0	0	0	0	0	0	0	0	0	0	0	0	0	0	0	0	0	0	0	0	0	0	0	0	0	0	0
15	1	6	0	0	0	1	1	1	1	1	1	1	0	0	0	0	0	0	0	0	0	0	0	0	0	0	0	0	0	0	0	0	0	0	0	0	0
16	1	6	0	0	0	0	0	1	1	1	1	0	0	0	0	0	0	0	0	0	0	0	0	0	0	0	0	0	0	0	0	0	0	0	0	0	0
17	2	6	0	0	0	0	2	1	1	1	1	0	0	0	0	0	0	0	0	0	0	0	0	0	0	0	0	0	0	0	0	0	0	0	0	0	0
18	1	6	0	0	0	0	0	1	1	1	1	1	0	0	0	0	0	0	0	0	0	0	0	0	0	0	0	0	0	0	0	0	0	0	0	0	0
19		6	0	0	0	0	0	0	0	0	0	0	0	0	0	0	0	0	0	0	0	0	0	0	0	0	0	0	0	0	0	0	0	0	0	0	0
20	1	6	0	0	0	0	0	0	0	0	1	1	0	0	0	0	0	0	0	0	0	0	0	0	0	0	0	0	0	0	0	0	0	0	0	0	0
25		6	0	0	0	0
26		6	0	0	0	0
27		6	0	0	0	0
28	1	6	0	0	0	1
37		6	0	0	0	0	0	0	0
38	1	6	0	0	0	1	0	0	0
39		6	0	0	0	0	0	0	0
40	1	6	0	0	1	1	1	0	0
41	1	6	0	0	0	1	1	0	0
42	1	6	0	0	0	1	1	0	0
43	1	6	0	0	0	0	1	0	0
44	1	6	0	0	0	1	1	0	0
53		6	0	0	0	0	0	0	0	0	0	0	0	0	0	0	0
54		6	0	0	0	0	0	0	0	0	0	0	0	0	0	0	0
55		6	0	0	0	0	0	0	0	0	0	0	0	0	0	0	0
56		6	0	0	0	0	0	0	0	0	0	0	0	0	0	0	0
57		6	0	0	0	0	0	0	0	0	0	0	0	0	0	0	0
58	1	6	0	0	0	1	1	1	0	0	0	0	0	0	0	0	0
59		6	0	0	0	0	0	0	0	0	0	0	0	0	0	0	0
60	1	6	0	0	0	0	1	1	1	0	0	0	0	0	0	0	0
69		6	0	0
70		6	0	0
71		6	0	0
72		6	0	0
73		6	0	0
74		6	0	0
75		6	0	0
76		6	0	0
85		6	0	0	0	0	0	0	0	0	0	0	0	0	0	0	0	0	0	0	0	0	0	0	0	0	0	0	0
86		6	0	0	0	0	0	0	0	0	0	0	0	0	0	0	0	0	0	0	0	0	0	0	0	0	0	0	0
87	1	6	0	0	0	0	1	0	0	0	0	0	0	0	0	0	0	0	0	0	0	0	0	0	0	0	0	0	0
88		6	0	0	0	0	0	0	0	0	0	0	0	0	0	0	0	0	0	0	0	0	0	0	0	0	0	0	0
89	1	6	0	0	0	0	1	0	0	0	0	0	0	0	0	0	0	0	0	0	0	0	0	0					0
90	1	6	0	0	0	0	0	1	0	0	0	0	0	0	0	0	0	0	0	0	0	0	0	0	0	0	0	0	0
91		6	0	0	0	0	0	0	0	0	0	0	0	0	0	0	0	0	0	0	0	0	0	0	0	0	0	0	0
92		6	0	0	0	0	0	0	0	0	0	0	0	0	0	0	0	0	0	0	0	0	0	0	0	0	0	0	0
97		6	0	0	0	0
98		6	0	0	0	0
99		6	0	0	0	0
100		6	0	0	0	0
109		6	0	0	0	0	0	0	0	0	0	0	0	0	0	0	0	0	0	0	0	0	0	0	0
110		6	0	0	0	0	0	0	0	0	0	0	0	0	0	0	0	0	0	0	0	0	0	0	0
111		6	0	0	0	0	0	0	0	0	0	0	0	0	0	0	0	0	0	0	0	0	0	0	0
112		6	0	0	0	0	0	0	0	0	0	0	0	0	0	0	0	0	0	0	0	0	0	0	0
113		6	0	0	0	0	0	0	0	0	0	0	0	0	0	0	0	0	0	0	0	0	0	0	0
114		6	0	0	0	0	0	0	0	0	0	0	0	0	0	0	0	0	0	0	0	0	0	0	0
115	1	6	0	0	0	1	0	0	0	0	0	0	0	0	0	0	0	0	0	0	0	0	0	0	0
116		6	0	0	0	0	0	0	0	0	0	0	0	0	0	0	0	0	0	0	0	0	0	0	0
Score in der Kategorie “Oberer Respirationstrakt”
Score 1
Score 2
Score 3
