# Supplementary material for: Respiratory long COVID in aged hamsters features impaired lung function post-exercise with bronchiolization and fibrosis
Source: Nat Commun. 2025 Feb 28;16:2080. doi: 10.1038/s41467-025-57267-x (PMC11871369; doi:10.1038/s41467-025-57267-x)
Supplement: Supplementary file 4 — Supplementary Data 2 [file 41467_2025_57267_MOESM4_ESM.xlsx]

## Sheet: SARS_1 vs MOCK_1
ENSEMBLE_ID	SYMBOL	StartPos	EndPos	ENTREZID	DESCRIPTION	TYPE	go_id	go_names	MAUR_Symbol	MAUR_ENTREZID	HumanGeneID	HumanSymbol	HUMAN_ENTREZID	baseMean	log2FoldChange	lfcSE	stat	pvalue	padj
ENSMAUG00000000006	ND1	2739	3693	8457936	NADH dehydrogenase subunit 1 [Source:NCBI gene;Acc:8457936]	protein_coding			ND1	8457936	ENSG00000198888	MT-ND1	4535	70516.6	0.255745	0.167737	1.52468	0.127338	0.579549
ENSMAUG00000000010	ND2	3902	4934	8457924	NADH dehydrogenase subunit 2 [Source:NCBI gene;Acc:8457924]	protein_coding			ND2	8457924	ENSG00000198763	MT-ND2	4536	77251.3	0.346537	0.198991	1.74147	0.081601	0.540667
ENSMAUG00000000016	COX1	5310	6854	8457925	cytochrome c oxidase subunit I [Source:NCBI gene;Acc:8457925]	protein_coding			COX1	8457925	ENSG00000198804	MT-CO1	4512	227582	0.322885	0.185235	1.74312	0.0813134	0.540667
ENSMAUG00000000019	COX2	6997	7680	8457926	cytochrome c oxidase subunit II [Source:NCBI gene;Acc:8457926]	protein_coding			COX2	8457926	ENSG00000198712	MT-CO2	4513	85582.7	-0.00371915	0.185255	-0.0200759	0.983983	0.994257
ENSMAUG00000000021	ATP8	7748	7951	8457927	ATP synthase F0 subunit 8 [Source:NCBI gene;Acc:8457927]	protein_coding			ATP8	8457927	ENSG00000228253	MT-ATP8	4509	15178.4	0.620938	0.351869	1.76468	0.077617	0.537298
ENSMAUG00000000022	ATP6	7909	8589	8457928	ATP synthase F0 subunit 6 [Source:NCBI gene;Acc:8457928]	protein_coding			ATP6	8457928	ENSG00000198899	MT-ATP6	4508	144626	0.168082	0.18194	0.923829	0.355575	0.695917
ENSMAUG00000000023	COX3	8589	9372	8457929	cytochrome c oxidase subunit III [Source:NCBI gene;Acc:8457929]	protein_coding			COX3	8457929	ENSG00000198938	MT-CO3	4514	119883	0.153302	0.152825	1.00312	0.315803	0.676784
ENSMAUG00000000025	ND3	9442	9789	8457930	NADH dehydrogenase subunit 3 [Source:NCBI gene;Acc:8457930]	protein_coding			ND3	8457930	ENSG00000198840	MT-ND3	4537	12596.5	0.0386205	0.163259	0.236559	0.812999	0.921322
ENSMAUG00000000027	ND4L	9860	10156	8457931	NADH dehydrogenase subunit 4L [Source:NCBI gene;Acc:8457931]	protein_coding			ND4L	8457931	ENSG00000212907	MT-ND4L	4539	4591.61	0.948902	0.476585	1.99104	0.0464761	0.491286
ENSMAUG00000000028	ND4	10150	11527	8457932	NADH dehydrogenase subunit 4 [Source:NCBI gene;Acc:8457932]	protein_coding			ND4	8457932	ENSG00000198886	MT-ND4	4538	69078.4	0.349118	0.205984	1.69488	0.0900991	0.552693
ENSMAUG00000000032	ND5	11723	13543	8457933	NADH dehydrogenase subunit 5 [Source:NCBI gene;Acc:8457933]	protein_coding			ND5	8457933	ENSG00000198786	MT-ND5	4540	55537.1	0.643181	0.312271	2.05969	0.0394281	0.478277
ENSMAUG00000000033	ND6	13527	14051	8457934	NADH dehydrogenase subunit 6 [Source:NCBI gene;Acc:8457934]	protein_coding			ND6	8457934	ENSG00000198695	MT-ND6	4541	36312.7	0.0831887	0.166138	0.50072	0.616568	0.833633
ENSMAUG00000000035	CYTB	14125	15265	8457935	cytochrome b [Source:NCBI gene;Acc:8457935]	protein_coding			CYTB	8457935	ENSG00000198727	MT-CYB	4519	120514	0.269411	0.210247	1.28141	0.200051	0.619155
ENSMAUG00000000040	Epha7	1077655	1238642	101840973	ephrin type-A receptor 7 [Source:NCBI gene;Acc:101840973]	protein_coding			Epha7	101840973	ENSG00000135333	EPHA7	2045	277.787	0.242347	0.333283	0.727152	0.467133	0.75503
ENSMAUG00000000041	Tnfsf15	12005522	12022048	101839302	TNF superfamily member 15 [Source:NCBI gene;Acc:101839302]	protein_coding			Tnfsf15	101839302	ENSG00000181634	TNFSF15	9966	10.7376	0.860518	0.58244	1.47744	0.139559	0.588021
ENSMAUG00000000042	Rnf32	377955	413241	101831261	ring finger protein 32 [Source:NCBI gene;Acc:101831261]	protein_coding			Rnf32	101831261	ENSG00000105982	RNF32	140545	452.419	0.089815	0.212426	0.422805	0.672437	0.857739
ENSMAUG00000000044	Nectin3	4541799	4592880	101843601	nectin cell adhesion molecule 3 [Source:NCBI gene;Acc:101843601]	protein_coding			Nectin3	101843601	ENSG00000177707	NECTIN3	25945	1197.28	0.464443	0.281682	1.64882	0.0991849	0.562151
ENSMAUG00000000045	Mospd1	145929	156339	101841848	motile sperm domain containing 1 [Source:NCBI gene;Acc:101841848]	protein_coding			Mospd1	101841848	ENSG00000101928	MOSPD1	56180	640.607	0.132309	0.130083	1.01711	0.3091	0.674542
ENSMAUG00000000047	Palmd	1701892	1749804	101842170	palmdelphin [Source:NCBI gene;Acc:101842170]	protein_coding			Palmd	101842170	ENSG00000099260	PALMD	54873	1020.57	0.112144	0.188309	0.595533	0.551487	0.801697
ENSMAUG00000000048	Tmem47	766013	790609	101835650	transmembrane protein 47 [Source:NCBI gene;Acc:101835650]	protein_coding			Tmem47	101835650	ENSG00000147027	TMEM47	83604	1657.23	0.175487	0.280748	0.625071	0.531924	0.789402
ENSMAUG00000000050	HLA-E	363827	366084			protein_coding					ENSG00000204592	HLA-E	3133	7951.23	-0.189311	0.227965	-0.830438	0.406291	0.722765
ENSMAUG00000000051	Snrpn	52720	62217	101833213	small nuclear ribonucleoprotein polypeptide N [Source:NCBI gene;Acc:101833213]	protein_coding			Snrpn	101833213	ENSG00000128739	SNRPN	6638	5758.05	-0.212047	0.146614	-1.44629	0.148096	0.594745
ENSMAUG00000000052	Hmgcs1	5579682	5599688	101839941	3-hydroxy-3-methylglutaryl-CoA synthase 1 [Source:NCBI gene;Acc:101839941]	protein_coding			Hmgcs1	101839941	ENSG00000112972	HMGCS1	3157	4738.06	-0.0829183	0.18613	-0.445485	0.65597	0.850138
ENSMAUG00000000053	Rmi2	2985335	2992094	101828849	RecQ mediated genome instability 2 [Source:NCBI gene;Acc:101828849]	protein_coding			Rmi2	101828849	ENSG00000175643	RMI2	116028	59.902	-0.524644	0.550839	-0.952445	0.340871	0.689441
ENSMAUG00000000054	Trim15	413872	420501	106022647	tripartite motif containing 15 [Source:NCBI gene;Acc:106022647]	protein_coding			Trim15	106022647	ENSG00000204610	TRIM15	89870	395.262	0.428064	0.165587	2.58513	0.00973419	0.304525
ENSMAUG00000000058	Gtpbp8	2955770	2965437	101840107	GTP binding protein 8 (putative) [Source:NCBI gene;Acc:101840107]	protein_coding			Gtpbp8	101840107	ENSG00000163607	GTPBP8	29083	589.29	0.0875237	0.113996	0.767776	0.44262	0.741619
ENSMAUG00000000062	Serpinb2	2306237	2315513	101831425	serpin family B member 2 [Source:NCBI gene;Acc:101831425]	protein_coding			Serpinb2	101831425	ENSG00000197632	SERPINB2	5055	116.991	1.37944	0.505433	2.72922	0.0063485	0.257974
ENSMAUG00000000063	Ces2h	347984	363979	101842264	pyrethroid hydrolase Ces2e [Source:NCBI gene;Acc:101842264]	protein_coding								31.0453	0.0912406	0.495121	0.184279	0.853794	0.939506
ENSMAUG00000000064	Lratd1	3213287	3215808	101837555	LRAT domain containing 1 [Source:NCBI gene;Acc:101837555]	protein_coding			Lratd1	101837555	ENSG00000162981	LRATD1	151354	564.479	0.499697	0.284647	1.7555	0.0791736	0.539252
ENSMAUG00000000065	Zfp438	1297229	1336181	101840423	zinc finger protein 438 [Source:NCBI gene;Acc:101840423]	protein_coding			Zfp438	101840423	ENSG00000183621	ZNF438	220929	352.491	0.211847	0.110949	1.90941	0.0562091	0.511409
ENSMAUG00000000066	Dach1	36658	265524		dachshund family transcription factor 1 [Source:MGI Symbol;Acc:MGI:1277991]	protein_coding			Dach1		ENSG00000276644	DACH1	1602	501.561	-0.00265053	0.380404	-0.00696767	0.994441	0.998101
ENSMAUG00000000067	Pdss1	268880	313377	101833540	decaprenyl diphosphate synthase subunit 1 [Source:NCBI gene;Acc:101833540]	protein_coding			Pdss1	101833540	ENSG00000148459	PDSS1	23590	65.3052	0.404335	0.235854	1.71434	0.0864658	0.548746
ENSMAUG00000000068	Zc3h4	1276517	1310341	101826232	zinc finger CCCH-type containing 4 [Source:NCBI gene;Acc:101826232]	protein_coding			Zc3h4	101826232	ENSG00000130749	ZC3H4	23211	4401.56	0.158311	0.101408	1.56113	0.118494	0.574587
ENSMAUG00000000070	TRO	295109	304323			protein_coding					ENSG00000067445	TRO	7216	26.9013	0.666382	0.418869	1.59091	0.11163	0.569642
ENSMAUG00000000071	Tigd2	1035028	1038108	101829354	tigger transposable element derived 2 [Source:NCBI gene;Acc:101829354]	protein_coding			Tigd2	101829354	ENSG00000180346	TIGD2	166815	752.153	0.214531	0.0910871	2.35523	0.0185113	0.382984
ENSMAUG00000000073	Them6	2783726	2786894	101841847	thioesterase superfamily member 6 [Source:NCBI gene;Acc:101841847]	protein_coding			Them6	101841847	ENSG00000130193	THEM6	51337	2275.7	-0.113521	0.167085	-0.679419	0.496872	0.774175
ENSMAUG00000000074	Snurf	62214	74836	106020718	SNRPN upstream reading frame [Source:NCBI gene;Acc:106020718]	protein_coding								1805.22	-0.0842948	0.127142	-0.662998	0.507332	0.778878
ENSMAUG00000000078	Rad21	2613810	2636911	101835161	RAD21 cohesin complex component [Source:NCBI gene;Acc:101835161]	protein_coding			Rad21	101835161	ENSG00000164754	RAD21	5885	6127.91	0.070059	0.162563	0.430965	0.666494	0.854613
ENSMAUG00000000079	Retreg1	4756823	4888641	101835966	reticulophagy regulator 1 [Source:NCBI gene;Acc:101835966]	protein_coding			Retreg1	101835966	ENSG00000154153	RETREG1	54463	1711.12	0.300027	0.180972	1.65787	0.0973442	0.560662
ENSMAUG00000000081	Mterf4	10973611	10978041	101835693	mitochondrial transcription termination factor 4 [Source:NCBI gene;Acc:101835693]	protein_coding			Mterf4	101835693	ENSG00000122085	MTERF4	130916	440.934	-0.239339	0.131081	-1.82589	0.0678669	0.525807
ENSMAUG00000000082	Sh3rf1	5125456	5283446		SH3 domain containing ring finger 1 [Source:MGI Symbol;Acc:MGI:1913066]	protein_coding			Sh3rf1		ENSG00000154447	SH3RF1	57630	726.959	0.328941	0.354748	0.927251	0.353796	0.694797
ENSMAUG00000000083	Clcn1	4090033	4118871	101832571	chloride voltage-gated channel 1 [Source:NCBI gene;Acc:101832571]	protein_coding			Clcn1	101832571	ENSG00000188037	CLCN1	1180	12.4729	-0.941041	0.496007	-1.89723	0.0577971	0.514592
ENSMAUG00000000084	PTP4A2	614278	614768			protein_coding					ENSG00000184007	PTP4A2	8073	35.1393	0.102025	0.258093	0.395301	0.692621	0.867693
ENSMAUG00000000085	Mcm6	3358796	3384725	101844212	minichromosome maintenance complex component 6 [Source:NCBI gene;Acc:101844212]	protein_coding			Mcm6	101844212	ENSG00000076003	MCM6	4175	1493.6	-0.216147	0.10521	-2.05443	0.0399341	0.478277
ENSMAUG00000000087	Rab10	9483949	9536745	101824809	RAB10, member RAS oncogene family [Source:NCBI gene;Acc:101824809]	protein_coding			Rab10	101824809	ENSG00000084733	RAB10	10890	6209.9	0.260602	0.155376	1.67724	0.0934965	0.558742
ENSMAUG00000000088	Mx1	667660	683141		MX dynamin-like GTPase 1 [Source:MGI Symbol;Acc:MGI:97243]	protein_coding			Mx1		ENSG00000157601	MX1	4599	6427.8	2.45373	0.427935	5.73388	9.8158e-09	8.02169e-06
ENSMAUG00000000089	Cyria	1371767	1425163	101825336	CYFIP related Rac1 interactor A [Source:NCBI gene;Acc:101825336]	protein_coding			Cyria	101825336	ENSG00000197872	CYRIA	81553	516.53	0.151017	0.273305	0.55256	0.580565	0.816324
ENSMAUG00000000090	B3gnt9	523879	526546	101844573	UDP-GlcNAc:betaGal beta-1,3-N-acetylglucosaminyltransferase 9 [Source:NCBI gene;Acc:101844573]	protein_coding			B3gnt9	101844573	ENSG00000237172	B3GNT9	84752	1197.3	0.186185	0.18164	1.02502	0.305354	0.672132
ENSMAUG00000000092	Mgat4b	1642069	1651482	101829522	alpha-1,3-mannosyl-glycoprotein 4-beta-N-acetylglucosaminyltransferase B [Source:NCBI gene;Acc:101829522]	protein_coding			Mgat4b	101829522	ENSG00000161013	MGAT4B	11282	5075.35	-0.276852	0.136524	-2.02786	0.0425747	0.480479
ENSMAUG00000000095	Rwdd3	5855758	5868463	101836908	RWD domain containing 3 [Source:NCBI gene;Acc:101836908]	protein_coding			Rwdd3	101836908	ENSG00000122481	RWDD3	25950	223.062	0.0347204	0.1768	0.196382	0.844311	0.935731
ENSMAUG00000000096	Ptprd	249885	615072		protein tyrosine phosphatase, receptor type, D [Source:MGI Symbol;Acc:MGI:97812]	protein_coding			Ptprd		ENSG00000153707	PTPRD	5789	450.169	0.647545	0.504925	1.28246	0.199682	0.619155
ENSMAUG00000000097	Gas2	4514364	4636791	101829110	growth arrest specific 2 [Source:NCBI gene;Acc:101829110]	protein_coding			Gas2	101829110	ENSG00000148935	GAS2	2620	109.727	0.168945	0.184062	0.917871	0.358686	0.69733
ENSMAUG00000000099	Dnajc27	8741923	8763426	101844940	DnaJ heat shock protein family (Hsp40) member C27 [Source:NCBI gene;Acc:101844940]	protein_coding			Dnajc27	101844940	ENSG00000115137	DNAJC27	51277	907.982	-0.00731743	0.153627	-0.0476313	0.96201	0.985526
ENSMAUG00000000102	Cetn4	10909498	10912731	101840906	centrin-4 [Source:NCBI gene;Acc:101840906]	protein_coding								44.2866	0.15876	0.220484	0.720053	0.471492	0.757085
ENSMAUG00000000104	Gpr183	6900651	6912532	106021895	G protein-coupled receptor 183 [Source:NCBI gene;Acc:106021895]	protein_coding			Gpr183	106021895	ENSG00000169508	GPR183	1880	479.146	-0.0394355	0.171356	-0.230138	0.817984	0.923198
ENSMAUG00000000105	Dok5	6596	20354		docking protein 5 [Source:MGI Symbol;Acc:MGI:1924079]	protein_coding			Dok5		ENSG00000101134	DOK5	55816	16.6596	0.424737	0.573575	0.740508	0.458992	0.749784
ENSMAUG00000000106	KLHL42	46	3982		kelch-like 42 [Source:MGI Symbol;Acc:MGI:2444786]	protein_coding					ENSG00000087448	KLHL42	57542	48.1016	0.563649	0.307096	1.83542	0.0664437	0.525807
ENSMAUG00000000107	Bpifb6	1718403	1729314	101839518	BPI fold containing family B member 6 [Source:NCBI gene;Acc:101839518]	protein_coding			Bpifb6	101839518	ENSG00000167104	BPIFB6	128859	7.28275	-2.444	2.40838	-1.01479	0.310207	0.675013
ENSMAUG00000000108	Itgb8	2961259	3038131	101841399	integrin subunit beta 8 [Source:NCBI gene;Acc:101841399]	protein_coding			Itgb8	101841399	ENSG00000105855	ITGB8	3696	12.9109	2.40332	0.76671	3.13458	0.00172099	0.140643
ENSMAUG00000000109	Sowahb	4792573	4794087	101831735	sosondowah ankyrin repeat domain family member B [Source:NCBI gene;Acc:101831735]	protein_coding			Sowahb	101831735	ENSG00000186212	SOWAHB	345079	77.7492	0.445541	0.239243	1.8623	0.0625614	0.524211
ENSMAUG00000000110	Fzd6	12686361	12718866	101840460	frizzled class receptor 6 [Source:NCBI gene;Acc:101840460]	protein_coding			Fzd6	101840460	ENSG00000164930	FZD6	8323	1476.47	0.27467	0.285323	0.962662	0.335717	0.687072
ENSMAUG00000000111	Zc3h7a	3358838	3417515	101829927	zinc finger CCCH-type containing 7A [Source:NCBI gene;Acc:101829927]	protein_coding			Zc3h7a	101829927	ENSG00000122299	ZC3H7A	29066	3043.32	0.229401	0.110356	2.07873	0.0376423	0.475703
ENSMAUG00000000112	MT3	89528	90750		metallothionein 3 [Source:MGI Symbol;Acc:MGI:97173]	protein_coding					ENSG00000087250	MT3	4504	77.1211	-0.927385	0.838534	-1.10596	0.268744	0.652024
ENSMAUG00000000113	Gab3	772358	891397	101829581	GRB2 associated binding protein 3 [Source:NCBI gene;Acc:101829581]	protein_coding			Gab3	101829581	ENSG00000160219	GAB3	139716	181.594	-0.148737	0.202779	-0.73349	0.46326	0.751992
ENSMAUG00000000115	HNRNPA3	98153	99206			protein_coding					ENSG00000170144	HNRNPA3	220988	980.25	0.056579	0.151704	0.372957	0.70918	0.875341
ENSMAUG00000000117	Tbl1xr1	1533686	1596669	101831013	TBL1X receptor 1 [Source:NCBI gene;Acc:101831013]	protein_coding			Tbl1xr1	101831013	ENSG00000177565	TBL1XR1	79718	1123.71	0.580163	0.376448	1.54115	0.12328	0.577628
ENSMAUG00000000118	ERICH3	3279118	3350859	101841026	glutamate rich 3 [Source:NCBI gene;Acc:101841026]	protein_coding			Erich3	101841026	ENSG00000178965	ERICH3	127254	245.953	0.459468	0.434294	1.05797	0.290071	0.660562
ENSMAUG00000000119	DDX50	2755	14854	101834344	ATP-dependent RNA helicase DDX50 [Source:NCBI gene;Acc:101834344]	protein_coding				101834344	ENSG00000107625	DDX50	79009	1091.06	-0.0505677	0.130262	-0.388199	0.697869	0.870169
ENSMAUG00000000121	Fam122b	241779	264842	101842302	family with sequence similarity 122B [Source:NCBI gene;Acc:101842302]	protein_coding			Fam122b	101842302	ENSG00000156504	PABIR2	159090	264.805	0.158261	0.204086	0.775462	0.438067	0.740802
ENSMAUG00000000122	Acyp1	601749	606393	101832686	acylphosphatase 1 [Source:NCBI gene;Acc:101832686]	protein_coding								767.043	0.0112956	0.182983	0.0617303	0.950778	0.980719
ENSMAUG00000000123	Bzw2	6377496	6428100	101828469	basic leucine zipper and W2 domains 2 [Source:NCBI gene;Acc:101828469]	protein_coding			Bzw2	101828469	ENSG00000136261	BZW2	28969	1291.87	0.0133516	0.152783	0.0873897	0.930362	0.972335
ENSMAUG00000000124	Arhgef38	6041676	6139927	101841919	Rho guanine nucleotide exchange factor 38 [Source:NCBI gene;Acc:101841919]	protein_coding			Arhgef38	101841919	ENSG00000236699	ARHGEF38	54848	112.178	1.03863	0.706546	1.47001	0.141558	0.589447
ENSMAUG00000000125	Micos13	2141	3571	101830499	mitochondrial contact site and cristae organizing system subunit 13 [Source:NCBI gene;Acc:101830499]	protein_coding			Micos13	101830499	ENSG00000174917	MICOS13	125988	2246.87	-0.185141	0.162723	-1.13777	0.255217	0.642839
ENSMAUG00000000126	WTAP	1219075	1221119			protein_coding					ENSG00000146457	WTAP	9589	245.968	0.208843	0.14155	1.4754	0.140106	0.588021
ENSMAUG00000000127	Cpped1	408918	526241	101824133	calcineurin like phosphoesterase domain containing 1 [Source:NCBI gene;Acc:101824133]	protein_coding			Cpped1	101824133	ENSG00000103381	CPPED1	55313	735.512	0.0235687	0.236396	0.0996999	0.920583	0.968307
ENSMAUG00000000128	Cbr3	4202202	4209501		carbonyl reductase 3 [Source:MGI Symbol;Acc:MGI:1309992]	protein_coding			Cbr3		ENSG00000159231	CBR3	874	647.971	-0.100314	0.149576	-0.670657	0.502439	0.777251
ENSMAUG00000000129	Enkur	1522179	1548236	101836925	enkurin, TRPC channel interacting protein [Source:NCBI gene;Acc:101836925]	protein_coding			Enkur	101836925	ENSG00000151023	ENKUR	219670	603.313	0.140452	0.298912	0.469878	0.638442	0.842443
ENSMAUG00000000130	Abhd2	4678995	4763714	101823208	abhydrolase domain containing 2 [Source:NCBI gene;Acc:101823208]	protein_coding			Abhd2	101823208	ENSG00000140526	ABHD2	11057	3287.72	0.113839	0.276661	0.411475	0.680724	0.862101
ENSMAUG00000000131	Ccdc194	20784	24957	110339639	serine/threonine-protein kinase MRCK gamma [Source:NCBI gene;Acc:110339639]	protein_coding			Ccdc194	110339639	ENSG00000269720	CCDC194	110806280	11.8677	1.04996	0.491133	2.13783	0.0325303	0.464518
ENSMAUG00000000133	VAMP7	11693	42594	101826426	vesicle associated membrane protein 7 [Source:NCBI gene;Acc:101826426]	protein_coding				101826426	ENSG00000124333	VAMP7	6845	1451.89	0.195089	0.163916	1.19018	0.233976	0.630057
ENSMAUG00000000135	Gdf2	3654770	3659405	101826546	growth differentiation factor 2 [Source:NCBI gene;Acc:101826546]	protein_coding			Gdf2	101826546	ENSG00000263761	GDF2	2658	3.4219	-0.409797	1.48843	-0.275322	0.783069	0.907504
ENSMAUG00000000136	ADAM22	646181	826366			protein_coding					ENSG00000008277	ADAM22	53616	5.63173	1.22461	0.719906	1.70107	0.0889302	0.550805
ENSMAUG00000000137	Sh2d6	12918916	12930675	101823298	SH2 domain containing 6 [Source:NCBI gene;Acc:101823298]	protein_coding			Sh2d6	101823298	ENSG00000152292	SH2D6	284948	384.617	-0.420352	0.438296	-0.959061	0.337528	0.687437
ENSMAUG00000000138	Slc4a4	8507712	8721886		solute carrier family 4 (anion exchanger), member 4 [Source:MGI Symbol;Acc:MGI:1927555]	protein_coding								105.146	1.21836	0.583449	2.0882	0.0367799	0.474619
ENSMAUG00000000139	Map9	12003241	12032216	101831323	microtubule associated protein 9 [Source:NCBI gene;Acc:101831323]	protein_coding			Map9	101831323	ENSG00000164114	MAP9	79884	128.505	0.415089	0.314779	1.31867	0.18728	0.614558
ENSMAUG00000000140	TTC14	14329402	14338824			protein_coding					ENSG00000163728	TTC14	151613	946.944	0.259628	0.145673	1.78226	0.0747066	0.535541
ENSMAUG00000000141	4833420G17Rik	5480238	5496912	101839413	chromosome unknown C5orf34 homolog [Source:NCBI gene;Acc:101839413]	protein_coding			4833420G17Rik	101839413	ENSG00000172244	C5orf34	375444	32.8206	0.206071	0.275999	0.746638	0.455282	0.747782
ENSMAUG00000000142	Tlr1	4683435	4690206	101829979	toll like receptor 1 [Source:NCBI gene;Acc:101829979]	protein_coding			Tlr1	101829979	ENSG00000174125	TLR1	7096	390.121	0.0227289	0.374239	0.0607335	0.951571	0.980995
ENSMAUG00000000143	Pcdh9	4079295	4928337	101835281	protocadherin 9 [Source:NCBI gene;Acc:101835281]	protein_coding			Pcdh9	101835281	ENSG00000184226	PCDH9	5101	11.9189	-0.240148	0.401805	-0.597673	0.550058	0.800965
ENSMAUG00000000144	Gtf2a1l	10159104	10196838	101834114	general transcription factor IIA subunit 1 like [Source:NCBI gene;Acc:101834114]	protein_coding			Gtf2a1l	101834114	ENSG00000242441	GTF2A1L	11036	47.6971	0.523923	0.394339	1.32861	0.183976	0.612769
ENSMAUG00000000145	Ptcd3	12284583	12314776	101844832	pentatricopeptide repeat domain 3 [Source:NCBI gene;Acc:101844832]	protein_coding			Ptcd3	101844832	ENSG00000132300	PTCD3	55037	1548.92	0.0320026	0.0774487	0.41321	0.679453	0.861526
ENSMAUG00000000146	DBN1	1656696	1671469	101829451	drebrin 1 [Source:NCBI gene;Acc:101829451]	protein_coding				101829451	ENSG00000113758	DBN1	1627	1638.35	0.0765163	0.17064	0.448407	0.65386	0.849072
ENSMAUG00000000147	Pdia4	994410	1014282	101834693	protein disulfide isomerase family A member 4 [Source:NCBI gene;Acc:101834693]	protein_coding			Pdia4	101834693	ENSG00000155660	PDIA4	9601	8672.22	-0.175838	0.153435	-1.14601	0.251791	0.64071
ENSMAUG00000000148	Ctse	142918	156800		cathepsin E [Source:MGI Symbol;Acc:MGI:107361]	protein_coding			Ctse		ENSG00000196188	CTSE	1510	47.8934	-0.019268	0.434488	-0.0443465	0.964628	0.98631
ENSMAUG00000000149	Dkk2	7037170	7131933	101843795	dickkopf WNT signaling pathway inhibitor 2 [Source:NCBI gene;Acc:101843795]	protein_coding			Dkk2	101843795	ENSG00000155011	DKK2	27123	203.054	0.631348	0.279686	2.25734	0.0239865	0.41845
ENSMAUG00000000153	Cd8a	11760749	11765220	101841812	CD8a molecule [Source:NCBI gene;Acc:101841812]	protein_coding			Cd8a	101841812	ENSG00000153563	CD8A	925	322.623	-0.183043	0.305045	-0.600053	0.548471	0.799922
ENSMAUG00000000155	HPRT1	482653	515832	101843724	hypoxanthine phosphoribosyltransferase 1 [Source:NCBI gene;Acc:101843724]	protein_coding				101843724	ENSG00000165704	HPRT1	3251	1513.79	0.0152622	0.0895745	0.170385	0.864707	0.944239
ENSMAUG00000000156	Dcaf12l1	6998084	7001727	101827067	DDB1- and CUL4-associated factor 12-like protein 1 [Source:NCBI gene;Acc:101827067]	protein_coding			Dcaf12l1	101827067	ENSG00000198354	DCAF12L2	340578	116.62	0.566189	0.450865	1.25578	0.209194	0.621679
ENSMAUG00000000158	Dhx36	6089000	6125390	101840573	DEAH-box helicase 36 [Source:NCBI gene;Acc:101840573]	protein_coding			Dhx36	101840573	ENSG00000174953	DHX36	170506	1804.47	0.118207	0.0628655	1.88032	0.0600647	0.518934
ENSMAUG00000000160	Inmt	917352	922239	101835859	indolethylamine N-methyltransferase [Source:NCBI gene;Acc:101835859]	protein_coding								31.4916	-0.0375255	0.319889	-0.117308	0.906616	0.963385
ENSMAUG00000000161	Zdhhc9	9675865	9714759	101830252	zinc finger DHHC-type palmitoyltransferase 9 [Source:NCBI gene;Acc:101830252]	protein_coding			Zdhhc9	101830252	ENSG00000188706	ZDHHC9	51114	1447.66	-0.0324316	0.125346	-0.258736	0.795839	0.911815
ENSMAUG00000000162	ZNF317	484188	488612			protein_coding					ENSG00000130803	ZNF317	57693	130.761	0.743545	0.285327	2.60594	0.00916218	0.299838
ENSMAUG00000000163	Zfp354b	961633	975155	110339204	zinc finger protein 354B [Source:NCBI gene;Acc:110339204]	protein_coding			Zfp354b	110339204	ENSG00000178338	ZNF354B	117608	183.72	0.225934	0.254034	0.889385	0.373796	0.706753
ENSMAUG00000000166	Cpsf3	477932	492585		cleavage and polyadenylation specificity factor 3 [Source:MGI Symbol;Acc:MGI:1859328]	protein_coding			Cpsf3		ENSG00000119203	CPSF3	51692	1046.01	-0.16627	0.143159	-1.16143	0.245467	0.636968
ENSMAUG00000000167	ACACB	2687639	2703010			protein_coding					ENSG00000076555	ACACB	32	54.7123	0.607399	0.496371	1.22368	0.221073	0.624661
ENSMAUG00000000168	Slc35a5	3312620	3330167	101830703	solute carrier family 35 member A5 [Source:NCBI gene;Acc:101830703]	protein_coding			Slc35a5	101830703	ENSG00000138459	SLC35A5	55032	729.072	0.317655	0.217164	1.46274	0.143538	0.59194
ENSMAUG00000000170	Zglp1	9125626	9130464	101834118	zinc finger GATA like protein 1 [Source:NCBI gene;Acc:101834118]	protein_coding			Zglp1	101834118	ENSG00000220201	ZGLP1	100125288	6.75345	0.233955	0.771958	0.303067	0.761839	0.898185
ENSMAUG00000000172	Arhgap35	1127822	1233036	101825449	Rho GTPase activating protein 35 [Source:NCBI gene;Acc:101825449]	protein_coding			Arhgap35	101825449	ENSG00000160007	ARHGAP35	2909	5936.83	0.169298	0.12613	1.34225	0.179515	0.61144
ENSMAUG00000000173	Ttc33	1769165	1795535		tetratricopeptide repeat domain 33 [Source:MGI Symbol;Acc:MGI:1914765]	protein_coding			Ttc33		ENSG00000113638	TTC33	23548	341.765	0.236567	0.205189	1.15292	0.248941	0.639577
ENSMAUG00000000174	Gprin3	1169428	1238113	101829623	GPRIN family member 3 [Source:NCBI gene;Acc:101829623]	protein_coding			Gprin3	101829623	ENSG00000185477	GPRIN3	285513	155.188	0.352966	0.225706	1.56383	0.117857	0.573307
ENSMAUG00000000176	PHF3	3808934	3814365			protein_coding					ENSG00000118482	PHF3	23469	123.726	0.417029	0.415517	1.00364	0.315553	0.676784
ENSMAUG00000000178	Cip2a	6859895	6886143	101823736	cellular inhibitor of PP2A [Source:NCBI gene;Acc:101823736]	protein_coding			Cip2a	101823736	ENSG00000163507	CIP2A	57650	66.6402	0.199534	0.321051	0.621504	0.534268	0.791509
ENSMAUG00000000179	Zfp879	1049663	1056311	101834806	zinc finger protein 879 [Source:NCBI gene;Acc:101834806]	protein_coding			Zfp879	101834806	ENSG00000234284	ZNF879	345462	57.1461	0.284781	0.237028	1.20147	0.229571	0.628258
ENSMAUG00000000180	Dapk1	6972986	7122709	101842450	death associated protein kinase 1 [Source:NCBI gene;Acc:101842450]	protein_coding			Dapk1	101842450	ENSG00000196730	DAPK1	1612	3838.23	-0.0265265	0.198353	-0.133734	0.893613	0.958507
ENSMAUG00000000182	Fras1	3415495	3662509		Fraser extracellular matrix complex subunit 1 [Source:MGI Symbol;Acc:MGI:2385368]	protein_coding			Fras1		ENSG00000138759	FRAS1	80144	333.093	0.771589	0.454147	1.69899	0.0893219	0.551307
ENSMAUG00000000183	WDR31	13342272	13348694			protein_coding					ENSG00000148225	WDR31	114987	167.813	0.459744	0.286512	1.60462	0.108577	0.568991
ENSMAUG00000000185	Tmem156	4535525	4570895		transmembrane protein 156 [Source:MGI Symbol;Acc:MGI:2685292]	protein_coding			Tmem156		ENSG00000121895	TMEM156	80008	137.587	-0.112429	0.208713	-0.538676	0.59011	0.820646
ENSMAUG00000000186	Hlcs	3661047	3826792	101825408	holocarboxylase synthetase [Source:NCBI gene;Acc:101825408]	protein_coding			Hlcs	101825408	ENSG00000159267	HLCS	3141	549.286	0.212367	0.265486	0.799918	0.423758	0.733006
ENSMAUG00000000187	PHF3	3832406	3866130			protein_coding					ENSG00000118482	PHF3	23469	74.0678	0.608798	0.66826	0.911019	0.362285	0.699664
ENSMAUG00000000192	Ank	6386336	6439540		progressive ankylosis [Source:MGI Symbol;Acc:MGI:3045421]	protein_coding			Ank		ENSG00000154122	ANKH	56172	1562.22	0.230205	0.237454	0.96947	0.332311	0.686645
ENSMAUG00000000196	Rgn	776612	789085	101828858	regucalcin [Source:NCBI gene;Acc:101828858]	protein_coding			Rgn	101828858	ENSG00000130988	RGN	9104	53.7979	0.259776	0.250973	1.03507	0.300634	0.668174
ENSMAUG00000000197	Mesd	4822	11416	101843121	mesoderm development LRP chaperone [Source:NCBI gene;Acc:101843121]	protein_coding			Mesd	101843121	ENSG00000117899	MESD	23184	4090	-0.0662401	0.0658538	-1.00587	0.31448	0.676784
ENSMAUG00000000198	Cds1	1482797	1551237		CDP-diacylglycerol synthase 1 [Source:MGI Symbol;Acc:MGI:1921846]	protein_coding			Cds1		ENSG00000163624	CDS1	1040	1196.19	0.407773	0.175465	2.32396	0.0201275	0.398883
ENSMAUG00000000199	Phf6	539216	583395	101824841	PHD finger protein 6 [Source:NCBI gene;Acc:101824841]	protein_coding			Phf6	101824841	ENSG00000156531	PHF6	84295	106.603	0.743042	0.56393	1.31761	0.187633	0.614558
ENSMAUG00000000200	Kctd10	2864596	2887182	101823576	potassium channel tetramerization domain containing 10 [Source:NCBI gene;Acc:101823576]	protein_coding			Kctd10	101823576	ENSG00000110906	KCTD10	83892	7688.1	-0.117319	0.132673	-0.884278	0.376546	0.708402
ENSMAUG00000000201	Tjap1	10526856	10552405	101843215	tight junction associated protein 1 [Source:NCBI gene;Acc:101843215]	protein_coding			Tjap1	101843215	ENSG00000137221	TJAP1	93643	1990.59	-0.181612	0.0964073	-1.8838	0.0595921	0.518285
ENSMAUG00000000202	MLF1	231137	231865			protein_coding					ENSG00000178053	MLF1	4291	56.1478	0.482086	0.367116	1.31317	0.189126	0.614558
ENSMAUG00000000203	Mctp2	2302064	2523079	101842652	multiple C2 and transmembrane domain containing 2 [Source:NCBI gene;Acc:101842652]	protein_coding			Mctp2	101842652	ENSG00000140563	MCTP2	55784	491.814	0.330947	0.274383	1.20615	0.22776	0.626904
ENSMAUG00000000207	SATB1	15995418	16041467			protein_coding					ENSG00000182568	SATB1	6304	700.401	0.275525	0.224333	1.2282	0.219373	0.622849
ENSMAUG00000000209	Ubtd2	73077	120338	101830401	ubiquitin domain containing 2 [Source:NCBI gene;Acc:101830401]	protein_coding			Ubtd2	101830401	ENSG00000168246	UBTD2	92181	490.012	0.278669	0.181509	1.53529	0.124712	0.577628
ENSMAUG00000000211	RPL29	1340608	1341072			protein_coding					ENSG00000162244	RPL29	6159	558.907	-0.287478	0.163741	-1.75568	0.0791427	0.539252
ENSMAUG00000000212	Tmem144	9522405	9553037	101827683	transmembrane protein 144 [Source:NCBI gene;Acc:101827683]	protein_coding			Tmem144	101827683	ENSG00000164124	TMEM144	55314	227.28	0.0669999	0.171964	0.389615	0.696821	0.869651
ENSMAUG00000000214	MBD5	9590265	9633392			protein_coding					ENSG00000204406	MBD5	55777	251.538	0.544145	0.394311	1.37999	0.16759	0.607366
ENSMAUG00000000215	Mlec	3595797	3605782	101830456	malectin [Source:NCBI gene;Acc:101830456]	protein_coding			Mlec	101830456	ENSG00000110917	MLEC	9761	908.286	0.210731	0.24288	0.867633	0.385595	0.713628
ENSMAUG00000000216	Thyn1	3450969	3459514	101840837	thymocyte nuclear protein 1 [Source:NCBI gene;Acc:101840837]	protein_coding			Thyn1	101840837	ENSG00000151500	THYN1	29087	310.979	-0.0335931	0.12682	-0.264887	0.791097	0.910189
ENSMAUG00000000217	TRIP12	5131352	5137943			protein_coding					ENSG00000153827	TRIP12	9320	1238.95	0.277552	0.19274	1.44003	0.149858	0.595491
ENSMAUG00000000218	Gnb1l	7179645	7207013	101834117	G protein subunit beta 1 like [Source:NCBI gene;Acc:101834117]	protein_coding			Gnb1l	101834117	ENSG00000185838	GNB1L	54584	155.185	-0.263862	0.136493	-1.93315	0.0532182	0.50972
ENSMAUG00000000219	Hbb-bh1	36760	38187	101840613	hemoglobin subunit beta-Z-like [Source:NCBI gene;Acc:101840613]	protein_coding								5656.94	1.20415	0.496611	2.42473	0.01532	0.357142
ENSMAUG00000000220	Nosip	907	1890	101842775	nitric oxide synthase interacting protein [Source:NCBI gene;Acc:101842775]	protein_coding			Nosip	101842775	ENSG00000142546	NOSIP	51070	1745.46	-0.309401	0.169587	-1.82444	0.0680852	0.526287
ENSMAUG00000000222	Gltp	3165412	3184893	101826984	glycolipid transfer protein [Source:NCBI gene;Acc:101826984]	protein_coding			Gltp	101826984	ENSG00000139433	GLTP	51228	2679.48	-0.0712559	0.0891379	-0.79939	0.424064	0.733104
ENSMAUG00000000223	Rimbp3	8593056	8597885	101824889	RIMS-binding protein 3-like [Source:NCBI gene;Acc:101824889]	protein_coding								6.89578	0.0295588	0.51475	0.0574236	0.954208	0.982253
ENSMAUG00000000224	Cryba4	847208	852002	101839755	crystallin beta A4 [Source:NCBI gene;Acc:101839755]	protein_coding			Cryba4	101839755	ENSG00000196431	CRYBA4	1413	191.202	-0.521993	0.352477	-1.48093	0.138626	0.58708
ENSMAUG00000000225	Tmem89	15	1905	101838468	transmembrane protein 89 [Source:NCBI gene;Acc:101838468]	protein_coding			Tmem89	101838468	ENSG00000183396	TMEM89	440955	18.5515	-0.190619	0.473962	-0.402183	0.68755	0.865044
ENSMAUG00000000226	Arsi	12795523	12801717	101841005	arylsulfatase family member I [Source:NCBI gene;Acc:101841005]	protein_coding			Arsi	101841005	ENSG00000183876	ARSI	340075	328.732	0.386765	0.241636	1.60061	0.109464	0.568991
ENSMAUG00000000227	Prrg1	386393	432483	101843558	proline rich and Gla domain 1 [Source:NCBI gene;Acc:101843558]	protein_coding			Prrg1	101843558	ENSG00000130962	PRRG1	5638	389.793	0.315592	0.277967	1.13536	0.256226	0.64319
ENSMAUG00000000228	Spice1	2560228	2618582	101839128	spindle and centriole associated protein 1 [Source:NCBI gene;Acc:101839128]	protein_coding								920.277	0.0394125	0.0725867	0.542971	0.58715	0.819448
ENSMAUG00000000229	Trim69	4487	10794	101832776	tripartite motif containing 69 [Source:NCBI gene;Acc:101832776]	protein_coding			Trim69	101832776	ENSG00000185880	TRIM69	140691	10.3203	1.2429	0.565709	2.19706	0.0280159	0.445528
ENSMAUG00000000230	Ribc1	1371012	1375881	101837028	RIB43A domain with coiled-coils 1 [Source:NCBI gene;Acc:101837028]	protein_coding			Ribc1	101837028	ENSG00000158423	RIBC1	158787	135.254	0.0826268	0.322197	0.256448	0.797605	0.912275
ENSMAUG00000000232	Gucy1b1	11705543	11750012	101831059	guanylate cyclase 1 soluble subunit beta 1 [Source:NCBI gene;Acc:101831059]	protein_coding			Gucy1b1	101831059	ENSG00000061918	GUCY1B1	2983	1980.94	-0.0757685	0.351691	-0.21544	0.829424	0.927221
ENSMAUG00000000234	Foxo1	3069468	3144161	101827069	forkhead box O1 [Source:NCBI gene;Acc:101827069]	protein_coding			Foxo1	101827069	ENSG00000150907	FOXO1	2308	609.513	0.533318	0.501344	1.06378	0.287429	0.660562
ENSMAUG00000000235	Ccdc113	1345643	1374249	101833178	coiled-coil domain containing 113 [Source:NCBI gene;Acc:101833178]	protein_coding			Ccdc113	101833178	ENSG00000103021	CCDC113	29070	855.96	0.0933212	0.307693	0.303293	0.761667	0.8981
ENSMAUG00000000236	Btc	6362067	6400091	101836964	betacellulin [Source:NCBI gene;Acc:101836964]	protein_coding			Btc	101836964	ENSG00000174808	BTC	685	116.945	0.437229	0.22041	1.98371	0.0472879	0.494713
ENSMAUG00000000237	Klf8	623060	649892	101844258	Kruppel like factor 8 [Source:NCBI gene;Acc:101844258]	protein_coding			Klf8	101844258	ENSG00000102349	KLF8	11279	30.916	1.08009	0.832792	1.29696	0.194647	0.616497
ENSMAUG00000000239	Ptpn12	2978758	3022486	101827081	protein tyrosine phosphatase non-receptor type 12 [Source:NCBI gene;Acc:101827081]	protein_coding			Ptpn12	101827081	ENSG00000127947	PTPN12	5782	3380.54	0.217964	0.233707	0.932639	0.351006	0.694085
ENSMAUG00000000240	Zfp267	12036037	12050063	101836438	zinc finger protein 345-like [Source:NCBI gene;Acc:101836438]	protein_coding								249.705	-0.0534211	0.161928	-0.329906	0.741471	0.889311
ENSMAUG00000000242	Taf8	11700728	11711480	101829166	TATA-box binding protein associated factor 8 [Source:NCBI gene;Acc:101829166]	protein_coding			Taf8	101829166	ENSG00000137413	TAF8	129685	667.99	-0.165484	0.0832285	-1.98831	0.0467779	0.492141
ENSMAUG00000000243	FRMPD2	4074898	4087515			protein_coding					ENSG00000170324	FRMPD2	143162	212.484	0.28649	0.357053	0.802376	0.422335	0.732342
ENSMAUG00000000245	EBAG9	8122353	8139242	101836203	estrogen receptor binding site associated antigen 9 [Source:NCBI gene;Acc:101836203]	protein_coding				101836203	ENSG00000147654	EBAG9	9166	3050.65	-0.0408797	0.0605694	-0.674924	0.499724	0.775498
ENSMAUG00000000247	Slc6a14	887013	939251	101831822	solute carrier family 6 member 14 [Source:NCBI gene;Acc:101831822]	protein_coding								425.388	0.522026	0.547473	0.953519	0.340327	0.688707
ENSMAUG00000000248	SGO2	156911	170920			protein_coding					ENSG00000163535	SGO2	151246	69.4766	0.245909	0.34863	0.70536	0.480586	0.762777
ENSMAUG00000000249	Helq	504865	553861		helicase, POLQ-like [Source:MGI Symbol;Acc:MGI:2176740]	protein_coding			Helq		ENSG00000163312	HELQ	113510	494.086	0.0859045	0.074733	1.14949	0.250356	0.639825
ENSMAUG00000000251	Sos1	15768569	15849115	101842876	SOS Ras/Rac guanine nucleotide exchange factor 1 [Source:NCBI gene;Acc:101842876]	protein_coding			Sos1	101842876	ENSG00000115904	SOS1	6654	1164.7	0.113306	0.176552	0.641771	0.521022	0.784872
ENSMAUG00000000253	Zfp266	9704472	9712233	101837265	zinc finger protein OZF [Source:NCBI gene;Acc:101837265]	protein_coding			Zfp266	101837265	ENSG00000174652	ZNF266	10781	257.333	0.703846	0.40137	1.75361	0.0794976	0.539252
ENSMAUG00000000254	CCNI	4649187	4668679			protein_coding					ENSG00000118816	CCNI	10983	5131.36	0.198694	0.161211	1.23251	0.21776	0.621869
ENSMAUG00000000257	Mmrn1	2186960	2233853	101830610	multimerin 1 [Source:NCBI gene;Acc:101830610]	protein_coding			Mmrn1	101830610	ENSG00000138722	MMRN1	22915	144.571	0.165424	0.302884	0.546164	0.584953	0.818402
ENSMAUG00000000258	Adamts2	1089085	1293166		a disintegrin-like and metallopeptidase (reprolysin type) with thrombospondin type 1 motif, 2 [Source:MGI Symbol;Acc:MGI:1347356]	protein_coding			Adamts2		ENSG00000087116	ADAMTS2	9509	884.453	0.178847	0.321359	0.556534	0.577846	0.814967
ENSMAUG00000000259	S1pr5	8942252	8947304	101843418	sphingosine-1-phosphate receptor 5 [Source:NCBI gene;Acc:101843418]	protein_coding			S1pr5	101843418	ENSG00000180739	S1PR5	53637	68.8454	-0.352821	0.368984	-0.956197	0.338973	0.688523
ENSMAUG00000000260	Malsu1	624232	632522	101840713	mitochondrial assembly of ribosomal large subunit 1 [Source:NCBI gene;Acc:101840713]	protein_coding			Malsu1	101840713	ENSG00000156928	MALSU1	115416	815.426	-0.0767485	0.122639	-0.62581	0.531439	0.789086
ENSMAUG00000000261	Fnbp1l	7229352	7284898		formin binding protein 1-like [Source:MGI Symbol;Acc:MGI:1925642]	protein_coding			Fnbp1l		ENSG00000137942	FNBP1L	54874	643.214	0.51458	0.550299	0.935091	0.349741	0.69344
ENSMAUG00000000262	Adgrl2	92561	263781		adhesion G protein-coupled receptor L2 [Source:MGI Symbol;Acc:MGI:2139714]	protein_coding			Adgrl2		ENSG00000117114	ADGRL2	23266	4131.44	-0.0382282	0.244463	-0.156376	0.875736	0.949184
ENSMAUG00000000263	Synpr	9625714	9954544	101834378	synaptoporin [Source:NCBI gene;Acc:101834378]	protein_coding			Synpr	101834378	ENSG00000163630	SYNPR	132204	26.5335	-0.86992	0.504032	-1.72592	0.0843614	0.54595
ENSMAUG00000000264	GNG8	1448	1881	101837670	G protein subunit gamma 8 [Source:NCBI gene;Acc:101837670]	protein_coding				101837670	ENSG00000167414	GNG8	94235	15.6032	-0.277311	0.445308	-0.62274	0.533456	0.790937
ENSMAUG00000000265	Cdh8	5011454	5403210		cadherin 8 [Source:MGI Symbol;Acc:MGI:107434]	protein_coding			Cdh8		ENSG00000150394	CDH8	1006	4.54541	1.67311	0.949734	1.76166	0.0781267	0.538288
ENSMAUG00000000268	Dtymk	10482771	10485504		deoxythymidylate kinase [Source:MGI Symbol;Acc:MGI:108396]	protein_coding			Dtymk		ENSG00000168393	DTYMK	1841	611.56	-0.09215	0.152546	-0.604081	0.54579	0.798359
ENSMAUG00000000269	Bnc1	7462587	7487328	101837263	basonuclin 1 [Source:NCBI gene;Acc:101837263]	protein_coding			Bnc1	101837263	ENSG00000169594	BNC1	646	266.492	1.43073	0.810787	1.76462	0.0776281	0.537298
ENSMAUG00000000270	Ankrd28	5864572	5952377		ankyrin repeat domain 28 [Source:MGI Symbol;Acc:MGI:2145661]	protein_coding			Ankrd28		ENSG00000206560	ANKRD28	23243	270.365	0.40029	0.349632	1.14489	0.252255	0.641173
ENSMAUG00000000271	ANKZF1	827	1597			protein_coding					ENSG00000163516	ANKZF1	55139	258.354	0.117338	0.157939	0.742937	0.45752	0.749206
ENSMAUG00000000273	Scrn1	1561836	1603502	101842972	secernin 1 [Source:NCBI gene;Acc:101842972]	protein_coding			Scrn1	101842972	ENSG00000136193	SCRN1	9805	157.462	0.081594	0.378944	0.215319	0.829518	0.927221
ENSMAUG00000000274	Rida	16282698	16293414	101835500	reactive intermediate imine deaminase A homolog [Source:NCBI gene;Acc:101835500]	protein_coding			Rida	101835500	ENSG00000132541	RIDA	10247	372.543	-0.0562623	0.154642	-0.363823	0.71599	0.877677
ENSMAUG00000000276	Kctd12b	894140	902663	101844788	BTB/POZ domain-containing protein KCTD12-like [Source:NCBI gene;Acc:101844788]	protein_coding								672.04	0.540167	0.217926	2.47867	0.0131875	0.337517
ENSMAUG00000000279	GRHL2	13967688	13975818			protein_coding					ENSG00000083307	GRHL2	79977	75.2125	0.198916	0.316366	0.628753	0.529511	0.788616
ENSMAUG00000000280	MPP1	716220	745360	101828965	membrane palmitoylated protein 1 [Source:NCBI gene;Acc:101828965]	protein_coding				101828965	ENSG00000130830	MPP1	4354	3418.8	0.0825437	0.12977	0.636077	0.524726	0.786181
ENSMAUG00000000281	PCYOX1L	415	5773	101841255	prenylcysteine oxidase 1 like [Source:NCBI gene;Acc:101841255]	protein_coding				101841255	ENSG00000145882	PCYOX1L	78991	877.636	-0.321378	0.125831	-2.55405	0.0106478	0.313259
ENSMAUG00000000283	Lpgat1	3238956	3287437	101839414	lysophosphatidylglycerol acyltransferase 1 [Source:NCBI gene;Acc:101839414]	protein_coding			Lpgat1	101839414	ENSG00000123684	LPGAT1	9926	2945.61	0.286793	0.143784	1.99461	0.0460857	0.490421
ENSMAUG00000000284	Casq2	2634035	2692668	101829540	calsequestrin 2 [Source:NCBI gene;Acc:101829540]	protein_coding			Casq2	101829540	ENSG00000118729	CASQ2	845	206.472	0.593872	0.431668	1.37576	0.168896	0.607567
ENSMAUG00000000285	Lancl2	159750	192778	101825229	lanC-like protein 2 [Source:NCBI gene;Acc:101825229]	protein_coding			Lancl2	101825229	ENSG00000132434	LANCL2	55915	155.37	0.413781	0.448151	0.923306	0.355848	0.696157
ENSMAUG00000000286	Spin2c	1029428	1031386	101822446	spindlin-2C [Source:NCBI gene;Acc:101822446]	protein_coding								34.9073	0.232153	0.409078	0.567502	0.570373	0.810803
ENSMAUG00000000287	C11orf58	139	753			protein_coding					ENSG00000110696	C11orf58	10944	851.452	0.10251	0.101468	1.01027	0.312366	0.676219
ENSMAUG00000000288	Ampd2	8649160	8661364	101830612	adenosine monophosphate deaminase 2 [Source:NCBI gene;Acc:101830612]	protein_coding			Ampd2	101830612	ENSG00000116337	AMPD2	271	3102.28	-0.0605007	0.156081	-0.387623	0.698295	0.870354
ENSMAUG00000000289	GPR52	9654	14507	101832775	G protein-coupled receptor 52 [Source:NCBI gene;Acc:101832775]	protein_coding				101832775	ENSG00000203737	GPR52	9293	8.41034	0.112032	0.49314	0.227182	0.820282	0.924625
ENSMAUG00000000290	Wwtr1	1866247	1990650	101833771	WW domain containing transcription regulator 1 [Source:NCBI gene;Acc:101833771]	protein_coding			Wwtr1	101833771	ENSG00000018408	WWTR1	25937	5813.71	0.0224758	0.2044	0.10996	0.912441	0.965965
ENSMAUG00000000291	Aifm1	9954630	9990773	101830708	apoptosis inducing factor mitochondria associated 1 [Source:NCBI gene;Acc:101830708]	protein_coding			Aifm1	101830708	ENSG00000156709	AIFM1	9131	1182.61	-0.0140614	0.0938722	-0.149793	0.880928	0.951313
ENSMAUG00000000292	Hpgds	6401173	6433588	101832464	hematopoietic prostaglandin D synthase [Source:NCBI gene;Acc:101832464]	protein_coding			Hpgds	101832464	ENSG00000163106	HPGDS	27306	118.881	0.291137	0.498701	0.58379	0.559361	0.805588
ENSMAUG00000000294	Prkce	7991196	8192502	101839221	protein kinase C epsilon [Source:NCBI gene;Acc:101839221]	protein_coding			Prkce	101839221	ENSG00000171132	PRKCE	5581	453.045	0.122118	0.598872	0.203913	0.838421	0.932963
ENSMAUG00000000295	Fndc4	6141318	6144297	101826100	fibronectin type III domain containing 4 [Source:NCBI gene;Acc:101826100]	protein_coding			Fndc4	101826100	ENSG00000115226	FNDC4	64838	895.956	0.0283361	0.243811	0.116221	0.907477	0.963895
ENSMAUG00000000297	Ghitm	625092	637912	101843071	growth hormone inducible transmembrane protein [Source:NCBI gene;Acc:101843071]	protein_coding			Ghitm	101843071	ENSG00000165678	GHITM	27069	8556.1	0.0350271	0.0547737	0.639488	0.522506	0.785253
ENSMAUG00000000298	Stk32a	16427326	16542130	101841171	serine/threonine kinase 32A [Source:NCBI gene;Acc:101841171]	protein_coding			Stk32a	101841171	ENSG00000169302	STK32A	202374	19.0565	1.10539	0.503438	2.19569	0.0281142	0.445647
ENSMAUG00000000299	Vsig10	5876742	5905822		V-set and immunoglobulin domain containing 10 [Source:MGI Symbol;Acc:MGI:2448533]	protein_coding			Vsig10		ENSG00000176834	VSIG10	54621	786.772	0.242874	0.260569	0.932094	0.351288	0.694363
ENSMAUG00000000300	Snx27	306554	392381	101837122	sorting nexin 27 [Source:NCBI gene;Acc:101837122]	protein_coding			Snx27	101837122	ENSG00000143376	SNX27	81609	3679.65	0.237609	0.117045	2.03007	0.0423499	0.480252
ENSMAUG00000000301	1810037I17Rik	7625153	7627029	101823832	chromosome unknown C4orf3 homolog [Source:NCBI gene;Acc:101823832]	protein_coding			1810037I17Rik	101823832	ENSG00000164096	C4orf3	401152	3389.73	0.0238291	0.0816732	0.291761	0.770469	0.901854
ENSMAUG00000000303	ARMC9	6081056	6171148			protein_coding					ENSG00000135931	ARMC9	80210	277.337	0.0234132	0.120853	0.193732	0.846385	0.93604
ENSMAUG00000000304	Tubb6	6469775	6480844	101829619	tubulin beta 6 class V [Source:NCBI gene;Acc:101829619]	protein_coding			Tubb6	101829619	ENSG00000176014	TUBB6	84617	7222.39	-0.0836319	0.165017	-0.506807	0.61229	0.831953
ENSMAUG00000000305	Tpte	72471	143877	101839447	phosphatidylinositol 3,4,5-trisphosphate 3-phosphatase TPTE2-like [Source:NCBI gene;Acc:101839447]	protein_coding								5.47947	-0.479482	0.601743	-0.796823	0.425554	0.734299
ENSMAUG00000000306	Sdr16c5	271277	281059	101823255	short chain dehydrogenase/reductase family 16C member 5 [Source:NCBI gene;Acc:101823255]	protein_coding			Sdr16c5	101823255	ENSG00000170786	SDR16C5	195814	256.553	0.321206	0.349585	0.918821	0.358189	0.696977
ENSMAUG00000000307	Nopchap1	3551968	3558454	101836400	chromosome unknown C12orf45 homolog [Source:NCBI gene;Acc:101836400]	protein_coding			Nopchap1	101836400	ENSG00000151131	NOPCHAP1	121053	467.016	-0.00686575	0.085138	-0.0806425	0.935726	0.974749
ENSMAUG00000000308	Chia1	6695039	6707132	101842885	acidic mammalian chitinase [Source:NCBI gene;Acc:101842885]	protein_coding			Chia1	101842885	ENSG00000134216	CHIA	27159	77.425	-0.126056	0.368337	-0.342229	0.732179	0.885428
ENSMAUG00000000309	Eif2ak2	14240217	14265087	101836026	eukaryotic translation initiation factor 2 alpha kinase 2 [Source:NCBI gene;Acc:101836026]	protein_coding			Eif2ak2	101836026	ENSG00000055332	EIF2AK2	5610	1203.1	1.85423	0.27102	6.84166	7.82806e-12	1.04683e-08
ENSMAUG00000000310	Ppan	9300049	9303772	101835697	suppressor of SWI4 1 homolog [Source:NCBI gene;Acc:101835697]	protein_coding								1546	-0.22247	0.167471	-1.32841	0.184043	0.612769
ENSMAUG00000000311	Pum2	4543881	4619009	101837268	pumilio RNA binding family member 2 [Source:NCBI gene;Acc:101837268]	protein_coding			Pum2	101837268	ENSG00000055917	PUM2	23369	5124.41	0.147138	0.150752	0.976026	0.329052	0.683762
ENSMAUG00000000312	Gk	3271147	3348246	101826822	glycerol kinase [Source:NCBI gene;Acc:101826822]	protein_coding								636.328	0.399145	0.282832	1.41125	0.158172	0.602563
ENSMAUG00000000313	Mroh2b	1504734	1574490	101828338	maestro heat like repeat family member 2B [Source:NCBI gene;Acc:101828338]	protein_coding			Mroh2b	101828338	ENSG00000171495	MROH2B	133558	4.71446	-0.0939727	0.959117	-0.0979783	0.921949	0.96883
ENSMAUG00000000314	ZNF330	1114787	1118775			protein_coding					ENSG00000109445	ZNF330	27309	653.858	0.0475225	0.114709	0.414289	0.678663	0.861526
ENSMAUG00000000316	PITX2	2710597	2726327	101826562	paired like homeodomain 2 [Source:NCBI gene;Acc:101826562]	protein_coding				101826562	ENSG00000164093	PITX2	5308	11.5332	0.911515	0.660965	1.37907	0.167874	0.607567
ENSMAUG00000000317	RPS18	82125	87020	101834509	ribosomal protein S18 [Source:NCBI gene;Acc:101834509]	protein_coding			Rps18-ps5	101834509	ENSG00000231500	RPS18	6222	23441.1	-0.221405	0.158163	-1.39986	0.161556	0.604249
ENSMAUG00000000318	Svip	4646631	4652819	106022247	small VCP interacting protein [Source:NCBI gene;Acc:106022247]	protein_coding			Svip	106022247	ENSG00000198168	SVIP	258010	204.827	0.590739	0.463744	1.27385	0.202718	0.619742
ENSMAUG00000000319	Ppp2r5a	3582990	3624530		protein phosphatase 2, regulatory subunit B', alpha [Source:MGI Symbol;Acc:MGI:2388479]	protein_coding			Ppp2r5a		ENSG00000066027	PPP2R5A	5525	2275.37	0.042545	0.123886	0.34342	0.731282	0.884993
ENSMAUG00000000320	Epcam	9224186	9239741		epithelial cell adhesion molecule [Source:MGI Symbol;Acc:MGI:106653]	protein_coding			Epcam		ENSG00000119888	EPCAM	4072	3903.6	-0.0338156	0.128504	-0.263149	0.792436	0.910425
ENSMAUG00000000321	SVIL	1433692	1434449			protein_coding					ENSG00000197321	SVIL	6840	1475.19	-0.0539756	0.207195	-0.260506	0.794473	0.911386
ENSMAUG00000000322	Stam2	13076438	13124086	101822646	signal transducing adaptor molecule 2 [Source:NCBI gene;Acc:101822646]	protein_coding			Stam2	101822646	ENSG00000115145	STAM2	10254	1660.74	0.305714	0.207161	1.47573	0.140015	0.588021
ENSMAUG00000000324	Rrp8	228073	233480	101822816	ribosomal RNA processing 8 [Source:NCBI gene;Acc:101822816]	protein_coding			Rrp8	101822816	ENSG00000132275	RRP8	23378	666.86	-0.262232	0.110314	-2.37715	0.0174472	0.376317
ENSMAUG00000000325	Atp11b	12352504	12440933	101837514	ATPase phospholipid transporting 11B (putative) [Source:NCBI gene;Acc:101837514]	protein_coding			Atp11b	101837514	ENSG00000058063	ATP11B	23200	2002.23	0.324176	0.229346	1.41348	0.157514	0.602563
ENSMAUG00000000327	Tradd	530399	536018	101844833	TNFRSF1A associated via death domain [Source:NCBI gene;Acc:101844833]	protein_coding			Tradd	101844833	ENSG00000102871	TRADD	8717	1149.33	-0.215513	0.168943	-1.27565	0.202078	0.619239
ENSMAUG00000000328	Sycp1	3403924	3492867		synaptonemal complex protein 1 [Source:MGI Symbol;Acc:MGI:105931]	protein_coding			Sycp1		ENSG00000198765	SYCP1	6847	4.69702	-0.491382	0.843858	-0.582305	0.560361	0.805849
ENSMAUG00000000329	D1Pas1	3205949	3207970	101833450	putative ATP-dependent RNA helicase Pl10 [Source:NCBI gene;Acc:101833450]	protein_coding								4.17321	1.2821	0.845855	1.51574	0.129584	0.58005
ENSMAUG00000000330	Impdh1	10063601	10079125	101838245	inosine monophosphate dehydrogenase 1 [Source:NCBI gene;Acc:101838245]	protein_coding			Impdh1	101838245	ENSG00000106348	IMPDH1	3614	2601.34	-0.441266	0.135105	-3.2661	0.0010904	0.111651
ENSMAUG00000000331	Dock10	1222294	1457099	101830814	dedicator of cytokinesis 10 [Source:NCBI gene;Acc:101830814]	protein_coding			Dock10	101830814	ENSG00000135905	DOCK10	55619	1063.04	0.115928	0.190319	0.609123	0.542443	0.795659
ENSMAUG00000000332	Ecrg4	1464764	1475933	101823294	ECRG4 augurin precursor [Source:NCBI gene;Acc:101823294]	protein_coding			Ecrg4	101823294	ENSG00000119147	ECRG4	84417	5.51571	-0.460861	0.948588	-0.485839	0.627081	0.837525
ENSMAUG00000000333	Vstm5	1162605	1181814	101826311	V-set and transmembrane domain containing 5 [Source:NCBI gene;Acc:101826311]	protein_coding			Vstm5	101826311	ENSG00000214376	VSTM5	387804	38.8789	0.366902	0.497382	0.737666	0.460718	0.75019
ENSMAUG00000000334	Slamf6	9895381	9916666		SLAM family member 6 [Source:MGI Symbol;Acc:MGI:1353620]	protein_coding			Slamf6		ENSG00000162739	SLAMF6	114836	120.265	0.286138	0.481192	0.594645	0.552081	0.802163
ENSMAUG00000000336	FMR1	163	8463	101824858	synaptic functional regulator FMR1 [Source:NCBI gene;Acc:101824858]	protein_coding				101824858	ENSG00000102081	FMR1	2332	150.956	0.723455	0.540089	1.33951	0.180404	0.611715
ENSMAUG00000000337	Esrrb	3613972	3704826		estrogen related receptor, beta [Source:MGI Symbol;Acc:MGI:1346832]	protein_coding			Esrrb		ENSG00000119715	ESRRB	2103	20.6816	0.0421596	0.408905	0.103104	0.917881	0.967987
ENSMAUG00000000338	Pbdc1	13064	54956	101833977	polysaccharide biosynthesis domain containing 1 [Source:NCBI gene;Acc:101833977]	protein_coding			Pbdc1	101833977	ENSG00000102390	PBDC1	51260	634.347	-0.138174	0.126205	-1.09484	0.273586	0.655021
ENSMAUG00000000340	Ndufb2	1262172	1267062	101842033	NADH:ubiquinone oxidoreductase subunit B2 [Source:NCBI gene;Acc:101842033]	protein_coding			Ndufb2	101842033	ENSG00000090266	NDUFB2	4708	3414.21	-0.154283	0.178817	-0.862799	0.388248	0.714427
ENSMAUG00000000342	Pde5a	7414819	7540601	101838674	phosphodiesterase 5A [Source:NCBI gene;Acc:101838674]	protein_coding			Pde5a	101838674	ENSG00000138735	PDE5A	8654	1556.91	0.449555	0.690008	0.651522	0.514709	0.782442
ENSMAUG00000000343	Pds5b	547398	674622	101836749	PDS5 cohesin associated factor B [Source:NCBI gene;Acc:101836749]	protein_coding			Pds5b	101836749	ENSG00000083642	PDS5B	23047	1615	0.0839206	0.147507	0.568926	0.569407	0.810369
ENSMAUG00000000345	Fzd4	510122	518782	101839425	frizzled class receptor 4 [Source:NCBI gene;Acc:101839425]	protein_coding			Fzd4	101839425	ENSG00000174804	FZD4	8322	4691.86	0.245784	0.237602	1.03443	0.300934	0.668472
ENSMAUG00000000346	Txndc11	3301156	3354091	101829653	thioredoxin domain containing 11 [Source:NCBI gene;Acc:101829653]	protein_coding			Txndc11	101829653	ENSG00000153066	TXNDC11	51061	1734.91	-0.150056	0.0760965	-1.97192	0.0486185	0.500738
ENSMAUG00000000347	MRPL55	78	3280	101829059	mitochondrial ribosomal protein L55 [Source:NCBI gene;Acc:101829059]	protein_coding				101829059	ENSG00000162910	MRPL55	128308	759.232	0.043423	0.177587	0.244516	0.806831	0.9184
ENSMAUG00000000348	Hps3	1200450	1223086		HPS3, biogenesis of lysosomal organelles complex 2 subunit 1 [Source:MGI Symbol;Acc:MGI:2153839]	protein_coding			Hps3		ENSG00000163755	HPS3	84343	502.728	0.192001	0.166892	1.15046	0.249956	0.639577
ENSMAUG00000000349	Arhgap30	101419	113796	101839534	Rho GTPase activating protein 30 [Source:NCBI gene;Acc:101839534]	protein_coding			Arhgap30	101839534	ENSG00000186517	ARHGAP30	257106	2539	-0.0810131	0.19749	-0.410213	0.681649	0.862439
ENSMAUG00000000350	Rbp1	8140174	8159941	101833010	retinol binding protein 1 [Source:NCBI gene;Acc:101833010]	protein_coding			Rbp1	101833010	ENSG00000114115	RBP1	5947	215.421	0.25616	0.418002	0.61282	0.539995	0.794583
ENSMAUG00000000351	Lipg	865227	888061	101842081	lipase G, endothelial type [Source:NCBI gene;Acc:101842081]	protein_coding			Lipg	101842081	ENSG00000101670	LIPG	9388	620.827	-0.000258062	0.265091	-0.000973486	0.999223	0.999699
ENSMAUG00000000353	Ogdhl	5288349	5309881	101830451	oxoglutarate dehydrogenase like [Source:NCBI gene;Acc:101830451]	protein_coding			Ogdhl	101830451	ENSG00000197444	OGDHL	55753	24.1492	0.685211	0.725866	0.943991	0.345174	0.691591
ENSMAUG00000000354	Sertm1	306834	328139	101822770	serine rich and transmembrane domain containing 1 [Source:NCBI gene;Acc:101822770]	protein_coding			Sertm1	101822770	ENSG00000180440	SERTM1	400120	3.54032	0.0285989	0.892963	0.032027	0.974451	0.99057
ENSMAUG00000000356	4931406C07Rik	1220453	1243484	101826569	chromosome unknown C11orf54 homolog [Source:NCBI gene;Acc:101826569]	protein_coding			4931406C07Rik	101826569	ENSG00000182919	C11orf54	28970	790.796	0.339874	0.109705	3.09806	0.00194789	0.1508
ENSMAUG00000000357	Atp11c	66681	173382		ATPase, class VI, type 11C [Source:MGI Symbol;Acc:MGI:1859661]	protein_coding			Atp11c		ENSG00000101974	ATP11C	286410	336.458	0.674035	0.550198	1.22508	0.220547	0.624433
ENSMAUG00000000358	Sdccag8	5686874	5886542	101840028	serologically defined colon cancer antigen 8 [Source:NCBI gene;Acc:101840028]	protein_coding			Sdccag8	101840028	ENSG00000054282	SDCCAG8	10806	1825.79	0.00669663	0.0910873	0.0735188	0.941393	0.976953
ENSMAUG00000000359	Slc7a1	2884414	2950587	101839504	solute carrier family 7 member 1 [Source:NCBI gene;Acc:101839504]	protein_coding			Slc7a1	101839504	ENSG00000139514	SLC7A1	6541	725.862	0.557063	0.221571	2.51416	0.0119317	0.331162
ENSMAUG00000000361	Timp3	2721892	2770071	101831793	TIMP metallopeptidase inhibitor 3 [Source:NCBI gene;Acc:101831793]	protein_coding			Timp3	101831793	ENSG00000100234	TIMP3	7078	26397.7	0.059908	0.184757	0.324252	0.745747	0.89201
ENSMAUG00000000362	Siglech	2436364	2442022		sialic acid binding Ig-like lectin H [Source:MGI Symbol;Acc:MGI:2443256]	protein_coding								26.9363	-1.12783	0.673759	-1.67393	0.0941436	0.559622
ENSMAUG00000000363	Atp6v1h	2116555	2206441	101822803	ATPase H+ transporting V1 subunit H [Source:NCBI gene;Acc:101822803]	protein_coding			Atp6v1h	101822803	ENSG00000047249	ATP6V1H	51606	2755.46	-0.099095	0.0767205	-1.29164	0.196483	0.618538
ENSMAUG00000000364	LYZ	3713007	3718568	101844949	lysozyme C-2-like [Source:NCBI gene;Acc:101844949]	protein_coding				101844949	ENSG00000090382	LYZ	4069	3664.19	-0.32694	0.336572	-0.971384	0.331357	0.686202
ENSMAUG00000000365	Tmem19	1902265	1918763		transmembrane protein 19 [Source:MGI Symbol;Acc:MGI:1914476]	protein_coding			Tmem19		ENSG00000139291	TMEM19	55266	592.223	0.012867	0.0730934	0.176034	0.860267	0.941837
ENSMAUG00000000366	Pole3	13285659	13288152	101841194	DNA polymerase epsilon 3, accessory subunit [Source:NCBI gene;Acc:101841194]	protein_coding			Pole3	101841194	ENSG00000148229	POLE3	54107	2377.19	-0.135851	0.0787353	-1.72541	0.0844536	0.54595
ENSMAUG00000000368	Ndufa1	2380293	2385263	101823499	NADH:ubiquinone oxidoreductase subunit A1 [Source:NCBI gene;Acc:101823499]	protein_coding			Ndufa1	101823499	ENSG00000125356	NDUFA1	4694	3370.81	-0.0608451	0.150848	-0.403355	0.686687	0.86479
ENSMAUG00000000369	Large1	10298228	10650482	101842446	LARGE xylosyl- and glucuronyltransferase 1 [Source:NCBI gene;Acc:101842446]	protein_coding			Large1	101842446	ENSG00000133424	LARGE1	9215	1033.68	-0.117376	0.204637	-0.573582	0.56625	0.808967
ENSMAUG00000000370	Kcnk12	9339192	9340412		potassium channel, subfamily K, member 12 [Source:MGI Symbol;Acc:MGI:2684043]	protein_coding			Kcnk12		ENSG00000184261	KCNK12	56660	8.59756	0.152145	0.683454	0.222613	0.823837	0.92537
ENSMAUG00000000371	Azin2	2270835	2287945	101830459	antizyme inhibitor 2 [Source:NCBI gene;Acc:101830459]	protein_coding			Azin2	101830459	ENSG00000142920	AZIN2	113451	239.627	-0.0974775	0.210177	-0.463787	0.6428	0.844977
ENSMAUG00000000372	Kbtbd6	9680826	9682277		kelch repeat and BTB (POZ) domain containing 6 [Source:MGI Symbol;Acc:MGI:3643058]	protein_coding								55.326	0.348082	0.530502	0.656136	0.511737	0.780674
ENSMAUG00000000373	Olfml3	4359433	4362044	101833769	olfactomedin like 3 [Source:NCBI gene;Acc:101833769]	protein_coding			Olfml3	101833769	ENSG00000116774	OLFML3	56944	1922.81	-0.0583801	0.262537	-0.222369	0.824027	0.925446
ENSMAUG00000000374	Zbtb7c	2051156	2060261	101831060	zinc finger and BTB domain containing 7C [Source:NCBI gene;Acc:101831060]	protein_coding			Zbtb7c	101831060	ENSG00000184828	ZBTB7C	201501	336.318	0.719209	0.572548	1.25616	0.20906	0.621679
ENSMAUG00000000375	Sec22c	2316352	2338141	101843251	SEC22 homolog C, vesicle trafficking protein [Source:NCBI gene;Acc:101843251]	protein_coding			Sec22c	101843251	ENSG00000093183	SEC22C	9117	1774.07	-0.156685	0.159822	-0.980375	0.326901	0.683026
ENSMAUG00000000376	Nod1	1123369	1175189	101841900	nucleotide binding oligomerization domain containing 1 [Source:NCBI gene;Acc:101841900]	protein_coding			Nod1	101841900	ENSG00000106100	NOD1	10392	3072.42	0.104524	0.181991	0.574336	0.56574	0.808837
ENSMAUG00000000377	SEC14L1	4548	7406			protein_coding					ENSG00000129657	SEC14L1	6397	1383.58	0.0744875	0.300082	0.248224	0.803961	0.916902
ENSMAUG00000000378	Clasrp	846116	866248	101838375	CLK4 associating serine/arginine rich protein [Source:NCBI gene;Acc:101838375]	protein_coding			Clasrp	101838375	ENSG00000104859	CLASRP	11129	2371.39	-0.185813	0.175371	-1.05954	0.289354	0.660562
ENSMAUG00000000379	Slc38a5	3169664	3178799	101842739	solute carrier family 38 member 5 [Source:NCBI gene;Acc:101842739]	protein_coding			Slc38a5	101842739	ENSG00000017483	SLC38A5	92745	134.181	0.295574	0.424687	0.69598	0.486441	0.767105
ENSMAUG00000000380	Slco5a1	8564981	8725213	101832079	solute carrier organic anion transporter family member 5A1 [Source:NCBI gene;Acc:101832079]	protein_coding			Slco5a1	101832079	ENSG00000137571	SLCO5A1	81796	104.1	0.40577	0.297545	1.36373	0.172654	0.610838
ENSMAUG00000000381	Igsf9b	3129600	3164767	101840030	immunoglobulin superfamily member 9B [Source:NCBI gene;Acc:101840030]	protein_coding			Igsf9b	101840030	ENSG00000080854	IGSF9B	22997	6.04574	0.429025	0.741134	0.578877	0.562672	0.807109
ENSMAUG00000000382	Prob1	935723	938905	101835380	proline rich basic protein 1 [Source:NCBI gene;Acc:101835380]	protein_coding			Prob1	101835380	ENSG00000228672	PROB1	389333	41.9413	-0.263574	0.220688	-1.19433	0.23235	0.629497
ENSMAUG00000000383	Stat6	3824416	3839340	101832739	signal transducer and activator of transcription 6 [Source:NCBI gene;Acc:101832739]	protein_coding			Stat6	101832739	ENSG00000166888	STAT6	6778	6611.9	-0.128515	0.072738	-1.76682	0.077258	0.537298
ENSMAUG00000000385	Mcts1	1480754	1492975	101843897	MCTS1 re-initiation and release factor [Source:NCBI gene;Acc:101843897]	protein_coding			Mcts1	101843897	ENSG00000232119	MCTS1	28985	498.893	-0.185503	0.135403	-1.37	0.170687	0.60869
ENSMAUG00000000386	Polr1h	528032	532691	101844884	zinc ribbon domain containing 1 [Source:NCBI gene;Acc:101844884]	protein_coding			Polr1h	101844884	ENSG00000066379	POLR1H	30834	635.505	-0.241172	0.159117	-1.51569	0.129599	0.58005
ENSMAUG00000000387	Bcorl1	9840771	9886053		BCL6 co-repressor-like 1 [Source:MGI Symbol;Acc:MGI:2443910]	protein_coding			Bcorl1		ENSG00000085185	BCORL1	63035	555.299	0.143586	0.221337	0.648718	0.51652	0.782939
ENSMAUG00000000388	Cfap20dc	5123213	5360203	101831945	chromosome unknown C3orf67 homolog [Source:NCBI gene;Acc:101831945]	protein_coding			Cfap20dc	101831945	ENSG00000163689	CFAP20DC	200844	269.808	0.30568	0.296549	1.03079	0.302639	0.669718
ENSMAUG00000000391	Spcs1	687056	688662	101843719	signal peptidase complex subunit 1 [Source:NCBI gene;Acc:101843719]	protein_coding			Spcs1	101843719	ENSG00000114902	SPCS1	28972	4245.34	-0.166963	0.149541	-1.11651	0.264206	0.649584
ENSMAUG00000000394	Ndufa9	1710082	1732192	101833965	NADH:ubiquinone oxidoreductase subunit A9 [Source:NCBI gene;Acc:101833965]	protein_coding			Ndufa9	101833965	ENSG00000139180	NDUFA9	4704	3032.02	-0.0138453	0.0736729	-0.187929	0.850932	0.938211
ENSMAUG00000000395	NDOR1	5368	6982	101823625	NADPH-dependent diflavin oxidoreductase 1 [Source:NCBI gene;Acc:101823625]	protein_coding				101823625	ENSG00000188566	NDOR1	27158	653.259	-0.105067	0.180061	-0.583508	0.559551	0.805588
ENSMAUG00000000398	Msmb	5490704	5505210	101844676	microseminoprotein beta [Source:NCBI gene;Acc:101844676]	protein_coding			Msmb	101844676	ENSG00000263639	MSMB	4477	7.79084	0.0121484	1.44825	0.00838833	0.993307	0.997479
ENSMAUG00000000399	Trit1	241427	288061	101827971	tRNA isopentenyltransferase 1 [Source:NCBI gene;Acc:101827971]	protein_coding			Trit1	101827971	ENSG00000043514	TRIT1	54802	772.685	0.0157983	0.103063	0.153288	0.878172	0.950204
ENSMAUG00000000400	Klf10	13194674	13200897	101841002	Kruppel like factor 10 [Source:NCBI gene;Acc:101841002]	protein_coding			Klf10	101841002	ENSG00000155090	KLF10	7071	3904.37	0.0709297	0.180243	0.393523	0.693933	0.868188
ENSMAUG00000000401	Ippk	3505428	3549731	101834689	inositol-pentakisphosphate 2-kinase [Source:NCBI gene;Acc:101834689]	protein_coding			Ippk	101834689	ENSG00000127080	IPPK	64768	561.097	-0.0177468	0.0859194	-0.206552	0.83636	0.931925
ENSMAUG00000000402	RPA3	4575224	4578428	101833793	replication protein A3 [Source:NCBI gene;Acc:101833793]	protein_coding				101833793	ENSG00000106399	RPA3	6119	632.611	0.0323457	0.130348	0.248149	0.804019	0.916902
ENSMAUG00000000403	NDUFV1	197	1647	101827130	NADH dehydrogenase [ubiquinone] flavoprotein 1, mitochondrial [Source:NCBI gene;Acc:101827130]	protein_coding				101827130	ENSG00000167792	NDUFV1	4723	2778.86	-0.244618	0.165801	-1.47537	0.140114	0.588021
ENSMAUG00000000404	Zfp599	7901172	7916207		zinc finger protein 599 [Source:MGI Symbol;Acc:MGI:2679006]	protein_coding								3.56909	0.160442	1.0266	0.156285	0.875809	0.949184
ENSMAUG00000000406	S1pr1	533444	538067	101830449	sphingosine-1-phosphate receptor 1 [Source:NCBI gene;Acc:101830449]	protein_coding			S1pr1	101830449	ENSG00000170989	S1PR1	1901	5750.13	-0.0713849	0.325134	-0.219555	0.826218	0.926276
ENSMAUG00000000408	Bphl	19026368	19054326	101834783	biphenyl hydrolase like [Source:NCBI gene;Acc:101834783]	protein_coding			Bphl	101834783	ENSG00000137274	BPHL	670	1119.64	0.10359	0.126989	0.815741	0.414648	0.72778
ENSMAUG00000000409	Ccdc148	19124299	19306993	101828531	coiled-coil domain containing 148 [Source:NCBI gene;Acc:101828531]	protein_coding			Ccdc148	101828531	ENSG00000153237	CCDC148	130940	131.103	0.461536	0.314019	1.46977	0.141624	0.589501
ENSMAUG00000000410	Thsd1	168147	214187	101836088	thrombospondin type 1 domain containing 1 [Source:NCBI gene;Acc:101836088]	protein_coding			Thsd1	101836088	ENSG00000136114	THSD1	55901	2957.39	-0.0823836	0.186765	-0.441109	0.659134	0.851452
ENSMAUG00000000411	Coq7	464357	473231	101826192	coenzyme Q7, hydroxylase [Source:NCBI gene;Acc:101826192]	protein_coding			Coq7	101826192	ENSG00000167186	COQ7	10229	1195.67	0.00940197	0.141859	0.066277	0.947157	0.979559
ENSMAUG00000000412	SYTL2	802286	905867	101838136	synaptotagmin like 2 [Source:NCBI gene;Acc:101838136]	protein_coding				101838136	ENSG00000137501	SYTL2	54843	537.856	-0.0757205	0.2609	-0.290228	0.771642	0.90215
ENSMAUG00000000413	ELAC1	2191	3625			protein_coding					ENSG00000141642	ELAC1	55520	57.3115	0.233545	0.246839	0.946145	0.344075	0.691251
ENSMAUG00000000415	Zfp131	5656666	5684748	101840486	zinc finger protein 131 [Source:NCBI gene;Acc:101840486]	protein_coding			Zfp131	101840486	ENSG00000172262	ZNF131	7690	1162.18	0.296476	0.1532	1.93523	0.0529626	0.50972
ENSMAUG00000000416	Gapvd1	1296080	1350605		GTPase activating protein and VPS9 domains 1 [Source:MGI Symbol;Acc:MGI:1913941]	protein_coding			Gapvd1		ENSG00000165219	GAPVD1	26130	1327.37	0.32803	0.317197	1.03415	0.301064	0.668472
ENSMAUG00000000417	Man1a2	1135401	1243912		mannosidase, alpha, class 1A, member 2 [Source:MGI Symbol;Acc:MGI:104676]	protein_coding			Man1a2		ENSG00000198162	MAN1A2	10905	692.772	0.170679	0.252091	0.677054	0.498371	0.774795
ENSMAUG00000000419	MCOLN1	1555	6539	106022989	mucolipin-1-like [Source:NCBI gene;Acc:106022989]	protein_coding				106022989	ENSG00000090674	MCOLN1	57192	175.33	0.181957	0.144956	1.25526	0.209385	0.621679
ENSMAUG00000000420	Setx	2357711	2409985		senataxin [Source:MGI Symbol;Acc:MGI:2443480]	protein_coding			Setx		ENSG00000107290	SETX	23064	1321.92	0.227328	0.131686	1.72628	0.0842963	0.54595
ENSMAUG00000000422	Gnao1	277415	432096	101830536	G protein subunit alpha o1 [Source:NCBI gene;Acc:101830536]	protein_coding								3993.21	-0.315049	0.239895	-1.31328	0.189088	0.614558
ENSMAUG00000000423	Rasgrp3	10997324	11071334	101834186	RAS guanyl releasing protein 3 [Source:NCBI gene;Acc:101834186]	protein_coding			Rasgrp3	101834186	ENSG00000152689	RASGRP3	25780	2273.41	0.0954291	0.275752	0.346069	0.729291	0.884154
ENSMAUG00000000424	Taf3	2844546	2986914	101834805	TATA-box binding protein associated factor 3 [Source:NCBI gene;Acc:101834805]	protein_coding			Taf3	101834805	ENSG00000165632	TAF3	83860	1023.86	0.0858931	0.151317	0.567636	0.570282	0.810803
ENSMAUG00000000425	Smco4	1437319	1497294		single-pass membrane protein with coiled-coil domains 4 [Source:MGI Symbol;Acc:MGI:3039636]	protein_coding			Smco4		ENSG00000166002	SMCO4	56935	2044.18	0.126	0.190971	0.659786	0.509391	0.779621
ENSMAUG00000000426	TAX1BP1	49516	64238			protein_coding					ENSG00000106052	TAX1BP1	8887	420.699	0.359024	0.302441	1.18709	0.235193	0.630387
ENSMAUG00000000428	Sntg2	5391627	5594054		syntrophin, gamma 2 [Source:MGI Symbol;Acc:MGI:1919541]	protein_coding			Sntg2		ENSG00000172554	SNTG2	54221	355.914	-0.430523	0.402091	-1.07071	0.2843	0.660161
ENSMAUG00000000429	Robo2	245970	409656	101842014	roundabout guidance receptor 2 [Source:NCBI gene;Acc:101842014]	protein_coding			Robo2	101842014	ENSG00000185008	ROBO2	6092	174.155	-0.0297752	0.361191	-0.0824363	0.9343	0.974034
ENSMAUG00000000430	Tbc1d20	3079	22087	101832326	TBC1 domain family member 20 [Source:NCBI gene;Acc:101832326]	protein_coding			Tbc1d20	101832326	ENSG00000125875	TBC1D20	128637	8144.64	0.0602547	0.0571516	1.0543	0.291747	0.661466
ENSMAUG00000000431	Rab38	1029690	1091181	101839690	RAB38, member RAS oncogene family [Source:NCBI gene;Acc:101839690]	protein_coding			Rab38	101839690	ENSG00000123892	RAB38	23682	687.389	0.278055	0.15427	1.80239	0.0714837	0.5306
ENSMAUG00000000432	Barx1	4335306	4338138	101837922	BARX homeobox 1 [Source:NCBI gene;Acc:101837922]	protein_coding			Barx1	101837922	ENSG00000131668	BARX1	56033	7.46237	-0.568343	0.590778	-0.962025	0.336037	0.687072
ENSMAUG00000000433	Sh3bgrl	4571951	4667274		SH3-binding domain glutamic acid-rich protein like [Source:MGI Symbol;Acc:MGI:1930849]	protein_coding			Sh3bgrl		ENSG00000131171	SH3BGRL	6451	4780.38	0.105889	0.121273	0.87314	0.382587	0.711933
ENSMAUG00000000434	Bhlhb9	32022	36597	101836612	basic helix-loop-helix family member b9 [Source:NCBI gene;Acc:101836612]	protein_coding								557.54	0.306293	0.120898	2.53347	0.0112938	0.325111
ENSMAUG00000000435	Cog6	2331413	2374170	101832645	component of oligomeric golgi complex 6 [Source:NCBI gene;Acc:101832645]	protein_coding			Cog6	101832645	ENSG00000133103	COG6	57511	1210.73	0.0946489	0.160308	0.590419	0.55491	0.803102
ENSMAUG00000000436	Efr3b	8804787	8875927	101828480	EFR3 homolog B [Source:NCBI gene;Acc:101828480]	protein_coding			Efr3b	101828480	ENSG00000084710	EFR3B	22979	142.359	0.0920855	0.357024	0.257925	0.796465	0.912106
ENSMAUG00000000438	Exoc3l	561888	567736	101824000	exocyst complex component 3 like 1 [Source:NCBI gene;Acc:101824000]	protein_coding			Exoc3l	101824000	ENSG00000179044	EXOC3L1	283849	2617.27	-0.668877	0.255758	-2.61527	0.00891563	0.296717
ENSMAUG00000000439	Fto	3005837	3356265	101835182	FTO alpha-ketoglutarate dependent dioxygenase [Source:NCBI gene;Acc:101835182]	protein_coding			Fto	101835182	ENSG00000140718	FTO	79068	1707.92	0.0817926	0.120789	0.677155	0.498308	0.774795
ENSMAUG00000000440	Ptk7	10832393	10894226	101844288	protein tyrosine kinase 7 (inactive) [Source:NCBI gene;Acc:101844288]	protein_coding			Ptk7	101844288	ENSG00000112655	PTK7	5754	4239.78	-0.138685	0.120159	-1.15418	0.248426	0.639577
ENSMAUG00000000441	Nacad	1084211	1092650	101840980	NAC alpha domain containing [Source:NCBI gene;Acc:101840980]	protein_coding			Nacad	101840980	ENSG00000136274	NACAD	23148	301.075	-0.691125	0.185591	-3.72392	0.000196155	0.0331113
ENSMAUG00000000442	Pde12	6641848	6646198	101823660	phosphodiesterase 12 [Source:NCBI gene;Acc:101823660]	protein_coding			Pde12	101823660	ENSG00000174840	PDE12	201626	153.294	1.03194	0.598152	1.72522	0.0844876	0.54595
ENSMAUG00000000443	TMEM131	3028	5811			protein_coding					ENSG00000075568	TMEM131	23505	1035.55	0.0509865	0.108501	0.469918	0.638414	0.842443
ENSMAUG00000000444	Fndc5	2471174	2478087	101831417	fibronectin type III domain containing 5 [Source:NCBI gene;Acc:101831417]	protein_coding			Fndc5	101831417	ENSG00000160097	FNDC5	252995	123.636	0.155239	0.657906	0.235959	0.813465	0.921421
ENSMAUG00000000445	Adgrl1	315363	358119	101838116	adhesion G protein-coupled receptor L1 [Source:NCBI gene;Acc:101838116]	protein_coding			Adgrl1	101838116	ENSG00000072071	ADGRL1	22859	1238.28	-0.21307	0.132799	-1.60446	0.108612	0.568991
ENSMAUG00000000446	HIBADH	125347	220979	101826059	3-hydroxyisobutyrate dehydrogenase [Source:NCBI gene;Acc:101826059]	protein_coding				101826059	ENSG00000106049	HIBADH	11112	1765.5	0.218633	0.125615	1.74051	0.0817702	0.540667
ENSMAUG00000000447	Tbc1d2b	556621	634397	101827698	TBC1 domain family member 2B [Source:NCBI gene;Acc:101827698]	protein_coding			Tbc1d2b	101827698	ENSG00000167202	TBC1D2B	23102	5426.3	0.17674	0.109721	1.61082	0.107219	0.567727
ENSMAUG00000000448	Adgrf1	7292118	7334601	101832978	adhesion G protein-coupled receptor F1 [Source:NCBI gene;Acc:101832978]	protein_coding			Adgrf1	101832978	ENSG00000153292	ADGRF1	266977	5.04923	-0.536009	0.844406	-0.634776	0.525574	0.78689
ENSMAUG00000000449	Smg1	779235	844619		SMG1 homolog, phosphatidylinositol 3-kinase-related kinase (C. elegans) [Source:MGI Symbol;Acc:MGI:1919742]	protein_coding			Smg1		ENSG00000157106	SMG1	23049	909.352	0.530085	0.33306	1.59156	0.111483	0.569642
ENSMAUG00000000450	Arhgef3	7156463	7317826	101835782	Rho guanine nucleotide exchange factor 3 [Source:NCBI gene;Acc:101835782]	protein_coding			Arhgef3	101835782	ENSG00000163947	ARHGEF3	50650	5033.51	-0.17971	0.161803	-1.11068	0.266708	0.650303
ENSMAUG00000000451	Kirrel	3673279	3732841	101842540	kirre like nephrin family adhesion molecule 1 [Source:NCBI gene;Acc:101842540]	protein_coding			Kirrel	101842540	ENSG00000183853	KIRREL1	55243	2270.91	0.175816	0.261328	0.672781	0.501087	0.776396
ENSMAUG00000000452	Lama1	1831961	1967656		laminin, alpha 1 [Source:MGI Symbol;Acc:MGI:99892]	protein_coding			Lama1		ENSG00000101680	LAMA1	284217	65.252	0.888309	0.299759	2.96341	0.00304254	0.18548
ENSMAUG00000000453	Wdyhv1	3458342	3478323	101831970	WDYHV motif containing 1 [Source:NCBI gene;Acc:101831970]	protein_coding			Wdyhv1	101831970	ENSG00000156795	NTAQ1	55093	383.535	-0.0070623	0.116915	-0.0604052	0.951833	0.980995
ENSMAUG00000000454	Matn2	16329411	16453526	101823643	matrilin 2 [Source:NCBI gene;Acc:101823643]	protein_coding			Matn2	101823643	ENSG00000132561	MATN2	4147	3697.02	-0.204323	0.495205	-0.412602	0.679898	0.861728
ENSMAUG00000000455	Fzd1	3831712	3833673	101832756	frizzled class receptor 1 [Source:NCBI gene;Acc:101832756]	protein_coding			Fzd1	101832756	ENSG00000157240	FZD1	8321	1282.36	-0.0971023	0.331915	-0.292552	0.769865	0.901527
ENSMAUG00000000456	SLC26A9	51740	62670	101837083	solute carrier family 26 member 9 [Source:NCBI gene;Acc:101837083]	protein_coding				101837083	ENSG00000174502	SLC26A9	115019	2350.69	0.226185	0.19991	1.13143	0.257873	0.644902
ENSMAUG00000000458	Lin9	2454492	2490030		lin-9 homolog (C. elegans) [Source:MGI Symbol;Acc:MGI:1919818]	protein_coding			Lin9		ENSG00000183814	LIN9	286826	32.9543	0.0425842	0.384397	0.110782	0.911789	0.965873
ENSMAUG00000000460	Gm17660	3807915	3814640		predicted gene, 17660 [Source:MGI Symbol;Acc:MGI:4937294]	protein_coding								35.1233	0.219905	0.379834	0.57895	0.562623	0.807109
ENSMAUG00000000461	Kmo	6965814	6998407	101842536	kynurenine 3-monooxygenase [Source:NCBI gene;Acc:101842536]	protein_coding			Kmo	101842536	ENSG00000117009	KMO	8564	60.2348	-0.190214	0.399291	-0.476378	0.633805	0.84064
ENSMAUG00000000462	Ndufb7	338672	343982	101826724	NADH:ubiquinone oxidoreductase subunit B7 [Source:NCBI gene;Acc:101826724]	protein_coding			Ndufb7	101826724	ENSG00000099795	NDUFB7	4713	2872.66	-0.217303	0.20315	-1.06967	0.284769	0.660161
ENSMAUG00000000463	Pkhd1l1	8148679	8284947	101829168	PKHD1 like 1 [Source:NCBI gene;Acc:101829168]	protein_coding			Pkhd1l1	101829168	ENSG00000205038	PKHD1L1	93035	4623.81	1.09814	0.816375	1.34514	0.178579	0.611361
ENSMAUG00000000464	Pin1	9528404	9540907	101836465	peptidylprolyl cis/trans isomerase, NIMA-interacting 1 [Source:NCBI gene;Acc:101836465]	protein_coding				101836465	ENSG00000127445	PIN1	5300	2473.91	-0.161295	0.128488	-1.25533	0.20936	0.621679
ENSMAUG00000000465	Acly	551313	596882	101830495	ATP citrate lyase [Source:NCBI gene;Acc:101830495]	protein_coding			Acly	101830495	ENSG00000131473	ACLY	47	7238.06	0.045052	0.127682	0.352844	0.724205	0.881443
ENSMAUG00000000466	Pdzd4	727675	762736	101833654	PDZ domain containing 4 [Source:NCBI gene;Acc:101833654]	protein_coding			Pdzd4	101833654	ENSG00000067840	PDZD4	57595	22.8401	-0.80793	0.451665	-1.78878	0.0736496	0.534958
ENSMAUG00000000467	Fbxo27	1477056	1485676	101831719	F-box protein 27 [Source:NCBI gene;Acc:101831719]	protein_coding			Fbxo27	101831719	ENSG00000161243	FBXO27	126433	2253.3	0.0715545	0.133078	0.537689	0.590792	0.82073
ENSMAUG00000000468	Dennd2a	1336029	1408470		DENN/MADD domain containing 2A [Source:MGI Symbol;Acc:MGI:2444961]	protein_coding			Dennd2a		ENSG00000146966	DENND2A	27147	2579.44	-0.40693	0.284068	-1.43251	0.151998	0.597354
ENSMAUG00000000469	Spry2	14342510	14347537	101838213	sprouty RTK signaling antagonist 2 [Source:NCBI gene;Acc:101838213]	protein_coding			Spry2	101838213	ENSG00000136158	SPRY2	10253	1464.16	0.129934	0.112297	1.15705	0.247252	0.639277
ENSMAUG00000000470	Hs6st2	1790600	2049653	101822801	heparan sulfate 6-O-sulfotransferase 2 [Source:NCBI gene;Acc:101822801]	protein_coding			Hs6st2	101822801	ENSG00000171004	HS6ST2	90161	6.29231	1.35652	0.740607	1.83163	0.0670059	0.525807
ENSMAUG00000000471	Map7d3	583473	606145	101839510	MAP7 domain containing 3 [Source:NCBI gene;Acc:101839510]	protein_coding			Map7d3	101839510	ENSG00000129680	MAP7D3	79649	93.601	0.735442	0.286515	2.56685	0.0102626	0.309167
ENSMAUG00000000472	Dcun1d4	4800801	4883374	101825429	defective in cullin neddylation 1 domain containing 4 [Source:NCBI gene;Acc:101825429]	protein_coding			Dcun1d4	101825429	ENSG00000109184	DCUN1D4	23142	1393.15	0.06389	0.102718	0.621992	0.533947	0.791292
ENSMAUG00000000473	Lhx2	3779289	3795674	101826559	LIM homeobox 2 [Source:NCBI gene;Acc:101826559]	protein_coding			Lhx2	101826559	ENSG00000106689	LHX2	9355	13.6039	-2.57173	1.44228	-1.7831	0.0745697	0.535541
ENSMAUG00000000474	Nrip1	24169512	24252431	101829594	nuclear receptor interacting protein 1 [Source:NCBI gene;Acc:101829594]	protein_coding			Nrip1	101829594	ENSG00000180530	NRIP1	8204	991.172	0.551856	0.206371	2.67409	0.00749323	0.284086
ENSMAUG00000000475	Otud4	3945119	3986762	101829359	OTU deubiquitinase 4 [Source:NCBI gene;Acc:101829359]	protein_coding			Otud4	101829359	ENSG00000164164	OTUD4	54726	2463.2	0.333622	0.195624	1.70543	0.0881149	0.549731
ENSMAUG00000000476	Ly6g6e	410	1430	101826250	sperm acrosome membrane-associated protein 4-like [Source:NCBI gene;Acc:101826250]	protein_coding								22.5733	-0.0393462	0.343594	-0.114514	0.908831	0.964567
ENSMAUG00000000477	Whamm	7025367	7053431		WAS protein homolog associated with actin, golgi membranes and microtubules [Source:MGI Symbol;Acc:MGI:2142282]	protein_coding			Whamm		ENSG00000156232	WHAMM	123720	1002.9	0.10879	0.119317	0.911773	0.361888	0.699664
ENSMAUG00000000478	Npr3	8980016	9051916		natriuretic peptide receptor 3 [Source:MGI Symbol;Acc:MGI:97373]	protein_coding			Npr3		ENSG00000113389	NPR3	4883	516.503	-0.505222	0.469688	-1.07565	0.282082	0.658735
ENSMAUG00000000479	Urm1	468242	485062	101824581	ubiquitin related modifier 1 [Source:NCBI gene;Acc:101824581]	protein_coding			Urm1	101824581	ENSG00000167118	URM1	81605	1780.61	-0.26033	0.141634	-1.83805	0.0660555	0.525807
ENSMAUG00000000481	Ccl17	659972	661452	101828037	C-C motif chemokine ligand 17 [Source:NCBI gene;Acc:101828037]	protein_coding			Ccl17	101828037	ENSG00000102970	CCL17	6361	104.888	0.0121394	0.402077	0.0301918	0.975914	0.991181
ENSMAUG00000000483	Clec3b	960692	967419	101836836	C-type lectin domain family 3 member B [Source:NCBI gene;Acc:101836836]	protein_coding			Clec3b	101836836	ENSG00000163815	CLEC3B	7123	2496.79	-0.237531	0.236745	-1.00332	0.315707	0.676784
ENSMAUG00000000484	Pls3	310382	371675	101829681	plastin 3 [Source:NCBI gene;Acc:101829681]	protein_coding			Pls3	101829681	ENSG00000102024	PLS3	5358	8535.61	0.0531736	0.158667	0.335127	0.73753	0.887442
ENSMAUG00000000485	IL1R1	2863	10065	101823176	interleukin 1 receptor type 1 [Source:NCBI gene;Acc:101823176]	protein_coding				101823176	ENSG00000115594	IL1R1	3554	2492.15	0.283325	0.229454	1.23478	0.216912	0.621679
ENSMAUG00000000487	Wif1	7017881	7073395	101829019	WNT inhibitory factor 1 [Source:NCBI gene;Acc:101829019]	protein_coding			Wif1	101829019	ENSG00000156076	WIF1	11197	1462.58	-0.35997	0.269764	-1.33439	0.182076	0.612622
ENSMAUG00000000488	Hacd4	2894671	2946907	101824264	3-hydroxyacyl-CoA dehydratase 4 [Source:NCBI gene;Acc:101824264]	protein_coding			Hacd4	101824264	ENSG00000188921	HACD4	401494	153.468	0.789577	0.471995	1.67285	0.0943563	0.559622
ENSMAUG00000000489	Aen	4297182	4304374	101823397	apoptosis enhancing nuclease [Source:NCBI gene;Acc:101823397]	protein_coding			Aen	101823397	ENSG00000181026	AEN	64782	1366.61	-0.18503	0.159324	-1.16134	0.245504	0.636968
ENSMAUG00000000490	Rnf41	3192763	3213026	101825425	ring finger protein 41 [Source:NCBI gene;Acc:101825425]	protein_coding			Rnf41	101825425	ENSG00000181852	RNF41	10193	3375.9	-0.190802	0.080498	-2.37027	0.0177753	0.37853
ENSMAUG00000000493	Med17	1187638	1215260		mediator complex subunit 17 [Source:MGI Symbol;Acc:MGI:2182585]	protein_coding								908.406	-0.00192371	0.07365	-0.0261196	0.979162	0.992658
ENSMAUG00000000494	Snrnp25	597513	600164		small nuclear ribonucleoprotein 25 (U11/U12) [Source:MGI Symbol;Acc:MGI:1925622]	protein_coding			Snrnp25		ENSG00000161981	SNRNP25	79622	1010.57	-0.211764	0.171786	-1.23272	0.217681	0.621869
ENSMAUG00000000495	Zdhhc21	2421783	2469534	101824822	zinc finger DHHC-type palmitoyltransferase 21 [Source:NCBI gene;Acc:101824822]	protein_coding			Zdhhc21	101824822	ENSG00000175893	ZDHHC21	340481	253.025	0.727419	0.483785	1.5036	0.132684	0.581871
ENSMAUG00000000497	DVL2	357	4480			protein_coding					ENSG00000004975	DVL2	1856	331.161	-0.00777138	0.103745	-0.0749085	0.940288	0.976636
ENSMAUG00000000498	Tmed9	1785164	1789475	101831598	transmembrane p24 trafficking protein 9 [Source:NCBI gene;Acc:101831598]	protein_coding			Tmed9	101831598	ENSG00000184840	TMED9	54732	7998.08	-0.167963	0.12864	-1.30568	0.191661	0.615704
ENSMAUG00000000499	Zdhhc15	367880	459507	101834518	zinc finger DHHC-type palmitoyltransferase 15 [Source:NCBI gene;Acc:101834518]	protein_coding			Zdhhc15	101834518	ENSG00000102383	ZDHHC15	158866	39.4124	0.472231	0.415012	1.13787	0.255173	0.642839
ENSMAUG00000000500	Ndrg2	1018706	1028039	101838985	NDRG family member 2 [Source:NCBI gene;Acc:101838985]	protein_coding			Ndrg2	101838985	ENSG00000165795	NDRG2	57447	6553.81	-0.281569	0.152543	-1.84583	0.0649163	0.525258
ENSMAUG00000000502	Gm10135	5410407	5420747		predicted gene 10135 [Source:MGI Symbol;Acc:MGI:3710643]	protein_coding								355.781	0.33198	0.279376	1.18829	0.234719	0.630057
ENSMAUG00000000503	Rcor3	2939602	2980507	101838163	REST corepressor 3 [Source:NCBI gene;Acc:101838163]	protein_coding			Rcor3	101838163	ENSG00000117625	RCOR3	55758	928.742	0.229457	0.101323	2.26461	0.0235366	0.417106
ENSMAUG00000000504	Acin1	1298029	1353025		apoptotic chromatin condensation inducer 1 [Source:MGI Symbol;Acc:MGI:1891824]	protein_coding			Acin1		ENSG00000100813	ACIN1	22985	2998.58	-0.104986	0.0988595	-1.06197	0.288249	0.660562
ENSMAUG00000000505	Lst1	102259	104184		leukocyte specific transcript 1 [Source:MGI Symbol;Acc:MGI:1096324]	protein_coding			Lst1		ENSG00000204482	LST1	7940	2245.38	-0.146441	0.296437	-0.494003	0.621304	0.835716
ENSMAUG00000000507	Trib2	1852977	1875247	101836845	tribbles pseudokinase 2 [Source:NCBI gene;Acc:101836845]	protein_coding			Trib2	101836845	ENSG00000071575	TRIB2	28951	3194.52	-0.282413	0.291908	-0.967472	0.333308	0.686783
ENSMAUG00000000509	COL15A1	2864160	2890528			protein_coding					ENSG00000204291	COL15A1	1306	998.579	0.219583	0.197535	1.11161	0.266304	0.65011
ENSMAUG00000000510	Fgf18	18745951	18776630	101831487	fibroblast growth factor 18 [Source:NCBI gene;Acc:101831487]	protein_coding			Fgf18	101831487	ENSG00000156427	FGF18	8817	249.551	0.118921	0.318309	0.373603	0.708699	0.874995
ENSMAUG00000000511	Smurf1	855455	937897	101838251	SMAD specific E3 ubiquitin protein ligase 1 [Source:NCBI gene;Acc:101838251]	protein_coding			Smurf1	101838251	ENSG00000198742	SMURF1	57154	1012.02	0.149173	0.335209	0.445016	0.656309	0.850299
ENSMAUG00000000513	Shisa9	621284	906939	101824657	protein shisa-9 [Source:NCBI gene;Acc:101824657]	protein_coding			Shisa9	101824657	ENSG00000237515	SHISA9	729993	14.0845	0.329941	0.482015	0.684503	0.493658	0.772275
ENSMAUG00000000515	Nkd1	6166765	6237590	101838599	NKD inhibitor of WNT signaling pathway 1 [Source:NCBI gene;Acc:101838599]	protein_coding			Nkd1	101838599	ENSG00000140807	NKD1	85407	7268.11	-0.311652	0.242293	-1.28626	0.198351	0.619155
ENSMAUG00000000516	Chn2	1814281	2060441	101843500	chimerin 2 [Source:NCBI gene;Acc:101843500]	protein_coding								779.666	0.315242	0.143189	2.20158	0.0276953	0.443877
ENSMAUG00000000517	Dgcr8	7473701	7502983	101836377	DGCR8 microprocessor complex subunit [Source:NCBI gene;Acc:101836377]	protein_coding				101836377	ENSG00000128191	DGCR8	54487	1506.98	-0.160516	0.0739179	-2.17155	0.0298898	0.453277
ENSMAUG00000000518	Cct4	8214913	8229898	101830326	chaperonin containing TCP1 subunit 4 [Source:NCBI gene;Acc:101830326]	protein_coding			Cct4	101830326	ENSG00000115484	CCT4	10575	7017.6	-0.123042	0.078725	-1.56294	0.118067	0.573622
ENSMAUG00000000519	Was	2946056	2956604	101838897	WASP actin nucleation promoting factor [Source:NCBI gene;Acc:101838897]	protein_coding			Was	101838897	ENSG00000015285	WAS	7454	2071.55	-0.383279	0.216833	-1.76763	0.0771236	0.537298
ENSMAUG00000000520	Atg9b	759372	766030	101838024	autophagy related 9B [Source:NCBI gene;Acc:101838024]	protein_coding			Atg9b	101838024	ENSG00000181652	ATG9B	285973	322.56	0.220214	0.432631	0.50901	0.610745	0.831229
ENSMAUG00000000522	Tyw3	3464935	3478781		tRNA-yW synthesizing protein 3 homolog (S. cerevisiae) [Source:MGI Symbol;Acc:MGI:2445040]	protein_coding			Tyw3		ENSG00000162623	TYW3	127253	449.221	-0.0811042	0.186203	-0.435568	0.66315	0.85344
ENSMAUG00000000523	Sdsl	8865101	8878655	101840196	serine dehydratase like [Source:NCBI gene;Acc:101840196]	protein_coding			Sdsl	101840196	ENSG00000139410	SDSL	113675	151.726	0.343634	0.238868	1.43859	0.150266	0.595637
ENSMAUG00000000524	Ssh1	2471127	2523317	101822775	slingshot protein phosphatase 1 [Source:NCBI gene;Acc:101822775]	protein_coding			Ssh1	101822775	ENSG00000084112	SSH1	54434	1464.6	0.171254	0.142351	1.20304	0.22896	0.628086
ENSMAUG00000000525	Chst10	6199709	6225890	101829087	carbohydrate sulfotransferase 10 [Source:NCBI gene;Acc:101829087]	protein_coding			Chst10	101829087	ENSG00000115526	CHST10	9486	131.405	-0.00726853	0.288963	-0.0251539	0.979932	0.992664
ENSMAUG00000000526	CHD9	3619988	3759930	101836126	chromodomain helicase DNA binding protein 9 [Source:NCBI gene;Acc:101836126]	protein_coding				101836126	ENSG00000177200	CHD9	80205	963.821	0.584394	0.205686	2.8412	0.00449447	0.224462
ENSMAUG00000000528	Dnah5	7033148	7298482		dynein, axonemal, heavy chain 5 [Source:MGI Symbol;Acc:MGI:107718]	protein_coding			Dnah5		ENSG00000039139	DNAH5	1767	327.897	1.25013	0.494616	2.52748	0.0114884	0.326875
ENSMAUG00000000529	Mpig6b	228367	230659	101826065	megakaryocyte and platelet inhibitory receptor G6b [Source:NCBI gene;Acc:101826065]	protein_coding			Mpig6b	101826065	ENSG00000204420	MPIG6B	80739	357.834	-0.092081	0.315345	-0.292001	0.770286	0.901783
ENSMAUG00000000530	Ranbp1	7509350	7517717	101836822	RAN binding protein 1 [Source:NCBI gene;Acc:101836822]	protein_coding			Ranbp1	101836822	ENSG00000099901	RANBP1	5902	3075.71	-0.273029	0.138761	-1.96762	0.0491116	0.502077
ENSMAUG00000000532	Tmem53	4025351	4044699	101836234	transmembrane protein 53 [Source:NCBI gene;Acc:101836234]	protein_coding			Tmem53	101836234	ENSG00000126106	TMEM53	79639	335.642	0.0677215	0.200946	0.337014	0.736107	0.886892
ENSMAUG00000000535	Alas2	414761	437754	101838716	5'-aminolevulinate synthase 2 [Source:NCBI gene;Acc:101838716]	protein_coding			Alas2	101838716	ENSG00000158578	ALAS2	212	1375.12	0.977973	0.541911	1.80468	0.0711255	0.52986
ENSMAUG00000000536	Gjb5	677012	679903	101827948	gap junction protein beta 5 [Source:NCBI gene;Acc:101827948]	protein_coding			Gjb5	101827948	ENSG00000189280	GJB5	2709	439.28	0.306646	0.228295	1.34321	0.179206	0.611361
ENSMAUG00000000537	ASXL1	1121574	1132296			protein_coding					ENSG00000171456	ASXL1	171023	66.4678	0.357537	0.3801	0.94064	0.34689	0.692291
ENSMAUG00000000538	EIF2S1	6658220	6659234			protein_coding					ENSG00000134001	EIF2S1	1965	19.3488	-0.317836	0.336076	-0.945727	0.344288	0.691396
ENSMAUG00000000539	Gm36210	882551	887488		predicted gene, 36210 [Source:MGI Symbol;Acc:MGI:5595369]	protein_coding			Gm36210		ENSG00000283567	C19orf85	111064650	8.56815	0.719566	0.532789	1.35057	0.176835	0.611361
ENSMAUG00000000540	Ppp2r2b	17096313	17146215		protein phosphatase 2, regulatory subunit B, beta [Source:MGI Symbol;Acc:MGI:1920180]	protein_coding			Ppp2r2b		ENSG00000156475	PPP2R2B	5521	22.8911	0.121292	0.467928	0.25921	0.795473	0.911665
ENSMAUG00000000541	Ttll11	5633006	5887363		tubulin tyrosine ligase-like family, member 11 [Source:MGI Symbol;Acc:MGI:1921660]	protein_coding			Ttll11		ENSG00000175764	TTLL11	158135	572.971	-0.101372	0.159563	-0.635312	0.525225	0.786607
ENSMAUG00000000542	Ctsc	1218051	1250318	101839953	cathepsin C [Source:NCBI gene;Acc:101839953]	protein_coding			Ctsc	101839953	ENSG00000109861	CTSC	1075	11916.3	-0.0107386	0.145314	-0.0738991	0.941091	0.976953
ENSMAUG00000000543	Wdfy1	473651	519309	101829738	WD repeat and FYVE domain containing 1 [Source:NCBI gene;Acc:101829738]	protein_coding			Wdfy1	101829738	ENSG00000085449	WDFY1	57590	2562.55	0.247628	0.120738	2.05096	0.0402711	0.478378
ENSMAUG00000000544	Nrsn2	78354	85755	101832589	neurensin 2 [Source:NCBI gene;Acc:101832589]	protein_coding			Nrsn2	101832589	ENSG00000125841	NRSN2	80023	29.9261	-0.0621315	0.726008	-0.0855796	0.931801	0.972733
ENSMAUG00000000545	Uxs1	1384239	1452469		UDP-glucuronate decarboxylase 1 [Source:MGI Symbol;Acc:MGI:1915133]	protein_coding			Uxs1		ENSG00000115652	UXS1	80146	1171.09	0.0258775	0.194767	0.132864	0.894301	0.958622
ENSMAUG00000000546	Pcdhgb7	21933412	21936485		protocadherin gamma subfamily B, 7 [Source:MGI Symbol;Acc:MGI:1935199]	protein_coding			Pcdhgb7		ENSG00000254122	PCDHGB7	56099	719.008	0.0376807	0.292133	0.128984	0.89737	0.959876
ENSMAUG00000000547	Lamtor2	5101190	5103980	101828742	late endosomal/lysosomal adaptor, MAPK and MTOR activator 2 [Source:NCBI gene;Acc:101828742]	protein_coding			Lamtor2	101828742	ENSG00000116586	LAMTOR2	28956	2899.89	-0.157791	0.167313	-0.943088	0.345636	0.691681
ENSMAUG00000000548	Eif4h	4851812	4869707		eukaryotic translation initiation factor 4H [Source:MGI Symbol;Acc:MGI:1341822]	protein_coding			Eif4h		ENSG00000106682	EIF4H	7458	2444.1	-0.213319	0.0819139	-2.60419	0.00920911	0.299838
ENSMAUG00000000549	Kcp	10326969	10355203	101825758	kielin cysteine rich BMP regulator [Source:NCBI gene;Acc:101825758]	protein_coding			Kcp	101825758	ENSG00000135253	KCP	375616	44.0833	0.329114	0.312193	1.0542	0.291791	0.661466
ENSMAUG00000000550	Tox3	4372146	4472784	101836734	TOX high mobility group box family member 3 [Source:NCBI gene;Acc:101836734]	protein_coding			Tox3	101836734	ENSG00000103460	TOX3	27324	411.865	0.28017	0.234731	1.19358	0.232644	0.629542
ENSMAUG00000000551	Gspt1	3466917	3496556	101832837	G1 to S phase transition 1 [Source:NCBI gene;Acc:101832837]	protein_coding			Gspt1	101832837	ENSG00000103342	GSPT1	2935	1566.71	0.157813	0.162885	0.96886	0.332615	0.686645
ENSMAUG00000000552	Ddx27	793594	811238	101841354	DEAD-box helicase 27 [Source:NCBI gene;Acc:101841354]	protein_coding			Ddx27	101841354	ENSG00000124228	DDX27	55661	2536.18	-0.181433	0.1007	-1.80172	0.0715897	0.530789
ENSMAUG00000000553	Tcof1	12862317	12894608	101832113	treacle ribosome biogenesis factor 1 [Source:NCBI gene;Acc:101832113]	protein_coding			Tcof1	101832113	ENSG00000070814	TCOF1	6949	1726.73	-0.177589	0.0968859	-1.83297	0.0668074	0.525807
ENSMAUG00000000555	Akr1e1	5656282	5687411	101843859	aldo-keto reductase family 1 member E2 [Source:NCBI gene;Acc:101843859]	protein_coding			Akr1e1	101843859	ENSG00000165568	AKR1E2	83592	338.294	0.0564093	0.211462	0.266759	0.789655	0.910189
ENSMAUG00000000556	St8sia3	9512437	9524356	101833937	ST8 alpha-N-acetyl-neuraminide alpha-2,8-sialyltransferase 3 [Source:NCBI gene;Acc:101833937]	protein_coding			St8sia3	101833937	ENSG00000177511	ST8SIA3	51046	4.68676	-1.25662	1.19096	-1.05513	0.291364	0.661128
ENSMAUG00000000557	Ripk1	19058385	19088141	101835042	receptor interacting serine/threonine kinase 1 [Source:NCBI gene;Acc:101835042]	protein_coding			Ripk1	101835042	ENSG00000137275	RIPK1	8737	2586.04	0.419642	0.245577	1.7088	0.087488	0.549731
ENSMAUG00000000558	Eif2ak3	11194314	11259009		eukaryotic translation initiation factor 2 alpha kinase 3 [Source:MGI Symbol;Acc:MGI:1341830]	protein_coding			Eif2ak3		ENSG00000172071	EIF2AK3	9451	1303.17	-0.000759411	0.166047	-0.00457348	0.996351	0.998591
ENSMAUG00000000559	Chtf8	12318033	12328511	101836817	chromosome transmission fidelity factor 8 [Source:NCBI gene;Acc:101836817]	protein_coding			Chtf8	101836817	ENSG00000168802	CHTF8	54921	4416.89	-0.170803	0.0745821	-2.29013	0.0220135	0.405924
ENSMAUG00000000560	Ophn1	4139578	4398063		oligophrenin 1 [Source:MGI Symbol;Acc:MGI:2151070]	protein_coding			Ophn1		ENSG00000079482	OPHN1	4983	638.158	0.0293998	0.0916585	0.320754	0.748397	0.893083
ENSMAUG00000000562	TARS1	8521632	8527549			protein_coding					ENSG00000113407	TARS1	6897	328.313	0.29416	0.276824	1.06262	0.287953	0.660562
ENSMAUG00000000563	Ddah2	231839	235042	101826685	dimethylarginine dimethylaminohydrolase 2 [Source:NCBI gene;Acc:101826685]	protein_coding			Ddah2	101826685	ENSG00000213722	DDAH2	23564	4403.13	-0.528543	0.224216	-2.35729	0.0184089	0.382601
ENSMAUG00000000564	Tbk1	9407666	9445649	101842633	TANK binding kinase 1 [Source:NCBI gene;Acc:101842633]	protein_coding			Tbk1	101842633	ENSG00000183735	TBK1	29110	1966.45	0.227671	0.123078	1.84982	0.0643396	0.525066
ENSMAUG00000000565	PIM1	165	4172	101836687	serine/threonine-protein kinase pim-1 [Source:NCBI gene;Acc:101836687]	protein_coding				101836687	ENSG00000137193	PIM1	5292	1370.54	0.615152	0.251124	2.4496	0.0143016	0.347155
ENSMAUG00000000566	Hmox1	8609298	8616131	101833770	heme oxygenase 1 [Source:NCBI gene;Acc:101833770]	protein_coding			Hmox1	101833770	ENSG00000100292	HMOX1	3162	6092.52	-0.881204	0.23933	-3.68196	0.000231444	0.0378282
ENSMAUG00000000567	Ppwd1	9431799	9455513	101830656	peptidylprolyl isomerase domain and WD repeat containing 1 [Source:NCBI gene;Acc:101830656]	protein_coding			Ppwd1	101830656	ENSG00000113593	PPWD1	23398	613.531	0.18906	0.148009	1.27736	0.201476	0.619155
ENSMAUG00000000568	Slc35b4	1876512	1897579	101840041	solute carrier family 35 member B4 [Source:NCBI gene;Acc:101840041]	protein_coding			Slc35b4	101840041	ENSG00000205060	SLC35B4	84912	847.586	-0.0839437	0.0973328	-0.862441	0.388445	0.714521
ENSMAUG00000000569	Plscr1	2337592	2360417	101834040	phospholipid scramblase 1 [Source:NCBI gene;Acc:101834040]	protein_coding			Plscr1	101834040	ENSG00000188313	PLSCR1	5359	434.949	0.0730379	0.148683	0.49123	0.623264	0.836363
ENSMAUG00000000570	Zdhhc8	7521941	7535372	101837345	zinc finger DHHC-type palmitoyltransferase 8 [Source:NCBI gene;Acc:101837345]	protein_coding			Zdhhc8	101837345	ENSG00000099904	ZDHHC8	29801	4702.82	-0.158192	0.104415	-1.51503	0.129765	0.58005
ENSMAUG00000000571	Gtpbp4	9908972	9930584	101824427	GTP binding protein 4 [Source:NCBI gene;Acc:101824427]	protein_coding			Gtpbp4	101824427	ENSG00000107937	GTPBP4	23560	1777.92	0.00981884	0.0725208	0.135393	0.892301	0.957804
ENSMAUG00000000572	Rit1	5250155	5284683	101831155	Ras like without CAAX 1 [Source:NCBI gene;Acc:101831155]	protein_coding			Rit1	101831155	ENSG00000143622	RIT1	6016	4893.59	-0.122523	0.0914246	-1.34016	0.180195	0.611715
ENSMAUG00000000574	Nek9	535441	572419	101832420	NIMA related kinase 9 [Source:NCBI gene;Acc:101832420]	protein_coding			Nek9	101832420	ENSG00000119638	NEK9	91754	4807.7	0.0227556	0.144229	0.157775	0.874634	0.948934
ENSMAUG00000000575	Cdc42se1	3230262	3235045	101828943	CDC42 small effector 1 [Source:NCBI gene;Acc:101828943]	protein_coding			Cdc42se1	101828943	ENSG00000197622	CDC42SE1	56882	8411.09	-0.139241	0.114858	-1.21228	0.225404	0.626104
ENSMAUG00000000576	Sdhaf4	1551528	1558013		succinate dehydrogenase complex assembly factor 4 [Source:MGI Symbol;Acc:MGI:1915252]	protein_coding			Sdhaf4		ENSG00000154079	SDHAF4	135154	479.502	-0.133206	0.138942	-0.958718	0.337701	0.687472
ENSMAUG00000000577	MON2	8126394	8154427			protein_coding					ENSG00000061987	MON2	23041	203.73	0.528347	0.511434	1.03307	0.301572	0.668563
ENSMAUG00000000578	Rdh12	4721357	4733914	101824957	retinol dehydrogenase 12 [Source:NCBI gene;Acc:101824957]	protein_coding			Rdh12	101824957	ENSG00000139988	RDH12	145226	152.868	0.00649079	0.270083	0.0240326	0.980827	0.992841
ENSMAUG00000000581	Egfr	13899492	14065957	101838749	epidermal growth factor receptor [Source:NCBI gene;Acc:101838749]	protein_coding			Egfr	101838749	ENSG00000146648	EGFR	1956	291.669	0.892521	0.488882	1.82564	0.067905	0.525807
ENSMAUG00000000582	Zeb1	753376	807593	101832581	zinc finger E-box binding homeobox 1 [Source:NCBI gene;Acc:101832581]	protein_coding			Zeb1	101832581	ENSG00000148516	ZEB1	6935	2502.06	0.151628	0.291423	0.520302	0.602853	0.827004
ENSMAUG00000000583	Gpm6b	4211083	4356104	101841622	glycoprotein M6B [Source:NCBI gene;Acc:101841622]	protein_coding			Gpm6b	101841622	ENSG00000046653	GPM6B	2824	1408.44	-0.0749255	0.325921	-0.229889	0.818178	0.923198
ENSMAUG00000000584	Gtf2ird2	4390979	4420790		GTF2I repeat domain containing 2 [Source:MGI Symbol;Acc:MGI:2149780]	protein_coding								860.322	-0.00993726	0.138625	-0.0716842	0.942853	0.977542
ENSMAUG00000000585	Mrpl52	1076376	1079190	101828242	mitochondrial ribosomal protein L52 [Source:NCBI gene;Acc:101828242]	protein_coding			Mrpl52	101828242	ENSG00000172590	MRPL52	122704	2448.34	-0.231895	0.194244	-1.19384	0.232542	0.629497
ENSMAUG00000000586	SF3B6	8121122	8127796	101841822	splicing factor 3b subunit 6 [Source:NCBI gene;Acc:101841822]	protein_coding				101841822	ENSG00000115128	SF3B6	51639	2345.01	-0.117306	0.113211	-1.03617	0.300124	0.667639
ENSMAUG00000000587	ADAM22	850763	876123			protein_coding					ENSG00000008277	ADAM22	53616	5.54523	0.910034	0.891157	1.02118	0.307168	0.672788
ENSMAUG00000000588	Rnft2	6702394	6758600	101838598	ring finger protein, transmembrane 2 [Source:NCBI gene;Acc:101838598]	protein_coding			Rnft2	101838598	ENSG00000135119	RNFT2	84900	162.737	0.140619	0.162237	0.866751	0.386078	0.713628
ENSMAUG00000000589	Cib1	5668122	5672812	101826814	calcium and integrin binding 1 [Source:NCBI gene;Acc:101826814]	protein_coding			Cib1	101826814	ENSG00000185043	CIB1	10519	2181.66	-0.14445	0.200163	-0.721662	0.470502	0.756403
ENSMAUG00000000590	Cd36	6040389	6077436	101829279	CD36 molecule [Source:NCBI gene;Acc:101829279]	protein_coding			Cd36	101829279	ENSG00000135218	CD36	948	19272.8	0.11174	0.311534	0.358676	0.719837	0.879323
ENSMAUG00000000591	6820408C15Rik	173945	189955	101841411	chromosome unknown C20orf96 homolog [Source:NCBI gene;Acc:101841411]	protein_coding			6820408C15Rik	101841411	ENSG00000196476	C20orf96	140680	699.968	0.127496	0.357051	0.357081	0.721031	0.879934
ENSMAUG00000000592	5730480H06Rik	6331508	6351885	101824944	parkin coregulated like [Source:NCBI gene;Acc:101824944]	protein_coding			5730480H06Rik	101824944	ENSG00000163138	PACRGL	133015	303.782	0.10538	0.107844	0.977149	0.328495	0.683762
ENSMAUG00000000593	Ptprk	4749489	5143756	101844077	protein tyrosine phosphatase receptor type K [Source:NCBI gene;Acc:101844077]	protein_coding			Ptprk	101844077	ENSG00000152894	PTPRK	5796	2744.8	-0.0149508	0.187807	-0.0796074	0.93655	0.975061
ENSMAUG00000000594	Hsd17b13	3652792	3678765	101827337	17-beta-hydroxysteroid dehydrogenase 13 [Source:NCBI gene;Acc:101827337]	protein_coding			Hsd17b13	101827337	ENSG00000170509	HSD17B13	345275	1197.87	0.110937	0.315633	0.351475	0.725232	0.882041
ENSMAUG00000000595	Dnajc28	6298653	6301115	101828549	DnaJ heat shock protein family (Hsp40) member C28 [Source:NCBI gene;Acc:101828549]	protein_coding			Dnajc28	101828549	ENSG00000177692	DNAJC28	54943	114.886	0.1647	0.144049	1.14336	0.252891	0.641619
ENSMAUG00000000598	CERK	3551	11018	101825724	ceramide kinase [Source:NCBI gene;Acc:101825724]	protein_coding				101825724	ENSG00000100422	CERK	64781	4514.95	0.196065	0.1329	1.47529	0.140135	0.588021
ENSMAUG00000000599	MDM4	307394	366366			protein_coding					ENSG00000198625	MDM4	4194	84.2044	0.430782	0.31154	1.38275	0.166741	0.607348
ENSMAUG00000000600	TMEM14C	2318680	2319024	101837285	transmembrane protein 14C-like [Source:NCBI gene;Acc:101837285]	protein_coding				101837285	ENSG00000111843	TMEM14C	51522	1007.67	0.0186109	0.113034	0.164649	0.86922	0.946478
ENSMAUG00000000602	Zfhx3	1420459	1578122		zinc finger homeobox 3 [Source:MGI Symbol;Acc:MGI:99948]	protein_coding			Zfhx3		ENSG00000140836	ZFHX3	463	664.983	0.236576	0.301543	0.784549	0.432718	0.737986
ENSMAUG00000000603	Slc19a3	3542782	3562196	101833959	solute carrier family 19 member 3 [Source:NCBI gene;Acc:101833959]	protein_coding			Slc19a3	101833959	ENSG00000135917	SLC19A3	80704	678.697	0.559518	0.218354	2.56244	0.010394	0.312033
ENSMAUG00000000604	Scn1b	5176771	5186162	101831789	sodium voltage-gated channel beta subunit 1 [Source:NCBI gene;Acc:101831789]	protein_coding			Scn1b	101831789	ENSG00000105711	SCN1B	6324	469.571	-0.226237	0.217222	-1.0415	0.297645	0.666386
ENSMAUG00000000605	Ntm	543132	1512989	101838682	neurotrimin [Source:NCBI gene;Acc:101838682]	protein_coding			Ntm	101838682	ENSG00000182667	NTM	50863	191.354	-0.614328	0.233376	-2.63235	0.00847968	0.291439
ENSMAUG00000000606	Klc4	10895518	10909773	101844553	kinesin light chain 4 [Source:NCBI gene;Acc:101844553]	protein_coding			Klc4	101844553	ENSG00000137171	KLC4	89953	3961.41	-0.216529	0.15101	-1.43388	0.151607	0.596933
ENSMAUG00000000610	Akap3	1742186	1761384	101834228	A-kinase anchoring protein 3 [Source:NCBI gene;Acc:101834228]	protein_coding			Akap3	101834228	ENSG00000111254	AKAP3	10566	379.515	-0.211552	0.0992108	-2.13235	0.0329783	0.464645
ENSMAUG00000000611	Gfm1	10017253	10058778	101823398	G elongation factor mitochondrial 1 [Source:NCBI gene;Acc:101823398]	protein_coding			Gfm1	101823398	ENSG00000168827	GFM1	85476	1782.04	0.089094	0.0760215	1.17196	0.241214	0.6341
ENSMAUG00000000612	Dnajc14	2830924	2840273	101842984	DnaJ heat shock protein family (Hsp40) member C14 [Source:NCBI gene;Acc:101842984]	protein_coding								5115.03	0.00474373	0.0513164	0.0924408	0.926348	0.971384
ENSMAUG00000000613	A2ml1	3475690	3533628	101822348	ovostatin homolog [Source:NCBI gene;Acc:101822348]	protein_coding								139.788	-1.39108	1.32377	-1.05085	0.293327	0.663203
ENSMAUG00000000614	Uchl1	2911021	2920718	101824441	ubiquitin C-terminal hydrolase L1 [Source:NCBI gene;Acc:101824441]	protein_coding			Uchl1	101824441	ENSG00000154277	UCHL1	7345	82.8053	-0.903091	0.727773	-1.2409	0.214644	0.621679
ENSMAUG00000000615	Tubb1	8359307	8361356	101836899	tubulin beta 1 class VI [Source:NCBI gene;Acc:101836899]	protein_coding			Tubb1	101836899	ENSG00000101162	TUBB1	81027	1159.4	0.119689	0.396976	0.301502	0.763032	0.898522
ENSMAUG00000000616	Ptpro	4778414	4977431	101829612	protein tyrosine phosphatase receptor type O [Source:NCBI gene;Acc:101829612]	protein_coding			Ptpro	101829612	ENSG00000151490	PTPRO	5800	1438.69	0.12101	0.182227	0.664062	0.50665	0.778878
ENSMAUG00000000617	RNF220	3988439	4022828			protein_coding					ENSG00000187147	RNF220	55182	6042.27	-0.151451	0.0941231	-1.60908	0.107599	0.567727
ENSMAUG00000000619	Fer1l5	8604581	8654504		fer-1-like 5 (C. elegans) [Source:MGI Symbol;Acc:MGI:3616091]	protein_coding			Fer1l5		ENSG00000249715	FER1L5	90342	78.1713	0.426169	0.421092	1.01206	0.311512	0.675703
ENSMAUG00000000620	Gpr75	271147	278840	101842604	G protein-coupled receptor 75 [Source:NCBI gene;Acc:101842604]	protein_coding			Gpr75	101842604	ENSG00000119737	GPR75	10936	113.471	-0.0547665	0.20232	-0.270692	0.786628	0.908933
ENSMAUG00000000621	Myh4	227	21289	101823448	myosin-4 [Source:NCBI gene;Acc:101823448]	protein_coding								17.3629	-0.701112	1.19413	-0.587133
ENSMAUG00000000622	NDUFAB1	3518189	3518637			protein_coding					ENSG00000004779	NDUFAB1	4706	339.936	0.00701349	0.157555	0.0445145	0.964494	0.98631
ENSMAUG00000000623	St6galnac5	3991626	4129949	101833546	ST6 N-acetylgalactosaminide alpha-2,6-sialyltransferase 5 [Source:NCBI gene;Acc:101833546]	protein_coding			St6galnac5	101833546	ENSG00000117069	ST6GALNAC5	81849	57.061	-0.343471	0.384369	-0.893596	0.371538	0.705095
ENSMAUG00000000624	Zcchc12	3353630	3356443	101834501	zinc finger CCHC-type containing 12 [Source:NCBI gene;Acc:101834501]	protein_coding								372.881	0.28356	0.186171	1.52311	0.12773	0.579731
ENSMAUG00000000625	Slc39a2	1035471	1037275	101839442	solute carrier family 39 member 2 [Source:NCBI gene;Acc:101839442]	protein_coding			Slc39a2	101839442	ENSG00000165794	SLC39A2	29986	8.28401	-0.210817	0.559137	-0.377039	0.706145	0.874212
ENSMAUG00000000626	Pcca	7483875	7784901		propionyl-Coenzyme A carboxylase, alpha polypeptide [Source:MGI Symbol;Acc:MGI:97499]	protein_coding			Pcca		ENSG00000175198	PCCA	5095	971.229	0.101492	0.0781111	1.29933	0.193832	0.615984
ENSMAUG00000000627	Nceh1	20552410	20651473	101827136	neutral cholesterol ester hydrolase 1 [Source:NCBI gene;Acc:101827136]	protein_coding			Nceh1	101827136	ENSG00000144959	NCEH1	57552	2836.46	0.248409	0.0826452	3.00572	0.00264951	0.179605
ENSMAUG00000000628	Zfp706	14174560	14183421	101842693	zinc finger protein 706 [Source:NCBI gene;Acc:101842693]	protein_coding			Zfp706	101842693	ENSG00000120963	ZNF706	51123	4781.78	-0.179049	0.0643554	-2.78219	0.00539934	0.239537
ENSMAUG00000000629	Ube2t	2257065	2265386	101826881	ubiquitin conjugating enzyme E2 T [Source:NCBI gene;Acc:101826881]	protein_coding			Ube2t	101826881	ENSG00000077152	UBE2T	29089	188.656	-0.191526	0.244356	-0.783799	0.433158	0.73812
ENSMAUG00000000632	Anp32a	9407015	9444041	101835772	acidic nuclear phosphoprotein 32 family member A [Source:NCBI gene;Acc:101835772]	protein_coding								5821.96	-0.143904	0.0911039	-1.57956	0.114208	0.569876
ENSMAUG00000000633	Nmd3	208685	237648	101842396	NMD3 ribosome export adaptor [Source:NCBI gene;Acc:101842396]	protein_coding			Nmd3	101842396	ENSG00000169251	NMD3	51068	1329.57	0.0849441	0.0563432	1.50762	0.131652	0.580307
ENSMAUG00000000634	Mcemp1	374581	377564		mast cell expressed membrane protein 1 [Source:MGI Symbol;Acc:MGI:1916439]	protein_coding			Mcemp1		ENSG00000183019	MCEMP1	199675	1931.34	-0.0603952	0.296197	-0.203902	0.83843	0.932963
ENSMAUG00000000635	Phaf1	495314	523332	101844302	chromosome unknown C16orf70 homolog [Source:NCBI gene;Acc:101844302]	protein_coding			Phaf1	101844302	ENSG00000125149	PHAF1	80262	620.302	0.152314	0.0939245	1.62167	0.104875	0.565772
ENSMAUG00000000636	Mstn	2206514	2211604	101826137	myostatin [Source:NCBI gene;Acc:101826137]	protein_coding			Mstn	101826137	ENSG00000138379	MSTN	2660	16.3141	0.627329	0.620831	1.01047	0.312272	0.676179
ENSMAUG00000000637	Tnr	8740514	8834507	101841265	tenascin R [Source:NCBI gene;Acc:101841265]	protein_coding			Tnr	101841265	ENSG00000116147	TNR	7143	4.92862	-1.25856	0.736978	-1.70773	0.0876856	0.549731
ENSMAUG00000000640	Slc9b2	4147395	4186859	101840307	solute carrier family 9 member B2 [Source:NCBI gene;Acc:101840307]	protein_coding			Slc9b2	101840307	ENSG00000164038	SLC9B2	133308	22.8405	0.206447	0.375514	0.549773	0.582475	0.817094
ENSMAUG00000000641	Alad	13293824	13298804		aminolevulinate, delta-, dehydratase [Source:MGI Symbol;Acc:MGI:96853]	protein_coding			Alad		ENSG00000148218	ALAD	210	1740	-0.114185	0.21219	-0.538126	0.59049	0.82073
ENSMAUG00000000642	Rab17	1679470	1689536	101826735	RAB17, member RAS oncogene family [Source:NCBI gene;Acc:101826735]	protein_coding			Rab17	101826735	ENSG00000124839	RAB17	64284	66.5849	0.0803957	0.326864	0.245961	0.805713	0.917903
ENSMAUG00000000643	Hbb-y	46291	47591		hemoglobin Y, beta-like embryonic chain [Source:MGI Symbol;Acc:MGI:96027]	protein_coding			Hbb-y		ENSG00000213931	HBE1	3046	3846.75	1.1814	0.490827	2.40696	0.0160858	0.36371
ENSMAUG00000000644	Mpo	317584	327392	101830171	myeloperoxidase [Source:NCBI gene;Acc:101830171]	protein_coding			Mpo	101830171	ENSG00000005381	MPO	4353	25.9158	-0.865422	0.998929	-0.86635	0.386298	0.713628
ENSMAUG00000000645	ISCA1	6127765	6139565			protein_coding					ENSG00000135070	ISCA1	81689	919.603	-0.0109002	0.0979662	-0.111265	0.911406	0.965767
ENSMAUG00000000647	Ktn1	291659	370611		kinectin 1 [Source:MGI Symbol;Acc:MGI:109153]	protein_coding			Ktn1		ENSG00000126777	KTN1	3895	5742.78	0.042628	0.106053	0.401949	0.687722	0.865044
ENSMAUG00000000648	Dnpep	3654820	3664567	101838215	aspartyl aminopeptidase [Source:NCBI gene;Acc:101838215]	protein_coding			Dnpep	101838215	ENSG00000123992	DNPEP	23549	3949.17	-0.134772	0.153904	-0.875689	0.381199	0.711243
ENSMAUG00000000649	Apold1	2543561	2548288	101844291	apolipoprotein L domain containing 1 [Source:NCBI gene;Acc:101844291]	protein_coding			Apold1	101844291	ENSG00000178878	APOLD1	81575	585.919	0.369341	0.289868	1.27417	0.202604	0.619742
ENSMAUG00000000650	ATP5PD	555	4027		ATP synthase, H+ transporting, mitochondrial F0 complex, subunit D [Source:MGI Symbol;Acc:MGI:1918929]	protein_coding					ENSG00000167863	ATP5PD	10476	7092.14	-0.221223	0.171785	-1.28779	0.197818	0.619153
ENSMAUG00000000651	Adgre1	5578925	5668289		adhesion G protein-coupled receptor E1 [Source:MGI Symbol;Acc:MGI:106912]	protein_coding			Adgre1		ENSG00000174837	ADGRE1	2015	525.176	0.29794	0.349958	0.851359	0.39457	0.71605
ENSMAUG00000000652	Rarb	8092478	8231541	101838607	retinoic acid receptor beta [Source:NCBI gene;Acc:101838607]	protein_coding			Rarb	101838607	ENSG00000077092	RARB	5915	600.201	-0.122554	0.269379	-0.454952	0.649144	0.848083
ENSMAUG00000000653	RUBCNL	1331	11336	101837047	protein RUBCNL-like [Source:NCBI gene;Acc:101837047]	protein_coding				101837047	ENSG00000102445	RUBCNL	80183	149.606	0.0873298	0.239159	0.365154	0.714996	0.877455
ENSMAUG00000000654	Ctnnbl1	5355957	5524060	101829025	catenin beta like 1 [Source:NCBI gene;Acc:101829025]	protein_coding			Ctnnbl1	101829025	ENSG00000132792	CTNNBL1	56259	2079.39	-0.16532	0.113515	-1.45637	0.14529	0.592664
ENSMAUG00000000655	Vti1b	4772558	4787698	101825740	vesicle transport through interaction with t-SNAREs 1B [Source:NCBI gene;Acc:101825740]	protein_coding			Vti1b	101825740	ENSG00000100568	VTI1B	10490	2725.91	-0.159435	0.127128	-1.25413	0.209796	0.621679
ENSMAUG00000000656	Ctif	1349161	1531459	101830446	cap binding complex dependent translation initiation factor [Source:NCBI gene;Acc:101830446]	protein_coding			Ctif	101830446	ENSG00000134030	CTIF	9811	1036.97	0.290592	0.274385	1.05907	0.289569	0.660562
ENSMAUG00000000657	Idh3g	769275	777696	101834690	isocitrate dehydrogenase (NAD(+)) 3 non-catalytic subunit gamma [Source:NCBI gene;Acc:101834690]	protein_coding			Idh3g	101834690	ENSG00000067829	IDH3G	3421	3518.57	-0.0610302	0.11604	-0.525942	0.598928	0.825047
ENSMAUG00000000659	Mrps31	25583	38328		mitochondrial ribosomal protein S31 [Source:MGI Symbol;Acc:MGI:1913153]	protein_coding			Mrps31		ENSG00000102738	MRPS31	10240	843.355	0.0470453	0.0872115	0.539439	0.589584	0.820646
ENSMAUG00000000661	Ctsv	9216807	9222171	101825242	cathepsin V [Source:NCBI gene;Acc:101825242]	protein_coding			Ctsv	101825242	ENSG00000136943	CTSV	1515	7848.34	0.00187078	0.193238	0.00968126	0.992276	0.997394
ENSMAUG00000000662	Hdhd5	3109599	3128242	101830214	haloacid dehalogenase like hydrolase domain containing 5 [Source:NCBI gene;Acc:101830214]	protein_coding			Hdhd5	101830214	ENSG00000069998	HDHD5	27440	945.784	-0.242661	0.130772	-1.8556	0.0635107	0.525066
ENSMAUG00000000664	Ptbp3	2559887	2646932	101844601	polypyrimidine tract binding protein 3 [Source:NCBI gene;Acc:101844601]	protein_coding			Ptbp3	101844601	ENSG00000119314	PTBP3	9991	619.527	0.823272	0.571385	1.44084	0.149631	0.59542
ENSMAUG00000000665	Col8a2	3494650	3517963	101837375	collagen type VIII alpha 2 chain [Source:NCBI gene;Acc:101837375]	protein_coding			Col8a2	101837375	ENSG00000171812	COL8A2	1296	1772.33	-0.0114394	0.218958	-0.0522447	0.958334	0.983565
ENSMAUG00000000666	Abhd5	1669421	1695698	101834576	abhydrolase domain containing 5 [Source:NCBI gene;Acc:101834576]	protein_coding			Abhd5	101834576	ENSG00000011198	ABHD5	51099	4042.88	0.00811094	0.160103	0.0506608	0.959596	0.983875
ENSMAUG00000000668	Ppp3cc	18769732	18839943	101833150	protein phosphatase 3 catalytic subunit gamma [Source:NCBI gene;Acc:101833150]	protein_coding			Ppp3cc	101833150	ENSG00000120910	PPP3CC	5533	895.641	0.0107996	0.0953878	0.113218	0.909858	0.96503
ENSMAUG00000000669	Hoxa9	542903	547152	101827109	homeobox A9 [Source:NCBI gene;Acc:101827109]	protein_coding								13.7164	0.487559	0.517187	0.942713	0.345828	0.691681
ENSMAUG00000000670	RTN2	94	2076	101837672	reticulon-2 [Source:NCBI gene;Acc:101837672]	protein_coding				101837672	ENSG00000125744	RTN2	6253	68.1436	0.0647169	0.276886	0.233731	0.815194	0.92226
ENSMAUG00000000671	Pik3cg	10700882	10729393	101833768	phosphatidylinositol-4,5-bisphosphate 3-kinase catalytic subunit gamma [Source:NCBI gene;Acc:101833768]	protein_coding			Pik3cg	101833768	ENSG00000105851	PIK3CG	5294	406.233	0.460848	0.437989	1.05219	0.292712	0.662478
ENSMAUG00000000673	Kcnn3	6088630	6235658	101841744	potassium calcium-activated channel subfamily N member 3 [Source:NCBI gene;Acc:101841744]	protein_coding			Kcnn3	101841744	ENSG00000143603	KCNN3	3782	466.489	0.281841	0.332728	0.847063	0.39696	0.716455
ENSMAUG00000000674	Dmap1	3608314	3617331	101835197	DNA methyltransferase 1 associated protein 1 [Source:NCBI gene;Acc:101835197]	protein_coding			Dmap1	101835197	ENSG00000178028	DMAP1	55929	1415.87	-0.133235	0.149003	-0.894172	0.37123	0.704891
ENSMAUG00000000675	Srek1ip1	8812393	8833994	101829668	SREK1 interacting protein 1 [Source:NCBI gene;Acc:101829668]	protein_coding			Srek1ip1	101829668	ENSG00000153006	SREK1IP1	285672	799.126	-0.274446	0.179797	-1.52642	0.126905	0.579549
ENSMAUG00000000676	Ccdc60	4769162	4915308	101828570	coiled-coil domain containing 60 [Source:NCBI gene;Acc:101828570]	protein_coding			Ccdc60	101828570	ENSG00000183273	CCDC60	160777	126.82	0.35736	0.389002	0.918659	0.358274	0.696977
ENSMAUG00000000677	Slc31a1	13398508	13402256	101841993	solute carrier family 31 member 1 [Source:NCBI gene;Acc:101841993]	protein_coding			Slc31a1	101841993	ENSG00000136868	SLC31A1	1317	2724.34	0.0319877	0.241954	0.132206	0.894822	0.958928
ENSMAUG00000000678	Btnl9	2678041	2692082		butyrophilin-like 9 [Source:MGI Symbol;Acc:MGI:2442439]	protein_coding			Btnl9		ENSG00000165810	BTNL9	153579	46.8561	0.552474	0.406038	1.36065	0.173626	0.610913
ENSMAUG00000000679	Usp44	7287162	7301913		ubiquitin specific peptidase 44 [Source:MGI Symbol;Acc:MGI:3045318]	protein_coding			Usp44		ENSG00000136014	USP44	84101	5.0874	-0.286005	0.716349	-0.399253	0.689706	0.86559
ENSMAUG00000000680	PREX2	6992663	7007779			protein_coding					ENSG00000046889	PREX2	80243	201.657	0.254846	0.554388	0.459689	0.64574	0.846155
ENSMAUG00000000682	Tab3	3170928	3224579	101826555	TGF-beta activated kinase 1 (MAP3K7) binding protein 3 [Source:NCBI gene;Acc:101826555]	protein_coding			Tab3	101826555	ENSG00000157625	TAB3	257397	688.211	0.319923	0.209906	1.52413	0.127477	0.579549
ENSMAUG00000000684	Rnf5	585428	587719	101833125	ring finger protein 5 [Source:NCBI gene;Acc:101833125]	protein_coding			Rnf5	101833125	ENSG00000204308	RNF5	6048	4996.89	-0.288608	0.157577	-1.83153	0.0670212	0.525807
ENSMAUG00000000686	RHOT2	1160553	1162369			protein_coding					ENSG00000140983	RHOT2	89941	551.103	-0.130467	0.111684	-1.16818	0.242735	0.635194
ENSMAUG00000000687	Trat1	6593324	6625413		T cell receptor associated transmembrane adaptor 1 [Source:MGI Symbol;Acc:MGI:1924897]	protein_coding			Trat1		ENSG00000163519	TRAT1	50852	19.1865	-0.403486	0.478273	-0.843632	0.398875	0.717994
ENSMAUG00000000688	TUBA1A	1715392	1716734			protein_coding					ENSG00000167552	TUBA1A	7846	647.998	-0.348664	0.163833	-2.12816	0.033324	0.465053
ENSMAUG00000000689	Dtnbp1	8086699	8177653	101841048	dystrobrevin binding protein 1 [Source:NCBI gene;Acc:101841048]	protein_coding			Dtnbp1	101841048	ENSG00000047579	DTNBP1	84062	1009.9	-0.12501	0.143155	-0.873248	0.382528	0.711933
ENSMAUG00000000690	VLDLR	1100	23493	101842766	very low-density lipoprotein receptor [Source:NCBI gene;Acc:101842766]	protein_coding				101842766	ENSG00000147852	VLDLR	7436	894.24	0.124683	0.380326	0.327832	0.743039	0.890351
ENSMAUG00000000691	Lactb	4793372	4810326	101840377	lactamase beta [Source:NCBI gene;Acc:101840377]	protein_coding			Lactb	101840377	ENSG00000103642	LACTB	114294	995.754	0.13209	0.125013	1.0566	0.290692	0.660562
ENSMAUG00000000692	Ctsz	8332335	8341687	101836619	cathepsin Z [Source:NCBI gene;Acc:101836619]	protein_coding			Ctsz	101836619	ENSG00000101160	CTSZ	1522	25449.2	-0.083482	0.18674	-0.447049	0.65484	0.849634
ENSMAUG00000000694	Grk5	2398549	2592414	101834234	G protein-coupled receptor kinase 5 [Source:NCBI gene;Acc:101834234]	protein_coding			Grk5	101834234	ENSG00000198873	GRK5	2869	5750.33	-0.0999444	0.248308	-0.402502	0.687315	0.865024
ENSMAUG00000000695	Brd7	6392145	6435320	101838873	bromodomain containing 7 [Source:NCBI gene;Acc:101838873]	protein_coding			Brd7	101838873	ENSG00000166164	BRD7	29117	4309.26	-0.0757118	0.0930072	-0.814043	0.415621	0.728959
ENSMAUG00000000697	Ccdc160	666860	675281	101844246	coiled-coil domain containing 160 [Source:NCBI gene;Acc:101844246]	protein_coding			Ccdc160	101844246	ENSG00000203952	CCDC160	347475	18.588	0.160568	0.364733	0.440235	0.659767	0.851795
ENSMAUG00000000698	Timm17a	2597488	2612625	101829344	translocase of inner mitochondrial membrane 17A [Source:NCBI gene;Acc:101829344]	protein_coding			Timm17a	101829344	ENSG00000134375	TIMM17A	10440	1226.27	-0.0580173	0.131941	-0.439722	0.660138	0.852054
ENSMAUG00000000699	Ptpn13	3133301	3272857		protein tyrosine phosphatase, non-receptor type 13 [Source:MGI Symbol;Acc:MGI:103293]	protein_coding			Ptpn13		ENSG00000163629	PTPN13	5783	5594.65	0.193631	0.213288	0.907839	0.363963	0.700061
ENSMAUG00000000700	Fam234b	2753351	2803929	101823106	family with sequence similarity 234 member B [Source:NCBI gene;Acc:101823106]	protein_coding			Fam234b	101823106	ENSG00000084444	FAM234B	57613	2327.88	-0.102754	0.0996227	-1.03143	0.302341	0.669491
ENSMAUG00000000701	Bri3	1511826	1520866	101836384	brain protein I3 [Source:NCBI gene;Acc:101836384]	protein_coding			Bri3	101836384	ENSG00000164713	BRI3	25798	6715.83	-0.294513	0.15243	-1.93212	0.0533444	0.50972
ENSMAUG00000000702	Ash1l	5514384	5615647		ASH1 like histone lysine methyltransferase [Source:MGI Symbol;Acc:MGI:2183158]	protein_coding			Ash1l		ENSG00000116539	ASH1L	55870	860.17	0.693068	0.414758	1.67102	0.094718	0.559622
ENSMAUG00000000703	4930503L19Rik	3466538	3482653	101822581	chromosome unknown C18orf54 homolog [Source:NCBI gene;Acc:101822581]	protein_coding			4930503L19Rik	101822581	ENSG00000166845	C18orf54	162681	91.0763	-0.12799	0.227107	-0.563564	0.573051	0.812232
ENSMAUG00000000706	Klf3	4768623	4797177	101830521	Kruppel like factor 3 [Source:NCBI gene;Acc:101830521]	protein_coding			Klf3	101830521	ENSG00000109787	KLF3	51274	4705.56	0.263955	0.245561	1.0749	0.282417	0.659213
ENSMAUG00000000707	Ppcs	1411	5068	101825463	phosphopantothenoylcysteine synthetase [Source:NCBI gene;Acc:101825463]	protein_coding			Ppcs	101825463	ENSG00000127125	PPCS	79717	777.18	0.0645425	0.137965	0.467816	0.639916	0.843342
ENSMAUG00000000708	Slc49a4	4637618	4685820		solute carrier family 49 member 4 [Source:MGI Symbol;Acc:MGI:2387188]	protein_coding			Slc49a4		ENSG00000138463	SLC49A4	84925	848.007	-0.0550703	0.0895774	-0.614779	0.5387	0.794363
ENSMAUG00000000709	Magee1	4676	7561	101833721	MAGE family member E1 [Source:NCBI gene;Acc:101833721]	protein_coding			Magee1	101833721	ENSG00000198934	MAGEE1	57692	78.7063	-0.112845	0.240169	-0.469857	0.638457	0.842443
ENSMAUG00000000710	Prune1	3179355	3211739		prune exopolyphosphatase [Source:MGI Symbol;Acc:MGI:1925152]	protein_coding			Prune1		ENSG00000143363	PRUNE1	58497	523.878	0.40786	0.137058	2.97581	0.00292215	0.18548
ENSMAUG00000000711	Mrpl48	11186727	11234728	101835072	mitochondrial ribosomal protein L48 [Source:NCBI gene;Acc:101835072]	protein_coding			Mrpl48	101835072	ENSG00000175581	MRPL48	51642	1105.67	-0.112574	0.125642	-0.895992	0.370257	0.703942
ENSMAUG00000000713	Thnsl2	11508472	11523563		threonine synthase-like 2 (bacterial) [Source:MGI Symbol;Acc:MGI:3041254]	protein_coding			Thnsl2		ENSG00000144115	THNSL2	55258	527.743	0.140633	0.149101	0.943207	0.345575	0.691681
ENSMAUG00000000714	Eef1akmt1	10953821	10962648	101829711	EEF1A lysine methyltransferase 1 [Source:NCBI gene;Acc:101829711]	protein_coding			Eef1akmt1	101829711	ENSG00000150456	EEF1AKMT1	221143	810.127	-0.0798925	0.160888	-0.496573	0.61949	0.834807
ENSMAUG00000000715	Szt2	2868675	2914163	101828229	SZT2 subunit of KICSTOR complex [Source:NCBI gene;Acc:101828229]	protein_coding			Szt2	101828229	ENSG00000198198	SZT2	23334	8133.99	0.0159462	0.173105	0.0921189	0.926604	0.971538
ENSMAUG00000000717	Slc17a7	1634395	1647203	101826667	solute carrier family 17 member 7 [Source:NCBI gene;Acc:101826667]	protein_coding			Slc17a7	101826667	ENSG00000104888	SLC17A7	57030	78.3811	-0.206157	0.983913	-0.209527	0.834037	0.930538
ENSMAUG00000000719	Serpinb8	2226666	2243617	101830895	serpin family B member 8 [Source:NCBI gene;Acc:101830895]	protein_coding			Serpinb8	101830895	ENSG00000166401	SERPINB8	5271	3088.91	0.125533	0.170779	0.735063	0.462301	0.751098
ENSMAUG00000000720	Zfp654	12215766	12269721	101826541	zinc finger protein 654 [Source:NCBI gene;Acc:101826541]	protein_coding			Zfp654	101826541	ENSG00000175105	ZNF654	55279	298.742	0.640791	0.417087	1.53635	0.124453	0.577628
ENSMAUG00000000721	CBR1	4230884	4235812			protein_coding					ENSG00000159228	CBR1	873	920.269	-0.0488409	0.10418	-0.468811	0.639205	0.842939
ENSMAUG00000000722	OTUB1	10414251	10415064			protein_coding					ENSG00000167770	OTUB1	55611	74.0561	0.15207	0.197634	0.769449	0.441627	0.741619
ENSMAUG00000000723	Popdc3	20336523	20366248	101840537	popeye domain containing 3 [Source:NCBI gene;Acc:101840537]	protein_coding			Popdc3	101840537	ENSG00000132429	POPDC3	64208	8.92745	-0.107312	0.700865	-0.153113	0.878309	0.950204
ENSMAUG00000000724	Ercc2	655513	664909		excision repair cross-complementing rodent repair deficiency, complementation group 2 [Source:MGI Symbol;Acc:MGI:95413]	protein_coding			Ercc2		ENSG00000104884	ERCC2	2068	2068	-0.15232	0.156303	-0.974511	0.329803	0.684407
ENSMAUG00000000725	Mpz	319707	325239	101838457	myelin protein zero [Source:NCBI gene;Acc:101838457]	protein_coding			Mpz	101838457	ENSG00000158887	MPZ	4359	177.196	0.108323	0.191497	0.565661	0.571624	0.811378
ENSMAUG00000000726	Sesn2	5599997	5620171	101844942	sestrin 2 [Source:NCBI gene;Acc:101844942]	protein_coding			Sesn2	101844942	ENSG00000130766	SESN2	83667	423.792	-0.113414	0.172029	-0.659271	0.509722	0.779621
ENSMAUG00000000727	Xpo7	18327973	18419069	101836800	exportin 7 [Source:NCBI gene;Acc:101836800]	protein_coding			Xpo7	101836800	ENSG00000130227	XPO7	23039	2910.23	0.145837	0.143753	1.0145	0.310343	0.675013
ENSMAUG00000000728	Smpd3	11655990	11668639	101835858	sphingomyelin phosphodiesterase 3 [Source:NCBI gene;Acc:101835858]	protein_coding			Smpd3	101835858	ENSG00000103056	SMPD3	55512	831.803	1.60001	0.743599	2.15171	0.0314204	0.460173
ENSMAUG00000000730	EEF1D	548028	556204			protein_coding					ENSG00000104529	EEF1D	1936	11643.9	-0.0943997	0.181235	-0.520868	0.602459	0.826842
ENSMAUG00000000731	Matn3	4301712	4320782		matrilin 3 [Source:MGI Symbol;Acc:MGI:1328350]	protein_coding			Matn3		ENSG00000132031	MATN3	4148	15.8151	0.102714	0.513291	0.200108	0.841396	0.934436
ENSMAUG00000000733	Abca2	1879049	1899411	101824906	ATP binding cassette subfamily A member 2 [Source:NCBI gene;Acc:101824906]	protein_coding			Abca2	101824906	ENSG00000107331	ABCA2	20	4686.06	-0.0387639	0.21472	-0.180533	0.856734	0.94014
ENSMAUG00000000734	CINP	5019912	5031265	101829240	cyclin dependent kinase 2 interacting protein [Source:NCBI gene;Acc:101829240]	protein_coding				101829240	ENSG00000100865	CINP	51550	1300.1	0.00189709	0.0669471	0.0283372	0.977393	0.991822
ENSMAUG00000000735	Zfp354a	807866	813564		zinc finger protein 354A [Source:MGI Symbol;Acc:MGI:103172]	protein_coding								82.8332	0.190756	0.224905	0.848162	0.396348	0.71637
ENSMAUG00000000736	Cfl2	2612883	2615685	101841292	cofilin 2 [Source:NCBI gene;Acc:101841292]	protein_coding			Cfl2	101841292	ENSG00000165410	CFL2	1073	522.31	0.239165	0.174993	1.36671	0.171716	0.609353
ENSMAUG00000000738	Mboat7	3119802	3134157	101833711	membrane bound O-acyltransferase domain containing 7 [Source:NCBI gene;Acc:101833711]	protein_coding			Mboat7	101833711	ENSG00000125505	MBOAT7	79143	3250.95	-0.157486	0.130215	-1.20943	0.226499	0.626104
ENSMAUG00000000739	Hnrnpc	812406	836225	101835823	heterogeneous nuclear ribonucleoprotein C [Source:NCBI gene;Acc:101835823]	protein_coding								11800.5	-0.115158	0.0777652	-1.48084	0.138648	0.58708
ENSMAUG00000000741	ALG14	6004163	6030805			protein_coding					ENSG00000172339	ALG14	199857	400.284	0.108517	0.128928	0.841684	0.399965	0.718531
ENSMAUG00000000742	Crybb1	855989	868139	101840031	crystallin beta B1 [Source:NCBI gene;Acc:101840031]	protein_coding			Crybb1	101840031	ENSG00000100122	CRYBB1	1414	17.5803	0.0859291	0.437041	0.196616	0.844128	0.935659
ENSMAUG00000000743	Gpr101	1353227	1361227	101836241	G protein-coupled receptor 101 [Source:NCBI gene;Acc:101836241]	protein_coding			Gpr101	101836241	ENSG00000165370	GPR101	83550	106.163	0.734487	0.427657	1.71747	0.0858941	0.547793
ENSMAUG00000000744	Sult6b1	14270791	14284860	101836450	sulfotransferase family 6B member 1 [Source:NCBI gene;Acc:101836450]	protein_coding			Sult6b1	101836450	ENSG00000138068	SULT6B1	391365	20.1181	-0.0214305	0.486058	-0.0440904	0.964832	0.98631
ENSMAUG00000000745	Terf2	12490006	12524095		telomeric repeat binding factor 2 [Source:MGI Symbol;Acc:MGI:1195972]	protein_coding			Terf2		ENSG00000132604	TERF2	7014	642.652	-0.0662763	0.0667684	-0.992631	0.32089	0.678943
ENSMAUG00000000746	Prss30	3069690	3072190	101838956	serine protease 30-like [Source:NCBI gene;Acc:101838956]	protein_coding								85.0856	0.448443	0.779107	0.575586	0.564895	0.808406
ENSMAUG00000000747	Egr3	18978561	18984011	101844548	early growth response 3 [Source:NCBI gene;Acc:101844548]	protein_coding			Egr3	101844548	ENSG00000179388	EGR3	1960	90.1385	0.459213	0.37499	1.2246	0.220726	0.62452
ENSMAUG00000000748	Pgm3	1765638	1786530	101835765	phosphoglucomutase 3 [Source:NCBI gene;Acc:101835765]	protein_coding			Pgm3	101835765	ENSG00000013375	PGM3	5238	988.354	0.0152148	0.126845	0.119947	0.904525	0.962497
ENSMAUG00000000749	Barhl1	2153798	2160507	101836328	BarH like homeobox 1 [Source:NCBI gene;Acc:101836328]	protein_coding			Barhl1	101836328	ENSG00000125492	BARHL1	56751	73.0563	0.371303	0.461436	0.80467	0.42101	0.731946
ENSMAUG00000000751	Adck2	1276821	1287474	101823773	aarF domain containing kinase 2 [Source:NCBI gene;Acc:101823773]	protein_coding			Adck2	101823773	ENSG00000133597	ADCK2	90956	1070.52	-0.241609	0.152042	-1.58909	0.11204	0.569642
ENSMAUG00000000752	Ddx11	249563	269878	101824888	DEAD/H-box helicase 11 [Source:NCBI gene;Acc:101824888]	protein_coding			Ddx11	101824888	ENSG00000013573	DDX11	1663	192.304	-0.335821	0.143238	-2.3445	0.0190525	0.387637
ENSMAUG00000000753	Tmem268	12194437	12216068	101839575	transmembrane protein 268 [Source:NCBI gene;Acc:101839575]	protein_coding			Tmem268	101839575	ENSG00000157693	TMEM268	203197	2304.38	-0.0659883	0.117869	-0.559846	0.575584	0.813728
ENSMAUG00000000754	Ptprr	2546836	2755933		protein tyrosine phosphatase, receptor type, R [Source:MGI Symbol;Acc:MGI:109559]	protein_coding			Ptprr		ENSG00000153233	PTPRR	5801	23.6157	-0.218841	0.375188	-0.583282	0.559704	0.805655
ENSMAUG00000000755	Gfpt2	2052978	2085977	101832975	glutamine-fructose-6-phosphate transaminase 2 [Source:NCBI gene;Acc:101832975]	protein_coding			Gfpt2	101832975	ENSG00000131459	GFPT2	9945	115.503	1.63204	0.454009	3.59472	0.000324736	0.0465611
ENSMAUG00000000756	Fbxl22	5261457	5267266	101842162	F-box and leucine rich repeat protein 22 [Source:NCBI gene;Acc:101842162]	protein_coding			Fbxl22	101842162	ENSG00000197361	FBXL22	283807	447.666	-0.0476216	0.170175	-0.279839	0.779601	0.906316
ENSMAUG00000000757	Dbp	1113949	1119261	101841133	D-box binding PAR bZIP transcription factor [Source:NCBI gene;Acc:101841133]	protein_coding			Dbp	101841133	ENSG00000105516	DBP	1628	2784.14	-3.35694	0.541424	-6.20021	5.63892e-10	5.92489e-07
ENSMAUG00000000758	Cachd1	384264	597010	101843113	cache domain containing 1 [Source:NCBI gene;Acc:101843113]	protein_coding			Cachd1	101843113	ENSG00000158966	CACHD1	57685	2005.45	-0.0519578	0.194895	-0.266594	0.789782	0.910189
ENSMAUG00000000759	Cd163	787059	805854		CD163 antigen [Source:MGI Symbol;Acc:MGI:2135946]	protein_coding			Cd163		ENSG00000177575	CD163	9332	342.535	0.455406	0.539931	0.843452	0.398976	0.718088
ENSMAUG00000000760	Pde10a	433575	643998	101835622	phosphodiesterase 10A [Source:NCBI gene;Acc:101835622]	protein_coding								96.0743	0.0190707	0.274717	0.0694197	0.944656	0.978583
ENSMAUG00000000761	Ank1	580833	760121	101835998	ankyrin 1 [Source:NCBI gene;Acc:101835998]	protein_coding			Ank1	101835998	ENSG00000029534	ANK1	286	200.875	0.16668	0.335267	0.497155	0.61908	0.834708
ENSMAUG00000000762	Cnot9	4358150	4378209	101844545	CCR4-NOT transcription complex subunit 9 [Source:NCBI gene;Acc:101844545]	protein_coding			Cnot9	101844545	ENSG00000144580	CNOT9	9125	1320.27	0.0536825	0.0973537	0.551417	0.581348	0.816608
ENSMAUG00000000763	Dcp1b	4467788	4508247	101835216	decapping mRNA 1B [Source:NCBI gene;Acc:101835216]	protein_coding			Dcp1b	101835216	ENSG00000151065	DCP1B	196513	750.124	0.0222775	0.0839938	0.265228	0.790834	0.910189
ENSMAUG00000000764	Jam3	3286692	3352515	101840298	junctional adhesion molecule 3 [Source:NCBI gene;Acc:101840298]	protein_coding			Jam3	101840298	ENSG00000166086	JAM3	83700	561.487	-0.108883	0.259036	-0.420338	0.674238	0.858294
ENSMAUG00000000765	Zbtb38	6505797	6616455	101832218	zinc finger and BTB domain containing 38 [Source:NCBI gene;Acc:101832218]	protein_coding			Zbtb38	101832218	ENSG00000177311	ZBTB38	253461	755.757	0.679207	0.455487	1.49117	0.135917	0.585818
ENSMAUG00000000766	Mon1b	6537031	6547848		MON1 homolog B, secretory traffciking associated [Source:MGI Symbol;Acc:MGI:1923231]	protein_coding			Mon1b		ENSG00000103111	MON1B	22879	773.523	0.370956	0.236192	1.57057	0.116284	0.57294
ENSMAUG00000000767	St3gal1	5971776	5983315	101828923	ST3 beta-galactoside alpha-2,3-sialyltransferase 1 [Source:NCBI gene;Acc:101828923]	protein_coding			St3gal1	101828923	ENSG00000008513	ST3GAL1	6482	6318.77	-0.158025	0.104794	-1.50796	0.131565	0.580304
ENSMAUG00000000769	Nprl3	625078	656894		nitrogen permease regulator-like 3 [Source:MGI Symbol;Acc:MGI:109258]	protein_coding			Nprl3		ENSG00000103148	NPRL3	8131	246.556	0.0318884	0.109245	0.291897	0.770365	0.901804
ENSMAUG00000000770	Brf1	2932750	2979920	101823363	BRF1 RNA polymerase III transcription initiation factor subunit [Source:NCBI gene;Acc:101823363]	protein_coding			Brf1	101823363	ENSG00000185024	BRF1	2972	2098.86	-0.204305	0.109328	-1.86874	0.0616594	0.523633
ENSMAUG00000000772	Hycc1	273572	381017	101839976	family with sequence similarity 126 member A [Source:NCBI gene;Acc:101839976]	protein_coding			Fam126a	101839976	ENSG00000122591	FAM126A	84668	2013.74	0.0554904	0.158667	0.349729	0.726542	0.883
ENSMAUG00000000773	Ctxn1	813858	815428	101838815	cortexin 1 [Source:NCBI gene;Acc:101838815]	protein_coding			Ctxn1	101838815	ENSG00000178531	CTXN1	404217	1079.54	0.120465	0.264758	0.455002	0.649108	0.848083
ENSMAUG00000000774	Rhog	13018507	13025829	101825060	ras homolog family member G [Source:NCBI gene;Acc:101825060]	protein_coding			Rhog	101825060	ENSG00000177105	RHOG	391	6230.74	-0.2615	0.170394	-1.53468	0.124863	0.577628
ENSMAUG00000000775	Prss56	5457007	5461806	101844952	serine protease 56 [Source:NCBI gene;Acc:101844952]	protein_coding			Prss56	101844952	ENSG00000237412	PRSS56	646960	77.3518	-0.422029	0.252567	-1.67096	0.09473	0.559622
ENSMAUG00000000777	St8sia2	607006	683048	101841497	ST8 alpha-N-acetyl-neuraminide alpha-2,8-sialyltransferase 2 [Source:NCBI gene;Acc:101841497]	protein_coding			St8sia2	101841497	ENSG00000140557	ST8SIA2	8128	29.3303	-0.52342	0.371981	-1.40711	0.159394	0.602563
ENSMAUG00000000778	Mmp27	5538927	5554184	101824450	matrix metalloproteinase-27 [Source:NCBI gene;Acc:101824450]	protein_coding			Mmp27	101824450	ENSG00000137675	MMP27	64066	15.4869	0.288352	0.643422	0.448154	0.654042	0.849083
ENSMAUG00000000779	POLR2C	723820	731117			protein_coding					ENSG00000102978	POLR2C	5432	1188.39	-0.0722633	0.0746543	-0.967973	0.333058	0.686783
ENSMAUG00000000780	Swi5	337369	344634		SWI5 recombination repair homolog (yeast) [Source:MGI Symbol;Acc:MGI:1920181]	protein_coding			Swi5		ENSG00000175854	SWI5	375757	2999.68	-0.143461	0.152682	-0.939611	0.347417	0.692444
ENSMAUG00000000781	Ccl5	4061935	4067729	101832468	C-C motif chemokine ligand 5 [Source:NCBI gene;Acc:101832468]	protein_coding								795.31	0.103324	0.544092	0.189902	0.849386	0.937742
ENSMAUG00000000783	RPL28	5972	7464	101823529	60S ribosomal protein L28 [Source:NCBI gene;Acc:101823529]	protein_coding				101823529	ENSG00000108107	RPL28	6158	19066.3	-0.301209	0.169983	-1.772	0.0763947	0.536916
ENSMAUG00000000785	Pias1	8828367	8938882	101834194	protein inhibitor of activated STAT 1 [Source:NCBI gene;Acc:101834194]	protein_coding			Pias1	101834194	ENSG00000033800	PIAS1	8554	852.574	0.432037	0.227235	1.90128	0.0572659	0.514592
ENSMAUG00000000786	Pbk	2612996	2633223	101837705	PDZ binding kinase [Source:NCBI gene;Acc:101837705]	protein_coding			Pbk	101837705	ENSG00000168078	PBK	55872	65.6176	-0.130356	0.393096	-0.331613	0.740182	0.888632
ENSMAUG00000000787	Avpr1b	190759	198925	101837620	arginine vasopressin receptor 1B [Source:NCBI gene;Acc:101837620]	protein_coding			Avpr1b	101837620	ENSG00000198049	AVPR1B	553	77.2603	-0.0179362	0.334049	-0.0536933	0.95718	0.983248
ENSMAUG00000000789	EIF4E1B	1010890	1011570			protein_coding					ENSG00000175766	EIF4E1B	253314	108.676	-0.0806923	0.301698	-0.26746	0.789115	0.910127
ENSMAUG00000000791	Btbd7	12902430	12948097	101844010	BTB domain containing 7 [Source:NCBI gene;Acc:101844010]	protein_coding			Btbd7	101844010	ENSG00000011114	BTBD7	55727	720.776	0.647098	0.564507	1.14631	0.251669	0.64071
ENSMAUG00000000793	Ncald	13699554	13885096	101842425	neurocalcin delta [Source:NCBI gene;Acc:101842425]	protein_coding			Ncald	101842425	ENSG00000104490	NCALD	83988	1604.49	-0.134776	0.249938	-0.539238	0.589723	0.820646
ENSMAUG00000000794	Lrpap1	19513824	19526285	101842506	LDL receptor related protein associated protein 1 [Source:NCBI gene;Acc:101842506]	protein_coding			Lrpap1	101842506	ENSG00000163956	LRPAP1	4043	4220.48	-0.107171	0.135525	-0.79078	0.429072	0.736396
ENSMAUG00000000797	CYCS	1421071	1421553	101842058	cytochrome c, somatic-like [Source:NCBI gene;Acc:101842058]	protein_coding				101842058	ENSG00000172115	CYCS	54205	189.217	0.249632	0.211286	1.18149	0.237409	0.632774
ENSMAUG00000000798	Scmh1	754251	828433		sex comb on midleg homolog 1 [Source:MGI Symbol;Acc:MGI:1352762]	protein_coding			Scmh1		ENSG00000010803	SCMH1	22955	833.649	-0.200972	0.0968788	-2.07447	0.0380359	0.475823
ENSMAUG00000000799	DPH5	726837	745931		diphthamide biosynthesis 5 [Source:MGI Symbol;Acc:MGI:1916990]	protein_coding					ENSG00000117543	DPH5	51611	189.326	0.026691	0.123599	0.215948	0.829028	0.927221
ENSMAUG00000000800	Alkbh7	6143724	6146061	101826037	alkB homolog 7 [Source:NCBI gene;Acc:101826037]	protein_coding			Alkbh7	101826037	ENSG00000125652	ALKBH7	84266	843.961	-0.202472	0.181602	-1.11492	0.264883	0.65011
ENSMAUG00000000803	Pcdhga10	21937428	21945630		protocadherin gamma subfamily A, 10 [Source:MGI Symbol;Acc:MGI:1935227]	protein_coding			Pcdhga10		ENSG00000253846	PCDHGA10	56106	372.667	0.106188	0.297559	0.356863	0.721194	0.879934
ENSMAUG00000000804	Zbtb6	4722492	4725658	101830009	zinc finger and BTB domain containing 6 [Source:NCBI gene;Acc:101830009]	protein_coding			Zbtb6	101830009	ENSG00000186130	ZBTB6	10773	415.611	0.499501	0.396255	1.26055	0.20747	0.621277
ENSMAUG00000000805	Henmt1	1427	13412	101829687	HEN methyltransferase 1 [Source:NCBI gene;Acc:101829687]	protein_coding			Henmt1	101829687	ENSG00000162639	HENMT1	113802	39.3199	-0.161658	0.338482	-0.477597	0.632937	0.840374
ENSMAUG00000000806	Zbtb41	6646683	6673331	101841077	zinc finger and BTB domain containing 41 [Source:NCBI gene;Acc:101841077]	protein_coding			Zbtb41	101841077	ENSG00000177888	ZBTB41	360023	138.502	0.657031	0.432446	1.51934	0.128678	0.58005
ENSMAUG00000000807	Pgm1	13585627	13640936	101835247	phosphoglucomutase 1 [Source:NCBI gene;Acc:101835247]	protein_coding			Pgm1	101835247	ENSG00000079739	PGM1	5236	3508.78	-0.179635	0.112232	-1.60057	0.109471	0.568991
ENSMAUG00000000808	Cdh16	10644010	10654898	101838683	cadherin 16 [Source:NCBI gene;Acc:101838683]	protein_coding			Cdh16	101838683	ENSG00000166589	CDH16	1014	484.186	-0.221042	0.24417	-0.905282	0.365316	0.700288
ENSMAUG00000000809	Tie1	2792722	2811903	101842830	tyrosine kinase with immunoglobulin like and EGF like domains 1 [Source:NCBI gene;Acc:101842830]	protein_coding			Tie1	101842830	ENSG00000066056	TIE1	7075	10845.4	-0.233579	0.303088	-0.770666	0.440905	0.741355
ENSMAUG00000000810	Fnip2	9160436	9264088	101826630	folliculin interacting protein 2 [Source:NCBI gene;Acc:101826630]	protein_coding			Fnip2	101826630	ENSG00000052795	FNIP2	57600	321.766	0.486372	0.560805	0.867275	0.385791	0.713628
ENSMAUG00000000811	Gpc3	894862	1256116	101844511	glypican 3 [Source:NCBI gene;Acc:101844511]	protein_coding			Gpc3	101844511	ENSG00000147257	GPC3	2719	10271.2	-0.205759	0.178196	-1.15468	0.248223	0.639577
ENSMAUG00000000813	Crybg2	7236781	7263054	101831418	crystallin beta-gamma domain containing 2 [Source:NCBI gene;Acc:101831418]	protein_coding			Crybg2	101831418	ENSG00000176092	CRYBG2	55057	252.855	-0.154388	0.325302	-0.474601	0.635072	0.84152
ENSMAUG00000000814	Insig1	1460021	1468441	101832316	insulin induced gene 1 [Source:NCBI gene;Acc:101832316]	protein_coding			Insig1	101832316	ENSG00000186480	INSIG1	3638	9567.06	-0.0108106	0.140427	-0.0769834	0.938637	0.975784
ENSMAUG00000000816	Rasal2	6083508	6344312	101837864	RAS protein activator like 2 [Source:NCBI gene;Acc:101837864]	protein_coding			Rasal2	101837864	ENSG00000075391	RASAL2	9462	278.281	0.585614	0.562031	1.04196	0.29743	0.666386
ENSMAUG00000000817	Diaph2	4887161	5603554	101822750	diaphanous related formin 2 [Source:NCBI gene;Acc:101822750]	protein_coding			Diaph2	101822750	ENSG00000147202	DIAPH2	1730	313.931	0.104399	0.198732	0.525327	0.599356	0.825047
ENSMAUG00000000818	Haus3	20490652	20500795	101824519	HAUS augmin like complex subunit 3 [Source:NCBI gene;Acc:101824519]	protein_coding			Haus3	101824519	ENSG00000214367	HAUS3	79441	197.965	0.107303	0.165335	0.649004	0.516336	0.782939
ENSMAUG00000000820	Mrpl10	9412881	9420702	101834642	mitochondrial ribosomal protein L10 [Source:NCBI gene;Acc:101834642]	protein_coding			Mrpl10	101834642	ENSG00000159111	MRPL10	124995	1830.14	-0.0835127	0.0846183	-0.986935	0.323675	0.680795
ENSMAUG00000000821	Themis2	5900819	5915393	101823665	thymocyte selection associated family member 2 [Source:NCBI gene;Acc:101823665]	protein_coding			Themis2	101823665	ENSG00000130775	THEMIS2	9473	693.438	0.146075	0.307762	0.474636	0.635047	0.84152
ENSMAUG00000000822	Urgcp	209248	230466	101832768	up-regulator of cell proliferation [Source:NCBI gene;Acc:101832768]	protein_coding			Urgcp	101832768	ENSG00000106608	URGCP	55665	1785.26	-0.114907	0.107126	-1.07264	0.283432	0.659724
ENSMAUG00000000823	Pakap	780232	906962	101824382	A-kinase anchoring protein 2 [Source:NCBI gene;Acc:101824382]	protein_coding				101824382	ENSG00000157654	PALM2AKAP2	445815	18697.4	0.520342	0.224159	2.32131	0.0202704	0.399034
ENSMAUG00000000824	Fbxo5	25447324	25454352	101827555	F-box protein 5 [Source:NCBI gene;Acc:101827555]	protein_coding			Fbxo5	101827555	ENSG00000112029	FBXO5	26271	200.131	-0.0773477	0.14961	-0.516997	0.605158	0.828846
ENSMAUG00000000825	Snrpe	1360	2750		small nuclear ribonucleoprotein E [Source:MGI Symbol;Acc:MGI:98346]	protein_coding			Snrpe		ENSG00000182004	SNRPE	6635	303.001	0.0998041	0.143841	0.69385	0.487776	0.767975
ENSMAUG00000000826	Samsn1	24595160	24649290	101829871	SAM domain-containing protein SAMSN-1 [Source:NCBI gene;Acc:101829871]	protein_coding								321.571	-0.216672	0.352868	-0.614031	0.539195	0.794481
ENSMAUG00000000827	Kcne2	5577449	5591705	101826529	potassium voltage-gated channel subfamily E regulatory subunit 2 [Source:NCBI gene;Acc:101826529]	protein_coding			Kcne2	101826529	ENSG00000159197	KCNE2	9992	813.199	0.0542354	0.200513	0.270484	0.786788	0.908933
ENSMAUG00000000828	Limd1	607036	651648	101836064	LIM domains containing 1 [Source:NCBI gene;Acc:101836064]	protein_coding			Limd1	101836064	ENSG00000144791	LIMD1	8994	3666.94	-0.21175	0.128255	-1.65101	0.0987373	0.561867
ENSMAUG00000000829	Nudt21	206908	223446	101830262	nudix hydrolase 21 [Source:NCBI gene;Acc:101830262]	protein_coding			Nudt21	101830262	ENSG00000167005	NUDT21	11051	2176.07	-0.0942037	0.0947761	-0.993961	0.320242	0.678943
ENSMAUG00000000832	Tac1	3934038	3941875	101833017	tachykinin precursor 1 [Source:NCBI gene;Acc:101833017]	protein_coding			Tac1	101833017	ENSG00000006128	TAC1	6863	2.93154	0.564125	1.64286	0.343381	0.731312	0.884993
ENSMAUG00000000834	CRELD1	7113	8324			protein_coding					ENSG00000163703	CRELD1	78987	625.775	-0.260713	0.104988	-2.48326	0.0130184	0.337517
ENSMAUG00000000835	Asprv1	3255859	3256848	101832793	aspartic peptidase retroviral like 1 [Source:NCBI gene;Acc:101832793]	protein_coding			Asprv1	101832793	ENSG00000244617	ASPRV1	151516	67.5907	0.106828	0.781937	0.13662
ENSMAUG00000000836	Fam98a	11079441	11093052	101834459	family with sequence similarity 98 member A [Source:NCBI gene;Acc:101834459]	protein_coding			Fam98a	101834459	ENSG00000119812	FAM98A	25940	1053.54	0.0523694	0.164661	0.318043	0.750452	0.893345
ENSMAUG00000000839	Gpr180	3250298	3280392	101836308	G protein-coupled receptor 180 [Source:NCBI gene;Acc:101836308]	protein_coding			Gpr180	101836308	ENSG00000152749	GPR180	160897	1613.61	-0.0702792	0.114851	-0.611913	0.540595	0.794774
ENSMAUG00000000840	Vopp1	4192	13630	101825721	VOPP1 WW domain binding protein [Source:NCBI gene;Acc:101825721]	protein_coding			Vopp1	101825721	ENSG00000154978	VOPP1	81552	3710.98	-0.287324	0.144238	-1.99201	0.0463701	0.491286
ENSMAUG00000000842	Ccr5	87189	92139	101833790	C-C chemokine receptor type 5 [Source:NCBI gene;Acc:101833790]	protein_coding			Ccr5	101833790	ENSG00000160791	CCR5	1234	1121.15	0.895068	0.569558	1.57151	0.116063	0.57294
ENSMAUG00000000843	Cdh26	9418016	9455979		cadherin-like 26 [Source:MGI Symbol;Acc:MGI:2685856]	protein_coding			Cdh26		ENSG00000124215	CDH26	60437	83.867	0.562305	0.378049	1.48738	0.136913	0.586497
ENSMAUG00000000844	MLH3	612539	633163			protein_coding					ENSG00000119684	MLH3	27030	173.963	0.220036	0.119801	1.83667	0.0662585	0.525807
ENSMAUG00000000845	Exoc1	1803060	1851083	101842455	exocyst complex component 1 [Source:NCBI gene;Acc:101842455]	protein_coding			Exoc1	101842455	ENSG00000090989	EXOC1	55763	1267.15	0.0987172	0.0626401	1.57594	0.115039	0.57189
ENSMAUG00000000847	Frg1	17172123	17191188	101841151	FSHD region gene 1 [Source:NCBI gene;Acc:101841151]	protein_coding								2050.09	-0.142183	0.13787	-1.03128	0.302408	0.669541
ENSMAUG00000000848	Tspan5	359193	534474	101836137	tetraspanin 5 [Source:NCBI gene;Acc:101836137]	protein_coding			Tspan5	101836137	ENSG00000168785	TSPAN5	10098	382.594	0.215278	0.168633	1.27661	0.201741	0.619155
ENSMAUG00000000849	Tmed7	13353995	13383000	101833320	transmembrane p24 trafficking protein 7 [Source:NCBI gene;Acc:101833320]	protein_coding								4144.43	0.237109	0.127479	1.85999	0.0628875	0.524883
ENSMAUG00000000850	Traf3ip3	1934219	1954883		TRAF3 interacting protein 3 [Source:MGI Symbol;Acc:MGI:2441706]	protein_coding			Traf3ip3		ENSG00000009790	TRAF3IP3	80342	1379.9	-0.0830062	0.212629	-0.39038	0.696255	0.869277
ENSMAUG00000000851	Kif2a	6553447	6611049	101827014	kinesin family member 2A [Source:NCBI gene;Acc:101827014]	protein_coding			Kif2a	101827014	ENSG00000068796	KIF2A	3796	1334.16	0.136562	0.156606	0.872009	0.383203	0.712182
ENSMAUG00000000852	S100pbp	3045	6468		S100P binding protein [Source:MGI Symbol;Acc:MGI:1921898]	protein_coding			S100pbp		ENSG00000116497	S100PBP	64766	113.446	0.873831	0.501344	1.74298	0.0813376	0.540667
ENSMAUG00000000853	Mtmr9	4855759	4882308	101841625	myotubularin related protein 9 [Source:NCBI gene;Acc:101841625]	protein_coding			Mtmr9	101841625	ENSG00000104643	MTMR9	66036	2205.37	0.181483	0.133037	1.36415	0.172519	0.610772
ENSMAUG00000000854	Lrat	12596192	12603679	101832465	lecithin retinol acyltransferase [Source:NCBI gene;Acc:101832465]	protein_coding			Lrat	101832465	ENSG00000121207	LRAT	9227	714.997	0.19981	0.392153	0.509522	0.610387	0.831138
ENSMAUG00000000855	Pbx4	1195813	1235750	101838980	PBX homeobox 4 [Source:NCBI gene;Acc:101838980]	protein_coding			Pbx4	101838980	ENSG00000105717	PBX4	80714	153.156	0.0426184	0.308705	0.138055	0.890197	0.956662
ENSMAUG00000000856	Dlg3	6490761	6545416	101843428	discs large MAGUK scaffold protein 3 [Source:NCBI gene;Acc:101843428]	protein_coding			Dlg3	101843428	ENSG00000082458	DLG3	1741	1004.49	0.00922038	0.122744	0.0751191	0.94012	0.976636
ENSMAUG00000000857	Helz2	12364618	12379305	101840927	helicase with zinc finger 2 [Source:NCBI gene;Acc:101840927]	protein_coding			Helz2	101840927	ENSG00000130589	HELZ2	85441	6073.62	1.14763	0.230065	4.98831	6.09108e-07	0.000208371
ENSMAUG00000000859	Dusp6	7238	12150	101840166	dual specificity phosphatase 6 [Source:NCBI gene;Acc:101840166]	protein_coding			Dusp6	101840166	ENSG00000139318	DUSP6	1848	6071.14	0.158642	0.20856	0.760651	0.446866	0.743092
ENSMAUG00000000860	Dsn1	653308	663665	101836324	DSN1 component of MIS12 kinetochore complex [Source:NCBI gene;Acc:101836324]	protein_coding			Dsn1	101836324	ENSG00000149636	DSN1	79980	89.1087	-0.0553884	0.224372	-0.246859	0.805017	0.917397
ENSMAUG00000000861	H2-DMa	1055470	1060013	101844787	class II histocompatibility antigen, M alpha chain [Source:NCBI gene;Acc:101844787]	protein_coding			H2-DMa	101844787	ENSG00000204257	HLA-DMA	3108	3834.91	-0.311096	0.252052	-1.23425	0.217108	0.621679
ENSMAUG00000000862	Ghr	139794	164564		growth hormone receptor [Source:MGI Symbol;Acc:MGI:95708]	protein_coding			Ghr		ENSG00000112964	GHR	2690	619.173	0.806584	0.327689	2.46143	0.0138386	0.343159
ENSMAUG00000000863	Tnip2	20148886	20165868	101822559	TNFAIP3 interacting protein 2 [Source:NCBI gene;Acc:101822559]	protein_coding			Tnip2	101822559	ENSG00000168884	TNIP2	79155	381.394	-0.0080115	0.116792	-0.0685964	0.945311	0.97889
ENSMAUG00000000864	Dlst	739907	763204	101833467	dihydrolipoamide S-succinyltransferase [Source:NCBI gene;Acc:101833467]	protein_coding			Dlst	101833467	ENSG00000119689	DLST	1743	6257.65	-0.127525	0.0606282	-2.10339	0.0354317	0.469944
ENSMAUG00000000865	Grik1	9316635	9689407	101836714	glutamate ionotropic receptor kainate type subunit 1 [Source:NCBI gene;Acc:101836714]	protein_coding			Grik1	101836714	ENSG00000171189	GRIK1	2897	41.2809	-0.363744	0.409886	-0.887427	0.374849	0.707295
ENSMAUG00000000868	CEACAM21	999857	1015020			protein_coding					ENSG00000007129	CEACAM21	90273	222.147	0.110764	0.267919	0.413425	0.679295	0.861526
ENSMAUG00000000869	Gphn	5233636	5614974		gephyrin [Source:MGI Symbol;Acc:MGI:109602]	protein_coding			Gphn		ENSG00000171723	GPHN	10243	947.438	0.0129851	0.109253	0.118853	0.905391	0.962865
ENSMAUG00000000870	Mybphl	8950281	8962963	101834737	myosin binding protein H like [Source:NCBI gene;Acc:101834737]	protein_coding			Mybphl	101834737	ENSG00000221986	MYBPHL	343263	246.941	-0.252299	0.407557	-0.619053	0.535882	0.792562
ENSMAUG00000000871	SLC25A23	6094713	6100557			protein_coding					ENSG00000125648	SLC25A23	79085	525.772	0.0968036	0.176381	0.548834	0.58312	0.817489
ENSMAUG00000000872	Hsf4	541727	546606	101822762	heat shock transcription factor 4 [Source:NCBI gene;Acc:101822762]	protein_coding			Hsf4	101822762	ENSG00000102878	HSF4	3299	174.932	0.363812	0.333261	1.09167	0.274976	0.655895
ENSMAUG00000000874	Clcnkb	5520749	5531546	101831787	chloride channel protein ClC-Kb [Source:NCBI gene;Acc:101831787]	protein_coding								61.8439	0.0923208	0.309919	0.297887	0.765789	0.89969
ENSMAUG00000000875	Nqo2	19106632	19120482	101835294	N-ribosyldihydronicotinamide:quinone reductase 2 [Source:NCBI gene;Acc:101835294]	protein_coding			Nqo2	101835294	ENSG00000124588	NQO2	4835	591.852	0.154854	0.168044	0.921509	0.356785	0.696876
ENSMAUG00000000876	Adgrf5	7443938	7473614		adhesion G protein-coupled receptor F5 [Source:MGI Symbol;Acc:MGI:2182928]	protein_coding			Adgrf5		ENSG00000069122	ADGRF5	221395	12273	0.0288335	0.334482	0.0862033	0.931305	0.972667
ENSMAUG00000000877	Bdh1	8928487	8951317		3-hydroxybutyrate dehydrogenase, type 1 [Source:MGI Symbol;Acc:MGI:1919161]	protein_coding			Bdh1		ENSG00000161267	BDH1	622	1037.85	-0.0620971	0.105358	-0.58939	0.555599	0.803309
ENSMAUG00000000879	Ylpm1	801926	878449	101840607	YLP motif containing 1 [Source:NCBI gene;Acc:101840607]	protein_coding			Ylpm1	101840607	ENSG00000119596	YLPM1	56252	1607.69	0.0151631	0.133098	0.113924	0.909298	0.964645
ENSMAUG00000000880	Rflna	4099121	4107149	101834571	refilin A [Source:NCBI gene;Acc:101834571]	protein_coding								221.616	-0.206937	0.339748	-0.609089	0.542465	0.795659
ENSMAUG00000000881	Tmem245	11620587	11701833	101825072	transmembrane protein 245 [Source:NCBI gene;Acc:101825072]	protein_coding			Tmem245	101825072	ENSG00000106771	TMEM245	23731	2078.51	0.306925	0.130961	2.34363	0.0190969	0.388004
ENSMAUG00000000882	Nexmif	961402	995746	101836583	neurite extension and migration factor [Source:NCBI gene;Acc:101836583]	protein_coding			Nexmif	101836583	ENSG00000050030	NEXMIF	340533	22.9754	1.05086	0.6452	1.62873	0.10337	0.564955
ENSMAUG00000000883	KPTN	1585874	1587072			protein_coding					ENSG00000118162	KPTN	11133	165.378	-0.166047	0.156074	-1.0639	0.287375	0.660562
ENSMAUG00000000884	Emc10	627	3503	101840626	ER membrane protein complex subunit 10 [Source:NCBI gene;Acc:101840626]	protein_coding			Emc10	101840626	ENSG00000161671	EMC10	284361	4036.23	-0.194655	0.138511	-1.40534	0.15992	0.602563
ENSMAUG00000000885	Ppp1r21	10013946	10075198	101833688	protein phosphatase 1 regulatory subunit 21 [Source:NCBI gene;Acc:101833688]	protein_coding			Ppp1r21	101833688	ENSG00000162869	PPP1R21	129285	2314.97	-0.0573796	0.0577189	-0.994122	0.320164	0.678943
ENSMAUG00000000886	Pkia	16662847	16668939	101837925	cAMP-dependent protein kinase inhibitor alpha [Source:NCBI gene;Acc:101837925]	protein_coding			Pkia	101837925	ENSG00000171033	PKIA	5569	2017.97	0.411293	0.167169	2.46035	0.0138803	0.343159
ENSMAUG00000000887	Atg16l1	4839197	4879762		autophagy related 16-like 1 (S. cerevisiae) [Source:MGI Symbol;Acc:MGI:1924290]	protein_coding			Atg16l1		ENSG00000085978	ATG16L1	55054	956.009	-0.178465	0.0569899	-3.13151	0.0017391	0.141338
ENSMAUG00000000888	Ccdc120	2596837	2603112	101831984	coiled-coil domain containing 120 [Source:NCBI gene;Acc:101831984]	protein_coding			Ccdc120	101831984	ENSG00000147144	CCDC120	90060	1743.36	0.397886	0.191642	2.0762	0.0378758	0.475823
ENSMAUG00000000889	Rab7b	113494	126925		RAB7B, member RAS oncogene family [Source:MGI Symbol;Acc:MGI:2442295]	protein_coding			Rab7b		ENSG00000276600	RAB7B	338382	454.333	0.367417	0.318837	1.15237	0.24917	0.639577
ENSMAUG00000000890	Pgf	697124	706867	101833210	placental growth factor [Source:NCBI gene;Acc:101833210]	protein_coding			Pgf	101833210	ENSG00000119630	PGF	5228	59.8157	0.267705	0.322291	0.830633	0.406181	0.722685
ENSMAUG00000000893	Tmem160	1266628	1268572	101825973	transmembrane protein 160 [Source:NCBI gene;Acc:101825973]	protein_coding			Tmem160	101825973	ENSG00000130748	TMEM160	54958	2088.46	-0.219007	0.199178	-1.09955	0.271528	0.653675
ENSMAUG00000000894	Prss54	1374311	1388944	101833435	serine protease 54 [Source:NCBI gene;Acc:101833435]	protein_coding			Prss54	101833435	ENSG00000103023	PRSS54	221191	202.822	0.0196339	0.349569	0.0561659	0.95521	0.982734
ENSMAUG00000000895	AW551984	2088299	2109192	101823366	von Willebrand factor A domain-containing protein 5A [Source:NCBI gene;Acc:101823366]	protein_coding			AW551984	101823366	ENSG00000110002	VWA5A	4013	228.255	0.712185	0.201743	3.53015	0.000415317	0.0545475
ENSMAUG00000000896	Bmp1	18560885	18604118	101840264	bone morphogenetic protein 1 [Source:NCBI gene;Acc:101840264]	protein_coding			Bmp1	101840264	ENSG00000168487	BMP1	649	3191.23	-0.0337331	0.156075	-0.216134	0.828883	0.927217
ENSMAUG00000000897	Thap12	9322131	9337808	101827056	THAP domain containing 12 [Source:NCBI gene;Acc:101827056]	protein_coding								3306.74	0.12687	0.129851	0.977046	0.328547	0.683762
ENSMAUG00000000898	Traf2	1797050	1818858	101823322	TNF receptor associated factor 2 [Source:NCBI gene;Acc:101823322]	protein_coding			Traf2	101823322	ENSG00000127191	TRAF2	7186	1671.22	-0.335566	0.157108	-2.13589	0.0326883	0.464518
ENSMAUG00000000899	RPS29	15063538	15064564		ribosomal protein S29 [Source:MGI Symbol;Acc:MGI:107681]	protein_coding					ENSG00000213741	RPS29	6235	2776.95	-0.283262	0.241606	-1.17241	0.241031	0.633998
ENSMAUG00000000900	Tmem135	259791	450385	101838973	transmembrane protein 135 [Source:NCBI gene;Acc:101838973]	protein_coding			Tmem135	101838973	ENSG00000166575	TMEM135	65084	719.918	0.245807	0.0984248	2.49741	0.0125105	0.337517
ENSMAUG00000000901	MBP	31805124	31837781	101822529	myelin basic protein [Source:NCBI gene;Acc:101822529]	protein_coding				101822529	ENSG00000197971	MBP	4155	408.575	-0.248421	0.480269	-0.517253	0.604979	0.828846
ENSMAUG00000000902	Thada	5726186	6010092		thyroid adenoma associated [Source:MGI Symbol;Acc:MGI:3039623]	protein_coding			Thada		ENSG00000115970	THADA	63892	558.527	0.272557	0.164366	1.65823	0.0972706	0.560662
ENSMAUG00000000903	Gnai1	5587381	5666787	101828746	G protein subunit alpha i1 [Source:NCBI gene;Acc:101828746]	protein_coding			Gnai1	101828746	ENSG00000127955	GNAI1	2770	2616.55	-0.0753618	0.164788	-0.457327	0.647436	0.847077
ENSMAUG00000000904	Rmnd5a	11777560	11816727		required for meiotic nuclear division 5 homolog A [Source:MGI Symbol;Acc:MGI:1915727]	protein_coding			Rmnd5a		ENSG00000153561	RMND5A	64795	514.825	0.486412	0.3603	1.35002	0.17701	0.611361
ENSMAUG00000000905	Inip	2870754	2889727	101823062	INTS3 and NABP interacting protein [Source:NCBI gene;Acc:101823062]	protein_coding			Inip	101823062	ENSG00000148153	INIP	58493	1055.29	-0.0317344	0.0867096	-0.365984	0.714377	0.877223
ENSMAUG00000000906	Prss57	2394668	2399210	101843632	serine protease 57 [Source:NCBI gene;Acc:101843632]	protein_coding			Prss57	101843632	ENSG00000185198	PRSS57	400668	5.17794	-0.510124	0.81675	-0.624578	0.532248	0.789728
ENSMAUG00000000907	Tmem127	6981652	6995404	101832010	transmembrane protein 127 [Source:NCBI gene;Acc:101832010]	protein_coding			Tmem127	101832010	ENSG00000135956	TMEM127	55654	5170.41	0.0169522	0.0442188	0.383372	0.701444	0.871914
ENSMAUG00000000908	Slc8b1	8919518	8939886	101840746	solute carrier family 8 member B1 [Source:NCBI gene;Acc:101840746]	protein_coding			Slc8b1	101840746	ENSG00000089060	SLC8B1	80024	2584.99	-0.0218501	0.158172	-0.138141	0.890129	0.956662
ENSMAUG00000000909	Ankhd1	22887160	22983341	101832879	ankyrin repeat and KH domain-containing protein 1 [Source:NCBI gene;Acc:101832879]	protein_coding								3553.55	0.0258459	0.109603	0.235815	0.813576	0.921443
ENSMAUG00000000910	POLE	1980387	1986601			protein_coding					ENSG00000177084	POLE	5426	44.1435	-0.860359	0.393994	-2.18369	0.0289853	0.448373
ENSMAUG00000000911	Wdr46	89304	97600	101835719	WD repeat domain 46 [Source:NCBI gene;Acc:101835719]	protein_coding			Wdr46	101835719	ENSG00000227057	WDR46	9277	2066.63	-0.223458	0.145599	-1.53475	0.124845	0.577628
ENSMAUG00000000913	E2f1	3105848	3114630		E2F transcription factor 1 [Source:MGI Symbol;Acc:MGI:101941]	protein_coding			E2f1		ENSG00000101412	E2F1	1869	922.11	-0.161527	0.143391	-1.12648	0.259963	0.645784
ENSMAUG00000000914	Pdcd1	10349132	10363481	101831062	programmed cell death 1 [Source:NCBI gene;Acc:101831062]	protein_coding			Pdcd1	101831062	ENSG00000188389	PDCD1	5133	38.4355	-0.214944	0.483541	-0.44452	0.656667	0.850464
ENSMAUG00000000916	Bcl2l14	1966261	1991725	101842156	BCL2 like 14 [Source:NCBI gene;Acc:101842156]	protein_coding			Bcl2l14	101842156	ENSG00000121380	BCL2L14	79370	173.224	-0.246038	0.261808	-0.939765	0.347338	0.692444
ENSMAUG00000000917	Ralgapa2	17312119	17576589		Ral GTPase activating protein, alpha subunit 2 (catalytic) [Source:MGI Symbol;Acc:MGI:3036245]	protein_coding			Ralgapa2		ENSG00000188559	RALGAPA2	57186	219.829	0.774301	0.525143	1.47446	0.140359	0.588021
ENSMAUG00000000918	Acadm	4094981	4116925	101842383	acyl-CoA dehydrogenase medium chain [Source:NCBI gene;Acc:101842383]	protein_coding			Acadm	101842383	ENSG00000117054	ACADM	34	4518.38	0.00712176	0.164193	0.0433743	0.965403	0.986392
ENSMAUG00000000919	Evc	17296971	17332785	101836274	EvC ciliary complex subunit 1 [Source:NCBI gene;Acc:101836274]	protein_coding			Evc	101836274	ENSG00000072840	EVC	2121	268.18	0.471922	0.336574	1.40213	0.160875	0.603014
ENSMAUG00000000920	Omg	7867010	7877208	101844577	oligodendrocyte myelin glycoprotein [Source:NCBI gene;Acc:101844577]	protein_coding								4.26076	-0.67698	1.02757	-0.658817	0.510013	0.779621
ENSMAUG00000000921	Fzr1	836116	848197	101841393	fizzy and cell division cycle 20 related 1 [Source:NCBI gene;Acc:101841393]	protein_coding			Fzr1	101841393	ENSG00000105325	FZR1	51343	3102.79	-0.272076	0.12862	-2.11535	0.0344001	0.468746
ENSMAUG00000000923	Hopx	1317529	1324807	101840480	HOP homeobox [Source:NCBI gene;Acc:101840480]	protein_coding			Hopx	101840480	ENSG00000171476	HOPX	84525	42376.2	0.0587433	0.130115	0.451471	0.65165	0.848687
ENSMAUG00000000924	Elavl1	841255	881200	101839345	ELAV like RNA binding protein 1 [Source:NCBI gene;Acc:101839345]	protein_coding			Elavl1	101839345	ENSG00000066044	ELAVL1	1994	2959.86	-0.139175	0.0611912	-2.27443	0.0229402	0.414559
ENSMAUG00000000926	RB1CC1	970484	1040299	101843373	RB1 inducible coiled-coil 1 [Source:NCBI gene;Acc:101843373]	protein_coding				101843373	ENSG00000023287	RB1CC1	9821	1855.14	0.130219	0.17029	0.764693	0.444455	0.742122
ENSMAUG00000000927	Tpk1	2961119	3148760	101837734	thiamin pyrophosphokinase 1 [Source:NCBI gene;Acc:101837734]	protein_coding			Tpk1	101837734	ENSG00000196511	TPK1	27010	126.858	0.0158587	0.184804	0.0858136	0.931615	0.972667
ENSMAUG00000000928	Pafah1b1	2559561	2582526		platelet-activating factor acetylhydrolase, isoform 1b, subunit 1 [Source:MGI Symbol;Acc:MGI:109520]	protein_coding			Pafah1b1		ENSG00000007168	PAFAH1B1	5048	2762.35	0.075545	0.0727686	1.03815	0.299198	0.667254
ENSMAUG00000000929	Havcr2	5446513	5465332	101837328	hepatitis A virus cellular receptor 2 homolog [Source:NCBI gene;Acc:101837328]	protein_coding			Havcr2	101837328	ENSG00000135077	HAVCR2	84868	348.594	0.382003	0.250656	1.52401	0.127505	0.579549
ENSMAUG00000000930	Myo5b	447763	716237	101828471	myosin VB [Source:NCBI gene;Acc:101828471]	protein_coding			Myo5b	101828471	ENSG00000167306	MYO5B	4645	4643.41	0.584937	0.481282	1.21537	0.224224	0.625988
ENSMAUG00000000931	Ctnna2	4557608	5629446	101828296	catenin alpha 2 [Source:NCBI gene;Acc:101828296]	protein_coding			Ctnna2	101828296	ENSG00000066032	CTNNA2	1496	13.8253	-0.0315178	0.922947	-0.0341491	0.972758	0.98952
ENSMAUG00000000932	Sertad4	2255696	2261707	101837191	SERTA domain containing 4 [Source:NCBI gene;Acc:101837191]	protein_coding			Sertad4	101837191	ENSG00000082497	SERTAD4	56256	109.374	0.517308	0.292318	1.76967	0.0767815	0.537298
ENSMAUG00000000935	Ehbp1	8890179	9170704	101831660	EH domain binding protein 1 [Source:NCBI gene;Acc:101831660]	protein_coding			Ehbp1	101831660	ENSG00000115504	EHBP1	23301	1714.78	0.201238	0.126252	1.59394	0.110949	0.568991
ENSMAUG00000000937	Stk33	10092022	10169486	101842527	serine/threonine kinase 33 [Source:NCBI gene;Acc:101842527]	protein_coding			Stk33	101842527	ENSG00000130413	STK33	65975	106.933	0.472512	0.295367	1.59975	0.109655	0.568991
ENSMAUG00000000938	Wbp11	4313477	4326804	101826449	WW domain binding protein 11 [Source:NCBI gene;Acc:101826449]	protein_coding								5462.59	-0.0534783	0.0480378	-1.11325	0.2656	0.65011
ENSMAUG00000000941	A830018L16Rik	7265829	7445582		RIKEN cDNA A830018L16 gene [Source:MGI Symbol;Acc:MGI:2444149]	protein_coding			A830018L16Rik		ENSG00000165084	C8orf34	116328	33.0352	0.641847	0.462234	1.38857	0.164962	0.606338
ENSMAUG00000000943	Arhgef9	583261	722638	101835187	Cdc42 guanine nucleotide exchange factor 9 [Source:NCBI gene;Acc:101835187]	protein_coding			Arhgef9	101835187	ENSG00000131089	ARHGEF9	23229	37.9201	0.115726	0.248627	0.465461	0.641602	0.844413
ENSMAUG00000000944	Fgb	12763581	12771129	101833425	fibrinogen beta chain [Source:NCBI gene;Acc:101833425]	protein_coding			Fgb	101833425	ENSG00000171564	FGB	2244	7.09759	0.90167	0.691752	1.30346	0.192418	0.615704
ENSMAUG00000000946	Sytl4	1652181	1700096	101843400	synaptotagmin like 4 [Source:NCBI gene;Acc:101843400]	protein_coding			Sytl4	101843400	ENSG00000102362	SYTL4	94121	443.333	0.218747	0.231269	0.945856	0.344222	0.691358
ENSMAUG00000000947	Gpc4	1360703	1474426	101822525	glypican 4 [Source:NCBI gene;Acc:101822525]	protein_coding			Gpc4	101822525	ENSG00000076716	GPC4	2239	959.25	0.160347	0.224998	0.712658	0.476057	0.760018
ENSMAUG00000000949	Zfp710	5481926	5551099	101826025	zinc finger protein 710 [Source:NCBI gene;Acc:101826025]	protein_coding								3319.63	-0.0695812	0.105056	-0.662326	0.507763	0.778878
ENSMAUG00000000950	Kif26b	4100826	4488666	101837616	kinesin family member 26B [Source:NCBI gene;Acc:101837616]	protein_coding			Kif26b	101837616	ENSG00000162849	KIF26B	55083	241.765	-0.415779	0.327733	-1.26865	0.204565	0.620449
ENSMAUG00000000951	T	900738	908753	101835878	T-box transcription factor T [Source:NCBI gene;Acc:101835878]	protein_coding			T	101835878	ENSG00000164458	TBXT	6862	852.581	0.184972	0.406915	0.454573	0.649417	0.848083
ENSMAUG00000000952	Carmil1	27768723	28040170	101822447	capping protein regulator and myosin 1 linker 1 [Source:NCBI gene;Acc:101822447]	protein_coding			Carmil1	101822447	ENSG00000079691	CARMIL1	55604	2433	0.168876	0.235509	0.717068	0.473332	0.758632
ENSMAUG00000000954	Dda1	64446	70135	101838298	DET1 and DDB1 associated 1 [Source:NCBI gene;Acc:101838298]	protein_coding			Dda1	101838298	ENSG00000130311	DDA1	79016	4777.83	-0.260915	0.134699	-1.93703	0.0527417	0.50972
ENSMAUG00000000955	Rnmt	5572940	5594414	101824442	RNA guanine-7 methyltransferase [Source:NCBI gene;Acc:101824442]	protein_coding			Rnmt	101824442	ENSG00000101654	RNMT	8731	359.634	0.274146	0.202743	1.35219	0.176315	0.611361
ENSMAUG00000000956	Dut	4909089	4919133	101827041	deoxyuridine triphosphatase [Source:NCBI gene;Acc:101827041]	protein_coding			Dut	101827041	ENSG00000128951	DUT	1854	1269.1	0.01048	0.174763	0.0599673	0.952182	0.981129
ENSMAUG00000000958	Crtc2	5983	12707	101836788	CREB regulated transcription coactivator 2 [Source:NCBI gene;Acc:101836788]	protein_coding			Crtc2	101836788	ENSG00000160741	CRTC2	200186	4095.93	-0.184261	0.116385	-1.5832	0.113377	0.569642
ENSMAUG00000000960	Taf4b	20558132	20674795		TATA-box binding protein associated factor 4b [Source:MGI Symbol;Acc:MGI:2152345]	protein_coding			Taf4b		ENSG00000141384	TAF4B	6875	56.6768	0.834722	0.466839	1.78803	0.0737713	0.534958
ENSMAUG00000000961	ITGB1	3004508	3052795			protein_coding					ENSG00000150093	ITGB1	3688	33793.2	-0.022819	0.119092	-0.191608	0.848049	0.936828
ENSMAUG00000000962	Sema3g	932979	945969	101823065	semaphorin 3G [Source:NCBI gene;Acc:101823065]	protein_coding			Sema3g	101823065	ENSG00000010319	SEMA3G	56920	23164.3	-0.119095	0.318539	-0.373879	0.708494	0.874995
ENSMAUG00000000965	Cstf2	1532443	1561085	101842789	cleavage stimulation factor subunit 2 [Source:NCBI gene;Acc:101842789]	protein_coding			Cstf2	101842789	ENSG00000101811	CSTF2	1478	516.831	0.0666823	0.124621	0.535079	0.592595	0.821729
ENSMAUG00000000968	NAPG	10660647	10666015	101829435	NSF attachment protein gamma [Source:NCBI gene;Acc:101829435]	protein_coding				101829435	ENSG00000134265	NAPG	8774	183.31	0.599131	0.434454	1.37904	0.167882	0.607567
ENSMAUG00000000969	Rac3	1087467	1090136	101835840	Rac family small GTPase 3 [Source:NCBI gene;Acc:101835840]	protein_coding			Rac3	101835840	ENSG00000169750	RAC3	5881	728.771	-0.0762352	0.2969	-0.25677	0.797356	0.912256
ENSMAUG00000000972	SECTM1	744509	754663	101836439	secreted and transmembrane protein 1A-like [Source:NCBI gene;Acc:101836439]	protein_coding			Sectm1a	101836439	ENSG00000141574	SECTM1	6398	591.735	0.347631	0.287539	1.20898	0.226669	0.626104
ENSMAUG00000000973	Ush1c	512969	556344	101834591	USH1 protein network component harmonin [Source:NCBI gene;Acc:101834591]	protein_coding			Ush1c	101834591	ENSG00000006611	USH1C	10083	423.635	0.322476	0.339096	0.950986	0.341612	0.689694
ENSMAUG00000000975	Tmem167	23245325	23266458	101832329	transmembrane protein 167A [Source:NCBI gene;Acc:101832329]	protein_coding			Tmem167	101832329	ENSG00000174695	TMEM167A	153339	2495.71	0.164342	0.154743	1.06203	0.28822	0.660562
ENSMAUG00000000976	Zfr	9239310	9297185	101841908	zinc finger RNA binding protein [Source:NCBI gene;Acc:101841908]	protein_coding			Zfr	101841908	ENSG00000056097	ZFR	51663	1451.19	0.430167	0.326845	1.31612	0.188134	0.614558
ENSMAUG00000000977	Alb	7290925	7319895	101837229	albumin [Source:NCBI gene;Acc:101837229]	protein_coding			Alb	101837229	ENSG00000163631	ALB	213	28.9377	2.24021	0.773585	2.89588	0.00378093	0.207112
ENSMAUG00000000978	Lrrc8b	7201981	7234903	101844931	leucine rich repeat containing 8 VRAC subunit B [Source:NCBI gene;Acc:101844931]	protein_coding			Lrrc8b	101844931	ENSG00000197147	LRRC8B	23507	1293.79	0.136016	0.18018	0.754887	0.450317	0.745428
ENSMAUG00000000979	Grhl3	8761736	8779395		grainyhead like transcription factor 3 [Source:MGI Symbol;Acc:MGI:2655333]	protein_coding			Grhl3		ENSG00000158055	GRHL3	57822	9.10159	0.188761	0.73989	0.255121	0.79863	0.912877
ENSMAUG00000000980	Cdk5rap1	3306011	3324634	101832235	CDK5 regulatory subunit associated protein 1 [Source:NCBI gene;Acc:101832235]	protein_coding			Cdk5rap1	101832235	ENSG00000101391	CDK5RAP1	51654	442.31	0.155636	0.0959109	1.62271	0.104652	0.565134
ENSMAUG00000000981	Pycr1	1171670	1175404	101837782	pyrroline-5-carboxylate reductase 1 [Source:NCBI gene;Acc:101837782]	protein_coding			Pycr1	101837782	ENSG00000183010	PYCR1	5831	207.909	0.0907137	0.187765	0.483124	0.629008	0.838651
ENSMAUG00000000982	Tspan33	10546748	10551101	101826286	tetraspanin 33 [Source:NCBI gene;Acc:101826286]	protein_coding			Tspan33	101826286	ENSG00000158457	TSPAN33	340348	135.523	-0.170668	0.271712	-0.628123	0.529923	0.788718
ENSMAUG00000000984	Mbnl3	2250285	2303910	101823241	muscleblind like splicing regulator 3 [Source:NCBI gene;Acc:101823241]	protein_coding			Mbnl3	101823241	ENSG00000076770	MBNL3	55796	214.512	0.340251	0.162953	2.08804	0.0367946	0.474619
ENSMAUG00000000985	Tmem60	3117064	3121100	101827785	transmembrane protein 60 [Source:NCBI gene;Acc:101827785]	protein_coding			Tmem60	101827785	ENSG00000135211	TMEM60	85025	803.421	-0.153999	0.128972	-1.19405	0.232457	0.629497
ENSMAUG00000000986	Nelfcd	8323327	8332328	101836210	negative elongation factor complex member C/D [Source:NCBI gene;Acc:101836210]	protein_coding			Nelfcd	101836210	ENSG00000101158	NELFCD	51497	2688.44	-0.148154	0.131103	-1.13006	0.258451	0.645142
ENSMAUG00000000987	PKM	12174889	12176292			protein_coding					ENSG00000067225	PKM	5315	6.81263	-0.468748	0.527868	-0.888002	0.374539	0.707139
ENSMAUG00000000988	C12orf73	170121	174268	101844096	chromosome unknown C12orf73 homolog [Source:NCBI gene;Acc:101844096]	protein_coding				101844096	ENSG00000204954	C12orf73	728568	419.424	0.0635457	0.118783	0.534973	0.592668	0.821729
ENSMAUG00000000989	Cage1	15124966	15158754	101840332	cancer antigen 1 [Source:NCBI gene;Acc:101840332]	protein_coding			Cage1	101840332	ENSG00000164304	CAGE1	285782	52.0748	0.0872283	0.261608	0.333431	0.738809	0.888232
ENSMAUG00000000990	9430015G10Rik	168947	182472	101831682	chromosome unknown C1orf159 homolog [Source:NCBI gene;Acc:101831682]	protein_coding			9430015G10Rik	101831682	ENSG00000131591	C1orf159	54991	695.327	0.0953595	0.10869	0.877352	0.380296	0.710898
ENSMAUG00000000991	Dpagt1	6839536	6846023	101829065	dolichyl-phosphate N-acetylglucosaminephosphotransferase 1 [Source:NCBI gene;Acc:101829065]	protein_coding			Dpagt1	101829065	ENSG00000172269	DPAGT1	1798	2226.61	-0.0649717	0.0837518	-0.775764	0.437888	0.740802
ENSMAUG00000000992	Cdkn1a	2286177	2293513	101826412	cyclin dependent kinase inhibitor 1A [Source:NCBI gene;Acc:101826412]	protein_coding			Cdkn1a	101826412	ENSG00000124762	CDKN1A	1026	10512.4	0.134452	0.156625	0.858431	0.390655	0.71483
ENSMAUG00000000993	Cggbp1	12270733	12275749	101826809	CGG triplet repeat binding protein 1 [Source:NCBI gene;Acc:101826809]	protein_coding			Cggbp1	101826809	ENSG00000163320	CGGBP1	8545	953.244	0.498742	0.382885	1.30259	0.192715	0.615704
ENSMAUG00000000995	NOVA1	5700785	5771650			protein_coding					ENSG00000139910	NOVA1	4857	55.166	-0.632968	0.313728	-2.01757	0.0436359	0.480479
ENSMAUG00000000996	RNF146	6555585	6557036			protein_coding					ENSG00000118518	RNF146	81847	115.214	0.0314737	0.158586	0.198464	0.842682	0.935258
ENSMAUG00000000997	Ubl5	9552056	9553424	101836731	ubiquitin like 5 [Source:NCBI gene;Acc:101836731]	protein_coding			Ubl5	101836731	ENSG00000198258	UBL5	59286	6778.35	-0.172208	0.17065	-1.00913	0.312913	0.676307
ENSMAUG00000000998	Washc1	277867	290317	101825155	WASH complex subunit 1 [Source:NCBI gene;Acc:101825155]	protein_coding								3093.44	-0.131476	0.142952	-0.91972	0.357719	0.696977
ENSMAUG00000000999	Fosb	579070	584781	101835382	FosB proto-oncogene, AP-1 transcription factor subunit [Source:NCBI gene;Acc:101835382]	protein_coding			Fosb	101835382	ENSG00000125740	FOSB	2354	206.447	0.759909	0.541278	1.40392	0.160344	0.602563
ENSMAUG00000001000	Chd7	4092555	4215485		chromodomain helicase DNA binding protein 7 [Source:MGI Symbol;Acc:MGI:2444748]	protein_coding			Chd7		ENSG00000171316	CHD7	55636	1258.04	0.0988782	0.138659	0.713105	0.47578	0.759931
ENSMAUG00000001001	Polr2i	6070239	6071522	101842642	RNA polymerase II subunit I [Source:NCBI gene;Acc:101842642]	protein_coding			Polr2i	101842642	ENSG00000105258	POLR2I	5438	2386.6	-0.225098	0.161568	-1.39321	0.163556	0.605686
ENSMAUG00000001002	Sema3a	521610	724641	101841839	semaphorin 3A [Source:NCBI gene;Acc:101841839]	protein_coding			Sema3a	101841839	ENSG00000075213	SEMA3A	10371	5554.92	0.452451	0.258332	1.75143	0.0798721	0.539252
ENSMAUG00000001003	KIAA2012	18921936	19035011		predicted gene 973 [Source:MGI Symbol;Acc:MGI:2685819]	protein_coding			Gm973		ENSG00000182329	KIAA2012	100652824	100.327	0.408918	0.326785	1.25134	0.210812	0.621679
ENSMAUG00000001004	Prkaa1	1727718	1759983		protein kinase, AMP-activated, alpha 1 catalytic subunit [Source:MGI Symbol;Acc:MGI:2145955]	protein_coding			Prkaa1		ENSG00000132356	PRKAA1	5562	326.581	0.523232	0.235348	2.22323	0.0262002	0.434122
ENSMAUG00000001005	Tnfsf11	10858561	10890315	101827402	TNF superfamily member 11 [Source:NCBI gene;Acc:101827402]	protein_coding			Tnfsf11	101827402	ENSG00000120659	TNFSF11	8600	10.8005	0.79968	0.520731	1.53569	0.124615	0.577628
ENSMAUG00000001006	Ager	588053	590979	101842404	advanced glycosylation end-product specific receptor [Source:NCBI gene;Acc:101842404]	protein_coding			Ager	101842404	ENSG00000204305	AGER	177	177722	-0.165331	0.240297	-0.688029	0.491435	0.770929
ENSMAUG00000001007	Ccser1	2549086	3492471	101830877	coiled-coil serine rich protein 1 [Source:NCBI gene;Acc:101830877]	protein_coding			Ccser1	101830877	ENSG00000184305	CCSER1	401145	400.819	0.317943	0.307767	1.03306	0.301574	0.668563
ENSMAUG00000001008	Patl2	1705442	1713607		protein associated with topoisomerase II homolog 2 (yeast) [Source:MGI Symbol;Acc:MGI:1914828]	protein_coding			Patl2		ENSG00000229474	PATL2	197135	733.976	0.250782	0.270585	0.926814	0.354023	0.694945
ENSMAUG00000001009	Itch	2474335	2546138		itchy, E3 ubiquitin protein ligase [Source:MGI Symbol;Acc:MGI:1202301]	protein_coding			Itch		ENSG00000078747	ITCH	83737	868.266	0.474713	0.439816	1.07935	0.280434	0.657989
ENSMAUG00000001010	Etnk2	718520	735688	101842792	ethanolamine kinase 2 [Source:NCBI gene;Acc:101842792]	protein_coding			Etnk2	101842792	ENSG00000143845	ETNK2	55224	153.507	-0.360688	0.197868	-1.82287	0.0683232	0.527023
ENSMAUG00000001011	Zfp523	1387339	1415844	101843641	zinc finger protein 76 [Source:NCBI gene;Acc:101843641]	protein_coding			Zfp523	101843641	ENSG00000065029	ZNF76	7629	2938.39	-0.114725	0.102187	-1.1227	0.261565	0.646876
ENSMAUG00000001012	Ttc39c	22681059	22726599	101837649	tetratricopeptide repeat domain 39C [Source:NCBI gene;Acc:101837649]	protein_coding			Ttc39c	101837649	ENSG00000168234	TTC39C	125488	277.066	-0.181918	0.227546	-0.799479	0.424012	0.733101
ENSMAUG00000001013	Txnrd2	7266524	7316491	101834827	thioredoxin reductase 2 [Source:NCBI gene;Acc:101834827]	protein_coding			Txnrd2	101834827	ENSG00000184470	TXNRD2	10587	1204.58	-0.196851	0.148588	-1.32481	0.185234	0.613354
ENSMAUG00000001014	Serpine2	549112	576090		serine (or cysteine) peptidase inhibitor, clade E, member 2 [Source:MGI Symbol;Acc:MGI:101780]	protein_coding			Serpine2		ENSG00000135919	SERPINE2	5270	3651.79	-0.196694	0.193088	-1.01867	0.308359	0.67399
ENSMAUG00000001017	Hoxa7	552638	554517	101828148	homeobox A7 [Source:NCBI gene;Acc:101828148]	protein_coding			Hoxa7	101828148	ENSG00000122592	HOXA7	3204	265.085	-0.296153	0.238448	-1.242	0.214237	0.621679
ENSMAUG00000001018	FN3K	407976	416318			protein_coding					ENSG00000167363	FN3K	64122	10.2545	-0.650803	0.464646	-1.40064	0.161321	0.603765
ENSMAUG00000001020	Nat14	861251	864042	101827275	N-acetyltransferase 14 (putative) [Source:NCBI gene;Acc:101827275]	protein_coding			Nat14	101827275	ENSG00000090971	NAT14	57106	879.983	-0.169785	0.227252	-0.747123	0.454989	0.747782
ENSMAUG00000001021	Ubxn11	7277393	7295135	101831684	UBX domain protein 11 [Source:NCBI gene;Acc:101831684]	protein_coding			Ubxn11	101831684	ENSG00000158062	UBXN11	91544	606.734	-0.137639	0.325039	-0.423454	0.671964	0.857513
ENSMAUG00000001022	Camk1g	1760254	1787210	101834500	calcium/calmodulin dependent protein kinase IG [Source:NCBI gene;Acc:101834500]	protein_coding			Camk1g	101834500	ENSG00000008118	CAMK1G	57172	77.387	-0.128244	0.263972	-0.485826	0.627091	0.837525
ENSMAUG00000001023	SERPINA3	11772615	11780609	101835835	serine protease inhibitor A3N-like [Source:NCBI gene;Acc:101835835]	protein_coding				101835835	ENSG00000196136	SERPINA3	12	2244.05	-0.437061	0.343402	-1.27274	0.203111	0.619941
ENSMAUG00000001024	DNAAF6	435697	475879	101829092	dynein axonemal assembly factor 6 [Source:NCBI gene;Acc:101829092]	protein_coding				101829092	ENSG00000080572	DNAAF6	139212	82.707	0.0820011	0.307276	0.266864	0.789574	0.910189
ENSMAUG00000001025	Uprt	488526	520330	101834780	uracil phosphoribosyltransferase homolog [Source:NCBI gene;Acc:101834780]	protein_coding			Uprt	101834780	ENSG00000094841	UPRT	139596	103.799	0.613677	0.421282	1.45669	0.145202	0.592664
ENSMAUG00000001027	Clu	2459682	2473367	101836902	clusterin [Source:NCBI gene;Acc:101836902]	protein_coding			Clu	101836902	ENSG00000120885	CLU	1191	9980.23	-0.00540019	0.309397	-0.0174539	0.986074	0.995003
ENSMAUG00000001029	Cd84	9926783	9959628	101832121	CD84 molecule [Source:NCBI gene;Acc:101832121]	protein_coding			Cd84	101832121	ENSG00000066294	CD84	8832	205.256	0.33384	0.41853	0.79765	0.425074	0.734001
ENSMAUG00000001031	C7orf61	7811666	7817191			protein_coding					ENSG00000185955	C7orf61	402573	7.60429	-0.324418	0.640572	-0.506451	0.61254	0.831991
ENSMAUG00000001032	Smarcc2	3148912	3175439		SWI/SNF related, matrix associated, actin dependent regulator of chromatin, subfamily c, member 2 [Source:MGI Symbol;Acc:MGI:1915344]	protein_coding			Smarcc2		ENSG00000139613	SMARCC2	6601	8687.73	-0.0672173	0.0855461	-0.785743	0.432018	0.737986
ENSMAUG00000001033	SCNN1A	216893	230753			protein_coding					ENSG00000111319	SCNN1A	6337	2279.89	0.0218999	0.265026	0.082633	0.934143	0.974004
ENSMAUG00000001034	Lcn10	1663026	1665999	101844061	lipocalin 10 [Source:NCBI gene;Acc:101844061]	protein_coding			Lcn10	101844061	ENSG00000187922	LCN10	414332	249.654	-0.0976236	0.332069	-0.293986	0.768768	0.90128
ENSMAUG00000001037	Rgr	709444	722563	101844045	retinal G protein coupled receptor [Source:NCBI gene;Acc:101844045]	protein_coding			Rgr	101844045	ENSG00000148604	RGR	5995	19.0488	0.348375	0.349468	0.996871	0.318827	0.678522
ENSMAUG00000001038	FKBP4	2299976	2301329			protein_coding					ENSG00000004478	FKBP4	2288	235.653	-0.385622	0.198245	-1.94518	0.0517535	0.508843
ENSMAUG00000001040	Adcy4	2429843	2446473	101841504	adenylate cyclase 4 [Source:NCBI gene;Acc:101841504]	protein_coding			Adcy4	101841504	ENSG00000129467	ADCY4	196883	961.015	-0.574013	0.182273	-3.14919	0.00163722	0.137962
ENSMAUG00000001041	Phkg1	245760	255086		phosphorylase kinase gamma 1 [Source:MGI Symbol;Acc:MGI:97579]	protein_coding			Phkg1		ENSG00000164776	PHKG1	5260	41.9657	0.376894	0.319041	1.18133	0.23747	0.632774
ENSMAUG00000001043	Nrtn	6372670	6378292	101828307	neurturin [Source:NCBI gene;Acc:101828307]	protein_coding			Nrtn	101828307	ENSG00000171119	NRTN	4902	89.959	-0.464146	0.275702	-1.6835	0.0922775	0.556997
ENSMAUG00000001044	Tpo	5300317	5356705		thyroid peroxidase [Source:MGI Symbol;Acc:MGI:98813]	protein_coding			Tpo		ENSG00000115705	TPO	7173	14.4559	0.00641581	0.524371	0.0122352	0.990238	0.99652
ENSMAUG00000001045	Ephb4	7403831	7427721	101831963	EPH receptor B4 [Source:NCBI gene;Acc:101831963]	protein_coding			Ephb4	101831963	ENSG00000196411	EPHB4	2050	2855.27	-0.463947	0.249002	-1.86323	0.0624301	0.524211
ENSMAUG00000001046	Tmem67	19159419	19204340	101841046	transmembrane protein 67 [Source:NCBI gene;Acc:101841046]	protein_coding			Tmem67	101841046	ENSG00000164953	TMEM67	91147	442.793	0.240423	0.202715	1.18601	0.235617	0.630444
ENSMAUG00000001047	Rpl22	4064758	4074023	101844682	ribosomal protein L22 [Source:NCBI gene;Acc:101844682]	protein_coding			Rpl22	101844682	ENSG00000116251	RPL22	6146	10331.4	-0.03541	0.194475	-0.18208	0.85552	0.939928
ENSMAUG00000001048	Aamdc	8212474	8239982	101844662	adipogenesis associated Mth938 domain containing [Source:NCBI gene;Acc:101844662]	protein_coding			Aamdc	101844662	ENSG00000087884	AAMDC	28971	641.221	-0.098695	0.201812	-0.489044	0.624811	0.836936
ENSMAUG00000001049	Tlr2	446077	451794	101838156	toll like receptor 2 [Source:NCBI gene;Acc:101838156]	protein_coding			Tlr2	101838156	ENSG00000137462	TLR2	7097	626.058	-0.100851	0.35564	-0.283575	0.776736	0.904805
ENSMAUG00000001050	Fli1	1752523	1793540		Friend leukemia integration 1 [Source:MGI Symbol;Acc:MGI:95554]	protein_coding			Fli1		ENSG00000151702	FLI1	2313	1178.89	0.253156	0.344738	0.734344	0.462739	0.751556
ENSMAUG00000001051	Csnk1a1	12128488	12167877	101837873	casein kinase 1 alpha 1 [Source:NCBI gene;Acc:101837873]	protein_coding			Csnk1a1	101837873	ENSG00000113712	CSNK1A1	1452	3780.87	0.21183	0.243672	0.869326	0.384669	0.713104
ENSMAUG00000001052	Ptpn3	183149	251388		protein tyrosine phosphatase, non-receptor type 3 [Source:MGI Symbol;Acc:MGI:105307]	protein_coding			Ptpn3		ENSG00000070159	PTPN3	5774	1119.38	0.0331599	0.142746	0.2323	0.816305	0.922687
ENSMAUG00000001053	Stam	5814837	5857452	101824557	signal transducing adaptor molecule [Source:NCBI gene;Acc:101824557]	protein_coding			Stam	101824557	ENSG00000136738	STAM	8027	240.822	0.62342	0.525752	1.18577	0.235713	0.630444
ENSMAUG00000001055	Pou2af3	13855745	13863882	101831122	colorectal cancer associated 2 [Source:NCBI gene;Acc:101831122]	protein_coding			Colca2	101831122	ENSG00000214290	COLCA2	120376	412.653	0.164984	0.209976	0.785728	0.432027	0.737986
ENSMAUG00000001057	Fcnb	1335911	1344242	101838013	ficolin 1 [Source:NCBI gene;Acc:101838013]	protein_coding			Fcnb	101838013	ENSG00000085265	FCN1	2219	1742.27	0.208287	0.358807	0.580498	0.561579	0.806327
ENSMAUG00000001058	Eif5	4356680	4363942	101830054	eukaryotic translation initiation factor 5 [Source:NCBI gene;Acc:101830054]	protein_coding				101830054	ENSG00000100664	EIF5	1983	7817.09	0.0805996	0.0827547	0.973957	0.330078	0.684444
ENSMAUG00000001059	Igsf10	3601513	3626082		immunoglobulin superfamily, member 10 [Source:MGI Symbol;Acc:MGI:1923481]	protein_coding			Igsf10		ENSG00000152580	IGSF10	285313	286.247	0.135279	0.251575	0.537726	0.590766	0.82073
ENSMAUG00000001060	TM4SF4	811	8562	101823887	transmembrane 4 L6 family member 4 [Source:NCBI gene;Acc:101823887]	protein_coding				101823887	ENSG00000169903	TM4SF4	7104	9.82837	0.935771	0.859974	1.08814	0.276534	0.656936
ENSMAUG00000001062	Abcb7	616506	745003	101835040	ATP binding cassette subfamily B member 7 [Source:NCBI gene;Acc:101835040]	protein_coding			Abcb7	101835040	ENSG00000131269	ABCB7	22	1056.57	0.305393	0.165767	1.8423	0.0654309	0.525807
ENSMAUG00000001064	Fhad1	5987206	6098642		forkhead-associated (FHA) phosphopeptide binding domain 1 [Source:MGI Symbol;Acc:MGI:1920323]	protein_coding			Fhad1		ENSG00000142621	FHAD1	114827	1783.26	-0.0715779	0.304999	-0.234682	0.814455	0.921871
ENSMAUG00000001065	Trem1	12371601	12381036	101833671	triggering receptor expressed on myeloid cells 1 [Source:NCBI gene;Acc:101833671]	protein_coding			Trem1	101833671	ENSG00000124731	TREM1	54210	224.89	-0.288565	0.622612	-0.463475	0.643024	0.844977
ENSMAUG00000001066	Vil1	4445908	4469467	101832625	villin 1 [Source:NCBI gene;Acc:101832625]	protein_coding			Vil1	101832625	ENSG00000127831	VIL1	7429	10.021	0.249708	0.634418	0.393602	0.693875	0.868188
ENSMAUG00000001067	PM20D1	12259	18159		peptidase M20 domain containing 1 [Source:MGI Symbol;Acc:MGI:2442939]	protein_coding					ENSG00000162877	PM20D1	148811	152.074	-0.199533	0.262794	-0.759276	0.447688	0.743451
ENSMAUG00000001069	Fam20b	5638826	5676326	101836354	FAM20B glycosaminoglycan xylosylkinase [Source:NCBI gene;Acc:101836354]	protein_coding			Fam20b	101836354	ENSG00000116199	FAM20B	9917	5284.47	0.119141	0.105619	1.12803	0.259308	0.645784
ENSMAUG00000001070	TCP1	25	2619	101830320	T-complex protein 1 subunit alpha [Source:NCBI gene;Acc:101830320]	protein_coding				101830320	ENSG00000120438	TCP1	6950	4355.87	-0.0891229	0.105233	-0.84691	0.397045	0.716455
ENSMAUG00000001071	Sptssb	108217	143227	101842121	serine palmitoyltransferase small subunit B [Source:NCBI gene;Acc:101842121]	protein_coding			Sptssb	101842121	ENSG00000196542	SPTSSB	165679	481.735	-0.440941	0.225242	-1.95764	0.0502728	0.507338
ENSMAUG00000001072	Zkscan14	3392	9100	101827033	zinc finger protein 394 [Source:NCBI gene;Acc:101827033]	protein_coding			Zkscan14	101827033	ENSG00000160908	ZNF394	84124	337.957	0.0246904	0.138884	0.177777	0.858898	0.941389
ENSMAUG00000001074	Adsl	3209052	3234222	101836336	adenylosuccinate lyase [Source:NCBI gene;Acc:101836336]	protein_coding			Adsl	101836336	ENSG00000239900	ADSL	158	1573.68	-0.164354	0.111837	-1.46958	0.141674	0.589541
ENSMAUG00000001075	Pole2	15000184	15025865		polymerase (DNA directed), epsilon 2 (p59 subunit) [Source:MGI Symbol;Acc:MGI:1197514]	protein_coding					ENSG00000100479	POLE2	5427	216.257	-0.148505	0.155562	-0.954635	0.339762	0.688523
ENSMAUG00000001076	Ctnnb1	2988789	3016670	101822512	catenin beta 1 [Source:NCBI gene;Acc:101822512]	protein_coding			Ctnnb1	101822512	ENSG00000168036	CTNNB1	1499	22251.8	-0.0186271	0.0784691	-0.237382	0.812361	0.921159
ENSMAUG00000001077	Hbs1l	11009427	11076832	101831545	HBS1 like translational GTPase [Source:NCBI gene;Acc:101831545]	protein_coding			Hbs1l	101831545	ENSG00000112339	HBS1L	10767	2375.14	0.0787698	0.0621242	1.26794	0.204819	0.620449
ENSMAUG00000001078	SLC9A1	6550033	6595029			protein_coding					ENSG00000090020	SLC9A1	6548	686.554	-0.0444213	0.169873	-0.261498	0.793708	0.911077
ENSMAUG00000001079	Cic	745327	768147	101823166	capicua transcriptional repressor [Source:NCBI gene;Acc:101823166]	protein_coding			Cic	101823166	ENSG00000079432	CIC	23152	10535.7	-0.166844	0.138793	-1.20211	0.229322	0.628086
ENSMAUG00000001080	Nes	4531935	4540866	101843961	nestin [Source:NCBI gene;Acc:101843961]	protein_coding			Nes	101843961	ENSG00000132688	NES	10763	11569.8	-0.422083	0.260734	-1.61882	0.105485	0.566931
ENSMAUG00000001082	Tonsl	1239464	1254754	101841674	tonsoku like, DNA repair protein [Source:NCBI gene;Acc:101841674]	protein_coding			Tonsl	101841674	ENSG00000160949	TONSL	4796	88.3069	-0.700122	0.293351	-2.38663	0.0170035	0.373128
ENSMAUG00000001083	Cplane1	5670926	5751053		ciliogenesis and planar polarity effector 1 [Source:MGI Symbol;Acc:MGI:1920942]	protein_coding			Cplane1		ENSG00000197603	CPLANE1	65250	1306.33	0.205759	0.115962	1.77436	0.0760033	0.536916
ENSMAUG00000001085	Mtdh	16533703	16575027	101824167	metadherin [Source:NCBI gene;Acc:101824167]	protein_coding			Mtdh	101824167	ENSG00000147649	MTDH	92140	6745.59	0.0220479	0.0531946	0.414477	0.678525	0.861526
ENSMAUG00000001086	Rad21l	13053510	13089418	101828986	RAD21 cohesin complex component like 1 [Source:NCBI gene;Acc:101828986]	protein_coding			Rad21l	101828986	ENSG00000244588	RAD21L1	642636	13.399	1.36104	0.555423	2.45045	0.0142678	0.346908
ENSMAUG00000001088	Faah	5984931	6001248	101841980	fatty acid amide hydrolase [Source:NCBI gene;Acc:101841980]	protein_coding			Faah	101841980	ENSG00000117480	FAAH	2166	823.643	-0.370134	0.228404	-1.62052	0.10512	0.566178
ENSMAUG00000001089	Ppp1r15b	496046	500682	101826365	protein phosphatase 1 regulatory subunit 15B [Source:NCBI gene;Acc:101826365]	protein_coding			Ppp1r15b	101826365	ENSG00000158615	PPP1R15B	84919	736.873	0.555443	0.448191	1.2393	0.215234	0.621679
ENSMAUG00000001090	E2F4	569813	570602			protein_coding					ENSG00000205250	E2F4	1874	670.037	-0.227154	0.100581	-2.25843	0.0239189	0.41845
ENSMAUG00000001092	Scn4b	7672391	7688849	101837861	sodium voltage-gated channel beta subunit 4 [Source:NCBI gene;Acc:101837861]	protein_coding			Scn4b	101837861	ENSG00000177098	SCN4B	6330	87.9302	0.466123	0.425475	1.09554	0.273282	0.65472
ENSMAUG00000001093	SERPINB6	19266410	19275054			protein_coding					ENSG00000124570	SERPINB6	5269	2549.52	-0.170592	0.108432	-1.57326	0.115658	0.57294
ENSMAUG00000001094	Tram2	2470347	2540646	101827409	translocation associated membrane protein 2 [Source:NCBI gene;Acc:101827409]	protein_coding			Tram2	101827409	ENSG00000065308	TRAM2	9697	145.043	0.42553	0.299296	1.42177	0.155092	0.600054
ENSMAUG00000001095	Zbp1	7118968	7128415	101835595	Z-DNA binding protein 1 [Source:NCBI gene;Acc:101835595]	protein_coding			Zbp1	101835595	ENSG00000124256	ZBP1	81030	868.886	1.31187	0.381231	3.44115	0.000579246	0.0692741
ENSMAUG00000001097	Cep192	6009921	6083034	101827155	centrosomal protein 192 [Source:NCBI gene;Acc:101827155]	protein_coding			Cep192	101827155	ENSG00000101639	CEP192	55125	467.342	0.0381851	0.129256	0.295422	0.767671	0.900801
ENSMAUG00000001098	Avpr2	664494	666912	101832425	arginine vasopressin receptor 2 [Source:NCBI gene;Acc:101832425]	protein_coding			Avpr2	101832425	ENSG00000126895	AVPR2	554	14.1337	0.480431	0.36756	1.30708	0.191185	0.615704
ENSMAUG00000001100	Crbn	16665572	16682457	101838910	cereblon [Source:NCBI gene;Acc:101838910]	protein_coding			Crbn	101838910	ENSG00000113851	CRBN	51185	1377.97	0.0865331	0.107423	0.805539	0.420509	0.731946
ENSMAUG00000001101	Amot	4525636	4584452	101824730	angiomotin [Source:NCBI gene;Acc:101824730]	protein_coding			Amot	101824730	ENSG00000126016	AMOT	154796	500.611	0.606594	0.236901	2.56054	0.0104509	0.312643
ENSMAUG00000001102	Rnf121	12763534	12799108		ring finger protein 121 [Source:MGI Symbol;Acc:MGI:1922462]	protein_coding			Rnf121		ENSG00000137522	RNF121	55298	713.935	-0.164357	0.101056	-1.6264	0.103864	0.564955
ENSMAUG00000001103	Slc44a5	3784710	4071678		solute carrier family 44, member 5 [Source:MGI Symbol;Acc:MGI:3035141]	protein_coding			Slc44a5		ENSG00000137968	SLC44A5	204962	3.51312	0.304193	0.920256	0.330552	0.740983	0.889058
ENSMAUG00000001104	Gsap	2747168	2841746		gamma-secretase activating protein [Source:MGI Symbol;Acc:MGI:2442259]	protein_coding			Gsap		ENSG00000186088	GSAP	54103	4390.28	0.241971	0.1394	1.7358	0.0826	0.54253
ENSMAUG00000001107	Marco	4159897	4190481	101834359	macrophage receptor with collagenous structure [Source:NCBI gene;Acc:101834359]	protein_coding			Marco	101834359	ENSG00000019169	MARCO	8685	24972.6	-0.142885	0.298068	-0.479372	0.631674	0.839734
ENSMAUG00000001108	1700020L24Rik	650	2766	101826953	chromosome unknown C17orf50 homolog [Source:NCBI gene;Acc:101826953]	protein_coding			1700020L24Rik	101826953	ENSG00000270806	C17orf50	146853	1206.87	-0.622569	0.177753	-3.50244	0.000461012	0.0589387
ENSMAUG00000001109	Olfm1	1459724	1497474	101830651	olfactomedin 1 [Source:NCBI gene;Acc:101830651]	protein_coding			Olfm1	101830651	ENSG00000130558	OLFM1	10439	236.912	-0.515733	0.428982	-1.20223	0.229276	0.628086
ENSMAUG00000001111	Sh2d4a	11699253	11759443		SH2 domain containing 4A [Source:MGI Symbol;Acc:MGI:1919531]	protein_coding			Sh2d4a		ENSG00000104611	SH2D4A	63898	2503.44	0.268345	0.155391	1.72691	0.0841846	0.54595
ENSMAUG00000001112	Usp53	7630830	7669613		ubiquitin specific peptidase 53 [Source:MGI Symbol;Acc:MGI:2139607]	protein_coding			Usp53		ENSG00000145390	USP53	54532	357.371	0.32938	0.305779	1.07718	0.281399	0.658597
ENSMAUG00000001113	Pigh	4859433	4870593	101826005	phosphatidylinositol glycan anchor biosynthesis class H [Source:NCBI gene;Acc:101826005]	protein_coding			Pigh	101826005	ENSG00000100564	PIGH	5283	349.919	0.0318913	0.125822	0.253464	0.79991	0.914058
ENSMAUG00000001114	Zbtb26	4708933	4721331	101829554	zinc finger and BTB domain containing 26 [Source:NCBI gene;Acc:101829554]	protein_coding			Zbtb26	101829554	ENSG00000171448	ZBTB26	57684	343.447	0.30385	0.1911	1.59001	0.111834	0.569642
ENSMAUG00000001115	Marveld3	2617116	2629447	101844116	MARVEL domain containing 3 [Source:NCBI gene;Acc:101844116]	protein_coding			Marveld3	101844116	ENSG00000140832	MARVELD3	91862	86.2184	0.133792	0.256376	0.521861	0.601767	0.826208
ENSMAUG00000001116	Plec	808064	867771	101836251	plectin [Source:NCBI gene;Acc:101836251]	protein_coding			Plec	101836251	ENSG00000178209	PLEC	5339	31526.6	-0.267423	0.183474	-1.45755	0.144964	0.592664
ENSMAUG00000001118	Sstr2	8017001	8023255	101831657	somatostatin receptor 2 [Source:NCBI gene;Acc:101831657]	protein_coding			Sstr2	101831657	ENSG00000180616	SSTR2	6752	7.62172	0.59978	0.63975	0.937522	0.34849	0.692805
ENSMAUG00000001119	PER3	5413276	5433607			protein_coding					ENSG00000049246	PER3	8863	421.093	-1.728	0.449872	-3.84109	0.00012249	0.0234003
ENSMAUG00000001120	Mab21l4	11106576	11116941	101836216	mab-21 like 4 [Source:NCBI gene;Acc:101836216]	protein_coding			Mab21l4	101836216	ENSG00000172478	MAB21L4	79919	1173.77	-0.0780822	0.222631	-0.350724	0.725795	0.882497
ENSMAUG00000001123	Ssbp3	12559794	12700591	101840733	single stranded DNA binding protein 3 [Source:NCBI gene;Acc:101840733]	protein_coding			Ssbp3	101840733	ENSG00000157216	SSBP3	23648	2656.99	-0.0951481	0.145328	-0.654711	0.512654	0.781141
ENSMAUG00000001124	CABLES2	3573	4823			protein_coding					ENSG00000149679	CABLES2	81928	352.606	0.254123	0.152307	1.66849	0.0952184	0.559961
ENSMAUG00000001125	Plcd4	4328638	4346775		phospholipase C, delta 4 [Source:MGI Symbol;Acc:MGI:107469]	protein_coding			Plcd4		ENSG00000115556	PLCD4	84812	67.1795	-0.0883784	0.208997	-0.422868	0.672391	0.857739
ENSMAUG00000001126	Epb41l2	7500980	7576082	101824316	erythrocyte membrane protein band 4.1 like 2 [Source:NCBI gene;Acc:101824316]	protein_coding			Epb41l2	101824316	ENSG00000079819	EPB41L2	2037	5628.81	0.209101	0.219544	0.952434	0.340877	0.689441
ENSMAUG00000001128	Ppp1r13b	4030275	4064194	101828528	protein phosphatase 1 regulatory subunit 13B [Source:NCBI gene;Acc:101828528]	protein_coding			Ppp1r13b	101828528	ENSG00000088808	PPP1R13B	23368	1728.8	-0.183347	0.154744	-1.18484	0.236082	0.630953
ENSMAUG00000001129	Hoxa3	557007	600954	101829127	homeobox A3 [Source:NCBI gene;Acc:101829127]	protein_coding			Hoxa3	101829127	ENSG00000105997	HOXA3	3200	866.083	-0.217105	0.165369	-1.31285	0.189232	0.614558
ENSMAUG00000001130	Meis1	11993128	12131890	101836973	Meis homeobox 1 [Source:NCBI gene;Acc:101836973]	protein_coding			Meis1	101836973	ENSG00000143995	MEIS1	4211	1881.52	0.0634407	0.196542	0.322784	0.746859	0.892916
ENSMAUG00000001131	Tcn2	22676921	22695241	101833235	transcobalamin 2 [Source:NCBI gene;Acc:101833235]	protein_coding			Tcn2	101833235	ENSG00000185339	TCN2	6948	13665	-0.110962	0.122655	-0.904669	0.365641	0.700423
ENSMAUG00000001132	RCCD1	354	2002	101840351	RCC1 domain-containing protein 1 [Source:NCBI gene;Acc:101840351]	protein_coding				101840351	ENSG00000166965	RCCD1	91433	314.685	-0.05427	0.132302	-0.4102	0.681659	0.862439
ENSMAUG00000001133	Rbm22	13137759	13149080	101843143	RNA binding motif protein 22 [Source:NCBI gene;Acc:101843143]	protein_coding			Rbm22	101843143	ENSG00000086589	RBM22	55696	2329.51	-0.148652	0.0771039	-1.92794	0.0538623	0.510218
ENSMAUG00000001134	Erp44	1846530	1933373	101837982	endoplasmic reticulum protein 44 [Source:NCBI gene;Acc:101837982]	protein_coding			Erp44	101837982	ENSG00000023318	ERP44	23071	2744.56	-0.0288612	0.0523545	-0.551265	0.581452	0.816608
ENSMAUG00000001135	B3galnt1	344993	386943	101842661	beta-1,3-N-acetylgalactosaminyltransferase 1 (globoside blood group) [Source:NCBI gene;Acc:101842661]	protein_coding			B3galnt1	101842661	ENSG00000169255	B3GALNT1	8706	758.235	0.238631	0.146945	1.62394	0.104388	0.564955
ENSMAUG00000001136	Tmem33	2333104	2357047	101823384	transmembrane protein 33 [Source:NCBI gene;Acc:101823384]	protein_coding			Tmem33	101823384	ENSG00000109133	TMEM33	55161	2494.6	0.187855	0.105534	1.78003	0.0750705	0.535541
ENSMAUG00000001137	Actn4	1212729	1276647		actinin alpha 4 [Source:MGI Symbol;Acc:MGI:1890773]	protein_coding			Actn4		ENSG00000130402	ACTN4	81	8157.64	0.147718	0.174962	0.844285	0.39851	0.717601
ENSMAUG00000001138	Tmem177	6495	9694	101839367	transmembrane protein 177 [Source:NCBI gene;Acc:101839367]	protein_coding			Tmem177	101839367	ENSG00000144120	TMEM177	80775	239.896	-0.344185	0.161739	-2.12802	0.0333352	0.465053
ENSMAUG00000001140	GPM6A	29604880	29611273			protein_coding					ENSG00000150625	GPM6A	2823	2919.68	0.974363	0.74914	1.30064	0.193381	0.615856
ENSMAUG00000001141	Ada	2589728	2599798		adenosine deaminase [Source:MGI Symbol;Acc:MGI:87916]	protein_coding			Ada		ENSG00000196839	ADA	100	760.237	-0.682042	0.519329	-1.31331	0.189077	0.614558
ENSMAUG00000001142	Elof1	8086040	8091689	101823840	elongation factor 1 homolog [Source:NCBI gene;Acc:101823840]	protein_coding			Elof1	101823840	ENSG00000130165	ELOF1	84337	3519.79	-0.177384	0.18494	-0.959147	0.337485	0.687437
ENSMAUG00000001143	Gng14	855212	855583	101837924	G protein subunit gamma 14 [Source:NCBI gene;Acc:101837924]	protein_coding								8.00739	-1.06196	0.559425	-1.8983	0.0576563	0.514592
ENSMAUG00000001144	Mpv17l2	367656	370226		MPV17 mitochondrial membrane protein-like 2 [Source:MGI Symbol;Acc:MGI:2681846]	protein_coding			Mpv17l2		ENSG00000254858	MPV17L2	84769	1433.58	-0.187709	0.20544	-0.913692	0.360879	0.699465
ENSMAUG00000001145	Gadd45gip1	617534	620382	101834163	GADD45G interacting protein 1 [Source:NCBI gene;Acc:101834163]	protein_coding			Gadd45gip1	101834163	ENSG00000179271	GADD45GIP1	90480	2594.02	-0.230769	0.179572	-1.2851	0.198757	0.619155
ENSMAUG00000001146	Arhgef5	3201388	3217640	101827962	Rho guanine nucleotide exchange factor 5 [Source:NCBI gene;Acc:101827962]	protein_coding			Arhgef5	101827962	ENSG00000050327	ARHGEF5	7984	2547.43	-0.0172779	0.111592	-0.15483	0.876955	0.949927
ENSMAUG00000001147	Efhd2	5954652	5971241	101844483	EF-hand domain family member D2 [Source:NCBI gene;Acc:101844483]	protein_coding			Efhd2	101844483	ENSG00000142634	EFHD2	79180	9752.99	-0.220583	0.160904	-1.3709	0.170407	0.60869
ENSMAUG00000001148	TPM3	304923	309247			protein_coding					ENSG00000143549	TPM3	7170	3815.78	0.189388	0.205958	0.919548	0.357809	0.696977
ENSMAUG00000001149	Tmem179	3411885	3423507	101827574	transmembrane protein 179 [Source:NCBI gene;Acc:101827574]	protein_coding			Tmem179	101827574	ENSG00000258986	TMEM179	388021	10.0407	-0.726741	1.2423	-0.584998	0.558549	0.8052
ENSMAUG00000001150	Cnpy2	3287677	3298875		canopy FGF signaling regulator 2 [Source:MGI Symbol;Acc:MGI:1928477]	protein_coding								1870.16	-0.111997	0.139489	-0.802912	0.422026	0.732162
ENSMAUG00000001151	Rab39	16329656	16347992	101834886	RAB39A, member RAS oncogene family [Source:NCBI gene;Acc:101834886]	protein_coding			Rab39	101834886	ENSG00000179331	RAB39A	54734	52.0464	0.542953	0.389913	1.3925	0.163772	0.605723
ENSMAUG00000001152	Lta4h	6913375	6945205	101831384	leukotriene A4 hydrolase [Source:NCBI gene;Acc:101831384]	protein_coding			Lta4h	101831384	ENSG00000111144	LTA4H	4048	5270.31	0.047975	0.171226	0.280186	0.779335	0.906316
ENSMAUG00000001153	Ruvbl1	5310348	5345835	101833588	RuvB like AAA ATPase 1 [Source:NCBI gene;Acc:101833588]	protein_coding			Ruvbl1	101833588	ENSG00000175792	RUVBL1	8607	1781.09	-0.0563949	0.169199	-0.333304	0.738905	0.888232
ENSMAUG00000001155	Lynx1	2812050	2817112	101842659	Ly6/neurotoxin 1 [Source:NCBI gene;Acc:101842659]	protein_coding								606.031	0.0378381	0.323674	0.116902	0.906938	0.963532
ENSMAUG00000001156	Tinagl1	3508798	3517373	101837983	tubulointerstitial nephritis antigen like 1 [Source:NCBI gene;Acc:101837983]	protein_coding			Tinagl1	101837983	ENSG00000142910	TINAGL1	64129	3801.84	0.0585847	0.123641	0.473828	0.635623	0.841586
ENSMAUG00000001158	Plscr5	2280070	2301057	101829015	phospholipid scramblase family member 5 [Source:NCBI gene;Acc:101829015]	protein_coding			Plscr5	101829015	ENSG00000231213	PLSCR5	389158	21.6862	-0.128161	0.534223	-0.239902	0.810406	0.92044
ENSMAUG00000001159	Homez	1505030	1513113		homeodomain leucine zipper-encoding gene [Source:MGI Symbol;Acc:MGI:2678023]	protein_coding			Homez		ENSG00000215271	HOMEZ	57594	453.874	0.248936	0.115631	2.15284	0.0313314	0.459965
ENSMAUG00000001160	Mpdu1	7486670	7491249	101832610	mannose-P-dolichol utilization defect 1 [Source:NCBI gene;Acc:101832610]	protein_coding			Mpdu1	101832610	ENSG00000129255	MPDU1	9526	2423.8	-0.205207	0.134169	-1.52947	0.126147	0.578982
ENSMAUG00000001161	Cdkn2d	8905878	8908357	101831333	cyclin dependent kinase inhibitor 2D [Source:NCBI gene;Acc:101831333]	protein_coding			Cdkn2d	101831333	ENSG00000129355	CDKN2D	1032	1525.4	-0.142946	0.245663	-0.581878	0.560649	0.805917
ENSMAUG00000001162	Aox2	20045360	20130117	101823275	aldehyde oxidase 2 [Source:NCBI gene;Acc:101823275]	protein_coding								42.1431	-2.43339	1.37901	-1.76458	0.0776338	0.537298
ENSMAUG00000001164	CPNE4	1165361	1173969			protein_coding					ENSG00000196353	CPNE4	131034	6.07737	-1.12252	0.802471	-1.39883	0.161863	0.604754
ENSMAUG00000001166	Hoxa6	561340	563773	101828860	homeobox A6 [Source:NCBI gene;Acc:101828860]	protein_coding			Hoxa6	101828860	ENSG00000106006	HOXA6	3203	38.7901	0.331683	0.301598	1.09975	0.271441	0.653675
ENSMAUG00000001169	Rwdd4a	22558193	22577156	101826764	RWD domain containing 4 [Source:NCBI gene;Acc:101826764]	protein_coding			Rwdd4a	101826764	ENSG00000182552	RWDD4	201965	1289.29	0.105554	0.0777642	1.35736	0.174666	0.611361
ENSMAUG00000001170	Gtdc1	5167802	5381488	101840171	glycosyltransferase like domain containing 1 [Source:NCBI gene;Acc:101840171]	protein_coding			Gtdc1	101840171	ENSG00000121964	GTDC1	79712	448.055	0.0446224	0.169423	0.263379	0.792258	0.910425
ENSMAUG00000001171	Zfp354c	1061609	1079506	101834806	zinc finger protein 879 [Source:NCBI gene;Acc:101834806]	protein_coding			Zfp354c	101834806	ENSG00000177932	ZNF354C	30832	28.0087	0.943591	0.61812	1.52655	0.126873	0.579549
ENSMAUG00000001172	Aldh1a3	3611498	3644844	101827627	aldehyde dehydrogenase 1 family member A3 [Source:NCBI gene;Acc:101827627]	protein_coding			Aldh1a3	101827627	ENSG00000184254	ALDH1A3	220	827.666	0.451552	0.281674	1.6031	0.108912	0.568991
ENSMAUG00000001173	PYURF	201585	203205	101827508	PIGY upstream reading frame [Source:NCBI gene;Acc:101827508]	protein_coding			Pyurf	101827508	ENSG00000145337	PYURF	100996939	1804.18	-0.194161	0.154984	-1.25278	0.210285	0.621679
ENSMAUG00000001174	Atp8b2	6498336	6522591	101843516	ATPase phospholipid transporting 8B2 [Source:NCBI gene;Acc:101843516]	protein_coding			Atp8b2	101843516	ENSG00000143515	ATP8B2	57198	2788.34	-0.0150223	0.110489	-0.135962	0.891851	0.957671
ENSMAUG00000001175	Mtbp	1060301	1133147		Mdm2, transformed 3T3 cell double minute p53 binding protein [Source:MGI Symbol;Acc:MGI:2146005]	protein_coding			Mtbp		ENSG00000172167	MTBP	27085	260.472	0.0376287	0.147306	0.255446	0.798378	0.91281
ENSMAUG00000001176	SLC4A4	8787832	8806529			protein_coding					ENSG00000080493	SLC4A4	8671	9.82065	1.12214	0.762981	1.47073	0.141364	0.589447
ENSMAUG00000001177	Pmepa1	7135484	7187669	101831761	prostate transmembrane protein, androgen induced 1 [Source:NCBI gene;Acc:101831761]	protein_coding			Pmepa1	101831761	ENSG00000124225	PMEPA1	56937	4401.6	-0.020343	0.155812	-0.130561	0.896123	0.959306
ENSMAUG00000001178	SLC16A4	299	3669	101836790	monocarboxylate transporter 5-like [Source:NCBI gene;Acc:101836790]	protein_coding				101836790	ENSG00000168679	SLC16A4	9122	89.2494	0.409849	0.254631	1.60958	0.107489	0.567727
ENSMAUG00000001179	Nav1	2729625	2873335		neuron navigator 1 [Source:MGI Symbol;Acc:MGI:2183683]	protein_coding			Nav1		ENSG00000134369	NAV1	89796	1302.05	-0.0400523	0.173029	-0.231477	0.816945	0.922869
ENSMAUG00000001180	Sparcl1	3817044	3846212	101828290	SPARC like 1 [Source:NCBI gene;Acc:101828290]	protein_coding			Sparcl1	101828290	ENSG00000152583	SPARCL1	8404	25234.2	-0.344191	0.233607	-1.47338	0.14065	0.588768
ENSMAUG00000001181	Fyb	3935447	4023736	101834385	FYN binding protein 1 [Source:NCBI gene;Acc:101834385]	protein_coding			Fyb	101834385	ENSG00000082074	FYB1	2533	693.643	0.361393	0.409352	0.882841	0.377322	0.709136
ENSMAUG00000001182	Usp30	2588031	2641577	101823747	ubiquitin specific peptidase 30 [Source:NCBI gene;Acc:101823747]	protein_coding			Usp30	101823747	ENSG00000135093	USP30	84749	1274.25	0.061698	0.0608468	1.01399	0.310588	0.675013
ENSMAUG00000001183	MKRN1	1441964	1463253		makorin, ring finger protein, 1 [Source:MGI Symbol;Acc:MGI:1859353]	protein_coding			Mkrn1		ENSG00000133606	MKRN1	23608	1908.98	0.16	0.087335	1.83203	0.066947	0.525807
ENSMAUG00000001184	Zdhhc20	10581686	10634008	101828555	zinc finger DHHC-type palmitoyltransferase 20 [Source:NCBI gene;Acc:101828555]	protein_coding			Zdhhc20	101828555	ENSG00000180776	ZDHHC20	253832	329.199	0.45096	0.311894	1.44588	0.148212	0.594745
ENSMAUG00000001185	Vcp	7311864	7330179	101836911	valosin containing protein [Source:NCBI gene;Acc:101836911]	protein_coding			Vcp	101836911	ENSG00000165280	VCP	7415	17386.1	-0.133267	0.0846336	-1.57464	0.11534	0.572717
ENSMAUG00000001186	ANK2	4434275	4990252			protein_coding					ENSG00000145362	ANK2	287	110.867	0.458413	0.488379	0.938643	0.347914	0.69248
ENSMAUG00000001187	Necab2	12428459	12454822	101833756	N-terminal EF-hand calcium binding protein 2 [Source:NCBI gene;Acc:101833756]	protein_coding			Necab2	101833756	ENSG00000103154	NECAB2	54550	10.0241	0.0334858	0.660428	0.0507032	0.959562	0.983875
ENSMAUG00000001188	Fxr1	14083337	14133342	101838312	FMR1 autosomal homolog 1 [Source:NCBI gene;Acc:101838312]	protein_coding			Fxr1	101838312	ENSG00000114416	FXR1	8087	3309.79	-0.0623731	0.0837319	-0.744914	0.456323	0.74845
ENSMAUG00000001189	Ddr2	18418356	18462847	101841710	discoidin domain receptor tyrosine kinase 2 [Source:NCBI gene;Acc:101841710]	protein_coding			Ddr2	101841710	ENSG00000162733	DDR2	4921	550.811	0.594365	0.526937	1.12796	0.259336	0.645784
ENSMAUG00000001191	Cbll1	1853	7127	101825645	Cbl proto-oncogene like 1 [Source:NCBI gene;Acc:101825645]	protein_coding			Cbll1	101825645	ENSG00000105879	CBLL1	79872	441.899	0.214044	0.218267	0.980652	0.326765	0.682965
ENSMAUG00000001193	Ptpdc1	4366344	4419507	101838185	protein tyrosine phosphatase domain containing 1 [Source:NCBI gene;Acc:101838185]	protein_coding			Ptpdc1	101838185	ENSG00000158079	PTPDC1	138639	605.736	-0.168995	0.114624	-1.47434	0.14039	0.588021
ENSMAUG00000001195	Myo5a	12831661	12932027		myosin VA [Source:MGI Symbol;Acc:MGI:105976]	protein_coding			Myo5a		ENSG00000197535	MYO5A	4644	455.527	0.557743	0.321011	1.73746	0.0823064	0.54147
ENSMAUG00000001196	Pxylp1	6638021	6698941		2-phosphoxylose phosphatase 1 [Source:MGI Symbol;Acc:MGI:2442444]	protein_coding			Pxylp1		ENSG00000155893	PXYLP1	92370	528.421	-0.0671147	0.211853	-0.316798	0.751397	0.893753
ENSMAUG00000001197	Cilk1	9884716	9946019	101844120	ciliogenesis associated kinase 1 [Source:NCBI gene;Acc:101844120]	protein_coding			Cilk1	101844120	ENSG00000112144	CILK1	22858	671.052	-0.0042484	0.139181	-0.0305243	0.975649	0.991146
ENSMAUG00000001199	Wdr25	6945028	7092644	101834534	WD repeat domain 25 [Source:NCBI gene;Acc:101834534]	protein_coding			Wdr25	101834534	ENSG00000176473	WDR25	79446	413.075	-0.194933	0.195076	-0.999262	0.317668	0.677722
ENSMAUG00000001200	Lrrc42	12337981	12358103	101839205	leucine rich repeat containing 42 [Source:NCBI gene;Acc:101839205]	protein_coding			Lrrc42	101839205	ENSG00000116212	LRRC42	115353	1410.62	0.0170773	0.127687	0.133743	0.893606	0.958507
ENSMAUG00000001201	Fam161b	1506743	1520525	101841947	FAM161 centrosomal protein B [Source:NCBI gene;Acc:101841947]	protein_coding			Fam161b	101841947	ENSG00000156050	FAM161B	145483	203.293	0.108954	0.241746	0.450698	0.652207	0.848687
ENSMAUG00000001202	Taf5l	427202	440167	101841669	TATA-box binding protein associated factor 5 like [Source:NCBI gene;Acc:101841669]	protein_coding			Taf5l	101841669	ENSG00000135801	TAF5L	27097	818.479	0.0134215	0.0962028	0.139513	0.889045	0.956073
ENSMAUG00000001203	Nphp4	3838009	3919320	101843419	nephrocystin 4 [Source:NCBI gene;Acc:101843419]	protein_coding			Nphp4	101843419	ENSG00000131697	NPHP4	261734	297.519	0.0847087	0.27252	0.310835	0.755926	0.895881
ENSMAUG00000001205	Rnf44	916432	926627	101823573	ring finger protein 44 [Source:NCBI gene;Acc:101823573]	protein_coding			Rnf44	101823573	ENSG00000146083	RNF44	22838	4150.75	0.0244136	0.120055	0.203354	0.838859	0.933052
ENSMAUG00000001206	Cenpi	1259906	1307047	101844114	centromere protein I [Source:NCBI gene;Acc:101844114]	protein_coding			Cenpi	101844114	ENSG00000102384	CENPI	2491	39.7114	-0.00616703	0.413757	-0.014905	0.988108	0.995894
ENSMAUG00000001207	Rap2c	421	14055	101836183	RAP2C, member of RAS oncogene family [Source:NCBI gene;Acc:101836183]	protein_coding			Rap2c	101836183	ENSG00000123728	RAP2C	57826	1919.4	0.293709	0.129303	2.27148	0.0231181	0.415499
ENSMAUG00000001208	Trak2	19560979	19617980	101824949	trafficking kinesin protein 2 [Source:NCBI gene;Acc:101824949]	protein_coding			Trak2	101824949	ENSG00000115993	TRAK2	66008	5709.63	0.168818	0.219274	0.769895	0.441362	0.74157
ENSMAUG00000001210	Hbegf	79982	90566	101831451	heparin binding EGF like growth factor [Source:NCBI gene;Acc:101831451]	protein_coding			Hbegf	101831451	ENSG00000113070	HBEGF	1839	838.784	0.0504616	0.193039	0.261406	0.793779	0.911087
ENSMAUG00000001211	Mex3b	8381241	8384710	101838679	mex-3 RNA binding family member B [Source:NCBI gene;Acc:101838679]	protein_coding			Mex3b	101838679	ENSG00000183496	MEX3B	84206	194.072	-0.283445	0.34161	-0.829732	0.406691	0.723213
ENSMAUG00000001214	Kics2	9230519	9250932	101842093	chromosome unknown C12orf66 homolog [Source:NCBI gene;Acc:101842093]	protein_coding			BC048403	101842093	ENSG00000174206	KICS2	144577	435.927	0.292243	0.15543	1.88022	0.0600781	0.518934
ENSMAUG00000001215	Ift74	8857087	8957787		intraflagellar transport 74 [Source:MGI Symbol;Acc:MGI:1914944]	protein_coding			Ift74		ENSG00000096872	IFT74	80173	379.015	0.0173667	0.14594	0.118998	0.905277	0.962865
ENSMAUG00000001216	Prkch	10224667	10448550		protein kinase C, eta [Source:MGI Symbol;Acc:MGI:97600]	protein_coding								1382.88	-0.0317956	0.251523	-0.126412	0.899405	0.960663
ENSMAUG00000001217	Adh5	887837	901331		alcohol dehydrogenase 5 (class III), chi polypeptide [Source:MGI Symbol;Acc:MGI:87929]	protein_coding			Adh5		ENSG00000197894	ADH5	128	3496.92	-0.0394857	0.0770984	-0.512147	0.608548	0.830704
ENSMAUG00000001218	Tbrg1	352665	362853	101827578	transforming growth factor beta regulator 1 [Source:NCBI gene;Acc:101827578]	protein_coding			Tbrg1	101827578	ENSG00000154144	TBRG1	84897	2727.79	-0.0249866	0.0944832	-0.264455	0.791429	0.910189
ENSMAUG00000001219	EPC2	9824184	9858426			protein_coding					ENSG00000135999	EPC2	26122	125.071	0.532671	0.552003	0.964978	0.334556	0.687072
ENSMAUG00000001220	Supt7l	6275987	6285412	101826883	SPT7 like, STAGA complex subunit gamma [Source:NCBI gene;Acc:101826883]	protein_coding			Supt7l	101826883	ENSG00000119760	SUPT7L	9913	479.012	-0.0322623	0.108341	-0.297784	0.765868	0.89969
ENSMAUG00000001222	Stab1	849628	878863		stabilin 1 [Source:MGI Symbol;Acc:MGI:2178742]	protein_coding			Stab1		ENSG00000010327	STAB1	23166	1339.07	-0.238355	0.28002	-0.851208	0.394654	0.71605
ENSMAUG00000001227	Tm4sf1	1739469	1744966	101833523	transmembrane 4 L six family member 1 [Source:NCBI gene;Acc:101833523]	protein_coding			Tm4sf1	101833523	ENSG00000169908	TM4SF1	4071	8002.57	0.410274	0.444302	0.923413	0.355792	0.696156
ENSMAUG00000001229	Ppip5k1	895737	937688	101838924	diphosphoinositol pentakisphosphate kinase 1 [Source:NCBI gene;Acc:101838924]	protein_coding			Ppip5k1	101838924	ENSG00000168781	PPIP5K1	9677	1671.1	0.220244	0.097939	2.24878	0.0245263	0.422006
ENSMAUG00000001230	C1R	579920	591126	101837653	complement C1r [Source:NCBI gene;Acc:101837653]	protein_coding				101837653	ENSG00000159403	C1R	715	9487.78	0.464829	0.436638	1.06456	0.287073	0.660562
ENSMAUG00000001231	Tsks	1946635	1968321		testis-specific serine kinase substrate [Source:MGI Symbol;Acc:MGI:1347560]	protein_coding			Tsks		ENSG00000126467	TSKS	60385	8.12604	0.366146	0.442313	0.827799	0.407784	0.724007
ENSMAUG00000001233	Mettl15	14512677	14674159	101837914	methyltransferase like 15 [Source:NCBI gene;Acc:101837914]	protein_coding			Mettl15	101837914	ENSG00000169519	METTL15	196074	189.605	0.221265	0.152729	1.44875	0.147408	0.593989
ENSMAUG00000001234	Npdc1	1915749	1922042	101825781	neural proliferation, differentiation and control 1 [Source:NCBI gene;Acc:101825781]	protein_coding			Npdc1	101825781	ENSG00000107281	NPDC1	56654	5788.44	-0.294299	0.163644	-1.79841	0.0721125	0.53195
ENSMAUG00000001235	Plcd3	19526763	19549120	101823723	phospholipase C delta 3 [Source:NCBI gene;Acc:101823723]	protein_coding			Plcd3	101823723	ENSG00000161714	PLCD3	113026	521.039	0.371859	0.274112	1.3566	0.174909	0.611361
ENSMAUG00000001237	Srp72	1415843	1440391	101841212	signal recognition particle 72 [Source:NCBI gene;Acc:101841212]	protein_coding			Srp72	101841212	ENSG00000174780	SRP72	6731	3204.58	0.0306672	0.068027	0.45081	0.652127	0.848687
ENSMAUG00000001238	Crlf3	7288381	7329031	101843607	cytokine receptor like factor 3 [Source:NCBI gene;Acc:101843607]	protein_coding			Crlf3	101843607	ENSG00000176390	CRLF3	51379	1519.43	0.220134	0.134986	1.63079	0.102935	0.564955
ENSMAUG00000001239	Cdk20	9279988	9286988	101825499	cyclin dependent kinase 20 [Source:NCBI gene;Acc:101825499]	protein_coding			Cdk20	101825499	ENSG00000156345	CDK20	23552	859.137	-0.17415	0.109982	-1.58345	0.11332	0.569642
ENSMAUG00000001240	Asap2	521556	674241		ArfGAP with SH3 domain, ankyrin repeat and PH domain 2 [Source:MGI Symbol;Acc:MGI:2685438]	protein_coding			Asap2		ENSG00000151693	ASAP2	8853	899.268	0.0907284	0.318001	0.285308	0.775408	0.904181
ENSMAUG00000001241	Lpcat3	488166	533546	101822631	lysophosphatidylcholine acyltransferase 3 [Source:NCBI gene;Acc:101822631]	protein_coding			Lpcat3	101822631	ENSG00000111684	LPCAT3	10162	2501.3	0.173643	0.144356	1.20288	0.229022	0.628086
ENSMAUG00000001242	Zmynd19	2367779	2379507	101835713	zinc finger MYND-type containing 19 [Source:NCBI gene;Acc:101835713]	protein_coding			Zmynd19	101835713	ENSG00000165724	ZMYND19	116225	912.861	-0.124737	0.0912662	-1.36674	0.171707	0.609353
ENSMAUG00000001245	Enpp3	8176535	8244665		ectonucleotide pyrophosphatase/phosphodiesterase 3 [Source:MGI Symbol;Acc:MGI:2143702]	protein_coding			Enpp3		ENSG00000154269	ENPP3	5169	45.45	0.900812	0.426924	2.11001	0.0348577	0.468928
ENSMAUG00000001246	Tcerg1	17213720	17265119	101841438	transcription elongation regulator 1 [Source:NCBI gene;Acc:101841438]	protein_coding			Tcerg1	101841438	ENSG00000113649	TCERG1	10915	1636.99	0.177643	0.104242	1.70414	0.0883542	0.549731
ENSMAUG00000001248	Tasl	3396862	3465569	101827612	chromosome unknown CXorf21 homolog [Source:NCBI gene;Acc:101827612]	protein_coding			Tasl	101827612	ENSG00000120280	TASL	80231	55.0308	0.83655	0.352566	2.37274	0.0176565	0.37853
ENSMAUG00000001249	Dbndd2	3240	4713	101844532	dysbindin domain-containing protein 2-like [Source:NCBI gene;Acc:101844532]	protein_coding			Dbndd2	101844532	ENSG00000244274	DBNDD2	55861	431.955	-0.097451	0.146725	-0.664175	0.506578	0.778878
ENSMAUG00000001250	Bves	20287753	20319988	101840262	blood vessel epicardial substance [Source:NCBI gene;Acc:101840262]	protein_coding			Bves	101840262	ENSG00000112276	BVES	11149	53.7043	-0.210707	0.307718	-0.684743	0.493506	0.772275
ENSMAUG00000001251	Ssr1	15167014	15181701	101827729	signal sequence receptor subunit 1 [Source:NCBI gene;Acc:101827729]	protein_coding			Ssr1	101827729	ENSG00000124783	SSR1	6745	1610.36	0.172425	0.153322	1.12459	0.260762	0.64618
ENSMAUG00000001252	Odf2l	2796349	2822567		outer dense fiber of sperm tails 2-like [Source:MGI Symbol;Acc:MGI:1098600]	protein_coding			Odf2l		ENSG00000122417	ODF2L	57489	209.945	0.333651	0.208017	1.60396	0.108722	0.568991
ENSMAUG00000001253	Bdkrb2	10272460	10279141	101837939	bradykinin receptor B2 [Source:NCBI gene;Acc:101837939]	protein_coding			Bdkrb2	101837939	ENSG00000168398	BDKRB2	624	72.6916	-0.538135	0.275193	-1.95548	0.0505263	0.507338
ENSMAUG00000001254	Fam222b	9301958	9332821	101832556	family with sequence similarity 222 member B [Source:NCBI gene;Acc:101832556]	protein_coding			Fam222b	101832556	ENSG00000173065	FAM222B	55731	1027.6	-0.0502852	0.0755196	-0.665856	0.505503	0.77853
ENSMAUG00000001255	Knstrn	5133300	5147227	101825966	kinetochore localized astrin (SPAG5) binding protein [Source:NCBI gene;Acc:101825966]	protein_coding			Knstrn	101825966	ENSG00000128944	KNSTRN	90417	54.7125	-0.443373	0.355724	-1.2464	0.212619	0.621679
ENSMAUG00000001256	Steap2	2878016	2902042	101830730	STEAP2 metalloreductase [Source:NCBI gene;Acc:101830730]	protein_coding			Steap2	101830730	ENSG00000157214	STEAP2	261729	92.8383	0.00201691	0.23105	0.0087293	0.993035	0.997479
ENSMAUG00000001258	COL9A3	4967430	4998390			protein_coding					ENSG00000092758	COL9A3	1299	648.525	0.152166	0.294788	0.516187	0.605724	0.829087
ENSMAUG00000001259	Cebpzos	14294606	14299346	106021429	CEBPZ opposite strand [Source:NCBI gene;Acc:106021429]	protein_coding			Cebpzos	106021429	ENSG00000218739	CEBPZOS	100505876	550.241	0.0588004	0.185765	0.316531	0.7516	0.893923
ENSMAUG00000001261	Apbb1	397827	419132	101825033	amyloid beta precursor protein binding family B member 1 [Source:NCBI gene;Acc:101825033]	protein_coding			Apbb1	101825033	ENSG00000166313	APBB1	322	2440.54	-0.165433	0.174639	-0.947283	0.343495	0.691161
ENSMAUG00000001262	Icam5	9144204	9151823	101834387	intercellular adhesion molecule 5 [Source:NCBI gene;Acc:101834387]	protein_coding			Icam5	101834387	ENSG00000105376	ICAM5	7087	113.598	-0.270715	0.363137	-0.745489	0.455976	0.74813
ENSMAUG00000001264	Gas2l2	4163193	4170468	101832995	growth arrest specific 2 like 2 [Source:NCBI gene;Acc:101832995]	protein_coding			Gas2l2	101832995	ENSG00000270765	GAS2L2	246176	190.781	0.141692	0.330961	0.428122	0.668562	0.856146
ENSMAUG00000001265	Extl2	838423	858995	101830709	exostosin like glycosyltransferase 2 [Source:NCBI gene;Acc:101830709]	protein_coding			Extl2	101830709	ENSG00000162694	EXTL2	2135	898.078	0.130562	0.108096	1.20783	0.227111	0.626104
ENSMAUG00000001266	Dtwd2	10300854	10352340	101829784	DTW domain containing 2 [Source:NCBI gene;Acc:101829784]	protein_coding			Dtwd2	101829784	ENSG00000169570	DTWD2	285605	246.225	0.269909	0.114536	2.35655	0.0184458	0.382601
ENSMAUG00000001267	Zfp839	5040057	5051140	101829509	zinc finger protein 839 [Source:NCBI gene;Acc:101829509]	protein_coding			Zfp839	101829509	ENSG00000022976	ZNF839	55778	223.096	0.109878	0.175335	0.626678	0.53087	0.788718
ENSMAUG00000001268	Slamf1	10003720	10044244	101832383	signaling lymphocytic activation molecule family member 1 [Source:NCBI gene;Acc:101832383]	protein_coding			Slamf1	101832383	ENSG00000117090	SLAMF1	6504	46.326	-0.0555008	0.31848	-0.174268	0.861655	0.942515
ENSMAUG00000001270	Mmp13	5361155	5370419	101823919	matrix metallopeptidase 13 [Source:NCBI gene;Acc:101823919]	protein_coding			Mmp13	101823919	ENSG00000137745	MMP13	4322	30.0943	0.484752	0.513559	0.943908	0.345217	0.691591
ENSMAUG00000001271	H2AZ1	3636	4018			protein_coding					ENSG00000164032	H2AZ1	3015	122.492	-0.2685	0.177599	-1.51183	0.130577	0.58005
ENSMAUG00000001272	NOX4	2091661	2221541			protein_coding					ENSG00000086991	NOX4	50507	124.828	0.325239	0.468552	0.694137	0.487597	0.767944
ENSMAUG00000001273	Ankrd29	23092577	23139678	101837916	ankyrin repeat domain 29 [Source:NCBI gene;Acc:101837916]	protein_coding			Ankrd29	101837916	ENSG00000154065	ANKRD29	147463	766.14	0.563063	0.174652	3.22391	0.00126452	0.120007
ENSMAUG00000001274	Tmcc3	8028340	8091110	101833399	transmembrane and coiled-coil domain family 3 [Source:NCBI gene;Acc:101833399]	protein_coding			Tmcc3	101833399	ENSG00000057704	TMCC3	57458	561.079	0.68988	0.617601	1.11703	0.263981	0.649249
ENSMAUG00000001275	Gpr157	6372799	6389880	101827260	G protein-coupled receptor 157 [Source:NCBI gene;Acc:101827260]	protein_coding			Gpr157	101827260	ENSG00000180758	GPR157	80045	124.507	0.249769	0.22981	1.08685	0.277104	0.656936
ENSMAUG00000001276	Efnb2	2690515	2734337	101840568	ephrin B2 [Source:NCBI gene;Acc:101840568]	protein_coding			Efnb2	101840568	ENSG00000125266	EFNB2	1948	6654.77	-0.0345089	0.321747	-0.107255	0.914587	0.966631
ENSMAUG00000001277	Elovl5	10093597	10152937	101844560	ELOVL fatty acid elongase 5 [Source:NCBI gene;Acc:101844560]	protein_coding			Elovl5	101844560	ENSG00000012660	ELOVL5	60481	7981.21	0.126151	0.127988	0.985643	0.324308	0.681414
ENSMAUG00000001278	Rai1	16692217	16706451	101844093	retinoic acid induced 1 [Source:NCBI gene;Acc:101844093]	protein_coding			Rai1	101844093	ENSG00000108557	RAI1	10743	2409.72	-0.040503	0.106705	-0.379579	0.704258	0.873199
ENSMAUG00000001279	Wdr12	18517007	18536893	101844546	WD repeat domain 12 [Source:NCBI gene;Acc:101844546]	protein_coding			Wdr12	101844546	ENSG00000138442	WDR12	55759	761.12	-0.0940877	0.134141	-0.70141	0.483047	0.764324
ENSMAUG00000001281	Slc36a4	1657986	1693249	101827093	solute carrier family 36 member 4 [Source:NCBI gene;Acc:101827093]	protein_coding			Slc36a4	101827093	ENSG00000180773	SLC36A4	120103	1215.65	0.0689092	0.204751	0.33655	0.736456	0.886935
ENSMAUG00000001282	Tedc2	2840563	2845543	101838160	tubulin epsilon and delta complex 2 [Source:NCBI gene;Acc:101838160]	protein_coding			Tedc2	101838160	ENSG00000162062	TEDC2	80178	174.109	-0.0307193	0.192203	-0.159827	0.873017	0.948175
ENSMAUG00000001284	Rfesd	36360624	36372141	101840154	Rieske Fe-S domain containing [Source:NCBI gene;Acc:101840154]	protein_coding			Rfesd	101840154	ENSG00000175449	RFESD	317671	239.861	0.0465096	0.133224	0.349108	0.727008	0.883168
ENSMAUG00000001285	Phka2	10143090	10238174		phosphorylase kinase alpha 2 [Source:MGI Symbol;Acc:MGI:97577]	protein_coding			Phka2		ENSG00000044446	PHKA2	5256	547.311	0.131644	0.136956	0.961213	0.336445	0.687072
ENSMAUG00000001286	Ythdc1	10965940	10992790	101823001	YTH domain containing 1 [Source:NCBI gene;Acc:101823001]	protein_coding			Ythdc1	101823001	ENSG00000083896	YTHDC1	91746	2451.68	0.15583	0.102039	1.52716	0.126721	0.579471
ENSMAUG00000001288	Zfp169	4524085	4538786		zinc finger protein 169 [Source:MGI Symbol;Acc:MGI:1915161]	protein_coding			Zfp169		ENSG00000175787	ZNF169	169841	74.0328	0.565466	0.420911	1.34343	0.179132	0.611361
ENSMAUG00000001289	Zfyve9	10890569	10984294		zinc finger, FYVE domain containing 9 [Source:MGI Symbol;Acc:MGI:2652838]	protein_coding			Zfyve9		ENSG00000157077	ZFYVE9	9372	1129.98	0.181465	0.124033	1.46304	0.143456	0.59194
ENSMAUG00000001290	Ackr3	2417594	2429251	101838690	atypical chemokine receptor 3 [Source:NCBI gene;Acc:101838690]	protein_coding			Ackr3	101838690	ENSG00000144476	ACKR3	57007	1532.32	0.0718478	0.280054	0.25655	0.797526	0.912256
ENSMAUG00000001292	Naglu	20468538	20475913	101832884	N-acetyl-alpha-glucosaminidase [Source:NCBI gene;Acc:101832884]	protein_coding			Naglu	101832884	ENSG00000108784	NAGLU	4669	3122.46	-0.0458759	0.114806	-0.399596	0.689454	0.865495
ENSMAUG00000001294	Jade3	811368	878621	101829125	jade family PHD finger 3 [Source:NCBI gene;Acc:101829125]	protein_coding			Jade3	101829125	ENSG00000102221	JADE3	9767	342.827	0.128985	0.156415	0.824633	0.40958	0.725021
ENSMAUG00000001296	ERH	3295179	3304726	101823020	ERH mRNA splicing and mitosis factor [Source:NCBI gene;Acc:101823020]	protein_coding				101823020	ENSG00000100632	ERH	2079	2005.08	-0.0834717	0.134459	-0.620797	0.534733	0.791738
ENSMAUG00000001297	Entpd6	13649550	13668344	101832979	ectonucleoside triphosphate diphosphohydrolase 6 [Source:NCBI gene;Acc:101832979]	protein_coding			Entpd6	101832979	ENSG00000197586	ENTPD6	955	626.606	-0.182494	0.12572	-1.45159	0.146615	0.592664
ENSMAUG00000001298	KDM4C	1345705	1438584			protein_coding					ENSG00000107077	KDM4C	23081	216.429	0.513914	0.416071	1.23516	0.216771	0.621679
ENSMAUG00000001299	Vcpkmt	14629321	14636130	101836532	valosin containing protein lysine methyltransferase [Source:NCBI gene;Acc:101836532]	protein_coding			Vcpkmt	101836532	ENSG00000100483	VCPKMT	79609	550.521	-0.0528615	0.126454	-0.418031	0.675925	0.859428
ENSMAUG00000001300	Plcg1	2510951	2542040	101824564	phospholipase C gamma 1 [Source:NCBI gene;Acc:101824564]	protein_coding			Plcg1	101824564	ENSG00000124181	PLCG1	5335	6870.79	-0.160435	0.120578	-1.33054	0.183339	0.612769
ENSMAUG00000001301	Ppp4r3a	14534602	14579480	101827313	protein phosphatase 4 regulatory subunit 3A [Source:NCBI gene;Acc:101827313]	protein_coding			Ppp4r3a	101827313	ENSG00000100796	PPP4R3A	55671	3063.2	0.0406748	0.0628657	0.647011	0.517625	0.783023
ENSMAUG00000001302	Tas1r3	425213	428565	101835087	taste 1 receptor member 3 [Source:NCBI gene;Acc:101835087]	protein_coding			Tas1r3	101835087	ENSG00000169962	TAS1R3	83756	43.0008	-0.274136	0.322161	-0.85093	0.394808	0.71605
ENSMAUG00000001304	Gnat2	8668414	8677096	101831412	G protein subunit alpha transducin 2 [Source:NCBI gene;Acc:101831412]	protein_coding			Gnat2	101831412	ENSG00000134183	GNAT2	2780	4.74899	1.67512	0.769012	2.17827	0.0293859	0.450128
ENSMAUG00000001305	SCN7A	57431593	57432712			protein_coding					ENSG00000136546	SCN7A	6332	21.7997	0.562731	0.703376	0.800042	0.423686	0.732968
ENSMAUG00000001306	9930104L06Rik	2120780	2124807	101841226	chromosome unknown C1orf109 homolog [Source:NCBI gene;Acc:101841226]	protein_coding			9930104L06Rik	101841226	ENSG00000116922	C1orf109	54955	170.769	-0.201564	0.120255	-1.67613	0.0937119	0.559282
ENSMAUG00000001307	Mlc1	11049227	11067673	101831644	modulator of VRAC current 1 [Source:NCBI gene;Acc:101831644]	protein_coding			Mlc1	101831644	ENSG00000100427	MLC1	23209	20.1577	-1.31185	0.815273	-1.60909	0.107597	0.567727
ENSMAUG00000001308	Med13l	7060728	7262003	101839142	mediator complex subunit 13L [Source:NCBI gene;Acc:101839142]	protein_coding			Med13l	101839142	ENSG00000123066	MED13L	23389	2308.63	0.344042	0.271004	1.26951	0.204258	0.620449
ENSMAUG00000001309	Prkcg	3491484	3517531		protein kinase C, gamma [Source:MGI Symbol;Acc:MGI:97597]	protein_coding			Prkcg		ENSG00000126583	PRKCG	5582	76.3007	-0.261799	0.39827	-0.65734	0.510962	0.78018
ENSMAUG00000001312	RPL29	3890669	3891131			protein_coding					ENSG00000162244	RPL29	6159	10.8978	0.407401	0.435531	0.935411	0.349576	0.69344
ENSMAUG00000001313	Pkd1l3	2296867	2362100		polycystic kidney disease 1 like 3 [Source:MGI Symbol;Acc:MGI:2664670]	protein_coding			Pkd1l3		ENSG00000277481	PKD1L3	342372	16.6061	-0.493549	0.397306	-1.24224	0.214148	0.621679
ENSMAUG00000001315	Disc1	1496786	1701082		disrupted in schizophrenia 1 [Source:MGI Symbol;Acc:MGI:2447658]	protein_coding			Disc1		ENSG00000162946	DISC1	27185	43.9862	0.173823	0.454376	0.382554	0.702051	0.872012
ENSMAUG00000001316	C2cd4a	3943781	3944803	101836456	C2 calcium-dependent domain-containing protein 4A [Source:NCBI gene;Acc:101836456]	protein_coding								35.089	-0.2287	0.272016	-0.84076	0.400482	0.718738
ENSMAUG00000001317	RTN4	1397082	1445025	101843855	reticulon 4 [Source:NCBI gene;Acc:101843855]	protein_coding				101843855	ENSG00000115310	RTN4	57142	11604	-0.122426	0.0715265	-1.71161	0.086968	0.548746
ENSMAUG00000001319	Pik3cd	6819950	6843598	101828739	phosphatidylinositol-4,5-bisphosphate 3-kinase catalytic subunit delta [Source:NCBI gene;Acc:101828739]	protein_coding			Pik3cd	101828739	ENSG00000171608	PIK3CD	5293	3110.99	0.0986909	0.220811	0.446947	0.654913	0.849634
ENSMAUG00000001320	Ndp	1441755	1465156	101825342	norrin cystine knot growth factor NDP [Source:NCBI gene;Acc:101825342]	protein_coding			Ndp	101825342	ENSG00000124479	NDP	4693	87.2974	0.27726	0.313718	0.883786	0.376812	0.708539
ENSMAUG00000001322	Tollip	57079101	57108471	101832676	toll interacting protein [Source:NCBI gene;Acc:101832676]	protein_coding			Tollip	101832676	ENSG00000078902	TOLLIP	54472	6709.98	0.0798718	0.0661761	1.20696	0.227448	0.626665
ENSMAUG00000001323	Traf5	3005418	3024274		TNF receptor-associated factor 5 [Source:MGI Symbol;Acc:MGI:107548]	protein_coding			Traf5		ENSG00000082512	TRAF5	7188	484.294	0.172223	0.21335	0.807233	0.419532	0.731285
ENSMAUG00000001324	Tbcc	11147288	11148310	101826964	tubulin folding cofactor C [Source:NCBI gene;Acc:101826964]	protein_coding			Tbcc	101826964	ENSG00000124659	TBCC	6903	1828.93	-0.27226	0.135446	-2.0101	0.0444209	0.484742
ENSMAUG00000001325	Znhit1	7091118	7097622		zinc finger, HIT domain containing 1 [Source:MGI Symbol;Acc:MGI:1917353]	protein_coding			Znhit1		ENSG00000106400	ZNHIT1	10467	1747.58	-0.208657	0.172953	-1.20644	0.227649	0.626867
ENSMAUG00000001326	Fbh1	4616130	4652050		F-box DNA helicase 1 [Source:MGI Symbol;Acc:MGI:1354699]	protein_coding			Fbh1		ENSG00000134452	FBH1	84893	1986.21	0.028534	0.0778404	0.36657	0.71394	0.876998
ENSMAUG00000001327	Dnajc18	888421	921230	101834515	DnaJ heat shock protein family (Hsp40) member C18 [Source:NCBI gene;Acc:101834515]	protein_coding			Dnajc18	101834515	ENSG00000170464	DNAJC18	202052	286.186	0.211104	0.266747	0.7914	0.428711	0.736119
ENSMAUG00000001328	Cdh4	10824122	10963975	101839572	cadherin 4 [Source:NCBI gene;Acc:101839572]	protein_coding			Cdh4	101839572	ENSG00000179242	CDH4	1002	124.784	0.270853	0.345956	0.782912	0.433679	0.738444
ENSMAUG00000001330	MOSPD2	5583731	5613303			protein_coding					ENSG00000130150	MOSPD2	158747	80.2106	0.876425	0.61918	1.41546	0.156934	0.601954
ENSMAUG00000001331	Ide	21602405	21692522	101837906	insulin degrading enzyme [Source:NCBI gene;Acc:101837906]	protein_coding			Ide	101837906	ENSG00000119912	IDE	3416	1674.02	0.067696	0.101155	0.669232	0.503347	0.777889
ENSMAUG00000001332	PCED1B	545	1843	101825989	PC-esterase domain-containing protein 1B [Source:NCBI gene;Acc:101825989]	protein_coding				101825989	ENSG00000179715	PCED1B	91523	1351.58	-0.18893	0.136332	-1.38581	0.165805	0.606715
ENSMAUG00000001334	Srgap2	272190	487412	101838424	SLIT-ROBO Rho GTPase activating protein 2 [Source:NCBI gene;Acc:101838424]	protein_coding								5865.35	0.0831431	0.103436	0.803816	0.421503	0.731946
ENSMAUG00000001335	Ushbp1	1039374	1048573		USH1 protein network component harmonin binding protein 1 [Source:MGI Symbol;Acc:MGI:1922920]	protein_coding			Ushbp1		ENSG00000130307	USHBP1	83878	5881	-0.507245	0.231969	-2.18669	0.028765	0.446744
ENSMAUG00000001337	Mast1	704649	728687	101835652	microtubule associated serine/threonine kinase 1 [Source:NCBI gene;Acc:101835652]	protein_coding			Mast1	101835652	ENSG00000105613	MAST1	22983	425.481	-0.214846	0.309013	-0.695266	0.486888	0.767563
ENSMAUG00000001338	Il17re	10017783	10030730		interleukin 17 receptor E [Source:MGI Symbol;Acc:MGI:1889371]	protein_coding			Il17re		ENSG00000163701	IL17RE	132014	2611.38	-0.0813401	0.216992	-0.374853	0.70777	0.874901
ENSMAUG00000001339	Gmeb2	12387325	12421752	101825323	glucocorticoid modulatory element binding protein 2 [Source:NCBI gene;Acc:101825323]	protein_coding			Gmeb2	101825323	ENSG00000101216	GMEB2	26205	1351.65	0.103479	0.0727181	1.42302	0.154731	0.599651
ENSMAUG00000001342	0610040J01Rik	5679795	5682942	101831670	chromosome unknown C4orf19 homolog [Source:NCBI gene;Acc:101831670]	protein_coding			0610040J01Rik	101831670	ENSG00000154274	C4orf19	55286	1410.03	0.0799127	0.139886	0.571271	0.567816	0.809694
ENSMAUG00000001343	Sec16b	6462528	6500043	101838479	SEC16 homolog B, endoplasmic reticulum export factor [Source:NCBI gene;Acc:101838479]	protein_coding								9.23672	-0.00761119	0.579119	-0.0131427	0.989514	0.996219
ENSMAUG00000001344	Cyld	6013638	6067338	101837449	CYLD lysine 63 deubiquitinase [Source:NCBI gene;Acc:101837449]	protein_coding			Cyld	101837449	ENSG00000083799	CYLD	1540	2599.53	0.279644	0.100279	2.78867	0.00529248	0.239537
ENSMAUG00000001345	MNDA	8318941	8327567	101841909	myeloid cell nuclear differentiation antigen [Source:NCBI gene;Acc:101841909]	protein_coding				101841909	ENSG00000163563	MNDA	4332	3150.3	1.20729	0.321104	3.7598	0.000170051	0.0297791
ENSMAUG00000001346	Kif11	21538222	21585444		kinesin family member 11 [Source:MGI Symbol;Acc:MGI:1098231]	protein_coding			Kif11		ENSG00000138160	KIF11	3832	163.628	0.234444	0.318098	0.737019	0.461111	0.75019
ENSMAUG00000001347	Cdc16	4975265	4999812	101838795	cell division cycle 16 [Source:NCBI gene;Acc:101838795]	protein_coding			Cdc16	101838795	ENSG00000130177	CDC16	8881	2899.61	-0.042612	0.0720957	-0.591047	0.554489	0.803102
ENSMAUG00000001348	Trim2	764495	809688	101837807	tripartite motif containing 2 [Source:NCBI gene;Acc:101837807]	protein_coding			Trim2	101837807	ENSG00000109654	TRIM2	23321	983.062	0.616277	0.163009	3.78062	0.000156438	0.0280805
ENSMAUG00000001349	CFAP74	833377	835879			protein_coding					ENSG00000142609	CFAP74	85452	298.264	-0.0227627	0.418706	-0.0543643	0.956645	0.983063
ENSMAUG00000001350	Gabre	45256	62335	101823072	gamma-aminobutyric acid type A receptor subunit epsilon [Source:NCBI gene;Acc:101823072]	protein_coding			Gabre	101823072	ENSG00000102287	GABRE	2564	55.3866	0.333135	0.322085	1.03431	0.300993	0.668472
ENSMAUG00000001351	Nhlh1	9799032	9799433	101831868	nescient helix-loop-helix 1 [Source:NCBI gene;Acc:101831868]	protein_coding			Nhlh1	101831868	ENSG00000171786	NHLH1	4807	12.3992	0.648319	0.539253	1.20225	0.229265	0.628086
ENSMAUG00000001352	Aplnr	38315863	38316996	101841505	apelin receptor [Source:NCBI gene;Acc:101841505]	protein_coding			Aplnr	101841505	ENSG00000134817	APLNR	187	4124.59	-0.246007	0.347554	-0.707824	0.479054	0.762073
ENSMAUG00000001353	Ankrd45	10075826	10098305	101842607	ankyrin repeat domain 45 [Source:NCBI gene;Acc:101842607]	protein_coding								32.5626	0.281798	0.369014	0.763652	0.445074	0.742532
ENSMAUG00000001356	Stoml2	7275279	7278894	101835790	stomatin like 2 [Source:NCBI gene;Acc:101835790]	protein_coding			Stoml2	101835790	ENSG00000165283	STOML2	30968	2263.43	-0.105701	0.121108	-0.872783	0.382781	0.711933
ENSMAUG00000001357	Rps6ka6	2726465	2832145		ribosomal protein S6 kinase polypeptide 6 [Source:MGI Symbol;Acc:MGI:1914321]	protein_coding			Rps6ka6		ENSG00000072133	RPS6KA6	27330	29.0841	0.596512	0.382704	1.55868	0.119072	0.574587
ENSMAUG00000001358	Rnpc3	1512186	1539770	101833895	RNA binding region (RNP1, RRM) containing 3 [Source:NCBI gene;Acc:101833895]	protein_coding			Rnpc3	101833895	ENSG00000185946	RNPC3	55599	740.117	0.246331	0.143807	1.71293	0.0867258	0.548746
ENSMAUG00000001360	IDH1	13550045	13560566			protein_coding					ENSG00000138413	IDH1	3417	3077.78	0.251348	0.1589	1.5818	0.113696	0.569642
ENSMAUG00000001361	Rilpl1	4494627	4516709	101835348	Rab interacting lysosomal protein like 1 [Source:NCBI gene;Acc:101835348]	protein_coding			Rilpl1	101835348	ENSG00000188026	RILPL1	353116	2217.38	-0.250895	0.141343	-1.77507	0.0758858	0.536916
ENSMAUG00000001362	Cse1l	699323	740573	101840658	chromosome segregation 1 like [Source:NCBI gene;Acc:101840658]	protein_coding			Cse1l	101840658	ENSG00000124207	CSE1L	1434	1590.02	-0.043462	0.0648804	-0.66988	0.502935	0.777526
ENSMAUG00000001363	CLEC2D	3860432	3903086			protein_coding					ENSG00000069493	CLEC2D	29121	235.639	0.126695	0.169752	0.746354	0.455453	0.747782
ENSMAUG00000001364	Adk	2985034	3381617	101828844	adenosine kinase [Source:NCBI gene;Acc:101828844]	protein_coding			Adk	101828844	ENSG00000156110	ADK	132	2710.16	-0.134082	0.120246	-1.11506	0.264824	0.65011
ENSMAUG00000001365	Rpl10l	1854	2498	101842773	60S ribosomal protein L10-like [Source:NCBI gene;Acc:101842773]	protein_coding			Rpl10l	101842773	ENSG00000165496	RPL10L	140801	6.74212	0.234505	0.583534	0.401871	0.687779	0.865044
ENSMAUG00000001366	Ing3	2956515	2984607	101829723	inhibitor of growth family member 3 [Source:NCBI gene;Acc:101829723]	protein_coding			Ing3	101829723	ENSG00000071243	ING3	54556	754.297	0.101891	0.154125	0.661093	0.508553	0.779414
ENSMAUG00000001368	Pwwp2b	59521716	59538412	101827542	PWWP domain containing 2B [Source:NCBI gene;Acc:101827542]	protein_coding			Pwwp2b	101827542	ENSG00000171813	PWWP2B	170394	2323.11	-0.151339	0.176162	-0.85909	0.390291	0.71483
ENSMAUG00000001370	Siah1a	8017112	8038954		siah E3 ubiquitin protein ligase 1B [Source:MGI Symbol;Acc:MGI:108063]	protein_coding			Siah1b		ENSG00000196470	SIAH1	6477	1028.88	0.00124762	0.11994	0.0104021	0.991701	0.997291
ENSMAUG00000001371	Rgl1	1652970	1794938	101827666	ral guanine nucleotide dissociation stimulator like 1 [Source:NCBI gene;Acc:101827666]	protein_coding			Rgl1	101827666	ENSG00000143344	RGL1	23179	3209.3	0.100677	0.164571	0.611755	0.5407	0.794774
ENSMAUG00000001376	Zbtb17	5577323	5582718	101842097	zinc finger and BTB domain containing 17 [Source:NCBI gene;Acc:101842097]	protein_coding			Zbtb17	101842097	ENSG00000116809	ZBTB17	7709	2132.64	-0.173903	0.155007	-1.1219	0.261904	0.646882
ENSMAUG00000001377	C8b	14729279	14770662	101822474	complement C8 beta chain [Source:NCBI gene;Acc:101822474]	protein_coding			C8b	101822474	ENSG00000021852	C8B	732	9.0878	-0.408542	0.64036	-0.637989	0.523481	0.785512
ENSMAUG00000001378	Id1	517112	518230	101834420	inhibitor of DNA binding 1, HLH protein [Source:NCBI gene;Acc:101834420]	protein_coding			Id1	101834420	ENSG00000125968	ID1	3397	2736.49	-0.110434	0.232719	-0.474539	0.635116	0.84152
ENSMAUG00000001379	Krt19	241445	246057	101826766	keratin 19 [Source:NCBI gene;Acc:101826766]	protein_coding			Krt19	101826766	ENSG00000171345	KRT19	3880	35880.4	-0.357631	0.236529	-1.512	0.130535	0.58005
ENSMAUG00000001381	D3Ertd751e	6782833	6791531	101829785	chromosome unknown C4orf33 homolog [Source:NCBI gene;Acc:101829785]	protein_coding			D3Ertd751e	101829785	ENSG00000151470	C4orf33	132321	60.5302	0.692851	0.27334	2.53476	0.0112524	0.324724
ENSMAUG00000001382	Retreg2	3837177	3843523	101839461	reticulophagy regulator family member 2 [Source:NCBI gene;Acc:101839461]	protein_coding			Retreg2	101839461	ENSG00000144567	RETREG2	79137	4742.8	-0.130525	0.0814852	-1.60182	0.109195	0.568991
ENSMAUG00000001383	Lct	3388126	3426942		lactase [Source:MGI Symbol;Acc:MGI:104576]	protein_coding			Lct		ENSG00000115850	LCT	3938	34.4516	-0.346836	0.241638	-1.43536	0.151186	0.596511
ENSMAUG00000001385	Larp1	18992297	19040424	101835223	La ribonucleoprotein 1, translational regulator [Source:NCBI gene;Acc:101835223]	protein_coding			Larp1	101835223	ENSG00000155506	LARP1	23367	4043.99	0.176454	0.123074	1.43372	0.151652	0.596949
ENSMAUG00000001388	SPCS3	617	1159	101835487	signal peptidase complex subunit 3 [Source:NCBI gene;Acc:101835487]	protein_coding				101835487	ENSG00000129128	SPCS3	60559	18.4211	1.39432	0.524097	2.66043	0.00780405	0.28704
ENSMAUG00000001389	Thsd4	11680512	11850904	101839389	thrombospondin type 1 domain containing 4 [Source:NCBI gene;Acc:101839389]	protein_coding			Thsd4	101839389	ENSG00000187720	THSD4	79875	174.634	0.608098	0.510625	1.19089	0.233697	0.630022
ENSMAUG00000001391	ODC1	535	1897			protein_coding					ENSG00000115758	ODC1	4953	371.263	-0.0624886	0.118676	-0.526547	0.598509	0.825047
ENSMAUG00000001392	Crygn	406359	413944	101832769	crystallin gamma N [Source:NCBI gene;Acc:101832769]	protein_coding			Crygn	101832769	ENSG00000127377	CRYGN	155051	6.09404	-0.877584	0.717287	-1.22348	0.22115	0.624682
ENSMAUG00000001393	Plbd2	8894032	8911124	101840475	phospholipase B domain containing 2 [Source:NCBI gene;Acc:101840475]	protein_coding			Plbd2	101840475	ENSG00000151176	PLBD2	196463	8397.9	-0.171686	0.127586	-1.34565	0.178415	0.611361
ENSMAUG00000001395	CYCS	42271876	42272175			protein_coding					ENSG00000172115	CYCS	54205	222.415	0.117523	0.181127	0.648844	0.516439	0.782939
ENSMAUG00000001396	PCED1B	5228	6526	101826248	PC-esterase domain-containing protein 1B [Source:NCBI gene;Acc:101826248]	protein_coding				101826248	ENSG00000179715	PCED1B	91523	1351.58	-0.189247	0.136377	-1.38767	0.165236	0.606594
ENSMAUG00000001398	Dhps	859334	863007	101840335	deoxyhypusine synthase [Source:NCBI gene;Acc:101840335]	protein_coding								1303.88	-0.0274054	0.0752433	-0.364224	0.715691	0.877537
ENSMAUG00000001400	Zfyve1	359142	418049	101839652	zinc finger FYVE-type containing 1 [Source:NCBI gene;Acc:101839652]	protein_coding			Zfyve1	101839652	ENSG00000165861	ZFYVE1	53349	2063.79	-0.17877	0.0628839	-2.84285	0.00447116	0.224462
ENSMAUG00000001401	Med22	172411	191734	101826674	mediator complex subunit 22 [Source:NCBI gene;Acc:101826674]	protein_coding			Med22	101826674	ENSG00000148297	MED22	6837	1074.6	-0.186966	0.102961	-1.81589	0.0693875	0.528165
ENSMAUG00000001402	6430548M08Rik	709	8741	101837770	uncharacterized protein KIAA0513 [Source:NCBI gene;Acc:101837770]	protein_coding			6430548M08Rik	101837770	ENSG00000135709	KIAA0513	9764	451.811	-0.00996917	0.277476	-0.035928	0.97134	0.988817
ENSMAUG00000001404	Csf3r	3218616	3227411		colony stimulating factor 3 receptor (granulocyte) [Source:MGI Symbol;Acc:MGI:1339755]	protein_coding			Csf3r		ENSG00000119535	CSF3R	1441	2006.78	0.125708	0.409055	0.307313	0.758605	0.896816
ENSMAUG00000001405	Lyst	13663042	13822646		lysosomal trafficking regulator [Source:MGI Symbol;Acc:MGI:107448]	protein_coding			Lyst		ENSG00000143669	LYST	1130	919.749	0.626849	0.42257	1.48342	0.137963	0.58708
ENSMAUG00000001406	Arap3	21701728	21725941	101826958	ArfGAP with RhoGAP domain, ankyrin repeat and PH domain 3 [Source:NCBI gene;Acc:101826958]	protein_coding			Arap3	101826958	ENSG00000120318	ARAP3	64411	6561.95	-0.332627	0.207587	-1.60235	0.109078	0.568991
ENSMAUG00000001407	Fam50b	18417823	18418830	101832426	family with sequence similarity 50 member B [Source:NCBI gene;Acc:101832426]	protein_coding			Fam50b	101832426	ENSG00000145945	FAM50B	26240	5.03904	1.53907	0.796631	1.93197	0.053363	0.50972
ENSMAUG00000001409	Maml3	3312961	3757293	101827343	mastermind like transcriptional coactivator 3 [Source:NCBI gene;Acc:101827343]	protein_coding			Maml3	101827343	ENSG00000196782	MAML3	55534	326.811	-0.0954586	0.30822	-0.309709	0.756782	0.896317
ENSMAUG00000001410	Pikfyve	13435823	13537916	101835492	phosphoinositide kinase, FYVE-type zinc finger containing [Source:NCBI gene;Acc:101835492]	protein_coding			Pikfyve	101835492	ENSG00000115020	PIKFYVE	200576	804.924	0.410456	0.216122	1.89919	0.0575396	0.514592
ENSMAUG00000001411	Qrich1	4577162	4614715		glutamine-rich 1 [Source:MGI Symbol;Acc:MGI:1916482]	protein_coding			Qrich1		ENSG00000198218	QRICH1	54870	2232.92	0.0417023	0.0572438	0.728504	0.466305	0.754853
ENSMAUG00000001412	Cbfa2t2	3137144	3242246	101825275	CBFA2/RUNX1 partner transcriptional co-repressor 2 [Source:NCBI gene;Acc:101825275]	protein_coding			Cbfa2t2	101825275	ENSG00000078699	CBFA2T2	9139	1685.93	0.136165	0.0867157	1.57024	0.116359	0.57294
ENSMAUG00000001413	RPLP1	46757947	46758291			protein_coding					ENSG00000137818	RPLP1	6176	118.916	-0.150338	0.239303	-0.628233	0.529851	0.788718
ENSMAUG00000001414	GAPDH	7119960	7120501			protein_coding					ENSG00000111640	GAPDH	2597	1142.63	-0.167942	0.18752	-0.895592	0.370471	0.703995
ENSMAUG00000001415	Kpna4	906746	941451	101843446	karyopherin subunit alpha 4 [Source:NCBI gene;Acc:101843446]	protein_coding			Kpna4	101843446	ENSG00000186432	KPNA4	3840	4735.67	0.113904	0.115779	0.983807	0.32521	0.682342
ENSMAUG00000001416	Mapkap1	1124895	1244862	101822417	MAPK associated protein 1 [Source:NCBI gene;Acc:101822417]	protein_coding			Mapkap1	101822417	ENSG00000119487	MAPKAP1	79109	2479.23	-0.058616	0.0599869	-0.977146	0.328497	0.683762
ENSMAUG00000001418	Bcl2l13	2776546	2818450	101828776	BCL2 like 13 [Source:NCBI gene;Acc:101828776]	protein_coding			Bcl2l13	101828776	ENSG00000099968	BCL2L13	23786	2029.02	0.167793	0.0658772	2.54705	0.0108637	0.317075
ENSMAUG00000001419	FOXL2	1837	2955	101827829	forkhead box L2 [Source:NCBI gene;Acc:101827829]	protein_coding				101827829	ENSG00000183770	FOXL2	668	18.3857	-0.557305	0.420209	-1.32626	0.184755	0.613261
ENSMAUG00000001421	Anxa10	5948832	6008130		annexin A10 [Source:MGI Symbol;Acc:MGI:1347090]	protein_coding			Anxa10		ENSG00000109511	ANXA10	11199	2.90816	1.16343	1.08881	1.06854	0.285279	0.66051
ENSMAUG00000001422	Slc35b1	7757340	7763697	101824799	solute carrier family 35 member B1 [Source:NCBI gene;Acc:101824799]	protein_coding			Slc35b1	101824799	ENSG00000121073	SLC35B1	10237	3073.53	-0.132795	0.0766066	-1.73346	0.0830131	0.543446
ENSMAUG00000001423	Izumo2	2149745	2162103	101832675	IZUMO family member 2 [Source:NCBI gene;Acc:101832675]	protein_coding			Izumo2	101832675	ENSG00000161652	IZUMO2	126123	9.73304	0.448671	0.512484	0.875482	0.381312	0.711279
ENSMAUG00000001426	Higd2a	772	1738	101822826	HIG1 hypoxia inducible domain family member 2A [Source:NCBI gene;Acc:101822826]	protein_coding								1561.93	-0.206439	0.118256	-1.74569	0.0808645	0.540382
ENSMAUG00000001430	Ptpn20	3989199	4034421	101842269	protein tyrosine phosphatase non-receptor type 20 [Source:NCBI gene;Acc:101842269]	protein_coding			Ptpn20	101842269	ENSG00000204179	PTPN20	26095	4.95004	1.79704	1.04244	1.72387	0.0847309	0.546323
ENSMAUG00000001433	Vtn	8932511	8935714	101826377	vitronectin [Source:NCBI gene;Acc:101826377]	protein_coding								2233.91	-0.420765	0.331029	-1.27108	0.2037	0.620449
ENSMAUG00000001434	Sox4	23427686	23429005	101841515	SRY-box transcription factor 4 [Source:NCBI gene;Acc:101841515]	protein_coding			Sox4	101841515	ENSG00000124766	SOX4	6659	886.701	0.0537531	0.201611	0.266618	0.789763	0.910189
ENSMAUG00000001436	Psmd13	58061663	58071448	101828230	proteasome 26S subunit, non-ATPase 13 [Source:NCBI gene;Acc:101828230]	protein_coding			Psmd13	101828230	ENSG00000185627	PSMD13	5719	4050.53	-0.170093	0.135951	-1.25114	0.210884	0.621679
ENSMAUG00000001438	Mfsd14b	9785493	9832540	101826638	major facilitator superfamily domain containing 14B [Source:NCBI gene;Acc:101826638]	protein_coding			Mfsd14b	101826638	ENSG00000148110	MFSD14B	84641	2871.03	0.205781	0.16275	1.26439	0.206089	0.621277
ENSMAUG00000001439	SERPINB9	19308878	19312867			protein_coding					ENSG00000170542	SERPINB9	5272	72.5671	-0.261258	0.455644	-0.573381	0.566387	0.808967
ENSMAUG00000001442	Xcl1	13599683	13603777	101830061	X-C motif chemokine ligand 1 [Source:NCBI gene;Acc:101830061]	protein_coding								139.864	-0.229156	0.402604	-0.569185	0.56923	0.810351
ENSMAUG00000001443	Gtf3c2	6001652	6024704	101822754	general transcription factor IIIC subunit 2 [Source:NCBI gene;Acc:101822754]	protein_coding				101822754	ENSG00000115207	GTF3C2	2976	3917.46	0.0655564	0.075984	0.862766	0.388266	0.714427
ENSMAUG00000001444	Ccdc32	4937673	4948921	101840497	coiled-coil domain containing 32 [Source:NCBI gene;Acc:101840497]	protein_coding			Ccdc32	101840497	ENSG00000128891	CCDC32	90416	1558.8	-0.0831693	0.112841	-0.737046	0.461095	0.75019
ENSMAUG00000001445	Arpc2	4613229	4642511	101822925	actin related protein 2/3 complex subunit 2 [Source:NCBI gene;Acc:101822925]	protein_coding			Arpc2	101822925	ENSG00000163466	ARPC2	10109	14413.7	-0.0429827	0.0935136	-0.459641	0.645774	0.846155
ENSMAUG00000001449	TMEM131	8179726	8250115	101825068	transmembrane protein 131 [Source:NCBI gene;Acc:101825068]	protein_coding				101825068	ENSG00000075568	TMEM131	23505	1035.54	0.363487	0.319804	1.13659	0.255708	0.642985
ENSMAUG00000001453	Rabepk	1386053	1402698	101823142	Rab9 effector protein with kelch motifs [Source:NCBI gene;Acc:101823142]	protein_coding			Rabepk	101823142	ENSG00000136933	RABEPK	10244	816.953	-0.166019	0.162496	-1.02168	0.30693	0.672698
ENSMAUG00000001454	POLR3C	1729090	1744528	101840856	RNA polymerase III subunit C [Source:NCBI gene;Acc:101840856]	protein_coding				101840856	ENSG00000186141	POLR3C	10623	771.153	-0.115451	0.0632867	-1.82425	0.0681146	0.526287
ENSMAUG00000001456	Mepce	7829745	7834596	101836226	methylphosphate capping enzyme [Source:NCBI gene;Acc:101836226]	protein_coding			Mepce	101836226	ENSG00000146834	MEPCE	56257	3995.84	-0.306031	0.110105	-2.77945	0.00544515	0.239537
ENSMAUG00000001460	Prr12	1798183	1822687	101826410	proline rich 12 [Source:NCBI gene;Acc:101826410]	protein_coding			Prr12	101826410	ENSG00000126464	PRR12	57479	3695.94	-0.183313	0.121069	-1.51411	0.129997	0.58005
ENSMAUG00000001464	Sox13	738244	785575	101843053	SRY-box transcription factor 13 [Source:NCBI gene;Acc:101843053]	protein_coding			Sox13	101843053	ENSG00000143842	SOX13	9580	7885.68	-0.335352	0.166234	-2.01735	0.0436586	0.480479
ENSMAUG00000001465	Chrna4	12160537	12181733	101823556	cholinergic receptor nicotinic alpha 4 subunit [Source:NCBI gene;Acc:101823556]	protein_coding			Chrna4	101823556	ENSG00000101204	CHRNA4	1137	3.60184	-0.227383	1.01828	-0.2233	0.823302	0.925212
ENSMAUG00000001467	Lca5l	1927492	1939267		Leber congenital amaurosis 5-like [Source:MGI Symbol;Acc:MGI:3041157]	protein_coding			Lca5l		ENSG00000157578	LCA5L	150082	66.3727	0.570068	0.270039	2.11106	0.0347674	0.468928
ENSMAUG00000001468	Mettl23	4968756	4975592	101831566	methyltransferase like 23 [Source:NCBI gene;Acc:101831566]	protein_coding			Mettl23	101831566	ENSG00000181038	METTL23	124512	969.222	-0.216376	0.126857	-1.70566	0.0880708	0.549731
ENSMAUG00000001469	Chp1	4352049	4384574	101835895	calcineurin like EF-hand protein 1 [Source:NCBI gene;Acc:101835895]	protein_coding			Chp1	101835895	ENSG00000187446	CHP1	11261	7530.4	0.0928045	0.0961874	0.964829	0.33463	0.687072
ENSMAUG00000001470	Rskr	9152002	9154967	101827341	ribosomal protein S6 kinase related [Source:NCBI gene;Acc:101827341]	protein_coding			Rskr	101827341	ENSG00000167524	RSKR	124923	85.9972	-0.101337	0.244552	-0.414379	0.678597	0.861526
ENSMAUG00000001471	Tmem86b	1163163	1165951	101829923	transmembrane protein 86B [Source:NCBI gene;Acc:101829923]	protein_coding			Tmem86b	101829923	ENSG00000180089	TMEM86B	255043	671.733	-0.157002	0.272249	-0.576684	0.564153	0.80813
ENSMAUG00000001472	C3orf38	28387811	28388857	101827715	uncharacterized protein C3orf38 homolog [Source:NCBI gene;Acc:101827715]	protein_coding				101827715	ENSG00000179021	C3orf38	285237	757.546	-0.0949274	0.109705	-0.865298	0.386875	0.713628
ENSMAUG00000001474	Fbxl12	5644	6465	101831560	F-box and leucine rich repeat protein 12 [Source:NCBI gene;Acc:101831560]	protein_coding			Fbxl12	101831560	ENSG00000127452	FBXL12	54850	830.401	-0.0881878	0.161122	-0.547335	0.584149	0.818053
ENSMAUG00000001475	Ces1e	1505473	1531574	101831953	carboxylesterase 1E [Source:NCBI gene;Acc:101831953]	protein_coding								332.884	-0.196882	0.17693	-1.11277	0.265809	0.65011
ENSMAUG00000001476	Gdi1	228011	235443	101826762	GDP dissociation inhibitor 1 [Source:NCBI gene;Acc:101826762]	protein_coding			Gdi1	101826762	ENSG00000203879	GDI1	2664	8233.61	-0.0071934	0.0685142	-0.104992	0.916383	0.967347
ENSMAUG00000001478	Kcng4	12612393	12623285	101835686	potassium voltage-gated channel modifier subfamily G member 4 [Source:NCBI gene;Acc:101835686]	protein_coding			Kcng4	101835686	ENSG00000168418	KCNG4	93107	17.3216	0.173052	0.586148	0.295236	0.767814	0.900896
ENSMAUG00000001481	A430005L14Rik	2408822	2411189	101826203	chromosome unknown C1orf174 homolog [Source:NCBI gene;Acc:101826203]	protein_coding			A430005L14Rik	101826203	ENSG00000198912	C1orf174	339448	1186.67	-0.179951	0.136474	-1.31857	0.187313	0.614558
ENSMAUG00000001482	Pus1	2409466	2418934	101844708	pseudouridine synthase 1 [Source:NCBI gene;Acc:101844708]	protein_coding			Pus1	101844708	ENSG00000177192	PUS1	80324	1023.99	-0.130733	0.143815	-0.909039	0.36333	0.699664
ENSMAUG00000001486	PTPRM	797252	822169			protein_coding					ENSG00000173482	PTPRM	5797	4044.03	-0.206279	0.167819	-1.22917	0.219008	0.622751
ENSMAUG00000001488	Lmf2	11408617	11412950	101835656	lipase maturation factor 2 [Source:NCBI gene;Acc:101835656]	protein_coding			Lmf2	101835656	ENSG00000100258	LMF2	91289	4753.46	-0.267357	0.13877	-1.92662	0.054027	0.510218
ENSMAUG00000001489	Bpifb3	1737379	1751920	101839785	BPI fold containing family B member 3 [Source:NCBI gene;Acc:101839785]	protein_coding			Bpifb3	101839785	ENSG00000186190	BPIFB3	359710	48.8035	-6.13976	2.43295	-2.52358	0.0116166	0.327356
ENSMAUG00000001490	Ap3b1	19038505	19235701	101825020	adaptor related protein complex 3 subunit beta 1 [Source:NCBI gene;Acc:101825020]	protein_coding			Ap3b1	101825020	ENSG00000132842	AP3B1	8546	3213.42	0.0877828	0.101556	0.864374	0.387382	0.714085
ENSMAUG00000001491	Rab19	1485577	1502810	101842571	RAB19, member RAS oncogene family [Source:NCBI gene;Acc:101842571]	protein_coding			Rab19	101842571	ENSG00000146955	RAB19	401409	138.229	0.459369	0.174313	2.63531	0.00840616	0.291439
ENSMAUG00000001493	GLMP	508	3842	101828170	glycosylated lysosomal membrane protein [Source:NCBI gene;Acc:101828170]	protein_coding				101828170	ENSG00000198715	GLMP	112770	2925.13	-0.149384	0.161668	-0.924017	0.355477	0.695908
ENSMAUG00000001495	Irx1	37202193	37207671	101834152	iroquois homeobox 1 [Source:NCBI gene;Acc:101834152]	protein_coding			Irx1	101834152	ENSG00000170549	IRX1	79192	4238.67	-0.00884137	0.2287	-0.0386592	0.969162	0.988255
ENSMAUG00000001496	Kif18a	14458941	14512565	101837647	kinesin family member 18A [Source:NCBI gene;Acc:101837647]	protein_coding			Kif18a	101837647	ENSG00000121621	KIF18A	81930	73.5559	0.132442	0.217713	0.60833	0.542969	0.79608
ENSMAUG00000001501	Ar	3552668	3744918	101838789	androgen receptor [Source:NCBI gene;Acc:101838789]	protein_coding			Ar	101838789	ENSG00000169083	AR	367	31.4023	2.38198	0.658613	3.61667	0.000298422	0.0443903
ENSMAUG00000001502	Gm3336	398350	401859		predicted gene 3336 [Source:MGI Symbol;Acc:MGI:3781514]	protein_coding								32.636	-0.111988	0.41185	-0.271914	0.785688	0.908721
ENSMAUG00000001503	Rpl27a	9911666	9913846	101842263	ribosomal protein L27a [Source:NCBI gene;Acc:101842263]	protein_coding								17715.8	-0.152926	0.157597	-0.970362	0.331866	0.68641
ENSMAUG00000001504	Rwdd1	9057199	9065854	101840007	RWD domain containing 1 [Source:NCBI gene;Acc:101840007]	protein_coding			Rwdd1	101840007	ENSG00000111832	RWDD1	51389	2481.05	-0.156178	0.131403	-1.18854	0.234622	0.630057
ENSMAUG00000001505	Atg2b	10196372	10247166		autophagy related 2B [Source:MGI Symbol;Acc:MGI:1923809]	protein_coding			Atg2b		ENSG00000066739	ATG2B	55102	341.858	0.285722	0.247771	1.15317	0.24884	0.639577
ENSMAUG00000001509	QRICH2	5329224	5337975		glutamine rich 2 [Source:MGI Symbol;Acc:MGI:2684912]	protein_coding					ENSG00000129646	QRICH2	84074	76.2287	0.293798	0.31071	0.945569	0.344368	0.691408
ENSMAUG00000001510	Trim11	17997056	18010401	101827909	tripartite motif containing 11 [Source:NCBI gene;Acc:101827909]	protein_coding			Trim11	101827909	ENSG00000154370	TRIM11	81559	1643.22	-0.11664	0.117291	-0.994456	0.320001	0.678943
ENSMAUG00000001512	Nid2	4633193	4683214	101841573	nidogen 2 [Source:NCBI gene;Acc:101841573]	protein_coding			Nid2	101841573	ENSG00000087303	NID2	22795	977.272	0.236029	0.308016	0.766287	0.443506	0.741619
ENSMAUG00000001513	Myo3b	53538180	53927458	101842572	myosin IIIB [Source:NCBI gene;Acc:101842572]	protein_coding			Myo3b	101842572	ENSG00000071909	MYO3B	140469	19.8242	-0.305845	0.374632	-0.816388	0.414278	0.727683
ENSMAUG00000001514	Kcnip1	17951839	18220109	101828902	potassium voltage-gated channel interacting protein 1 [Source:NCBI gene;Acc:101828902]	protein_coding			Kcnip1	101828902	ENSG00000182132	KCNIP1	30820	171.609	-0.105154	0.271274	-0.387631	0.698289	0.870354
ENSMAUG00000001515	ECI2	18212373	18219240			protein_coding					ENSG00000198721	ECI2	10455	54.8898	0.0926449	0.32252	0.287254	0.773918	0.903304
ENSMAUG00000001516	Eral1	9377700	9382418	101827855	Era like 12S mitochondrial rRNA chaperone 1 [Source:NCBI gene;Acc:101827855]	protein_coding			Eral1	101827855	ENSG00000132591	ERAL1	26284	342.111	0.00799541	0.121191	0.0659738	0.947399	0.979559
ENSMAUG00000001518	PPM1H	8242020	8285343			protein_coding					ENSG00000111110	PPM1H	57460	1812.45	-0.0260907	0.0969818	-0.269027	0.787909	0.90953
ENSMAUG00000001519	Pcdh10	3528812	3583718	101829160	protocadherin 10 [Source:NCBI gene;Acc:101829160]	protein_coding			Pcdh10	101829160	ENSG00000138650	PCDH10	57575	33.1701	-0.417334	0.526387	-0.792827	0.427878	0.735708
ENSMAUG00000001523	Cobl	5282298	5522071	101844955	cordon-bleu WH2 repeat protein [Source:NCBI gene;Acc:101844955]	protein_coding			Cobl	101844955	ENSG00000106078	COBL	23242	2401.69	0.124719	0.251679	0.495547	0.620214	0.835181
ENSMAUG00000001526	Dhx37	3696636	3717674	101843621	DEAH-box helicase 37 [Source:NCBI gene;Acc:101843621]	protein_coding			Dhx37	101843621	ENSG00000150990	DHX37	57647	1723.59	-0.203869	0.124246	-1.64085	0.100828	0.564759
ENSMAUG00000001527	Sirt3	58083976	58095847	101841665	sirtuin 3 [Source:NCBI gene;Acc:101841665]	protein_coding			Sirt3	101841665	ENSG00000142082	SIRT3	23410	266.68	0.0977712	0.148426	0.658719	0.510076	0.779636
ENSMAUG00000001529	Ch25h	24642214	24643068	101823685	cholesterol 25-hydroxylase [Source:NCBI gene;Acc:101823685]	protein_coding			Ch25h	101823685	ENSG00000138135	CH25H	9023	109.007	0.0170345	0.278709	0.0611193	0.951264	0.980939
ENSMAUG00000001530	Sdr42e1	10667440	10679118	101832024	short chain dehydrogenase/reductase family 42E, member 1 [Source:NCBI gene;Acc:101832024]	protein_coding			Sdr42e1	101832024	ENSG00000184860	SDR42E1	93517	20.3476	-0.224906	0.471235	-0.47727	0.63317	0.840608
ENSMAUG00000001535	Slc12a7	35476758	35530223	101830655	solute carrier family 12 member 7 [Source:NCBI gene;Acc:101830655]	protein_coding			Slc12a7	101830655	ENSG00000113504	SLC12A7	10723	4004.17	0.140934	0.150133	0.938727	0.347871	0.69248
ENSMAUG00000001536	Zfp39	18095323	18108566	101832777	zinc finger protein 39-like [Source:NCBI gene;Acc:101832777]	protein_coding			Zfp39	101832777	ENSG00000171827	ZNF570	148268	619.474	0.0609864	0.10749	0.56737	0.570463	0.810852
ENSMAUG00000001537	ZNF235	1302712	1355266			protein_coding					ENSG00000159917	ZNF235	9310	724.741	-0.397256	0.134538	-2.95275	0.00314961	0.187574
ENSMAUG00000001542	Prrg3	347212	353796	101823611	proline rich and Gla domain 3 [Source:NCBI gene;Acc:101823611]	protein_coding			Prrg3	101823611	ENSG00000130032	PRRG3	79057	183.697	0.734336	0.455534	1.61203	0.106954	0.567727
ENSMAUG00000001543	SSTR1	1632	2807	101824516	somatostatin receptor 1 [Source:NCBI gene;Acc:101824516]	protein_coding				101824516	ENSG00000139874	SSTR1	6751	35.2022	-0.19028	0.433877	-0.438558	0.660982	0.85245
ENSMAUG00000001544	Adgrg2	10254663	10330789	101829172	adhesion G protein-coupled receptor G2 [Source:NCBI gene;Acc:101829172]	protein_coding			Adgrg2	101829172	ENSG00000173698	ADGRG2	10149	181.869	0.536502	0.457148	1.17359	0.240561	0.633824
ENSMAUG00000001545	Uap1	18568036	18604043	101841977	UDP-N-acetylglucosamine pyrophosphorylase 1 [Source:NCBI gene;Acc:101841977]	protein_coding			Uap1	101841977	ENSG00000117143	UAP1	6675	1520.44	0.373066	0.201505	1.8514	0.0641117	0.525066
ENSMAUG00000001546	Krcc1	11672621	11687034	101841551	lysine rich coiled-coil 1 [Source:NCBI gene;Acc:101841551]	protein_coding			Krcc1	101841551	ENSG00000172086	KRCC1	51315	2134.24	0.190635	0.0804889	2.36846	0.0178622	0.378628
ENSMAUG00000001547	Spns3	4417585	4470962	101829315	sphingolipid transporter 3 (putative) [Source:NCBI gene;Acc:101829315]	protein_coding			Spns3	101829315	ENSG00000182557	SPNS3	201305	140.297	-0.521448	0.308614	-1.68965	0.0910952	0.554333
ENSMAUG00000001548	Sap30l	19239491	19252498	101835743	SAP30 like [Source:NCBI gene;Acc:101835743]	protein_coding			Sap30l	101835743	ENSG00000164576	SAP30L	79685	3462.15	-0.0944449	0.0734936	-1.28508	0.198766	0.619155
ENSMAUG00000001550	Metrn	1205531	1208721	101841214	meteorin, glial cell differentiation regulator [Source:NCBI gene;Acc:101841214]	protein_coding			Metrn	101841214	ENSG00000103260	METRN	79006	2991.41	-0.242023	0.196296	-1.23295	0.217596	0.621869
ENSMAUG00000001556	Tm6sf2	1011754	1018435	101837297	transmembrane 6 superfamily member 2 [Source:NCBI gene;Acc:101837297]	protein_coding			Tm6sf2	101837297	ENSG00000213996	TM6SF2	53345	15.2946	-0.156908	0.460702	-0.340586	0.733416	0.885827
ENSMAUG00000001557	Casq1	9637418	9650242	101830350	calsequestrin 1 [Source:NCBI gene;Acc:101830350]	protein_coding			Casq1	101830350	ENSG00000143318	CASQ1	844	39.3727	-0.18117	0.585691	-0.309327	0.757073	0.896417
ENSMAUG00000001558	Spop	7842187	7859154	101840016	speckle type BTB/POZ protein [Source:NCBI gene;Acc:101840016]	protein_coding			Spop	101840016	ENSG00000121067	SPOP	8405	893.099	0.172132	0.173236	0.993628	0.320404	0.678943
ENSMAUG00000001559	Mpped2	16951123	17125585	101838975	metallophosphoesterase domain containing 2 [Source:NCBI gene;Acc:101838975]	protein_coding			Mpped2	101838975	ENSG00000066382	MPPED2	744	152.543	0.152689	0.228559	0.668051	0.504101	0.778185
ENSMAUG00000001563	Ankrd63	5258913	5260073	101842301	ankyrin repeat domain 63 [Source:NCBI gene;Acc:101842301]	protein_coding			Ankrd63	101842301	ENSG00000230778	ANKRD63	100131244	8.81394	-0.116258	0.608484	-0.191062	0.848477	0.93716
ENSMAUG00000001565	Tal1	6790761	6795631		T cell acute lymphocytic leukemia 1 [Source:MGI Symbol;Acc:MGI:98480]	protein_coding			Tal1		ENSG00000162367	TAL1	6886	87.8134	-0.100902	0.371494	-0.271612	0.785921	0.908721
ENSMAUG00000001567	LONP2	8045890	8151520			protein_coding					ENSG00000102910	LONP2	83752	2637.78	-0.0263137	0.0854902	-0.307797	0.758237	0.896756
ENSMAUG00000001573	L3mbtl4	2434670	2743084		L3MBTL4 histone methyl-lysine binding protein [Source:MGI Symbol;Acc:MGI:2444889]	protein_coding			L3mbtl4		ENSG00000154655	L3MBTL4	91133	8.65038	1.38014	0.660875	2.08836	0.0367654	0.474619
ENSMAUG00000001580	RPA3	841999	842341			protein_coding					ENSG00000106399	RPA3	6119	48.1642	-0.190009	0.221687	-0.857103	0.391388	0.71483
ENSMAUG00000001583	Lztr1	8261514	8279025		leucine-zipper-like transcriptional regulator, 1 [Source:MGI Symbol;Acc:MGI:1914113]	protein_coding			Lztr1		ENSG00000099949	LZTR1	8216	3570.48	-0.0639673	0.0865624	-0.738973	0.459923	0.750145
ENSMAUG00000001585	Wnt6	4128638	4141168	101842149	Wnt family member 6 [Source:NCBI gene;Acc:101842149]	protein_coding			Wnt6	101842149	ENSG00000115596	WNT6	7475	109.238	-0.332926	0.317278	-1.04932	0.294031	0.663271
ENSMAUG00000001586	Taldo1	57548512	57553660		transaldolase 1 [Source:MGI Symbol;Acc:MGI:1274789]	protein_coding			Taldo1		ENSG00000177156	TALDO1	6888	9896.42	-0.163754	0.187337	-0.874117	0.382054	0.711803
ENSMAUG00000001591	Wdr81	1802912	1813299		WD repeat domain 81 [Source:MGI Symbol;Acc:MGI:2681828]	protein_coding			Wdr81		ENSG00000167716	WDR81	124997	1798.9	-0.220842	0.137094	-1.61088	0.107207	0.567727
ENSMAUG00000001593	Akap17b	2923554	2958023	101827186	A-kinase anchor protein 17B [Source:NCBI gene;Acc:101827186]	protein_coding								141.483	0.235251	0.211612	1.11171	0.266262	0.65011
ENSMAUG00000001597	Dusp27	14731953	14762966	101834269	dual specificity phosphatase 27, atypical [Source:NCBI gene;Acc:101834269]	protein_coding			Dusp27	101834269	ENSG00000198842	STYXL2	92235	235.286	-0.193536	0.267998	-0.722157	0.470198	0.756245
ENSMAUG00000001598	Tubb3	16411717	16421445	101831134	tubulin beta 3 class III [Source:NCBI gene;Acc:101831134]	protein_coding								831.096	-0.848146	0.304984	-2.78096	0.0054199	0.239537
ENSMAUG00000001602	Ywhaz	14364110	14381681		tyrosine 3-monooxygenase/tryptophan 5-monooxygenase activation protein, zeta polypeptide [Source:MGI Symbol;Acc:MGI:109484]	protein_coding			Ywhaz		ENSG00000164924	YWHAZ	7534	5952.58	0.191629	0.211781	0.904847	0.365546	0.700423
ENSMAUG00000001604	Aif1	114897	116472	101844620	allograft inflammatory factor 1 [Source:NCBI gene;Acc:101844620]	protein_coding			Aif1	101844620	ENSG00000204472	AIF1	199	1677.72	-0.0498414	0.344665	-0.144608	0.88502	0.953747
ENSMAUG00000001605	Pigyl	8033240	8035029	101823307	phosphatidylinositol glycan anchor biosynthesis class Y [Source:NCBI gene;Acc:101823307]	protein_coding			Pigyl	101823307	ENSG00000255072	PIGY	84992	758.644	-0.181402	0.171976	-1.05481	0.291514	0.661128
ENSMAUG00000001609	Aurkaip1	454981	456159	101836381	aurora kinase A interacting protein 1 [Source:NCBI gene;Acc:101836381]	protein_coding			Aurkaip1	101836381	ENSG00000175756	AURKAIP1	54998	3506.49	-0.215541	0.154998	-1.39061	0.164344	0.605974
ENSMAUG00000001610	Acad8	3459650	3476631		acyl-Coenzyme A dehydrogenase family, member 8 [Source:MGI Symbol;Acc:MGI:1914198]	protein_coding			Acad8		ENSG00000151498	ACAD8	27034	723.905	0.0295731	0.13741	0.215218	0.829598	0.927221
ENSMAUG00000001614	Aldh7a1	3642659	3675555	101822560	aldehyde dehydrogenase 7 family member A1 [Source:NCBI gene;Acc:101822560]	protein_coding			Aldh7a1	101822560	ENSG00000164904	ALDH7A1	501	1498.66	-0.0799104	0.116593	-0.685379	0.493105	0.77215
ENSMAUG00000001620	Wfikkn1	1122132	1125622	101839326	WAP, follistatin/kazal, immunoglobulin, kunitz and netrin domain containing 1 [Source:NCBI gene;Acc:101839326]	protein_coding			Wfikkn1	101839326	ENSG00000127578	WFIKKN1	117166	610.659	-0.312339	0.22289	-1.40131	0.16112	0.603533
ENSMAUG00000001621	Stk26	2540253	2560863	101827202	serine/threonine kinase 26 [Source:NCBI gene;Acc:101827202]	protein_coding			Stk26	101827202	ENSG00000134602	STK26	51765	124.18	1.39688	0.521395	2.67912	0.0073816	0.283216
ENSMAUG00000001625	Lysmd3	31104959	31116932	101837566	LysM domain containing 3 [Source:NCBI gene;Acc:101837566]	protein_coding			Lysmd3	101837566	ENSG00000176018	LYSMD3	116068	1099.95	0.311887	0.222992	1.39865	0.161919	0.604754
ENSMAUG00000001627	GPR4	2956	4047	101838647	G protein-coupled receptor 4 [Source:NCBI gene;Acc:101838647]	protein_coding				101838647	ENSG00000177464	GPR4	2828	1201.06	-0.354283	0.228893	-1.54781	0.121667	0.576543
ENSMAUG00000001628	ADAM19	5769192	5849291	101840268	ADAM metallopeptidase domain 19 [Source:NCBI gene;Acc:101840268]	protein_coding				101840268	ENSG00000135074	ADAM19	8728	807.28	0.597362	0.419172	1.4251	0.154128	0.599554
ENSMAUG00000001630	Rtn4ip1	217591	259913	101823553	reticulon 4 interacting protein 1 [Source:NCBI gene;Acc:101823553]	protein_coding			Rtn4ip1	101823553	ENSG00000130347	RTN4IP1	84816	390.369	-0.0353745	0.121323	-0.291574	0.770613	0.90195
ENSMAUG00000001635	Slc34a3	2095383	2101356	101830636	solute carrier family 34 member 3 [Source:NCBI gene;Acc:101830636]	protein_coding			Slc34a3	101830636	ENSG00000198569	SLC34A3	142680	46.3184	0.488531	0.359207	1.36003	0.173821	0.611248
ENSMAUG00000001636	EPB41	5028928	5060399			protein_coding					ENSG00000159023	EPB41	2035	1149.42	0.147435	0.252079	0.584875	0.558632	0.805204
ENSMAUG00000001637	Mgat3	2434627	2474929	101833726	beta-1,4-mannosyl-glycoprotein 4-beta-N-acetylglucosaminyltransferase [Source:NCBI gene;Acc:101833726]	protein_coding			Mgat3	101833726	ENSG00000128268	MGAT3	4248	157.127	0.52938	0.420439	1.25911	0.207989	0.621679
ENSMAUG00000001641	Upk1b	2033379	2062447	101840000	uroplakin 1B [Source:NCBI gene;Acc:101840000]	protein_coding			Upk1b	101840000	ENSG00000114638	UPK1B	7348	2767.03	0.743208	0.765135	0.971343	0.331378	0.686202
ENSMAUG00000001642	H2ac1	28113540	28113932	101823521	histone H2A type 4 [Source:NCBI gene;Acc:101823521]	protein_coding			H2ac1	101823521	ENSG00000164508	H2AC1	221613	10.7186	-0.330991	0.561724	-0.589241	0.5557	0.803311
ENSMAUG00000001644	CCNB1	12777002	12783466			protein_coding					ENSG00000134057	CCNB1	891	152.945	-0.23285	0.363399	-0.640756	0.521681	0.785218
ENSMAUG00000001649	Cyp26b1	1660409	1676015	101840643	cytochrome P450 26B1 [Source:NCBI gene;Acc:101840643]	protein_coding			Cyp26b1	101840643	ENSG00000003137	CYP26B1	56603	554.88	0.732213	0.799314	0.916051	0.35964	0.698206
ENSMAUG00000001657	Nit2	5089123	5100618		nitrilase family, member 2 [Source:MGI Symbol;Acc:MGI:1261838]	protein_coding			Nit2		ENSG00000114021	NIT2	56954	426.44	0.0120629	0.21977	0.0548889	0.956227	0.982982
ENSMAUG00000001659	Fat2	21674636	21729462	101838998	FAT atypical cadherin 2 [Source:NCBI gene;Acc:101838998]	protein_coding			Fat2	101838998	ENSG00000086570	FAT2	2196	110.385	-0.366113	0.280567	-1.3049	0.191926	0.615704
ENSMAUG00000001661	Gcnt7	6354707	6358441	106021496	glucosaminyl (N-acetyl) transferase family member 7 [Source:NCBI gene;Acc:106021496]	protein_coding			Gcnt7	106021496	ENSG00000124091	GCNT7	140687	5.76821	-2.63199	1.35188	-1.94691	0.0515454	0.508843
ENSMAUG00000001665	Vps36	219743	247050	101836337	vacuolar protein sorting 36 homolog [Source:NCBI gene;Acc:101836337]	protein_coding			Vps36	101836337	ENSG00000136100	VPS36	51028	2000.83	0.117222	0.0899108	1.30376	0.192315	0.615704
ENSMAUG00000001668	CACYBP	22536200	22536934			protein_coding					ENSG00000116161	CACYBP	27101	549.904	-0.122274	0.128866	-0.94885	0.342697	0.690558
ENSMAUG00000001669	TIMM23	5981266	5983076			protein_coding					ENSG00000265354	TIMM23	100287932	318.874	0.00363301	0.100183	0.0362638	0.971072	0.988817
ENSMAUG00000001671	Apip	20748058	20766042	101825367	APAF1 interacting protein [Source:NCBI gene;Acc:101825367]	protein_coding			Apip	101825367	ENSG00000149089	APIP	51074	765.028	-0.199117	0.137738	-1.44562	0.148285	0.594745
ENSMAUG00000001673	Cct6b	4688186	4722575	101837533	chaperonin containing TCP1 subunit 6B [Source:NCBI gene;Acc:101837533]	protein_coding			Cct6b	101837533	ENSG00000132141	CCT6B	10693	28.1045	0.466134	0.334545	1.39333	0.163519	0.605686
ENSMAUG00000001676	Prr18	981799	985550	101836318	proline rich 18 [Source:NCBI gene;Acc:101836318]	protein_coding			Prr18	101836318	ENSG00000176381	PRR18	285800	77.5997	0.342422	0.242667	1.41108	0.158222	0.602563
ENSMAUG00000001677	Suz12	7345037	7378654		SUZ12 polycomb repressive complex 2 subunit [Source:MGI Symbol;Acc:MGI:1261758]	protein_coding			Suz12		ENSG00000178691	SUZ12	23512	888.853	0.432301	0.367046	1.17779	0.238882	0.632894
ENSMAUG00000001678	CFAP46	59096299	59107540			protein_coding					ENSG00000171811	CFAP46	54777	49.7894	0.596245	0.500791	1.19061	0.233809	0.630022
ENSMAUG00000001682	Sec14l4	22806889	22821749	101836694	SEC14-like protein 4 [Source:NCBI gene;Acc:101836694]	protein_coding			Sec14l4	101836694	ENSG00000133488	SEC14L4	284904	11641.9	0.0697648	0.187576	0.371928	0.709947	0.875456
ENSMAUG00000001685	Snai3	15433213	15440327	101823022	snail family transcriptional repressor 3 [Source:NCBI gene;Acc:101823022]	protein_coding			Snai3	101823022	ENSG00000185669	SNAI3	333929	15.4551	0.101473	0.432174	0.234798	0.814366	0.921871
ENSMAUG00000001687	Gtf3c5	1814486	1835655	101833637	general transcription factor IIIC subunit 5 [Source:NCBI gene;Acc:101833637]	protein_coding			Gtf3c5	101833637	ENSG00000148308	GTF3C5	9328	1570.8	-0.0660265	0.0503772	-1.31064	0.189978	0.615411
ENSMAUG00000001690	Snrnp35	3486	4226	101833229	small nuclear ribonucleoprotein U11/U12 subunit 35 [Source:NCBI gene;Acc:101833229]	protein_coding			Snrnp35	101833229	ENSG00000184209	SNRNP35	11066	1116.28	-0.238505	0.171158	-1.39348	0.163476	0.605686
ENSMAUG00000001692	Saa3	20490	23136		serum amyloid A 3 [Source:MGI Symbol;Acc:MGI:98223]	protein_coding								9825.98	0.130915	0.474799	0.275726	0.782758	0.907387
ENSMAUG00000001693	Trpv2	14351155	14373454	101830671	transient receptor potential cation channel subfamily V member 2 [Source:NCBI gene;Acc:101830671]	protein_coding			Trpv2	101830671	ENSG00000187688	TRPV2	51393	1951.59	-0.0890749	0.194017	-0.459109	0.646156	0.846407
ENSMAUG00000001695	Mms22l	28373917	28508468		MMS22-like, DNA repair protein [Source:MGI Symbol;Acc:MGI:2684980]	protein_coding			Mms22l		ENSG00000146263	MMS22L	253714	196.376	-0.128835	0.158434	-0.81318	0.416115	0.729378
ENSMAUG00000001696	Dhx16	210100	223640	101826767	DEAH-box helicase 16 [Source:NCBI gene;Acc:101826767]	protein_coding			Dhx16	101826767	ENSG00000204560	DHX16	8449	2244.4	-0.180524	0.0942081	-1.91623	0.0553359	0.510703
ENSMAUG00000001698	Igfbp5	5912996	5929593	101824785	insulin like growth factor binding protein 5 [Source:NCBI gene;Acc:101824785]	protein_coding			Igfbp5	101824785	ENSG00000115461	IGFBP5	3488	22430.7	1.06876	0.771044	1.38612	0.165712	0.606715
ENSMAUG00000001700	Ucp1	610183	614270		uncoupling protein 1 (mitochondrial, proton carrier) [Source:MGI Symbol;Acc:MGI:98894]	protein_coding			Ucp1		ENSG00000109424	UCP1	7350	204.598	-1.07883	2.2174	-0.486529	0.626592	0.837517
ENSMAUG00000001701	Pacrg	34787	417129	101824847	parkin coregulated [Source:NCBI gene;Acc:101824847]	protein_coding			Pacrg	101824847	ENSG00000112530	PACRG	135138	283.868	0.161302	0.302306	0.53357	0.593639	0.822108
ENSMAUG00000001703	Tmtc4	7826827	7885219	101841378	transmembrane O-mannosyltransferase targeting cadherins 4 [Source:NCBI gene;Acc:101841378]	protein_coding			Tmtc4	101841378	ENSG00000125247	TMTC4	84899	1181.31	0.0912151	0.0993048	0.918537	0.358338	0.696977
ENSMAUG00000001705	Tyro3	4140246	4159631	101834235	TYRO3 protein tyrosine kinase [Source:NCBI gene;Acc:101834235]	protein_coding			Tyro3	101834235	ENSG00000092445	TYRO3	7301	3854.66	-0.3249	0.190879	-1.70212	0.088732	0.550273
ENSMAUG00000001706	Cyp2e1	58193423	58204704	101843716	cytochrome P450 2E1-like [Source:NCBI gene;Acc:101843716]	protein_coding			Cyp2e1	101843716	ENSG00000130649	CYP2E1	1571	21215.3	-0.674521	0.350881	-1.92237	0.0545597	0.510218
ENSMAUG00000001708	P2RY10	578145	578510			protein_coding					ENSG00000078589	P2RY10	27334	32.602	0.830861	0.496247	1.67429	0.0940739	0.559622
ENSMAUG00000001710	4933434E20Rik	6635101	6647497	101844751	chromosome unknown C1orf43 homolog [Source:NCBI gene;Acc:101844751]	protein_coding				101844751	ENSG00000143612	C1orf43	25912	1606.62	-0.04337	0.0807554	-0.537054	0.591231	0.82073
ENSMAUG00000001713	Mgst1	5645355	5661975		microsomal glutathione S-transferase 1 [Source:MGI Symbol;Acc:MGI:1913850]	protein_coding			Mgst1		ENSG00000008394	MGST1	4257	5634.8	0.0853909	0.118417	0.721101	0.470847	0.75671
ENSMAUG00000001714	Prr36	762539	769686	101837289	proline rich 36 [Source:NCBI gene;Acc:101837289]	protein_coding			Prr36	101837289	ENSG00000183248	PRR36	80164	497.139	-0.0322002	0.177388	-0.181524	0.855956	0.940005
ENSMAUG00000001715	Pccb	1918835	1985964	101827757	propionyl-CoA carboxylase subunit beta [Source:NCBI gene;Acc:101827757]	protein_coding			Pccb	101827757	ENSG00000114054	PCCB	5096	1145.82	0.108301	0.128696	0.841528	0.400052	0.718531
ENSMAUG00000001716	Zfyve16	20945939	20992347	101834422	zinc finger FYVE-type containing 16 [Source:NCBI gene;Acc:101834422]	protein_coding								1076.94	0.382277	0.204939	1.86532	0.0621365	0.524211
ENSMAUG00000001720	Use1	1015796	1017988		unconventional SNARE in the ER 1 homolog (S. cerevisiae) [Source:MGI Symbol;Acc:MGI:1914273]	protein_coding			Use1		ENSG00000053501	USE1	55850	3110.12	-0.12982	0.175521	-0.739626	0.459527	0.749966
ENSMAUG00000001722	GET1-SH3BGR	1881145	1903554		SH3-binding domain glutamic acid-rich protein [Source:MGI Symbol;Acc:MGI:1354740]	protein_coding					ENSG00000285815	GET1-SH3BGR	106865373	1382.58	-0.347575	0.241914	-1.43677	0.150783	0.596511
ENSMAUG00000001723	Qrfp	2475603	2476001		pyroglutamylated RFamide peptide [Source:MGI Symbol;Acc:MGI:3630329]	protein_coding			Qrfp		ENSG00000188710	QRFP	347148	8.72601	0.0477208	0.599257	0.0796334	0.936529	0.975061
ENSMAUG00000001727	Terf1	11255183	11284628	101835220	telomeric repeat binding factor 1 [Source:NCBI gene;Acc:101835220]	protein_coding			Terf1	101835220	ENSG00000147601	TERF1	7013	690.139	0.117801	0.144029	0.817902	0.413413	0.727153
ENSMAUG00000001728	RPL35	3127630	3131198	101839601	ribosomal protein L35 [Source:NCBI gene;Acc:101839601]	protein_coding				101839601	ENSG00000136942	RPL35	11224	14523.3	-0.241161	0.178824	-1.34859	0.177468	0.611361
ENSMAUG00000001729	Ascc2	23462671	23511486		activating signal cointegrator 1 complex subunit 2 [Source:MGI Symbol;Acc:MGI:1922702]	protein_coding			Ascc2		ENSG00000100325	ASCC2	84164	2439.88	-0.243139	0.119365	-2.03694	0.0416563	0.479523
ENSMAUG00000001731	Ppp2r2d	59900031	59932758	101828589	protein phosphatase 2 regulatory subunit Bdelta [Source:NCBI gene;Acc:101828589]	protein_coding			Ppp2r2d	101828589	ENSG00000175470	PPP2R2D	55844	1410.17	-0.11546	0.0925157	-1.248	0.21203	0.621679
ENSMAUG00000001735	Uhmk1	18641908	18662343	101842608	U2AF homology motif kinase 1 [Source:NCBI gene;Acc:101842608]	protein_coding			Uhmk1	101842608	ENSG00000152332	UHMK1	127933	1145.29	0.372327	0.281709	1.32167	0.186278	0.614384
ENSMAUG00000001736	Slc4a10	22271425	22523327	101833143	solute carrier family 4 member 10 [Source:NCBI gene;Acc:101833143]	protein_coding			Slc4a10	101833143	ENSG00000144290	SLC4A10	57282	8.45994	-0.929683	0.88135	-1.05484	0.291499	0.661128
ENSMAUG00000001738	Klhl15	66694	107982	101826501	kelch like family member 15 [Source:NCBI gene;Acc:101826501]	protein_coding			Klhl15	101826501	ENSG00000174010	KLHL15	80311	443.278	0.184426	0.160536	1.14882	0.250632	0.640068
ENSMAUG00000001739	Fhl4	1651645	1652487		four and a half LIM domains 4 [Source:MGI Symbol;Acc:MGI:1338765]	protein_coding			Fhl4		ENSG00000022267	FHL1	2273	47.0033	0.254601	0.300103	0.848378	0.396228	0.71637
ENSMAUG00000001743	Fam114a1	4593835	4654325	101829434	family with sequence similarity 114 member A1 [Source:NCBI gene;Acc:101829434]	protein_coding			Fam114a1	101829434	ENSG00000197712	FAM114A1	92689	2132.48	0.0681444	0.138678	0.491384	0.623155	0.836363
ENSMAUG00000001745	Rlim	1102378	1106459	101836855	ring finger protein, LIM domain interacting [Source:NCBI gene;Acc:101836855]	protein_coding			Rlim	101836855	ENSG00000131263	RLIM	51132	465.999	0.447713	0.343804	1.30223	0.192837	0.615704
ENSMAUG00000001751	PNPLA6	243618	275886			protein_coding					ENSG00000032444	PNPLA6	10908	2269.97	-0.0610067	0.161623	-0.377464	0.705829	0.874133
ENSMAUG00000001752	Cdca8	2103311	2118824	101833880	cell division cycle associated 8 [Source:NCBI gene;Acc:101833880]	protein_coding			Cdca8	101833880	ENSG00000134690	CDCA8	55143	694.941	-0.138808	0.262919	-0.52795	0.597534	0.824475
ENSMAUG00000001754	Crnn	8308169	8310944	106021936	cornulin [Source:NCBI gene;Acc:106021936]	protein_coding			Crnn	106021936	ENSG00000143536	CRNN	49860	7.29274	0.756925	1.16778	0.648173	0.516873	0.782939
ENSMAUG00000001755	Entpd1	18630353	18748182	101840694	ectonucleoside triphosphate diphosphohydrolase 1 [Source:NCBI gene;Acc:101840694]	protein_coding			Entpd1	101840694	ENSG00000138185	ENTPD1	953	711.918	0.108693	0.398999	0.272416	0.785302	0.908589
ENSMAUG00000001759	Spag6l	9002265	9060463	101827344	sperm-associated antigen 6 [Source:NCBI gene;Acc:101827344]	protein_coding			Spag6l	101827344	ENSG00000077327	SPAG6	9576	750.584	0.336927	0.274448	1.22766	0.219576	0.623064
ENSMAUG00000001763	TES	1728461	1768154	101826393	testin LIM domain protein [Source:NCBI gene;Acc:101826393]	protein_coding				101826393	ENSG00000135269	TES	26136	3300.14	0.0393693	0.212963	0.184864	0.853336	0.939212
ENSMAUG00000001766	Gpr15lg	648129	654791	101838779	chromosome unknown C10orf99 homolog [Source:NCBI gene;Acc:101838779]	protein_coding			2610528A11Rik	101838779	ENSG00000188373	C10orf99	387695	37.9068	0.155687	0.489397	0.31812	0.750394	0.893345
ENSMAUG00000001769	Stard13	164613	325090	101836067	StAR related lipid transfer domain containing 13 [Source:NCBI gene;Acc:101836067]	protein_coding				101836067	ENSG00000133121	STARD13	90627	4237.46	0.235852	0.230245	1.02435	0.305669	0.672245
ENSMAUG00000001771	Gm45521	6828552	6831802		predicted gene 45521 [Source:MGI Symbol;Acc:MGI:5791357]	protein_coding			Gm45521		ENSG00000272899	ATP6V1FNB	100130705	184.731	0.354635	0.303405	1.16885	0.242464	0.635058
ENSMAUG00000001773	YWHAH	704	1234	101836874	tyrosine 3-monooxygenase/tryptophan 5-monooxygenase activation protein eta [Source:NCBI gene;Acc:101836874]	protein_coding				101836874	ENSG00000128245	YWHAH	7533	2927.39	-0.0117916	0.0870033	-0.13553	0.892193	0.957758
ENSMAUG00000001774	Adgra1	58907689	58945312	101826746	adhesion G protein-coupled receptor A1 [Source:NCBI gene;Acc:101826746]	protein_coding			Adgra1	101826746	ENSG00000197177	ADGRA1	84435	13.9462	0.0101441	0.638177	0.0158954	0.987318	0.995548
ENSMAUG00000001775	Bmp4	1383026	1386444	101828063	bone morphogenetic protein 4 [Source:NCBI gene;Acc:101828063]	protein_coding			Bmp4	101828063	ENSG00000125378	BMP4	652	4918.61	-0.348202	0.159666	-2.18081	0.0291975	0.449263
ENSMAUG00000001776	TEX19	703545	704537	101832786	testis-expressed protein 19.2 [Source:NCBI gene;Acc:101832786]	protein_coding				101832786	ENSG00000182459	TEX19	400629	6.29813	-0.0757486	0.703133	-0.10773	0.91421	0.966565
ENSMAUG00000001778	Gfer	2369295	2371657	101827870	growth factor, augmenter of liver regeneration [Source:NCBI gene;Acc:101827870]	protein_coding			Gfer	101827870	ENSG00000127554	GFER	2671	1426.87	-0.142578	0.127081	-1.12195	0.261883	0.646882
ENSMAUG00000001783	PCP4	1582102	1642096	101844919	Purkinje cell protein 4 [Source:NCBI gene;Acc:101844919]	protein_coding				101844919	ENSG00000183036	PCP4	5121	49.1112	-0.183638	0.697149	-0.263413	0.792233	0.910425
ENSMAUG00000001787	Fndc3b	20220462	20437553	101826355	fibronectin type III domain containing 3B [Source:NCBI gene;Acc:101826355]	protein_coding			Fndc3b	101826355	ENSG00000075420	FNDC3B	64778	2376.32	0.506398	0.243872	2.07649	0.0378488	0.475823
ENSMAUG00000001788	Ntrk3	3610793	3976695	101843505	neurotrophic receptor tyrosine kinase 3 [Source:NCBI gene;Acc:101843505]	protein_coding			Ntrk3	101843505	ENSG00000140538	NTRK3	4916	67.5282	0.378551	0.345185	1.09666	0.27279	0.65437
ENSMAUG00000001789	ELF4	240	3630	101841868	ETS-related transcription factor Elf-4-like [Source:NCBI gene;Acc:101841868]	protein_coding				101841868	ENSG00000102034	ELF4	2000	110.255	0.522362	0.381122	1.37059	0.170503	0.60869
ENSMAUG00000001790	Rad17	12923104	12952582	101837032	RAD17 checkpoint clamp loader component [Source:NCBI gene;Acc:101837032]	protein_coding			Rad17	101837032	ENSG00000152942	RAD17	5884	563.675	-0.0937142	0.095878	-0.977432	0.328355	0.683762
ENSMAUG00000001792	P2ry10	646544	647557		purinergic receptor P2Y, G-protein coupled 10 [Source:MGI Symbol;Acc:MGI:1926076]	protein_coding					ENSG00000078589	P2RY10	27334	60.83	0.586758	0.437935	1.33983	0.1803	0.611715
ENSMAUG00000001794	Spsb4	6738652	6826242	101832743	splA/ryanodine receptor domain and SOCS box containing 4 [Source:NCBI gene;Acc:101832743]	protein_coding			Spsb4	101832743	ENSG00000175093	SPSB4	92369	109.489	-0.158334	0.254741	-0.62155	0.534238	0.791509
ENSMAUG00000001797	Adap2	7173038	7202941	101843068	ArfGAP with dual PH domains 2 [Source:NCBI gene;Acc:101843068]	protein_coding			Adap2	101843068	ENSG00000184060	ADAP2	55803	562.031	-0.0499131	0.195401	-0.25544	0.798383	0.91281
ENSMAUG00000001798	Capn11	9660698	9681255	101825405	calpain 11 [Source:NCBI gene;Acc:101825405]	protein_coding			Capn11	101825405	ENSG00000137225	CAPN11	11131	30.7508	-0.0591022	0.434047	-0.136165	0.891691	0.957671
ENSMAUG00000001801	Srl	4338287	4382563		sarcalumenin [Source:MGI Symbol;Acc:MGI:2146620]	protein_coding			Srl		ENSG00000185739	SRL	6345	82.7267	0.0504517	0.313853	0.160749	0.872291	0.947988
ENSMAUG00000001802	Ltk	4196029	4205086	101824119	leukocyte receptor tyrosine kinase [Source:NCBI gene;Acc:101824119]	protein_coding			Ltk	101824119	ENSG00000062524	LTK	4058	8.03955	-0.522275	0.677966	-0.770356	0.441089	0.741355
ENSMAUG00000001803	Ift57	7486316	7539432		intraflagellar transport 57 [Source:MGI Symbol;Acc:MGI:1921166]	protein_coding			Ift57		ENSG00000114446	IFT57	55081	1333.49	0.283544	0.152954	1.85378	0.06377	0.525066
ENSMAUG00000001805	NBEAL1	18257958	18294640			protein_coding					ENSG00000144426	NBEAL1	65065	286.839	0.393575	0.253488	1.55264	0.12051	0.576218
ENSMAUG00000001806	Etfa	17983321	18032507		electron transferring flavoprotein, alpha polypeptide [Source:MGI Symbol;Acc:MGI:106092]	protein_coding			Etfa		ENSG00000140374	ETFA	2108	2272.84	0.182607	0.175821	1.03859	0.298994	0.667102
ENSMAUG00000001807	Ly6d	2820243	2821747	101823240	lymphocyte antigen 6 family member D [Source:NCBI gene;Acc:101823240]	protein_coding			Ly6d	101823240	ENSG00000167656	LY6D	8581	1529.51	-0.0949705	0.311646	-0.304738	0.760565	0.89776
ENSMAUG00000001810	Scg2	237461	242712	101829203	secretogranin II [Source:NCBI gene;Acc:101829203]	protein_coding			Scg2	101829203	ENSG00000171951	SCG2	7857	45.6372	2.97829	0.987517	3.01594	0.00256184	0.176924
ENSMAUG00000001811	MARCHF5	21751464	21772633	101838169	membrane associated ring-CH-type finger 5 [Source:NCBI gene;Acc:101838169]	protein_coding				101838169	ENSG00000198060	MARCHF5	54708	1551.7	0.245313	0.0992422	2.47186	0.0134412	0.33945
ENSMAUG00000001812	Uhrf1bp1	1057956	1090730	101842566	UHRF1 binding protein 1 [Source:NCBI gene;Acc:101842566]	protein_coding			Uhrf1bp1	101842566	ENSG00000065060	UHRF1BP1	54887	367.39	0.215468	0.296447	0.726835	0.467327	0.75503
ENSMAUG00000001813	Ccdc149	2095205	2185137		coiled-coil domain containing 149 [Source:MGI Symbol;Acc:MGI:2685293]	protein_coding			Ccdc149		ENSG00000181982	CCDC149	91050	272.808	0.221126	0.225135	0.98219	0.326006	0.682698
ENSMAUG00000001814	SLC2A5	6336826	6349242			protein_coding					ENSG00000142583	SLC2A5	6518	42.5892	0.133953	0.246434	0.543565	0.586741	0.819313
ENSMAUG00000001816	Lrch1	14251190	14428118	101832886	leucine rich repeats and calponin homology domain containing 1 [Source:NCBI gene;Acc:101832886]	protein_coding			Lrch1	101832886	ENSG00000136141	LRCH1	23143	1579.93	0.280518	0.248784	1.12756	0.259508	0.645784
ENSMAUG00000001821	Abhd8	75400	80528	101836954	abhydrolase domain containing 8 [Source:NCBI gene;Acc:101836954]	protein_coding			Abhd8	101836954	ENSG00000127220	ABHD8	79575	2077.61	-0.409781	0.155566	-2.63413	0.00843537	0.291439
ENSMAUG00000001822	Fuom	58702095	58707589	101824220	fucose mutarotase [Source:NCBI gene;Acc:101824220]	protein_coding			Fuom	101824220	ENSG00000148803	FUOM	282969	178.415	0.179581	0.263781	0.680796	0.496001	0.773719
ENSMAUG00000001823	Sod3	5108	5845	101843571	superoxide dismutase 3 [Source:NCBI gene;Acc:101843571]	protein_coding			Sod3	101843571	ENSG00000109610	SOD3	6649	535.295	-0.131519	0.230669	-0.570165	0.568566	0.809962
ENSMAUG00000001824	Cybc1	597378	605059	101831565	chromosome unknown C17orf62 homolog [Source:NCBI gene;Acc:101831565]	protein_coding			Cybc1	101831565	ENSG00000178927	CYBC1	79415	2787.89	-0.0257246	0.0950212	-0.270725	0.786603	0.908933
ENSMAUG00000001827	Dad1	847309	868558	101827723	defender against cell death 1 [Source:NCBI gene;Acc:101827723]	protein_coding			Dad1	101827723	ENSG00000129562	DAD1	1603	5113.52	-0.223835	0.160602	-1.39372	0.163401	0.605601
ENSMAUG00000001828	Pde7a	21579852	21672454	101823440	phosphodiesterase 7A [Source:NCBI gene;Acc:101823440]	protein_coding			Pde7a	101823440	ENSG00000205268	PDE7A	5150	2127.25	0.0687616	0.152068	0.452177	0.651142	0.848687
ENSMAUG00000001830	MTMR3	23295117	23299889			protein_coding					ENSG00000100330	MTMR3	8897	834.641	-0.0567442	0.117067	-0.484717	0.627877	0.838119
ENSMAUG00000001831	Igf2bp3	633692	766236	101840982	insulin like growth factor 2 mRNA binding protein 3 [Source:NCBI gene;Acc:101840982]	protein_coding			Igf2bp3	101840982	ENSG00000136231	IGF2BP3	10643	8.01211	0.412927	0.510586	0.808731	0.41867	0.730822
ENSMAUG00000001833	2210016F16Rik	4597820	4605522	101838508	chromosome unknown C9orf64 homolog [Source:NCBI gene;Acc:101838508]	protein_coding			2210016F16Rik	101838508	ENSG00000165118	C9orf64	84267	1049.52	-0.121594	0.135599	-0.896715	0.369871	0.703764
ENSMAUG00000001834	Phf21b	6844024	6911522	101825896	PHD finger protein 21B [Source:NCBI gene;Acc:101825896]	protein_coding			Phf21b	101825896	ENSG00000056487	PHF21B	112885	21.0689	-0.283798	0.35984	-0.788678	0.4303	0.737132
ENSMAUG00000001835	Ppm1l	404114	673447	101842920	protein phosphatase, Mg2+/Mn2+ dependent 1L [Source:NCBI gene;Acc:101842920]	protein_coding			Ppm1l	101842920	ENSG00000163590	PPM1L	151742	142.554	0.469763	0.480299	0.978063	0.328043	0.683762
ENSMAUG00000001836	Tafazzin	248616	256007	101827468	tafazzin [Source:NCBI gene;Acc:101827468]	protein_coding			Taz	101827468	ENSG00000102125	TAFAZZIN	6901	670.606	-0.0523763	0.133511	-0.392299	0.694838	0.868621
ENSMAUG00000001837	Ston1	10108833	10126061	106020716	stonin 1 [Source:NCBI gene;Acc:106020716]	protein_coding								901.941	0.211327	0.286917	0.736544	0.4614	0.750298
ENSMAUG00000001838	Lingo2	2732152	2733972	110339202	leucine rich repeat and Ig domain containing 2 [Source:NCBI gene;Acc:110339202]	protein_coding			Lingo2	110339202	ENSG00000174482	LINGO2	158038	1.75701	-2.51303	3.38083	-0.743317	0.45729	0.749176
ENSMAUG00000001839	Parp10	874598	877794		poly (ADP-ribose) polymerase family, member 10 [Source:MGI Symbol;Acc:MGI:3712326]	protein_coding			Parp10		ENSG00000178685	PARP10	84875	3502.37	0.179646	0.159793	1.12424	0.26091	0.64618
ENSMAUG00000001840	Tpgs1	2501947	2509542	101842730	tubulin polyglutamylase complex subunit 1 [Source:NCBI gene;Acc:101842730]	protein_coding			Tpgs1	101842730	ENSG00000141933	TPGS1	91978	2850.56	-0.163231	0.179204	-0.910868	0.362365	0.699664
ENSMAUG00000001841	Slc35e2	659554	675142		solute carrier family 35, member E2 [Source:MGI Symbol;Acc:MGI:2444240]	protein_coding			Slc35e2		ENSG00000189339	SLC35E2B	728661	73.3905	0.507202	0.375429	1.351	0.176697	0.611361
ENSMAUG00000001849	Khnyn	2534302	2541990	101842304	KH and NYN domain containing [Source:NCBI gene;Acc:101842304]	protein_coding			Khnyn	101842304	ENSG00000100441	KHNYN	23351	969.294	0.0952343	0.185874	0.512359	0.6084	0.830704
ENSMAUG00000001850	Samd12	773704	1226799	101834183	sterile alpha motif domain containing 12 [Source:NCBI gene;Acc:101834183]	protein_coding			Samd12	101834183	ENSG00000177570	SAMD12	401474	149.726	0.0912794	0.195642	0.466563	0.640813	0.84396
ENSMAUG00000001852	Nol3	548160	552643	101837879	nucleolar protein 3 [Source:NCBI gene;Acc:101837879]	protein_coding			Nol3	101837879	ENSG00000140939	NOL3	8996	739.943	-0.0763984	0.207754	-0.367735	0.713071	0.87637
ENSMAUG00000001857	Snf8	8386484	8408232	101827506	SNF8 subunit of ESCRT-II [Source:NCBI gene;Acc:101827506]	protein_coding			Snf8	101827506	ENSG00000159210	SNF8	11267	3207.78	-0.222359	0.167286	-1.32922	0.183776	0.612769
ENSMAUG00000001858	Capg	23243	38234	101825334	capping actin protein, gelsolin like [Source:NCBI gene;Acc:101825334]	protein_coding			Capg	101825334	ENSG00000042493	CAPG	822	8199.82	-0.140626	0.232724	-0.604258	0.545672	0.798359
ENSMAUG00000001866	Mafg	1182671	1190906	101837054	MAF bZIP transcription factor G [Source:NCBI gene;Acc:101837054]	protein_coding			Mafg	101837054	ENSG00000197063	MAFG	4097	3907.29	-0.0143442	0.0788255	-0.181974	0.855603	0.939949
ENSMAUG00000001868	Syt14	2081663	2191261	101836748	synaptotagmin 14 [Source:NCBI gene;Acc:101836748]	protein_coding			Syt14	101836748	ENSG00000143469	SYT14	255928	5.58533	0.0844369	0.743811	0.113519	0.909619	0.964847
ENSMAUG00000001869	Gtf2a1	23908800	23925743	101834968	general transcription factor IIA subunit 1 [Source:NCBI gene;Acc:101834968]	protein_coding			Gtf2a1	101834968	ENSG00000165417	GTF2A1	2957	595.189	0.169875	0.17528	0.969163	0.332464	0.686645
ENSMAUG00000001870	Mcat	5643476	5651983	101823787	malonyl-CoA-acyl carrier protein transacylase [Source:NCBI gene;Acc:101823787]	protein_coding			Mcat	101823787	ENSG00000100294	MCAT	27349	1588.05	-0.222316	0.116536	-1.90771	0.0564293	0.511929
ENSMAUG00000001871	Cop1	8149991	8270947	101840804	COP1 E3 ubiquitin ligase [Source:NCBI gene;Acc:101840804]	protein_coding			Cop1	101840804	ENSG00000143207	COP1	64326	3025.1	-0.149582	0.0991338	-1.50889	0.131328	0.580304
ENSMAUG00000001872	Fn1	7125096	7191636	101826613	fibronectin 1 [Source:NCBI gene;Acc:101826613]	protein_coding			Fn1	101826613	ENSG00000115414	FN1	2335	33431.1	-0.134765	0.276942	-0.486617	0.62653	0.837517
ENSMAUG00000001873	Fech	9314347	9344552	101833515	ferrochelatase [Source:NCBI gene;Acc:101833515]	protein_coding			Fech	101833515	ENSG00000066926	FECH	2235	1335.23	0.333328	0.188056	1.77249	0.076313	0.536916
ENSMAUG00000001882	HNRNPH2	7	5303	101832174	heterogeneous nuclear ribonucleoprotein H2 [Source:NCBI gene;Acc:101832174]	protein_coding				101832174	ENSG00000126945	HNRNPH2	3188	3820	0.0543489	0.12627	0.430419	0.666891	0.854752
ENSMAUG00000001883	Dsel	1818482	1825090	101822676	dermatan sulfate epimerase like [Source:NCBI gene;Acc:101822676]	protein_coding			Dsel	101822676	ENSG00000171451	DSEL	92126	321.242	-0.00869812	0.166045	-0.0523842	0.958223	0.983565
ENSMAUG00000001884	Mrpl34	72945	73678	101836680	mitochondrial ribosomal protein L34 [Source:NCBI gene;Acc:101836680]	protein_coding			Mrpl34	101836680	ENSG00000130312	MRPL34	64981	1713.9	-0.142228	0.194157	-0.732539	0.46384	0.752684
ENSMAUG00000001886	E330021D16Rik	955	2076		RIKEN cDNA E330021D16 gene [Source:MGI Symbol;Acc:MGI:2141773]	protein_coding								286.512	-0.593857	0.169022	-3.51349	0.000442264	0.0575726
ENSMAUG00000001894	Npas1	1244458	1266527	101825713	neuronal PAS domain protein 1 [Source:NCBI gene;Acc:101825713]	protein_coding			Npas1	101825713	ENSG00000130751	NPAS1	4861	238.755	-0.249006	0.171145	-1.45495	0.145684	0.592664
ENSMAUG00000001896	Sord	1821622	1854021	101843575	sorbitol dehydrogenase [Source:NCBI gene;Acc:101843575]	protein_coding			Sord	101843575	ENSG00000140263	SORD	6652	692.572	-0.065873	0.161607	-0.407612	0.683558	0.863399
ENSMAUG00000001897	Lmntd2	57731692	57736242	101838442	lamin tail domain containing 2 [Source:NCBI gene;Acc:101838442]	protein_coding			Lmntd2	101838442	ENSG00000185522	LMNTD2	256329	24.6673	-0.375704	0.380991	-0.986124	0.324072	0.681294
ENSMAUG00000001898	Ppm1j	5394376	5399218	101837608	protein phosphatase, Mg2+/Mn2+ dependent 1J [Source:NCBI gene;Acc:101837608]	protein_coding			Ppm1j	101837608	ENSG00000155367	PPM1J	333926	285.563	-0.111552	0.246844	-0.451912	0.651332	0.848687
ENSMAUG00000001903	ACTG1	1478647	1479434	101839375	actin gamma 1 [Source:NCBI gene;Acc:101839375]	protein_coding				101839375	ENSG00000184009	ACTG1	71	27280	-0.128852	0.0889024	-1.44937	0.147234	0.593989
ENSMAUG00000001906	Zfp428	3183	3716	101832702	zinc finger protein 428 [Source:NCBI gene;Acc:101832702]	protein_coding			Zfp428	101832702	ENSG00000131116	ZNF428	126299	644.925	-0.221668	0.225149	-0.984542	0.324849	0.68216
ENSMAUG00000001907	Yeats2	10693036	10776355		YEATS domain containing 2 [Source:MGI Symbol;Acc:MGI:2447762]	protein_coding			Yeats2		ENSG00000163872	YEATS2	55689	795.743	0.081929	0.177714	0.461016	0.644787	0.845425
ENSMAUG00000001914	SEC14L1	4664849	4705909	101829966	SEC14 like lipid binding 1 [Source:NCBI gene;Acc:101829966]	protein_coding				101829966	ENSG00000129657	SEC14L1	6397	4631.01	-0.152968	0.121265	-1.26143	0.207152	0.621277
ENSMAUG00000001915	Plpp6	29796696	29797568	101833200	phospholipid phosphatase 6 [Source:NCBI gene;Acc:101833200]	protein_coding			Plpp6	101833200	ENSG00000205808	PLPP6	403313	498.996	0.139774	0.210175	0.665037	0.506027	0.778788
ENSMAUG00000001918	Col4a6	435498	724550	101840042	collagen type IV alpha 6 chain [Source:NCBI gene;Acc:101840042]	protein_coding			Col4a6	101840042	ENSG00000197565	COL4A6	1288	1109.26	0.364454	0.40111	0.908614	0.363554	0.699892
ENSMAUG00000001919	Atp6v0d2	23808060	23847639	101823171	ATPase H+ transporting V0 subunit d2 [Source:NCBI gene;Acc:101823171]	protein_coding			Atp6v0d2	101823171	ENSG00000147614	ATP6V0D2	245972	20.0018	-0.0411266	0.564267	-0.0728849	0.941898	0.977034
ENSMAUG00000001920	Qki	662874	757758		quaking [Source:MGI Symbol;Acc:MGI:97837]	protein_coding			Qk		ENSG00000112531	QKI	9444	1666.54	0.624214	0.470085	1.32788	0.184219	0.612769
ENSMAUG00000001928	Scgn	28060990	28095000	101823251	secretagogin, EF-hand calcium binding protein [Source:NCBI gene;Acc:101823251]	protein_coding			Scgn	101823251	ENSG00000079689	SCGN	10590	436.926	-0.198845	0.310094	-0.64124	0.521367	0.785052
ENSMAUG00000001929	Ap1s2	6771280	6794023	101825061	adaptor related protein complex 1 subunit sigma 2 [Source:NCBI gene;Acc:101825061]	protein_coding			Ap1s2	101825061	ENSG00000182287	AP1S2	8905	595.83	0.00246858	0.301566	0.00818588	0.993469	0.997479
ENSMAUG00000001931	Loxl3	10863131	10879759	101833175	lysyl oxidase like 3 [Source:NCBI gene;Acc:101833175]	protein_coding			Loxl3	101833175	ENSG00000115318	LOXL3	84695	1141.07	-0.0476834	0.19342	-0.246528	0.805273	0.91755
ENSMAUG00000001932	Plac9	1392623	1416532	101829217	placenta associated 9 [Source:NCBI gene;Acc:101829217]	protein_coding			Plac9a	101829217	ENSG00000189129	PLAC9	219348	1935.44	-0.0974665	0.301762	-0.322991	0.746702	0.892916
ENSMAUG00000001936	Inppl1	12561314	12574991	101841189	inositol polyphosphate phosphatase like 1 [Source:NCBI gene;Acc:101841189]	protein_coding			Inppl1	101841189	ENSG00000165458	INPPL1	3636	3915.78	-0.0834753	0.0751309	-1.11106	0.26654	0.65011
ENSMAUG00000001937	Id4	4739175	4744103	101838719	inhibitor of DNA binding 4, HLH protein [Source:NCBI gene;Acc:101838719]	protein_coding			Id4	101838719	ENSG00000172201	ID4	3400	1524.45	0.32444	0.234939	1.38095	0.167294	0.607348
ENSMAUG00000001938	Trim10	423616	433817	101843828	tripartite motif containing 10 [Source:NCBI gene;Acc:101843828]	protein_coding			Trim10	101843828	ENSG00000204613	TRIM10	10107	10.2904	1.16877	0.621705	1.87994	0.0601158	0.518934
ENSMAUG00000001943	Pde9a	1114960	1208174		phosphodiesterase 9A [Source:MGI Symbol;Acc:MGI:1277179]	protein_coding			Pde9a		ENSG00000160191	PDE9A	5152	900.142	-0.268259	0.209701	-1.27924	0.200812	0.619155
ENSMAUG00000001944	Ccdc81	363460	391669	101837433	coiled-coil domain containing 81 [Source:NCBI gene;Acc:101837433]	protein_coding			Ccdc81	101837433	ENSG00000149201	CCDC81	60494	278.008	0.0846027	0.377535	0.224092	0.822685	0.925212
ENSMAUG00000001946	Polr1d	4174921	4210334	101841925	RNA polymerase I and III subunit D [Source:NCBI gene;Acc:101841925]	protein_coding			Polr1d	101841925	ENSG00000186184	POLR1D	51082	3130.56	-0.0929088	0.165546	-0.561227	0.574643	0.813414
ENSMAUG00000001948	SH3PXD2B	172646	235237			protein_coding					ENSG00000174705	SH3PXD2B	285590	46.0206	0.73426	0.459445	1.59814	0.110011	0.568991
ENSMAUG00000001949	Stk32c	59595813	59675428	101827800	serine/threonine kinase 32C [Source:NCBI gene;Acc:101827800]	protein_coding			Stk32c	101827800	ENSG00000165752	STK32C	282974	39.9936	-0.19484	0.338339	-0.575874	0.564701	0.808364
ENSMAUG00000001954	Lrrc45	1090207	1098481	101835575	leucine rich repeat containing 45 [Source:NCBI gene;Acc:101835575]	protein_coding			Lrrc45	101835575	ENSG00000169683	LRRC45	201255	2819.47	0.00865495	0.207553	0.0416999	0.966738	0.987144
ENSMAUG00000001955	Vps8	18501115	18655092	101828804	VPS8 subunit of CORVET complex [Source:NCBI gene;Acc:101828804]	protein_coding			Vps8	101828804	ENSG00000156931	VPS8	23355	2770.41	0.0767737	0.129198	0.594231	0.552358	0.802163
ENSMAUG00000001957	Deup1	1519998	1572545	101826836	deuterosome assembly protein 1 [Source:NCBI gene;Acc:101826836]	protein_coding			Deup1	101826836	ENSG00000165325	DEUP1	159989	73.1164	0.00733608	0.393323	0.0186516	0.985119	0.994676
ENSMAUG00000001969	Nek3	275628	300745	101839712	NIMA related kinase 3 [Source:NCBI gene;Acc:101839712]	protein_coding			Nek3	101839712	ENSG00000136098	NEK3	4752	284.238	-0.04035	0.134585	-0.299811	0.764321	0.899022
ENSMAUG00000001970	Prokr1	4178415	4187858	101829334	prokineticin receptor 1 [Source:NCBI gene;Acc:101829334]	protein_coding								91.567	0.142423	0.335121	0.42499	0.670844	0.85698
ENSMAUG00000001971	Calca	4458308	4462789	101831320	calcitonin related polypeptide alpha [Source:NCBI gene;Acc:101831320]	protein_coding			Calca	101831320	ENSG00000110680	CALCA	796	117.893	0.438486	0.35636	1.23046	0.218526	0.62265
ENSMAUG00000001973	Bbs7	11619510	11656082		Bardet-Biedl syndrome 7 (human) [Source:MGI Symbol;Acc:MGI:1918742]	protein_coding			Bbs7		ENSG00000138686	BBS7	55212	234.911	0.123556	0.136216	0.907059	0.364375	0.700133
ENSMAUG00000001981	Frmpd1	4953565	5015404	101844681	FERM and PDZ domain containing 1 [Source:NCBI gene;Acc:101844681]	protein_coding			Frmpd1	101844681	ENSG00000070601	FRMPD1	22844	309.39	-0.0406279	0.195984	-0.207302	0.835774	0.931593
ENSMAUG00000001984	Stxbp5l	3321723	3572048	101823102	syntaxin binding protein 5 like [Source:NCBI gene;Acc:101823102]	protein_coding			Stxbp5l	101823102	ENSG00000145087	STXBP5L	9515	30.4674	-0.449894	0.848006	-0.530532	0.595743	0.823394
ENSMAUG00000001985	Mapk1ip1	59932923	59945144	101831172	MAPK-interacting and spindle-stabilizing protein-like [Source:NCBI gene;Acc:101831172]	protein_coding			Mapk1ip1	101831172	ENSG00000168175	MAPK1IP1L	93487	184.635	0.0678689	0.119805	0.566495	0.571057	0.811057
ENSMAUG00000001986	Zmat3	15741314	15764650	101843934	zinc finger matrin-type 3 [Source:NCBI gene;Acc:101843934]	protein_coding			Zmat3	101843934	ENSG00000172667	ZMAT3	64393	257.151	0.0254031	0.175979	0.144354	0.885221	0.953894
ENSMAUG00000001987	Arl6ip6	13550098	13567760	101823802	ADP ribosylation factor like GTPase 6 interacting protein 6 [Source:NCBI gene;Acc:101823802]	protein_coding			Arl6ip6	101823802	ENSG00000177917	ARL6IP6	151188	455.076	0.110713	0.158372	0.699069	0.484509	0.765529
ENSMAUG00000001988	Sowaha	23482447	23484105	101844797	sosondowah ankyrin repeat domain family member A [Source:NCBI gene;Acc:101844797]	protein_coding			Sowaha	101844797	ENSG00000198944	SOWAHA	134548	103.857	0.333748	0.233911	1.42682	0.153633	0.599554
ENSMAUG00000001989	Skp2	6527325	6549398	101837348	S-phase kinase associated protein 2 [Source:NCBI gene;Acc:101837348]	protein_coding			Skp2	101837348	ENSG00000145604	SKP2	6502	39.6142	0.330359	0.374445	0.882263	0.377635	0.709373
ENSMAUG00000001990	Tfec	1964201	2000098	101826652	transcription factor EC [Source:NCBI gene;Acc:101826652]	protein_coding			Tfec	101826652	ENSG00000105967	TFEC	22797	436.465	0.0344341	0.22984	0.149818	0.880908	0.951313
ENSMAUG00000001991	ZIK1	39	1184	101826081	zinc finger protein interacting with ribonucleoprotein K-like [Source:NCBI gene;Acc:101826081]	protein_coding				101826081	ENSG00000171649	ZIK1	284307	54.8504	0.392668	0.476063	0.824824	0.409472	0.724916
ENSMAUG00000002004	Etv3	4098487	4110229	101842813	ETS translocation variant 3 [Source:NCBI gene;Acc:101842813]	protein_coding			Etv3	101842813	ENSG00000117036	ETV3	2117	548.478	0.339144	0.428032	0.792334	0.428166	0.735786
ENSMAUG00000002005	Gpatch3	6768536	6777403	101828043	G-patch domain containing 3 [Source:NCBI gene;Acc:101828043]	protein_coding			Gpatch3	101828043	ENSG00000198746	GPATCH3	63906	760.931	-0.228468	0.148039	-1.5433	0.122757	0.576845
ENSMAUG00000002006	Mrpl12	1340834	1345600	101838573	mitochondrial ribosomal protein L12 [Source:NCBI gene;Acc:101838573]	protein_coding			Mrpl12	101838573	ENSG00000262814	MRPL12	6182	2270.81	-0.240645	0.170991	-1.40736	0.159321	0.602563
ENSMAUG00000002007	Rps6ka2	1338284	1463173	101837095	ribosomal protein S6 kinase A2 [Source:NCBI gene;Acc:101837095]	protein_coding			Rps6ka2	101837095	ENSG00000071242	RPS6KA2	6196	1832.32	-0.199045	0.123276	-1.61462	0.106392	0.567727
ENSMAUG00000002008	Tmem273	4822576	4852044	101843334	transmembrane protein 273 [Source:NCBI gene;Acc:101843334]	protein_coding			Tmem273	101843334	ENSG00000204161	TMEM273	170371	360.141	-0.160412	0.140222	-1.14398	0.25263	0.641496
ENSMAUG00000002009	YTHDF2	915	3550		YTH N6-methyladenosine RNA binding protein 2 [Source:MGI Symbol;Acc:MGI:2444233]	protein_coding					ENSG00000198492	YTHDF2	51441	836.745	0.0464996	0.0931843	0.499007	0.617774	0.834018
ENSMAUG00000002011	Selenof	3177628	3213025	101823413	selenoprotein F [Source:NCBI gene;Acc:101823413]	protein_coding			Selenof	101823413	ENSG00000183291	SELENOF	9403	8262.64	-0.0288491	0.0899447	-0.320743	0.748405	0.893083
ENSMAUG00000002013	Hdac5	18666637	18703763	101838211	histone deacetylase 5 [Source:NCBI gene;Acc:101838211]	protein_coding			Hdac5	101838211	ENSG00000108840	HDAC5	10014	8201.87	-0.291769	0.14848	-1.96504	0.0494091	0.503121
ENSMAUG00000002014	PRR15L	4559	4861	101839718	proline rich 15 like [Source:NCBI gene;Acc:101839718]	protein_coding				101839718	ENSG00000167183	PRR15L	79170	1222.02	-0.0403231	0.186261	-0.216487	0.828608	0.927118
ENSMAUG00000002015	Pole4	10492764	10498333	101831245	DNA polymerase epsilon 4, accessory subunit [Source:NCBI gene;Acc:101831245]	protein_coding			Pole4	101831245	ENSG00000115350	POLE4	56655	958.213	-0.16085	0.121334	-1.32567	0.184948	0.613354
ENSMAUG00000002016	Artn	3360502	3364048	101832755	artemin [Source:NCBI gene;Acc:101832755]	protein_coding			Artn	101832755	ENSG00000117407	ARTN	9048	18.7304	0.517599	0.546649	0.946857	0.343712	0.691161
ENSMAUG00000002017	ZNF236	31702191	31710824			protein_coding					ENSG00000130856	ZNF236	7776	11.0736	0.158578	0.618118	0.25655	0.797526	0.912256
ENSMAUG00000002019	Tlcd1	9278519	9280168	101831774	TLC domain containing 1 [Source:NCBI gene;Acc:101831774]	protein_coding			Tlcd1	101831774	ENSG00000160606	TLCD1	116238	585.358	-0.101127	0.259096	-0.390308	0.696309	0.869277
ENSMAUG00000002020	Mmel1	1426467	1453042	101840197	membrane metalloendopeptidase like 1 [Source:NCBI gene;Acc:101840197]	protein_coding			Mmel1	101840197	ENSG00000142606	MMEL1	79258	8.30711	0.985938	0.726919	1.35633	0.174996	0.611361
ENSMAUG00000002021	Fxr2	7495047	7518355	101833135	FMR1 autosomal homolog 2 [Source:NCBI gene;Acc:101833135]	protein_coding			Fxr2	101833135	ENSG00000129245	FXR2	9513	5257.5	-0.194205	0.0923068	-2.10391	0.0353862	0.469944
ENSMAUG00000002022	Clec4g	423653	427650	101836325	C-type lectin domain family 4 member G [Source:NCBI gene;Acc:101836325]	protein_coding			Clec4g	101836325	ENSG00000182566	CLEC4G	339390	32.6295	0.281703	0.511364	0.550884	0.581713	0.816716
ENSMAUG00000002027	Pla2r1	20678986	20799613	101831037	phospholipase A2 receptor 1 [Source:NCBI gene;Acc:101831037]	protein_coding			Pla2r1	101831037	ENSG00000153246	PLA2R1	22925	231.905	1.26453	0.48994	2.58098	0.00985198	0.3051
ENSMAUG00000002029	Zranb3	3588485	3730859	101844944	zinc finger RANBP2-type containing 3 [Source:NCBI gene;Acc:101844944]	protein_coding			Zranb3	101844944	ENSG00000121988	ZRANB3	84083	278.434	-0.042058	0.124773	-0.337076	0.736059	0.886892
ENSMAUG00000002030	Siah2	2982766	3007421	101835860	siah E3 ubiquitin protein ligase 2 [Source:NCBI gene;Acc:101835860]	protein_coding			Siah2	101835860	ENSG00000181788	SIAH2	6478	549.544	-0.0344515	0.0972643	-0.354205	0.723186	0.881437
ENSMAUG00000002031	Atg4b	10487185	10517205	101832470	autophagy related 4B cysteine peptidase [Source:NCBI gene;Acc:101832470]	protein_coding			Atg4b	101832470	ENSG00000168397	ATG4B	23192	2534.25	-0.13497	0.0805671	-1.67525	0.0938844	0.559352
ENSMAUG00000002032	Polb	238953	264887	101834160	DNA polymerase beta [Source:NCBI gene;Acc:101834160]	protein_coding			Polb	101834160	ENSG00000070501	POLB	5423	811.814	-0.170479	0.112828	-1.51097	0.130797	0.58005
ENSMAUG00000002034	Hrh4	22349237	22381457	101836079	histamine receptor H4 [Source:NCBI gene;Acc:101836079]	protein_coding			Hrh4	101836079	ENSG00000134489	HRH4	59340	7.35512	0.551927	0.699895	0.788586	0.430354	0.737132
ENSMAUG00000002035	Tmc4	3134413	3148884	101825786	transmembrane channel like 4 [Source:NCBI gene;Acc:101825786]	protein_coding			Tmc4	101825786	ENSG00000167608	TMC4	147798	4907.09	-0.203985	0.164813	-1.23768	0.215836	0.621679
ENSMAUG00000002036	Paox	58674277	58682015	101823694	polyamine oxidase [Source:NCBI gene;Acc:101823694]	protein_coding								949.567	-0.0789221	0.107484	-0.734266	0.462787	0.751556
ENSMAUG00000002037	VMA21	543855	552712	101823874	vacuolar ATPase assembly factor VMA21 [Source:NCBI gene;Acc:101823874]	protein_coding				101823874	ENSG00000160131	VMA21	203547	2053.06	0.188298	0.0793998	2.37151	0.0177155	0.37853
ENSMAUG00000002039	Hps6	13246737	13249157	101827711	HPS6 biogenesis of lysosomal organelles complex 2 subunit 3 [Source:NCBI gene;Acc:101827711]	protein_coding			Hps6	101827711	ENSG00000166189	HPS6	79803	1702.21	-0.0742323	0.134398	-0.552331	0.580721	0.816324
ENSMAUG00000002040	Pigm	9486604	9487875	101829098	phosphatidylinositol glycan anchor biosynthesis class M [Source:NCBI gene;Acc:101829098]	protein_coding			Pigm	101829098	ENSG00000143315	PIGM	93183	359.732	-0.0974656	0.146408	-0.665713	0.505595	0.77853
ENSMAUG00000002041	Uqcc4	1839493	1841590	101844950	chromosome unknown C16orf91 homolog [Source:NCBI gene;Acc:101844950]	protein_coding			BC003965	101844950	ENSG00000174109	C16orf91	283951	1065.31	-0.0751695	0.135233	-0.555853	0.578311	0.815079
ENSMAUG00000002042	App	12095049	12311767	101836288	amyloid beta precursor protein [Source:NCBI gene;Acc:101836288]	protein_coding			App	101836288	ENSG00000142192	APP	351	36742.1	0.107215	0.235853	0.454584	0.649408	0.848083
ENSMAUG00000002043	Phf1	175258	179169	101836938	PHD finger protein 1 [Source:NCBI gene;Acc:101836938]	protein_coding			Phf1	101836938	ENSG00000112511	PHF1	5252	7934.74	-0.204827	0.184336	-1.11116	0.2665	0.65011
ENSMAUG00000002044	Ropn1l	42488160	42497164	101840059	rhophilin associated tail protein 1 like [Source:NCBI gene;Acc:101840059]	protein_coding			Ropn1l	101840059	ENSG00000145491	ROPN1L	83853	570.702	0.158388	0.303753	0.521438	0.602062	0.826535
ENSMAUG00000002045	Cenpv	14411692	14428605		centromere protein V [Source:MGI Symbol;Acc:MGI:1920389]	protein_coding			Cenpv		ENSG00000166582	CENPV	201161	465.174	-0.311801	0.181886	-1.71426	0.0864806	0.548746
ENSMAUG00000002047	Ttpal	2712582	2730611	101828950	alpha tocopherol transfer protein like [Source:NCBI gene;Acc:101828950]	protein_coding			Ttpal	101828950	ENSG00000124120	TTPAL	79183	697.307	-0.0434229	0.0879809	-0.493549	0.621625	0.835841
ENSMAUG00000002050	Kcnt1	1440775	1496706	101842826	potassium sodium-activated channel subfamily T member 1 [Source:NCBI gene;Acc:101842826]	protein_coding			Kcnt1	101842826	ENSG00000107147	KCNT1	57582	4.78755	-0.9779	1.56652	-0.624251	0.532462	0.789967
ENSMAUG00000002052	Dennd4c	1302436	1396001	101844922	DENN domain containing 4C [Source:NCBI gene;Acc:101844922]	protein_coding			Dennd4c	101844922	ENSG00000137145	DENND4C	55667	1597.5	0.400508	0.159924	2.50437	0.0122671	0.337288
ENSMAUG00000002058	Hoxa5	565445	568328	101828597	homeobox A5 [Source:NCBI gene;Acc:101828597]	protein_coding			Hoxa5	101828597	ENSG00000106004	HOXA5	3202	2806.35	-0.438186	0.218365	-2.00667	0.0447847	0.486549
ENSMAUG00000002060	Ajap1	2897944	3013807	101843152	adherens junctions associated protein 1 [Source:NCBI gene;Acc:101843152]	protein_coding			Ajap1	101843152	ENSG00000196581	AJAP1	55966	92.1756	1.18784	0.66703	1.78079	0.0749467	0.535541
ENSMAUG00000002070	Gpx3	22077777	22085000	101840446	glutathione peroxidase 3 [Source:NCBI gene;Acc:101840446]	protein_coding			Gpx3	101840446	ENSG00000211445	GPX3	2878	6217.65	-0.108446	0.249883	-0.433988	0.664297	0.853491
ENSMAUG00000002074	Nphs1	5806370	5831320	101839599	NPHS1 adhesion molecule, nephrin [Source:NCBI gene;Acc:101839599]	protein_coding			Nphs1	101839599	ENSG00000161270	NPHS1	4868	6.15779	3.3859	1.52577	2.21914	0.0264771	0.436634
ENSMAUG00000002082	Mfsd11	4945050	4964368		major facilitator superfamily domain containing 11 [Source:MGI Symbol;Acc:MGI:1917150]	protein_coding			Mfsd11		ENSG00000092931	MFSD11	79157	1329.34	-0.00817652	0.0906845	-0.0901645	0.928156	0.971938
ENSMAUG00000002083	Myh15	6921926	7047740	101824177	myosin heavy chain 15 [Source:NCBI gene;Acc:101824177]	protein_coding			Myh15	101824177	ENSG00000144821	MYH15	22989	121.261	-0.164854	0.349311	-0.471941	0.636969	0.842154
ENSMAUG00000002084	Nid1	13490128	13570145	101829970	nidogen 1 [Source:NCBI gene;Acc:101829970]	protein_coding			Nid1	101829970	ENSG00000116962	NID1	4811	6947.18	-0.0688973	0.39915	-0.17261	0.862958	0.943239
ENSMAUG00000002085	SDHAF1	15	371	101832616	succinate dehydrogenase assembly factor 1, mitochondrial-like [Source:NCBI gene;Acc:101832616]	protein_coding				101832616	ENSG00000205138	SDHAF1	644096	592.123	-0.237098	0.180009	-1.31715	0.187788	0.614558
ENSMAUG00000002086	SON	6229961	6268464	101827847	SON DNA binding protein [Source:NCBI gene;Acc:101827847]	protein_coding				101827847	ENSG00000159140	SON	6651	3727.23	0.132414	0.0880732	1.50345	0.132723	0.581871
ENSMAUG00000002090	Sla	5655826	5705160	101828654	Src like adaptor [Source:NCBI gene;Acc:101828654]	protein_coding			Sla	101828654	ENSG00000155926	SLA	6503	2102.98	0.0490234	0.179656	0.272874	0.78495	0.908396
ENSMAUG00000002092	Laptm4a	4330580	4347857	101836733	lysosomal protein transmembrane 4 alpha [Source:NCBI gene;Acc:101836733]	protein_coding			Laptm4a	101836733	ENSG00000068697	LAPTM4A	9741	17941.7	-0.0945802	0.0868375	-1.08916	0.276082	0.656936
ENSMAUG00000002095	Gcnt1	41368267	41369553	106021036	glucosaminyl (N-acetyl) transferase 1 [Source:NCBI gene;Acc:106021036]	protein_coding			Gcnt1	106021036	ENSG00000187210	GCNT1	2650	175.35	1.51039	0.660737	2.28591	0.0222595	0.407411
ENSMAUG00000002096	Ypel5	8558037	8572041	101829616	yippee like 5 [Source:NCBI gene;Acc:101829616]	protein_coding			Ypel5	101829616	ENSG00000119801	YPEL5	51646	2175.34	-0.086962	0.113434	-0.766628	0.443303	0.741619
ENSMAUG00000002097	Olfm5	409043	415333	101826498	olfactomedin-4 [Source:NCBI gene;Acc:101826498]	protein_coding								2.38444	-4.23858	2.79973	-1.51393	0.130044	0.58005
ENSMAUG00000002098	1700109H08Rik	4251051	4270865		RIKEN cDNA 1700109H08 gene [Source:MGI Symbol;Acc:MGI:1924286]	protein_coding								94.9782	0.213118	0.327434	0.650873	0.515129	0.782666
ENSMAUG00000002099	Rasgrp1	6659647	6734218	101844509	RAS guanyl releasing protein 1 [Source:NCBI gene;Acc:101844509]	protein_coding			Rasgrp1	101844509	ENSG00000172575	RASGRP1	10125	555.607	-0.0391847	0.25873	-0.15145	0.879621	0.950626
ENSMAUG00000002103	Adora2b	14704812	14720189	101832697	adenosine A2b receptor [Source:NCBI gene;Acc:101832697]	protein_coding			Adora2b	101832697	ENSG00000170425	ADORA2B	136	312.445	-0.322426	0.234645	-1.3741	0.169409	0.607567
ENSMAUG00000002107	Drd4	57656980	57659971	101837477	dopamine receptor D4 [Source:NCBI gene;Acc:101837477]	protein_coding			Drd4	101837477	ENSG00000069696	DRD4	1815	36.5359	2.09224	0.696879	3.0023	0.00267945	0.180801
ENSMAUG00000002110	Msra	3983891	4278043	101833420	methionine sulfoxide reductase A [Source:NCBI gene;Acc:101833420]	protein_coding			Msra	101833420	ENSG00000175806	MSRA	4482	665.362	-0.221056	0.125269	-1.76465	0.077622	0.537298
ENSMAUG00000002111	Kifap3	12477102	12607527	101826178	kinesin associated protein 3 [Source:NCBI gene;Acc:101826178]	protein_coding			Kifap3	101826178	ENSG00000075945	KIFAP3	22920	2518.67	0.209766	0.113714	1.84468	0.0650839	0.525746
ENSMAUG00000002114	Rft1	330459	369747	101842740	RFT1 homolog [Source:NCBI gene;Acc:101842740]	protein_coding								389.959	0.263308	0.140033	1.88032	0.0600641	0.518934
ENSMAUG00000002118	Fstl1	2912009	2961053	101844023	follistatin like 1 [Source:NCBI gene;Acc:101844023]	protein_coding			Fstl1	101844023	ENSG00000163430	FSTL1	11167	6301.04	0.271081	0.190749	1.42114	0.155276	0.600293
ENSMAUG00000002119	OAS1	8002966	8025961	106021986	2'-5'-oligoadenylate synthase 1A-like [Source:NCBI gene;Acc:106021986]	protein_coding				106021986	ENSG00000089127	OAS1	4938	1823.06	1.79455	0.462518	3.87995	0.000104477	0.0207682
ENSMAUG00000002125	Commd10	12846303	12971467	101830857	COMM domain containing 10 [Source:NCBI gene;Acc:101830857]	protein_coding			Commd10	101830857	ENSG00000145781	COMMD10	51397	1258.82	0.00888219	0.0917617	0.0967962	0.922888	0.969335
ENSMAUG00000002126	Tmem63c	3045094	3113796	101838698	transmembrane protein 63C [Source:NCBI gene;Acc:101838698]	protein_coding			Tmem63c	101838698	ENSG00000165548	TMEM63C	57156	15.6519	-0.17633	0.514816	-0.342511	0.731967	0.885244
ENSMAUG00000002127	Stx11	18502450	18531446	101842212	syntaxin 11 [Source:NCBI gene;Acc:101842212]	protein_coding			Stx11	101842212	ENSG00000135604	STX11	8676	648.243	0.429697	0.232283	1.84988	0.0643304	0.525066
ENSMAUG00000002128	RPS24	78101942	78102343			protein_coding					ENSG00000138326	RPS24	6229	1687.6	-0.0525036	0.170233	-0.308422	0.757761	0.896683
ENSMAUG00000002133	Slit1	17620103	17770452	101825700	slit guidance ligand 1 [Source:NCBI gene;Acc:101825700]	protein_coding			Slit1	101825700	ENSG00000187122	SLIT1	6585	14.4217	-0.144195	0.618381	-0.233181	0.815621	0.922542
ENSMAUG00000002138	Nars2	7670221	7749524		asparaginyl-tRNA synthetase 2 (mitochondrial)(putative) [Source:MGI Symbol;Acc:MGI:2142075]	protein_coding			Nars2		ENSG00000137513	NARS2	79731	158.878	0.014353	0.140854	0.1019	0.918836	0.967987
ENSMAUG00000002139	Psrc1	8967820	8971700	101834997	proline and serine rich coiled-coil 1 [Source:NCBI gene;Acc:101834997]	protein_coding			Psrc1	101834997	ENSG00000134222	PSRC1	84722	97.6636	-0.303435	0.311429	-0.974332	0.329892	0.684444
ENSMAUG00000002140	Cyp4f40	4217255	4237262	101830370	cytochrome P450 4F4-like [Source:NCBI gene;Acc:101830370]	protein_coding			Cyp4f40	101830370	ENSG00000186115	CYP4F2	8529	221.036	0.915287	0.220039	4.15967	3.18711e-05	0.00732537
ENSMAUG00000002141	Ptprf	3003441	3072280	101828938	protein tyrosine phosphatase receptor type F [Source:NCBI gene;Acc:101828938]	protein_coding			Ptprf	101828938	ENSG00000142949	PTPRF	5792	15579.4	0.0276978	0.179752	0.154089	0.87754	0.950002
ENSMAUG00000002142	Ccdc3	1807377	1917011	101842099	coiled-coil domain containing 3 [Source:NCBI gene;Acc:101842099]	protein_coding			Ccdc3	101842099	ENSG00000151468	CCDC3	83643	215.968	0.497512	0.505236	0.984712	0.324766	0.682082
ENSMAUG00000002147	Tgfbr2	11150681	11240626	101841725	transforming growth factor beta receptor 2 [Source:NCBI gene;Acc:101841725]	protein_coding			Tgfbr2	101841725	ENSG00000163513	TGFBR2	7048	16084.1	0.134691	0.138939	0.969432	0.33233	0.686645
ENSMAUG00000002151	Eif4e2	5404745	5433002	101843796	eukaryotic translation initiation factor 4E family member 2 [Source:NCBI gene;Acc:101843796]	protein_coding			Eif4e2	101843796	ENSG00000135930	EIF4E2	9470	3074.84	-0.0914686	0.11768	-0.777264	0.437003	0.740333
ENSMAUG00000002152	Asb7	3862053	3908881	101827882	ankyrin repeat and SOCS box containing 7 [Source:NCBI gene;Acc:101827882]	protein_coding			Asb7	101827882	ENSG00000183475	ASB7	140460	647.046	0.192359	0.17225	1.11674	0.264104	0.649444
ENSMAUG00000002155	Aldh1b1	4396714	4401439	101842889	aldehyde dehydrogenase 1 family member B1 [Source:NCBI gene;Acc:101842889]	protein_coding			Aldh1b1	101842889	ENSG00000137124	ALDH1B1	219	156.526	0.0971017	0.235075	0.413068	0.679557	0.861526
ENSMAUG00000002156	Syngr1	2340423	2378073	101833475	synaptogyrin 1 [Source:NCBI gene;Acc:101833475]	protein_coding			Syngr1	101833475	ENSG00000100321	SYNGR1	9145	350.462	-0.0887982	0.267025	-0.332546	0.739477	0.888585
ENSMAUG00000002158	ENO1	16629495	16630798			protein_coding					ENSG00000074800	ENO1	2023	2707.6	-0.210863	0.108089	-1.95083	0.0510768	0.508572
ENSMAUG00000002162	Cirbp	2029686	2033963	101834929	cold inducible RNA binding protein [Source:NCBI gene;Acc:101834929]	protein_coding			Cirbp	101834929	ENSG00000099622	CIRBP	1153	8801.91	0.195874	0.206645	0.947874	0.343193	0.691085
ENSMAUG00000002164	Col8a1	5598593	5605811	101840286	collagen type VIII alpha 1 chain [Source:NCBI gene;Acc:101840286]	protein_coding			Col8a1	101840286	ENSG00000144810	COL8A1	1295	73.918	1.16893	0.44606	2.62057	0.00877822	0.296717
ENSMAUG00000002165	Tor1a	1625957	1633108	101831096	torsin family 1 member A [Source:NCBI gene;Acc:101831096]	protein_coding			Tor1a	101831096	ENSG00000136827	TOR1A	1861	1924.74	-0.147044	0.0946439	-1.55365	0.120268	0.575703
ENSMAUG00000002166	Ranbp6	28936163	28939480	101828763	RAN binding protein 6 [Source:NCBI gene;Acc:101828763]	protein_coding			Ranbp6	101828763	ENSG00000137040	RANBP6	26953	397.888	0.171875	0.30184	0.569423	0.569069	0.810281
ENSMAUG00000002168	Wdsub1	20109492	20152051	101830147	WD repeat, sterile alpha motif and U-box domain containing 1 [Source:NCBI gene;Acc:101830147]	protein_coding			Wdsub1	101830147	ENSG00000196151	WDSUB1	151525	484.574	-0.052537	0.0916228	-0.573405	0.566371	0.808967
ENSMAUG00000002171	Fgg	12731720	12738956	101832727	fibrinogen gamma chain [Source:NCBI gene;Acc:101832727]	protein_coding			Fgg	101832727	ENSG00000171557	FGG	2266	881.287	-0.0320994	0.268466	-0.119566	0.904827	0.96263
ENSMAUG00000002172	Ccdc159	8264031	8270306	101841285	coiled-coil domain containing 159 [Source:NCBI gene;Acc:101841285]	protein_coding			Ccdc159	101841285	ENSG00000183401	CCDC159	126075	532.089	-0.003395	0.291744	-0.0116369	0.990715	0.996814
ENSMAUG00000002176	Cdc14b	9059760	9132132		CDC14 cell division cycle 14B [Source:MGI Symbol;Acc:MGI:2441808]	protein_coding								148.334	0.383758	0.357199	1.07435	0.282664	0.65937
ENSMAUG00000002181	Boc	2726223	2791677	101839388	BOC cell adhesion associated, oncogene regulated [Source:NCBI gene;Acc:101839388]	protein_coding			Boc	101839388	ENSG00000144857	BOC	91653	1379.02	0.0232206	0.23628	0.0982757	0.921713	0.968734
ENSMAUG00000002188	Cox10	12931240	13038180	101829317	protoheme IX farnesyltransferase, mitochondrial [Source:NCBI gene;Acc:101829317]	protein_coding			Cox10	101829317	ENSG00000006695	COX10	1352	602.043	-0.273082	0.0817535	-3.34031	0.000836844	0.091185
ENSMAUG00000002192	Kndc1	58842458	58890904	101826218	kinase non-catalytic C-lobe domain containing 1 [Source:NCBI gene;Acc:101826218]	protein_coding			Kndc1	101826218	ENSG00000171798	KNDC1	85442	818.401	0.140845	0.343193	0.410397	0.681515	0.862439
ENSMAUG00000002195	Bms1	5280453	5320244	101835735	BMS1 ribosome biogenesis factor [Source:NCBI gene;Acc:101835735]	protein_coding			Bms1	101835735	ENSG00000165733	BMS1	9790	2462.41	-0.0291763	0.0583273	-0.500217	0.616922	0.833633
ENSMAUG00000002201	JMJD1C	11662157	11698297			protein_coding					ENSG00000171988	JMJD1C	221037	1321.9	0.316292	0.199561	1.58493	0.112981	0.569642
ENSMAUG00000002203	Dhdh	1321995	1331913		dihydrodiol dehydrogenase (dimeric) [Source:MGI Symbol;Acc:MGI:1919005]	protein_coding					ENSG00000104808	DHDH	27294	197.394	-0.00830159	0.215939	-0.0384441	0.969334	0.988282
ENSMAUG00000002211	Tnk1	7285695	7290768	101840790	tyrosine kinase non receptor 1 [Source:NCBI gene;Acc:101840790]	protein_coding			Tnk1	101840790	ENSG00000174292	TNK1	8711	1209.77	-0.0847612	0.171135	-0.495289	0.620396	0.835181
ENSMAUG00000002214	FAM107B	3157860	3173353	101844484	family with sequence similarity 107 member B [Source:NCBI gene;Acc:101844484]	protein_coding				101844484	ENSG00000065809	FAM107B	83641	3233.99	0.0562138	0.161318	0.348465	0.727491	0.883317
ENSMAUG00000002217	SLC25A5	3595637	3597195			protein_coding					ENSG00000005022	SLC25A5	292	4801.53	-0.0936245	0.0748367	-1.25105	0.210916	0.621679
ENSMAUG00000002219	PRKN	1593360	1627311			protein_coding					ENSG00000185345	PRKN	5071	381.364	0.131031	0.141988	0.922835	0.356093	0.696282
ENSMAUG00000002222	Itga11	9030341	9125711	101834992	integrin subunit alpha 11 [Source:NCBI gene;Acc:101834992]	protein_coding			Itga11	101834992	ENSG00000137809	ITGA11	22801	56.748	0.122654	0.63184	0.194122	0.84608	0.93604
ENSMAUG00000002228	Thoc7	10215397	10241128	101834823	THO complex 7 [Source:NCBI gene;Acc:101834823]	protein_coding			Thoc7	101834823	ENSG00000163634	THOC7	80145	1454.04	-0.0267449	0.138051	-0.193732	0.846386	0.93604
ENSMAUG00000002232	Wrap73	2205264	2219244	101842091	WD repeat containing, antisense to TP73 [Source:NCBI gene;Acc:101842091]	protein_coding			Wrap73	101842091	ENSG00000116213	WRAP73	49856	595.148	-0.234527	0.133736	-1.75366	0.0794888	0.539252
ENSMAUG00000002236	Znhit2	51085958	51087157	101824831	zinc finger HIT-type containing 2 [Source:NCBI gene;Acc:101824831]	protein_coding			Znhit2	101824831	ENSG00000174276	ZNHIT2	741	735.35	-0.117435	0.185591	-0.632759	0.526891	0.787668
ENSMAUG00000002237	Slc7a3	6873894	6880011	101844851	solute carrier family 7 member 3 [Source:NCBI gene;Acc:101844851]	protein_coding			Slc7a3	101844851	ENSG00000165349	SLC7A3	84889	16.0483	-0.239062	0.353095	-0.677047	0.498376	0.774795
ENSMAUG00000002239	STOX1	15778703	15826031			protein_coding					ENSG00000165730	STOX1	219736	11.9092	0.764402	0.63922	1.19584	0.231761	0.629497
ENSMAUG00000002240	DZANK1	19354052	19366628			protein_coding					ENSG00000089091	DZANK1	55184	12.7783	0.268473	0.600926	0.446766	0.655044	0.849634
ENSMAUG00000002250	Cox8b	58059906	58061383	101827967	cytochrome c oxidase subunit 8B, mitochondrial [Source:NCBI gene;Acc:101827967]	protein_coding								73.1449	-0.200362	0.856952	-0.233808	0.815134	0.92226
ENSMAUG00000002256	RPL11	1572088	1572605			protein_coding					ENSG00000142676	RPL11	6135	22.1145	-0.354252	0.333813	-1.06123	0.288586	0.660562
ENSMAUG00000002257	Prr11	321210	330789		proline rich 11 [Source:MGI Symbol;Acc:MGI:2444496]	protein_coding			Prr11		ENSG00000068489	PRR11	55771	21.996	-0.440329	0.398706	-1.10439	0.269423	0.652582
ENSMAUG00000002259	Mxra8	442953	448226	101835959	matrix remodeling associated 8 [Source:NCBI gene;Acc:101835959]	protein_coding			Mxra8	101835959	ENSG00000162576	MXRA8	54587	3423.52	0.062777	0.274255	0.2289	0.818946	0.923827
ENSMAUG00000002263	Rbm28	9983578	10018050	101837615	RNA binding motif protein 28 [Source:NCBI gene;Acc:101837615]	protein_coding			Rbm28	101837615	ENSG00000106344	RBM28	55131	2063.8	-0.0803112	0.0600277	-1.3379	0.180928	0.611828
ENSMAUG00000002264	Arhgap22	4263916	4412928	101828385	Rho GTPase activating protein 22 [Source:NCBI gene;Acc:101828385]	protein_coding			Arhgap22	101828385	ENSG00000128805	ARHGAP22	58504	980.425	0.00804581	0.277781	0.0289645	0.976893	0.991588
ENSMAUG00000002276	NGF	3088029	3088424			protein_coding					ENSG00000134259	NGF	4803	5.15002	0.254745	0.700321	0.363755	0.716041	0.877677
ENSMAUG00000002277	Pfdn4	4456066	4464024	101826714	prefoldin subunit 4 [Source:NCBI gene;Acc:101826714]	protein_coding			Pfdn4	101826714	ENSG00000101132	PFDN4	5203	1441.66	0.0380199	0.178991	0.212413	0.831785	0.928624
ENSMAUG00000002278	Cul2	2819497	2861927	101834411	cullin 2 [Source:NCBI gene;Acc:101834411]	protein_coding			Cul2	101834411	ENSG00000108094	CUL2	8453	1320.86	0.0243192	0.077198	0.315023	0.752744	0.894188
ENSMAUG00000002281	Pde6a	12433605	12493611	101838765	phosphodiesterase 6A [Source:NCBI gene;Acc:101838765]	protein_coding			Pde6a	101838765	ENSG00000132915	PDE6A	5145	42.248	0.0211182	0.473288	0.0446203	0.96441	0.98631
ENSMAUG00000002282	PRSS45P	6221401	6227480			protein_coding					ENSG00000188086	PRSS45P		9.19491	0.866865	0.898216	0.965096	0.334497	0.687072
ENSMAUG00000002283	Dusp11	282961	295168	101828801	dual specificity phosphatase 11 [Source:NCBI gene;Acc:101828801]	protein_coding			Dusp11	101828801	ENSG00000144048	DUSP11	8446	943.962	-0.245017	0.18829	-1.30128	0.193163	0.615704
ENSMAUG00000002284	Cfap107	9472671	9489555	101834392	chromosome unknown C1orf158 homolog [Source:NCBI gene;Acc:101834392]	protein_coding			1700012P22Rik	101834392	ENSG00000157330	C1orf158	93190	31.7257	-0.0515945	0.611362	-0.0843927	0.932744	0.973278
ENSMAUG00000002285	Cd248	52095974	52098262	101839243	CD248 molecule [Source:NCBI gene;Acc:101839243]	protein_coding			Cd248	101839243	ENSG00000174807	CD248	57124	1152.28	0.359603	0.218319	1.64715	0.0995279	0.562567
ENSMAUG00000002288	Cnga2	311474	317649	101823343	cyclic nucleotide gated channel subunit alpha 2 [Source:NCBI gene;Acc:101823343]	protein_coding			Cnga2	101823343	ENSG00000183862	CNGA2	1260	1817.75	-0.0989198	0.175672	-0.563094	0.573371	0.812395
ENSMAUG00000002294	Ror2	588471	757574	101831369	receptor tyrosine kinase like orphan receptor 2 [Source:NCBI gene;Acc:101831369]	protein_coding			Ror2	101831369	ENSG00000169071	ROR2	4920	966.694	0.114927	0.253139	0.454009	0.649823	0.848214
ENSMAUG00000002295	Fam20c	6680384	6732792	101832918	FAM20C golgi associated secretory pathway kinase [Source:NCBI gene;Acc:101832918]	protein_coding			Fam20c	101832918	ENSG00000177706	FAM20C	56975	1170.26	0.0753356	0.208317	0.36164	0.717621	0.878496
ENSMAUG00000002297	Smim24	819581	824105	101841123	small integral membrane protein 24 [Source:NCBI gene;Acc:101841123]	protein_coding			Smim24	101841123	ENSG00000095932	SMIM24	284422	86.1784	-0.36046	0.253118	-1.42408	0.154424	0.599651
ENSMAUG00000002298	ZNF3	8237912	8246017	101838348	zinc finger protein 3 [Source:NCBI gene;Acc:101838348]	protein_coding				101838348	ENSG00000166526	ZNF3	7551	350.148	0.112445	0.11385	0.987653	0.323323	0.680787
ENSMAUG00000002302	Nsa2	16310503	16317528	101842925	NSA2 ribosome biogenesis factor [Source:NCBI gene;Acc:101842925]	protein_coding			Nsa2	101842925	ENSG00000164346	NSA2	10412	3135.33	-0.0663584	0.0895426	-0.741082	0.458644	0.749784
ENSMAUG00000002307	Cep164	8321609	8390106		centrosomal protein 164 [Source:MGI Symbol;Acc:MGI:2384878]	protein_coding			Cep164		ENSG00000110274	CEP164	22897	929.476	0.115544	0.13406	0.861883	0.388752	0.714602
ENSMAUG00000002308	Calhm6	8952340	8954464	101838939	calcium homeostasis modulator family member 6 [Source:NCBI gene;Acc:101838939]	protein_coding			Calhm6	101838939	ENSG00000188820	CALHM6	441168	1343.67	1.38138	0.466174	2.96323	0.00304427	0.18548
ENSMAUG00000002309	Plpp7	167541	168176		phospholipid phosphatase 7 (inactive) [Source:MGI Symbol;Acc:MGI:2445183]	protein_coding			Plpp7		ENSG00000160539	PLPP7	84814	34.9742	-0.271673	0.257429	-1.05533	0.291273	0.661128
ENSMAUG00000002311	H2aj	4308622	4309813		H2J.A histone [Source:MGI Symbol;Acc:MGI:3606192]	protein_coding			H2aj		ENSG00000246705	H2AJ	55766	8656.93	-0.284072	0.203335	-1.39706	0.162396	0.605384
ENSMAUG00000002313	Fundc1	835326	850345	101824554	FUN14 domain containing 1 [Source:NCBI gene;Acc:101824554]	protein_coding			Fundc1	101824554	ENSG00000069509	FUNDC1	139341	864.77	0.216275	0.119501	1.80982	0.070324	0.529659
ENSMAUG00000002319	Mrgprg	55447707	55448579	101841845	MAS related GPR family member G [Source:NCBI gene;Acc:101841845]	protein_coding			Mrgprg	101841845	ENSG00000182170	MRGPRG	386746	3.02339	2.94716	2.05331	1.43532	0.151195	0.596511
ENSMAUG00000002324	Ubxn4	3431318	3465075		UBX domain protein 4 [Source:MGI Symbol;Acc:MGI:1915062]	protein_coding			Ubxn4		ENSG00000144224	UBXN4	23190	2462.85	0.0232105	0.0760739	0.305105	0.760286	0.89776
ENSMAUG00000002326	Gdf10	3666526	3678592	101826813	growth differentiation factor 10 [Source:NCBI gene;Acc:101826813]	protein_coding			Gdf10	101826813	ENSG00000266524	GDF10	2662	138.539	-0.123548	0.312522	-0.395324	0.692604	0.867693
ENSMAUG00000002337	Tph1	74160	91381		tryptophan hydroxylase 1 [Source:MGI Symbol;Acc:MGI:98796]	protein_coding			Tph1		ENSG00000129167	TPH1	7166	5.01214	0.164145	0.761104	0.215667	0.829247	0.927221
ENSMAUG00000002340	Wnt10a	4109340	4121150	101841882	Wnt family member 10A [Source:NCBI gene;Acc:101841882]	protein_coding			Wnt10a	101841882	ENSG00000135925	WNT10A	80326	21.1134	-0.948625	0.605911	-1.56562	0.117438	0.57294
ENSMAUG00000002347	Tmem213	5797891	5804585	101823052	transmembrane protein 213 [Source:NCBI gene;Acc:101823052]	protein_coding			Tmem213	101823052	ENSG00000214128	TMEM213	155006	9.08391	-1.1528	0.723293	-1.59383	0.110975	0.568991
ENSMAUG00000002351	Spef1l	58804487	58810270		sperm flagellar 1 like [Source:MGI Symbol;Acc:MGI:2685939]	protein_coding								35.2591	0.591562	0.48646	1.21606	0.223964	0.625846
ENSMAUG00000002352	Sepsecs	1904039	1931099	101844273	Sep (O-phosphoserine) tRNA:Sec (selenocysteine) tRNA synthase [Source:NCBI gene;Acc:101844273]	protein_coding			Sepsecs	101844273	ENSG00000109618	SEPSECS	51091	458.604	0.0642205	0.0928851	0.691397	0.489316	0.769411
ENSMAUG00000002355	Bahd1	5029501	5038161	101841035	bromo adjacent homology domain containing 1 [Source:NCBI gene;Acc:101841035]	protein_coding			Bahd1	101841035	ENSG00000140320	BAHD1	22893	2714.57	-0.118968	0.0831146	-1.43138	0.152322	0.598029
ENSMAUG00000002356	Thoc2	4444899	4566295	101824274	THO complex 2 [Source:NCBI gene;Acc:101824274]	protein_coding			Thoc2	101824274	ENSG00000125676	THOC2	57187	1926.87	0.0419192	0.144273	0.290556	0.771391	0.902126
ENSMAUG00000002358	ZNF34	1009246	1014013			protein_coding					ENSG00000196378	ZNF34	80778	12.8239	0.573205	0.651992	0.879159	0.379315	0.710785
ENSMAUG00000002359	NME1-NME2	6469540	6485808	101838863	nucleoside diphosphate kinase B [Source:NCBI gene;Acc:101838863]	protein_coding			Gm20390	101838863	ENSG00000011052	NME1-NME2	654364	8705.11	-0.262059	0.184791	-1.41814	0.156149	0.601566
ENSMAUG00000002366	Tcaf2	3782627	3798027		TRPM8 channel-associated factor 2 [Source:MGI Symbol;Acc:MGI:2385258]	protein_coding								317.534	0.195076	0.252808	0.771637	0.440329	0.740995
ENSMAUG00000002367	Hdac10	11196069	11201390	101826338	histone deacetylase 10 [Source:NCBI gene;Acc:101826338]	protein_coding			Hdac10	101826338	ENSG00000100429	HDAC10	83933	645.844	-0.106342	0.237677	-0.447424	0.654569	0.849593
ENSMAUG00000002369	Adamts13	250269	281640	101827371	ADAM metallopeptidase with thrombospondin type 1 motif 13 [Source:NCBI gene;Acc:101827371]	protein_coding			Adamts13	101827371	ENSG00000160323	ADAMTS13	11093	782.428	-0.37282	0.290335	-1.2841	0.199106	0.619155
ENSMAUG00000002370	Eif4enif1	21906252	21948781		eukaryotic translation initiation factor 4E nuclear import factor 1 [Source:MGI Symbol;Acc:MGI:1921453]	protein_coding			Eif4enif1		ENSG00000184708	EIF4ENIF1	56478	1725.24	0.083411	0.0810257	1.02944	0.303274	0.669821
ENSMAUG00000002371	Ugt2a1	9997257	10037518		UDP glucuronosyltransferase 2 family, polypeptide A1 [Source:MGI Symbol;Acc:MGI:2149905]	protein_coding					ENSG00000173610	UGT2A1	10941	40.6025	-6.15848	2.37309	-2.59513	0.00945548	0.303112
ENSMAUG00000002377	P2RX4	6223627	6236500			protein_coding					ENSG00000135124	P2RX4	5025	1552.22	-0.00449981	0.149116	-0.0301766	0.975926	0.991181
ENSMAUG00000002378	Mmp17	38457	58992	101834213	matrix metallopeptidase 17 [Source:NCBI gene;Acc:101834213]	protein_coding			Mmp17	101834213	ENSG00000198598	MMP17	4326	101.49	-0.293527	0.212022	-1.38442	0.166231	0.607059
ENSMAUG00000002379	Crim1	13585047	13779024	101834983	cysteine rich transmembrane BMP regulator 1 [Source:NCBI gene;Acc:101834983]	protein_coding			Crim1	101834983	ENSG00000150938	CRIM1	51232	3464.49	0.638019	0.474329	1.3451	0.178593	0.611361
ENSMAUG00000002381	TCTA	451	2934	101843199	T cell leukemia translocation altered [Source:NCBI gene;Acc:101843199]	protein_coding				101843199	ENSG00000145022	TCTA	6988	1391.12	0.0720651	0.0914503	0.788025	0.430682	0.737267
ENSMAUG00000002385	Amz2	12161858	12187359	101834972	archaelysin family metallopeptidase 2 [Source:NCBI gene;Acc:101834972]	protein_coding			Amz2	101834972	ENSG00000196704	AMZ2	51321	1020.55	0.0962819	0.0891008	1.0806	0.279877	0.657989
ENSMAUG00000002386	Fam122a	34325140	34326000	101837376	family with sequence similarity 122A [Source:NCBI gene;Acc:101837376]	protein_coding			Fam122a	101837376	ENSG00000187866	PABIR1	116224	668.645	0.0166227	0.091048	0.182571	0.855135	0.9398
ENSMAUG00000002390	Rnf148	4590726	4591676	101832647	RING finger protein 148 [Source:NCBI gene;Acc:101832647]	protein_coding			Rnf148	101832647	ENSG00000235631	RNF148	378925	5.87091	0.828737	0.733048	1.13054	0.25825	0.645078
ENSMAUG00000002392	Dars2	9970992	9996356		aspartyl-tRNA synthetase 2 (mitochondrial) [Source:MGI Symbol;Acc:MGI:2442510]	protein_coding			Dars2		ENSG00000117593	DARS2	55157	315.152	-0.0345847	0.086422	-0.400183	0.689021	0.865323
ENSMAUG00000002395	Sema4b	5643423	5666745	101826547	semaphorin 4B [Source:NCBI gene;Acc:101826547]	protein_coding			Sema4b	101826547	ENSG00000185033	SEMA4B	10509	1983.42	-0.180117	0.159408	-1.12991	0.258515	0.645191
ENSMAUG00000002396	Fam72a	258095	270999	101838155	family with sequence similarity 72 member A [Source:NCBI gene;Acc:101838155]	protein_coding								41.9638	0.279193	0.292321	0.95509	0.339532	0.688523
ENSMAUG00000002399	Cfap141	6647614	6664839	106021950	chromosome unknown C1orf189 homolog [Source:NCBI gene;Acc:106021950]	protein_coding			1700094D03Rik	106021950	ENSG00000163263	C1orf189	388701	543.222	0.222429	0.30603	0.726821	0.467336	0.75503
ENSMAUG00000002400	C2cd3	11003159	11111485		C2 calcium-dependent domain containing 3 [Source:MGI Symbol;Acc:MGI:2142166]	protein_coding			C2cd3		ENSG00000168014	C2CD3	26005	751.029	0.214142	0.165435	1.29441	0.195522	0.617599
ENSMAUG00000002407	Gal3st1	22741811	22763162	101833740	galactose-3-O-sulfotransferase 1 [Source:NCBI gene;Acc:101833740]	protein_coding			Gal3st1	101833740	ENSG00000128242	GAL3ST1	9514	552.895	-0.465903	0.24319	-1.9158	0.0553906	0.510703
ENSMAUG00000002409	Bmf	5417283	5433684	101843267	Bcl2 modifying factor [Source:NCBI gene;Acc:101843267]	protein_coding			Bmf	101843267	ENSG00000104081	BMF	90427	221.348	-0.0485603	0.214795	-0.226078	0.821141	0.924879
ENSMAUG00000002410	Trim3	347879	369189	101824770	tripartite motif containing 3 [Source:NCBI gene;Acc:101824770]	protein_coding			Trim3	101824770	ENSG00000110171	TRIM3	10612	6777.74	0.251308	0.200494	1.25344	0.210044	0.621679
ENSMAUG00000002411	Ints13	13829293	13851930		integrator complex subunit 13 [Source:MGI Symbol;Acc:MGI:1918427]	protein_coding			Ints13		ENSG00000064102	INTS13	55726	1245.29	-0.0690925	0.100196	-0.689575	0.490461	0.770224
ENSMAUG00000002413	Pdha1	10662757	10677349	101830244	pyruvate dehydrogenase E1 subunit alpha 1 [Source:NCBI gene;Acc:101830244]	protein_coding			Pdha1	101830244	ENSG00000131828	PDHA1	5160	2267.22	0.326605	0.267305	1.22184	0.221767	0.624934
ENSMAUG00000002414	Myo1f	4480192	4523211	101843518	myosin IF [Source:NCBI gene;Acc:101843518]	protein_coding			Myo1f	101843518	ENSG00000142347	MYO1F	4542	5461.63	-0.249719	0.269136	-0.927857	0.353482	0.694797
ENSMAUG00000002417	Zfp511	58761421	58765467	101825176	zinc finger protein 511 [Source:NCBI gene;Acc:101825176]	protein_coding			Zfp511	101825176	ENSG00000198546	ZNF511	118472	1384.89	-0.271201	0.148284	-1.82892	0.067411	0.525807
ENSMAUG00000002422	Bbs9	7248422	7669844		Bardet-Biedl syndrome 9 (human) [Source:MGI Symbol;Acc:MGI:2442833]	protein_coding			Bbs9		ENSG00000122507	BBS9	27241	429.924	-0.106846	0.104656	-1.02093	0.30729	0.672953
ENSMAUG00000002425	Rab8a	334918	353161	101830835	RAB8A, member RAS oncogene family [Source:NCBI gene;Acc:101830835]	protein_coding			Rab8a	101830835	ENSG00000167461	RAB8A	4218	5653.64	-0.118643	0.125416	-0.945992	0.344152	0.691313
ENSMAUG00000002426	Fjx1	21393054	21394409	101828770	four-jointed box kinase 1 [Source:NCBI gene;Acc:101828770]	protein_coding			Fjx1	101828770	ENSG00000179431	FJX1	24147	289.484	-0.136625	0.301347	-0.453381	0.650274	0.84829
ENSMAUG00000002427	Csrnp3	58163412	58352315	101823698	cysteine and serine rich nuclear protein 3 [Source:NCBI gene;Acc:101823698]	protein_coding			Csrnp3	101823698	ENSG00000178662	CSRNP3	80034	3.89706	-0.122364	0.951894	-0.128548	0.897715	0.95993
ENSMAUG00000002429	Gamt	1953600	1956192	101833877	guanidinoacetate N-methyltransferase [Source:NCBI gene;Acc:101833877]	protein_coding			Gamt	101833877	ENSG00000130005	GAMT	2593	564.39	-0.172384	0.20053	-0.859644	0.389985	0.714819
ENSMAUG00000002430	Irak1	534054	544010	101830300	interleukin 1 receptor associated kinase 1 [Source:NCBI gene;Acc:101830300]	protein_coding			Irak1	101830300	ENSG00000184216	IRAK1	3654	3260.94	0.0634183	0.0691984	0.916471	0.35942	0.698147
ENSMAUG00000002432	RNF214	8458887	8471125	101839197	ring finger protein 214 [Source:NCBI gene;Acc:101839197]	protein_coding				101839197	ENSG00000167257	RNF214	257160	380.566	0.23032	0.199196	1.15624	0.247581	0.639577
ENSMAUG00000002434	Qsox2	1098196	1126484	101841303	quiescin sulfhydryl oxidase 2 [Source:NCBI gene;Acc:101841303]	protein_coding			Qsox2	101841303	ENSG00000165661	QSOX2	169714	1395.6	0.0928735	0.13511	0.68739	0.491837	0.771314
ENSMAUG00000002440	AK6	12906943	12911659			protein_coding					ENSG00000085231	AK6	102157402	460.775	-0.128532	0.116067	-1.10739	0.268123	0.651289
ENSMAUG00000002443	Hsph1	1705638	1725206	101838084	heat shock protein family H (Hsp110) member 1 [Source:NCBI gene;Acc:101838084]	protein_coding			Hsph1	101838084	ENSG00000120694	HSPH1	10808	4674.35	-0.262493	0.298715	-0.878741	0.379541	0.71079
ENSMAUG00000002444	Pik3r3	5704386	5784369		phosphoinositide-3-kinase regulatory subunit 3 [Source:MGI Symbol;Acc:MGI:109277]	protein_coding								100.572	0.418312	0.43575	0.959981	0.337065	0.687437
ENSMAUG00000002446	Msx3	58750976	58752698	101824909	VENT homeobox [Source:NCBI gene;Acc:101824909]	protein_coding								35.6985	-0.598328	0.494289	-1.21048	0.226094	0.626104
ENSMAUG00000002447	Supt3	8819745	9162162	101835159	SPT3 homolog, SAGA and STAGA complex component [Source:NCBI gene;Acc:101835159]	protein_coding			Supt3	101835159	ENSG00000196284	SUPT3H	8464	321.742	-0.167322	0.187659	-0.891629	0.372592	0.706002
ENSMAUG00000002449	Foxm1	3293887	3310451	101837199	forkhead box M1 [Source:NCBI gene;Acc:101837199]	protein_coding			Foxm1	101837199	ENSG00000111206	FOXM1	2305	607.777	-0.22184	0.130237	-1.70336	0.0885009	0.549731
ENSMAUG00000002452	Irf2bpl	3255626	3257944	101839506	interferon regulatory factor 2 binding protein like [Source:NCBI gene;Acc:101839506]	protein_coding			Irf2bpl	101839506	ENSG00000119669	IRF2BPL	64207	4181.72	0.116827	0.101561	1.15031	0.250017	0.639577
ENSMAUG00000002455	Fbxl7	5478276	5799994	101837006	F-box and leucine rich repeat protein 7 [Source:NCBI gene;Acc:101837006]	protein_coding			Fbxl7	101837006	ENSG00000183580	FBXL7	23194	125.048	0.316907	0.45113	0.702473	0.482384	0.763901
ENSMAUG00000002456	Bnip2	1861662	1881443	101834287	BCL2 interacting protein 2 [Source:NCBI gene;Acc:101834287]	protein_coding			Bnip2	101834287	ENSG00000140299	BNIP2	663	3758.75	0.3238	0.20117	1.60959	0.107488	0.567727
ENSMAUG00000002457	Wdr55	22793450	22797772	101838744	WD repeat domain 55 [Source:NCBI gene;Acc:101838744]	protein_coding			Wdr55	101838744	ENSG00000120314	WDR55	54853	672.843	-0.0976882	0.0986816	-0.989933	0.322207	0.679766
ENSMAUG00000002459	PRKCB	76486947	76487123			protein_coding					ENSG00000166501	PRKCB	5579	38.4243	-0.281585	0.422158	-0.667014	0.504763	0.778309
ENSMAUG00000002463	Reck	6368235	6442428	101828038	reversion inducing cysteine rich protein with kazal motifs [Source:NCBI gene;Acc:101828038]	protein_coding			Reck	101828038	ENSG00000122707	RECK	8434	1491.87	0.0959509	0.207878	0.461573	0.644387	0.845348
ENSMAUG00000002470	Siglec1	10953951	10970982	101824066	sialic acid binding Ig like lectin 1 [Source:NCBI gene;Acc:101824066]	protein_coding			Siglec1	101824066	ENSG00000088827	SIGLEC1	6614	1779.73	2.43837	0.5779	4.21937	2.44991e-05	0.00572035
ENSMAUG00000002471	Ccny	2570410	2707354	101830371	cyclin Y [Source:NCBI gene;Acc:101830371]	protein_coding			Ccny	101830371	ENSG00000108100	CCNY	219771	4086.88	0.101867	0.180609	0.56402	0.57274	0.812049
ENSMAUG00000002477	Rfxank	959430	965853	101836168	regulatory factor X associated ankyrin containing protein [Source:NCBI gene;Acc:101836168]	protein_coding			Rfxank	101836168	ENSG00000064490	RFXANK	8625	1237.69	-0.273634	0.168576	-1.62321	0.104545	0.565008
ENSMAUG00000002487	Cstf3	19215986	19301662	101837557	cleavage stimulation factor subunit 3 [Source:NCBI gene;Acc:101837557]	protein_coding			Cstf3	101837557	ENSG00000176102	CSTF3	1479	806.769	0.0916926	0.0724083	1.26633	0.205396	0.621171
ENSMAUG00000002510	Lrrc10b	47994144	47995022	101842387	leucine rich repeat containing 10B [Source:NCBI gene;Acc:101842387]	protein_coding			Lrrc10b	101842387	ENSG00000204950	LRRC10B	390205	519.201	0.0860038	0.288237	0.298378	0.765414	0.89966
ENSMAUG00000002511	Pkd1l2	10017224	10099880	101831229	polycystin 1 like 2 [Source:NCBI gene;Acc:101831229]	protein_coding			Pkd1l2	101831229	ENSG00000166473	PKD1L2	114780	12.1647	0.595797	0.487639	1.2218	0.221783	0.624934
ENSMAUG00000002515	Taf1d	1248954	1252858	101829648	TATA-box binding protein associated factor, RNA polymerase I subunit D [Source:NCBI gene;Acc:101829648]	protein_coding			Taf1d	101829648	ENSG00000166012	TAF1D	79101	1568.06	0.114764	0.0962019	1.19295	0.232889	0.629571
ENSMAUG00000002519	Tulp3	3255942	3266927		tubby-like protein 3 [Source:MGI Symbol;Acc:MGI:1329045]	protein_coding			Tulp3		ENSG00000078246	TULP3	7289	495.625	0.0597235	0.149301	0.400021	0.689141	0.865323
ENSMAUG00000002521	Abracl	14213557	14221926	101837112	ABRA C-terminal like [Source:NCBI gene;Acc:101837112]	protein_coding			Abracl	101837112	ENSG00000146386	ABRACL	58527	1942.69	-0.0354737	0.162545	-0.218239	0.827243	0.926679
ENSMAUG00000002524	Pirt	10108413	10122481		phosphoinositide-interacting regulator of transient receptor potential channels [Source:MGI Symbol;Acc:MGI:2443635]	protein_coding			Pirt		ENSG00000233670	PIRT	644139	7.21019	2.32176	0.667923	3.47608	0.000508791	0.0628934
ENSMAUG00000002527	Slc6a13	2312841	2349737	101827817	solute carrier family 6 member 13 [Source:NCBI gene;Acc:101827817]	protein_coding			Slc6a13	101827817	ENSG00000010379	SLC6A13	6540	7.05324	-3.72712	1.77936	-2.09465	0.0362023	0.473787
ENSMAUG00000002531	Slamf9	9393159	9444010	101828828	SLAM family member 9 [Source:NCBI gene;Acc:101828828]	protein_coding			Slamf9	101828828	ENSG00000162723	SLAMF9	89886	1097.94	0.637945	0.591035	1.07937	0.280423	0.657989
ENSMAUG00000002532	Ankrd33b	42576912	42633026		ankyrin repeat domain 33B [Source:MGI Symbol;Acc:MGI:1917904]	protein_coding			Ankrd33b		ENSG00000164236	ANKRD33B	651746	200.005	-0.241176	0.25084	-0.961471	0.336316	0.687072
ENSMAUG00000002533	Synj2bp	2452701	2503767	101841984	synaptojanin 2 binding protein [Source:NCBI gene;Acc:101841984]	protein_coding			Gm20498	101841984	ENSG00000258644	SYNJ2BP-COX16	100529257	1869.95	0.163994	0.165893	0.988555	0.322881	0.68077
ENSMAUG00000002542	Cox4i2	533801	539637		cytochrome c oxidase subunit 4I2 [Source:MGI Symbol;Acc:MGI:2135755]	protein_coding			Cox4i2		ENSG00000131055	COX4I2	84701	1832.62	-0.500309	0.331027	-1.51138	0.130691	0.58005
ENSMAUG00000002543	Ccdc85b	51692041	51692649	101834321	coiled-coil domain containing 85B [Source:NCBI gene;Acc:101834321]	protein_coding			Ccdc85b	101834321	ENSG00000175602	CCDC85B	11007	3264.41	-0.457192	0.209626	-2.18099	0.0291844	0.449263
ENSMAUG00000002546	Fndc1	30020155	30095871	101834240	fibronectin type III domain containing 1 [Source:NCBI gene;Acc:101834240]	protein_coding			Fndc1	101834240	ENSG00000164694	FNDC1	84624	1240.54	1.06432	0.739202	1.43982	0.149919	0.595491
ENSMAUG00000002553	Ccr9	395756	401044	101831968	C-C motif chemokine receptor 9 [Source:NCBI gene;Acc:101831968]	protein_coding			Ccr9	101831968	ENSG00000173585	CCR9	10803	20.7922	-1.27272	0.589692	-2.15828	0.0309063	0.459225
ENSMAUG00000002554	Gpr174	460890	461897	101824587	G protein-coupled receptor 174 [Source:NCBI gene;Acc:101824587]	protein_coding			Gpr174	101824587	ENSG00000147138	GPR174	84636	29.0395	0.018268	0.587208	0.0311099	0.975182	0.99089
ENSMAUG00000002555	Cers6	54880791	55070004		ceramide synthase 6 [Source:MGI Symbol;Acc:MGI:2442564]	protein_coding			Cers6		ENSG00000172292	CERS6	253782	67.519	0.760888	0.4972	1.53035	0.125931	0.578951
ENSMAUG00000002557	Jag2	3009967	3031730	101825562	jagged canonical Notch ligand 2 [Source:NCBI gene;Acc:101825562]	protein_coding			Jag2	101825562	ENSG00000184916	JAG2	3714	1150.38	-0.440019	0.117778	-3.73599	0.000186979	0.0323584
ENSMAUG00000002564	CLEC2D	978539	987000	101830303	C-type lectin domain family 2 member D11-like [Source:NCBI gene;Acc:101830303]	protein_coding				101830303	ENSG00000069493	CLEC2D	29121	2307.83	0.474246	0.23077	2.05506	0.0398732	0.478277
ENSMAUG00000002565	Dscam	954336	1507728	101844660	DS cell adhesion molecule [Source:NCBI gene;Acc:101844660]	protein_coding			Dscam	101844660	ENSG00000171587	DSCAM	1826	4.97388	0.235929	0.855563	0.275759	0.782733	0.907387
ENSMAUG00000002566	Cul4b	1531595	1551387		cullin 4B [Source:MGI Symbol;Acc:MGI:1919834]	protein_coding			Cul4b		ENSG00000158290	CUL4B	8450	312.053	0.768187	0.493102	1.55787	0.119265	0.574587
ENSMAUG00000002567	Adam8	58790961	58803744	101825702	ADAM metallopeptidase domain 8 [Source:NCBI gene;Acc:101825702]	protein_coding			Adam8	101825702	ENSG00000151651	ADAM8	101	952.538	-0.255151	0.548173	-0.465457	0.641605	0.844413
ENSMAUG00000002574	Wdr3	707194	731691	101825751	WD repeat domain 3 [Source:NCBI gene;Acc:101825751]	protein_coding			Wdr3	101825751	ENSG00000065183	WDR3	10885	991.606	0.066107	0.114277	0.57848	0.56294	0.807193
ENSMAUG00000002601	Lrrc9	11584288	11659004		leucine rich repeat containing 9 [Source:MGI Symbol;Acc:MGI:1925507]	protein_coding			Lrrc9		ENSG00000131951	LRRC9	341883	137.127	0.278731	0.288598	0.965808	0.33414	0.687072
ENSMAUG00000002603	MIF	4117060	4117965	101843132	macrophage migration inhibitory factor [Source:NCBI gene;Acc:101843132]	protein_coding				101843132	ENSG00000240972	MIF	4282	3984.56	-0.209831	0.153148	-1.37012	0.170649	0.60869
ENSMAUG00000002611	Nabp2	3213185	3221781	101825856	nucleic acid binding protein 2 [Source:NCBI gene;Acc:101825856]	protein_coding			Nabp2	101825856	ENSG00000139579	NABP2	79035	1864.71	-0.212445	0.15142	-1.40302	0.160611	0.602563
ENSMAUG00000002612	Rnf144b	5822803	5891075	101838984	ring finger protein 144B [Source:NCBI gene;Acc:101838984]	protein_coding			Rnf144b	101838984	ENSG00000137393	RNF144B	255488	1658.17	0.349313	0.193689	1.80347	0.0713144	0.530268
ENSMAUG00000002614	Mia	815539	817507	101825109	MIA SH3 domain containing [Source:NCBI gene;Acc:101825109]	protein_coding								425.988	0.553763	0.505037	1.09648	0.272869	0.65437
ENSMAUG00000002622	SKAP2	766182	916593	101829391	src kinase associated phosphoprotein 2 [Source:NCBI gene;Acc:101829391]	protein_coding				101829391	ENSG00000005020	SKAP2	8935	6732.13	-0.0514694	0.149615	-0.344014	0.730836	0.884993
ENSMAUG00000002625	VPS29	1274	1707			protein_coding					ENSG00000111237	VPS29	51699	440.442	0.140453	0.124736	1.126	0.260164	0.645784
ENSMAUG00000002634	Tprn	2060165	2067583	101829372	taperin [Source:NCBI gene;Acc:101829372]	protein_coding			Tprn	101829372	ENSG00000176058	TPRN	286262	517.913	-0.295293	0.158466	-1.86345	0.0623994	0.524211
ENSMAUG00000002635	Klrk1	507118	523486		killer cell lectin-like receptor subfamily K, member 1 [Source:MGI Symbol;Acc:MGI:1196250]	protein_coding								122.928	0.0574171	0.338561	0.169592	0.865331	0.944469
ENSMAUG00000002638	Unc50	7640857	7650581	101831767	unc-50 inner nuclear membrane RNA binding protein [Source:NCBI gene;Acc:101831767]	protein_coding			Unc50	101831767	ENSG00000115446	UNC50	25972	1587.76	0.0175923	0.0853969	0.206006	0.836786	0.932007
ENSMAUG00000002640	Pea15a	9652494	9662037	101830616	proliferation and apoptosis adaptor protein 15 [Source:NCBI gene;Acc:101830616]	protein_coding			Pea15a	101830616	ENSG00000162734	PEA15	8682	11468.3	-0.387398	0.155978	-2.48367	0.0130038	0.337517
ENSMAUG00000002645	ABHD4	3584	3836			protein_coding					ENSG00000100439	ABHD4	63874	301.531	0.054121	0.182842	0.295999	0.767231	0.900648
ENSMAUG00000002646	Ptchd1	2104206	2157799	101833267	patched domain containing 1 [Source:NCBI gene;Acc:101833267]	protein_coding			Ptchd1	101833267	ENSG00000165186	PTCHD1	139411	4.27296	-0.00960033	0.768242	-0.0124965	0.99003	0.996397
ENSMAUG00000002647	C1qtnf5	6604087	6606139	101827662	C1q and TNF related 5 [Source:NCBI gene;Acc:101827662]	protein_coding			C1qtnf5	101827662	ENSG00000223953	C1QTNF5	114902	980.853	-0.285555	0.337013	-0.84731	0.396823	0.716455
ENSMAUG00000002651	Pdcl	4785161	4793287	101830273	phosducin like [Source:NCBI gene;Acc:101830273]	protein_coding			Pdcl	101830273	ENSG00000136940	PDCL	5082	1637.16	0.187563	0.163034	1.15046	0.249956	0.639577
ENSMAUG00000002652	Zfp184	1125613	1140525	106022593	zinc finger protein 184 [Source:NCBI gene;Acc:106022593]	protein_coding								215.435	0.194756	0.113796	1.71146	0.0869971	0.548746
ENSMAUG00000002657	TP53BP1	770174	788389			protein_coding					ENSG00000067369	TP53BP1	7158	796.933	0.0154924	0.0958553	0.161623	0.871603	0.947548
ENSMAUG00000002658	Spin4	552240	552989	101834921	spindlin family member 4 [Source:NCBI gene;Acc:101834921]	protein_coding			Spin4	101834921	ENSG00000186767	SPIN4	139886	9.65727	1.50835	0.892109	1.69077	0.0908813	0.55404
ENSMAUG00000002659	Tmprss4	7710419	7743438	101829963	transmembrane serine protease 4 [Source:NCBI gene;Acc:101829963]	protein_coding			Tmprss4	101829963	ENSG00000137648	TMPRSS4	56649	336.808	-0.120888	0.161721	-0.747505	0.454759	0.747782
ENSMAUG00000002663	Alx4	30048936	30088308	101833638	ALX homeobox 4 [Source:NCBI gene;Acc:101833638]	protein_coding			Alx4	101833638	ENSG00000052850	ALX4	60529	5.63614	1.02501	0.751739	1.36352	0.172718	0.610838
ENSMAUG00000002664	Parp9	4389539	4421937		poly (ADP-ribose) polymerase family, member 9 [Source:MGI Symbol;Acc:MGI:1933117]	protein_coding			Parp9		ENSG00000138496	PARP9	83666	1189.57	1.32534	0.261454	5.06911	3.99688e-07	0.000143866
ENSMAUG00000002669	Rhpn2	3074472	3115816		rhophilin, Rho GTPase binding protein 2 [Source:MGI Symbol;Acc:MGI:1289234]	protein_coding			Rhpn2		ENSG00000131941	RHPN2	85415	395.753	0.518934	0.495399	1.04751	0.294866	0.663444
ENSMAUG00000002671	Pde4dip	573587	770309	101838805	myomegalin [Source:NCBI gene;Acc:101838805]	protein_coding			Pde4dip	101838805	ENSG00000178104	PDE4DIP	9659	1521.21	0.0788312	0.233165	0.338091	0.735294	0.886572
ENSMAUG00000002675	Tnks2	22093366	22147359		tankyrase, TRF1-interacting ankyrin-related ADP-ribose polymerase 2 [Source:MGI Symbol;Acc:MGI:1921743]	protein_coding			Tnks2		ENSG00000107854	TNKS2	80351	1652.19	0.31722	0.262277	1.20949	0.226477	0.626104
ENSMAUG00000002677	Copb2	8288455	8304605		coatomer protein complex, subunit beta 2 (beta prime) [Source:MGI Symbol;Acc:MGI:1354962]	protein_coding			Copb2		ENSG00000184432	COPB2	9276	5894.88	0.00618155	0.0467154	0.132324	0.894728	0.958928
ENSMAUG00000002679	Gstm5	8475666	8478586	101827423	glutathione S-transferase mu 3 [Source:NCBI gene;Acc:101827423]	protein_coding			Gstm5	101827423	ENSG00000134202	GSTM3	2947	1693.56	0.0311751	0.196513	0.158642	0.873951	0.948742
ENSMAUG00000002683	Xkr6	4582426	4795947	101841358	XK related 6 [Source:NCBI gene;Acc:101841358]	protein_coding			Xkr6	101841358	ENSG00000171044	XKR6	286046	27.7058	-0.111161	0.366005	-0.303714	0.761346	0.898012
ENSMAUG00000002684	Atp6v0a1	20485061	20529000	101833148	ATPase H+ transporting V0 subunit a1 [Source:NCBI gene;Acc:101833148]	protein_coding			Atp6v0a1	101833148	ENSG00000033627	ATP6V0A1	535	6016.44	-0.289539	0.0842726	-3.43575	0.000590919	0.0695393
ENSMAUG00000002687	2200002J24Rik	5587000	5587541		RIKEN cDNA 2200002J24 gene [Source:MGI Symbol;Acc:MGI:1916397]	protein_coding								5.50108	2.00268	0.858549	2.33264	0.0196671	0.395794
ENSMAUG00000002688	Usp27x	2199330	2200646	101823599	ubiquitin specific peptidase 27 X-linked [Source:NCBI gene;Acc:101823599]	protein_coding			Usp27x	101823599	ENSG00000273820	USP27X	389856	149.692	-0.0498285	0.189778	-0.262561	0.792889	0.910425
ENSMAUG00000002697	Cd2ap	6856395	6932889	101832452	CD2 associated protein [Source:NCBI gene;Acc:101832452]	protein_coding			Cd2ap	101832452	ENSG00000198087	CD2AP	23607	3788.56	0.305359	0.151254	2.01886	0.0435022	0.480479
ENSMAUG00000002698	Exd1	4385072	4411580	101836161	exonuclease 3'-5' domain containing 1 [Source:NCBI gene;Acc:101836161]	protein_coding			Exd1	101836161	ENSG00000178997	EXD1	161829	96.4217	0.452926	0.264068	1.71519	0.0863102	0.548746
ENSMAUG00000002700	Arid3a	2235359	2265335	101838890	AT-rich interaction domain 3A [Source:NCBI gene;Acc:101838890]	protein_coding			Arid3a	101838890	ENSG00000116017	ARID3A	1820	1148.88	0.104503	0.165156	0.63275	0.526897	0.787668
ENSMAUG00000002709	Matcap1	553696	561428	101823563	KIAA0895 like [Source:NCBI gene;Acc:101823563]	protein_coding			4931428F04Rik	101823563	ENSG00000196123	KIAA0895L	653319	136.884	-0.15113	0.137881	-1.09609	0.273039	0.654458
ENSMAUG00000002713	Cd226	25983351	26049744	101840769	CD226 molecule [Source:NCBI gene;Acc:101840769]	protein_coding			Cd226	101840769	ENSG00000150637	CD226	10666	52.3899	0.893176	0.437019	2.04379	0.0409743	0.479523
ENSMAUG00000002717	Serpine1	7175993	7190238	101829368	serpin family E member 1 [Source:NCBI gene;Acc:101829368]	protein_coding			Serpine1	101829368	ENSG00000106366	SERPINE1	5054	9351.95	-0.767516	0.29579	-2.5948	0.00946459	0.303112
ENSMAUG00000002719	Cartpt	13510133	13512228	101838823	CART prepropeptide [Source:NCBI gene;Acc:101838823]	protein_coding			Cartpt	101838823	ENSG00000164326	CARTPT	9607	3.41213	-2.3088	1.71407	-1.34697	0.17799	0.611361
ENSMAUG00000002720	Insl5	16459452	16462832		insulin-like 5 [Source:MGI Symbol;Acc:MGI:1346085]	protein_coding			Insl5		ENSG00000172410	INSL5	10022	7.92215	-0.54345	0.624327	-0.870457	0.38405	0.712933
ENSMAUG00000002721	Stk38l	13995182	14024337	101837692	serine/threonine kinase 38 like [Source:NCBI gene;Acc:101837692]	protein_coding			Stk38l	101837692	ENSG00000211455	STK38L	23012	698.788	-0.00479267	0.0837667	-0.0572145	0.954374	0.982356
ENSMAUG00000002724	Ints7	3356970	3407686	101839862	integrator complex subunit 7 [Source:NCBI gene;Acc:101839862]	protein_coding			Ints7	101839862	ENSG00000143493	INTS7	25896	1256.82	0.00601198	0.0735464	0.081744	0.93485	0.97412
ENSMAUG00000002730	Inha	3476201	3479161	101834891	inhibin subunit alpha [Source:NCBI gene;Acc:101834891]	protein_coding			Inha	101834891	ENSG00000123999	INHA	3623	21.6398	0.324895	0.436465	0.744378	0.456648	0.748539
ENSMAUG00000002732	Prrg4	19016217	19038644	101842204	proline rich and Gla domain 4 [Source:NCBI gene;Acc:101842204]	protein_coding			Prrg4	101842204	ENSG00000135378	PRRG4	79056	17.3748	0.319617	0.679628	0.470283	0.638153	0.842443
ENSMAUG00000002734	Enpep	2590651	2667491		glutamyl aminopeptidase [Source:MGI Symbol;Acc:MGI:106645]	protein_coding			Enpep		ENSG00000138792	ENPEP	2028	778.307	-0.206574	0.384138	-0.537761	0.590742	0.82073
ENSMAUG00000002735	Tsen15	1499505	1520432	101827141	tRNA splicing endonuclease subunit 15 [Source:NCBI gene;Acc:101827141]	protein_coding			Tsen15	101827141	ENSG00000198860	TSEN15	116461	579.216	0.0754409	0.111684	0.675487	0.499366	0.775344
ENSMAUG00000002748	HDGFL2	7050199	7052788			protein_coding					ENSG00000167674	HDGFL2	84717	374.019	-0.280691	0.128971	-2.17639	0.0295258	0.450128
ENSMAUG00000002751	Abcf2	563356	576329	101833817	ATP binding cassette subfamily F member 2 [Source:NCBI gene;Acc:101833817]	protein_coding								4764.44	-0.107275	0.0624281	-1.71838	0.0857268	0.547327
ENSMAUG00000002759	Hsd17b1	20466066	20467840	101832623	hydroxysteroid 17-beta dehydrogenase 1 [Source:NCBI gene;Acc:101832623]	protein_coding			Hsd17b1	101832623	ENSG00000108786	HSD17B1	3292	41.8421	-0.279585	0.276549	-1.01098	0.312027	0.675783
ENSMAUG00000002760	Dlx5	3375715	3379901	101832570	distal-less homeobox 5 [Source:NCBI gene;Acc:101832570]	protein_coding			Dlx5	101832570	ENSG00000105880	DLX5	1749	14.7243	-1.05959	0.499015	-2.12336	0.0337237	0.465945
ENSMAUG00000002765	Mrps5	7324179	7350777	101834172	mitochondrial ribosomal protein S5 [Source:NCBI gene;Acc:101834172]	protein_coding			Mrps5	101834172	ENSG00000144029	MRPS5	64969	1622.36	0.0165197	0.0728878	0.226645	0.8207	0.924646
ENSMAUG00000002768	Fbxw8	6570786	6668673	101837889	F-box and WD repeat domain containing 8 [Source:NCBI gene;Acc:101837889]	protein_coding			Fbxw8	101837889	ENSG00000174989	FBXW8	26259	3792.35	-0.161941	0.128023	-1.26494	0.205893	0.621277
ENSMAUG00000002769	Hccs	1003	9140	101825201	cytochrome c-type heme lyase [Source:NCBI gene;Acc:101825201]	protein_coding			Hccs	101825201	ENSG00000004961	HCCS	3052	590.554	0.128043	0.188147	0.680547	0.496158	0.773796
ENSMAUG00000002772	Rabgef1	563240	610906	101837540	RAB guanine nucleotide exchange factor 1 [Source:NCBI gene;Acc:101837540]	protein_coding			Rabgef1	101837540	ENSG00000154710	RABGEF1	27342	1027.38	-0.0941018	0.071492	-1.31626	0.188088	0.614558
ENSMAUG00000002777	Ano9	57829622	57845100	101827449	anoctamin 9 [Source:NCBI gene;Acc:101827449]	protein_coding			Ano9	101827449	ENSG00000185101	ANO9	338440	162.458	0.244637	0.199911	1.22373	0.221054	0.624661
ENSMAUG00000002778	Cfap20	1242013	1256880	101832911	cilia and flagella associated protein 20 [Source:NCBI gene;Acc:101832911]	protein_coding			Cfap20	101832911	ENSG00000070761	CFAP20	29105	2100.59	-0.010748	0.122344	-0.0878506	0.929995	0.972327
ENSMAUG00000002782	Kif2c	4809730	4834559	101833152	kinesin family member 2C [Source:NCBI gene;Acc:101833152]	protein_coding			Kif2c	101833152	ENSG00000142945	KIF2C	11004	118.258	-0.435868	0.310692	-1.40289	0.160649	0.602563
ENSMAUG00000002784	Egr4	626535	629039	101837784	early growth response 4 [Source:NCBI gene;Acc:101837784]	protein_coding			Egr4	101837784	ENSG00000135625	EGR4	1961	3.67292	0.777778	1.14028	0.682095	0.495179	0.773456
ENSMAUG00000002785	Dnajc24	17845870	17903462	101839691	DnaJ heat shock protein family (Hsp40) member C24 [Source:NCBI gene;Acc:101839691]	protein_coding			Dnajc24	101839691	ENSG00000170946	DNAJC24	120526	58.6128	0.424182	0.338902	1.25164	0.210703	0.621679
ENSMAUG00000002786	Dpp4	22529061	22596104		dipeptidylpeptidase 4 [Source:MGI Symbol;Acc:MGI:94919]	protein_coding			Dpp4		ENSG00000197635	DPP4	1803	1630.37	-0.0645506	0.354987	-0.181839	0.855709	0.939996
ENSMAUG00000002789	Cpeb3	21802006	21950350	101838439	cytoplasmic polyadenylation element binding protein 3 [Source:NCBI gene;Acc:101838439]	protein_coding			Cpeb3	101838439	ENSG00000107864	CPEB3	22849	282.686	0.132517	0.290604	0.456006	0.648386	0.847517
ENSMAUG00000002793	RPS27	15040303	15040668			protein_coding					ENSG00000177954	RPS27	6232	1057.25	-0.161969	0.212116	-0.763584	0.445115	0.742532
ENSMAUG00000002798	Cntn6	1732545	1963473		contactin 6 [Source:MGI Symbol;Acc:MGI:1858223]	protein_coding			Cntn6		ENSG00000134115	CNTN6	27255	4.67089	-0.609916	0.816719	-0.746788	0.455191	0.747782
ENSMAUG00000002800	Nxn	862396	1007511	101835394	nucleoredoxin [Source:NCBI gene;Acc:101835394]	protein_coding			Nxn	101835394	ENSG00000167693	NXN	64359	1619.57	-0.0878318	0.11352	-0.77371	0.439102	0.740995
ENSMAUG00000002801	Trappc4	6912856	6915862	101831040	trafficking protein particle complex 4 [Source:NCBI gene;Acc:101831040]	protein_coding			Trappc4	101831040	ENSG00000196655	TRAPPC4	51399	1422.26	-0.143863	0.125409	-1.14715	0.251321	0.64071
ENSMAUG00000002803	Stard5	9127156	9137882	101839224	StAR related lipid transfer domain containing 5 [Source:NCBI gene;Acc:101839224]	protein_coding			Stard5	101839224	ENSG00000172345	STARD5	80765	530.787	-0.0539941	0.154144	-0.350284	0.726126	0.882729
ENSMAUG00000002809	MAPK6	12642269	12663488	101825578	mitogen-activated protein kinase 6 [Source:NCBI gene;Acc:101825578]	protein_coding				101825578	ENSG00000069956	MAPK6	5597	1201.17	0.361722	0.208033	1.73877	0.0820745	0.540667
ENSMAUG00000002811	Tsga10	7203500	7285854	101830873	testis specific 10 [Source:NCBI gene;Acc:101830873]	protein_coding			Tsga10	101830873	ENSG00000135951	TSGA10	80705	391.401	0.466326	0.261624	1.78243	0.0746795	0.535541
ENSMAUG00000002813	Rundc1	20085087	20094134	101826441	RUN domain containing 1 [Source:NCBI gene;Acc:101826441]	protein_coding			Rundc1	101826441	ENSG00000198863	RUNDC1	146923	1436.62	0.0217873	0.0717571	0.303625	0.761413	0.898012
ENSMAUG00000002822	Irf2bp1	277036	278799	101831454	interferon regulatory factor 2 binding protein 1 [Source:NCBI gene;Acc:101831454]	protein_coding			Irf2bp1	101831454	ENSG00000170604	IRF2BP1	26145	3371.68	-0.274557	0.112942	-2.43096	0.015059	0.353862
ENSMAUG00000002825	Rpa2	5871225	5895670	101823403	replication protein A2 [Source:NCBI gene;Acc:101823403]	protein_coding			Rpa2	101823403	ENSG00000117748	RPA2	6118	1174.79	-0.340986	0.113342	-3.00848	0.00262559	0.178808
ENSMAUG00000002827	Armh1	4065061	4112649		armadillo-like helical domain containing 1 [Source:MGI Symbol;Acc:MGI:2686507]	protein_coding			Armh1		ENSG00000198520	ARMH1	339541	297.017	-0.0387726	0.321375	-0.120646	0.903972	0.962369
ENSMAUG00000002833	Icam4	9152837	9154098	101834651	intercellular adhesion molecule 4 (Landsteiner-Wiener blood group) [Source:NCBI gene;Acc:101834651]	protein_coding			Icam4	101834651	ENSG00000105371	ICAM4	3386	305.558	-0.345519	0.23264	-1.48521	0.137488	0.58708
ENSMAUG00000002841	Rmc1	23196354	23222027	101838179	regulator of MON1-CCZ1 [Source:NCBI gene;Acc:101838179]	protein_coding			Rmc1	101838179	ENSG00000141452	RMC1	29919	2135.91	-0.0876475	0.0937309	-0.935097	0.349738	0.69344
ENSMAUG00000002846	Uckl1	12697982	12712383	101827680	uridine-cytidine kinase 1 like 1 [Source:NCBI gene;Acc:101827680]	protein_coding			Uckl1	101827680	ENSG00000198276	UCKL1	54963	1296.78	0.00716446	0.138791	0.0516204	0.958831	0.983593
ENSMAUG00000002847	IFT80	1033611	1061051			protein_coding					ENSG00000068885	IFT80	57560	147.398	0.742231	0.445598	1.6657	0.0957737	0.559961
ENSMAUG00000002848	Nipsnap2	162455	190368	101834756	nipsnap homolog 2 [Source:NCBI gene;Acc:101834756]	protein_coding			Nipsnap2	101834756	ENSG00000146729	NIPSNAP2	2631	2929.49	0.0198455	0.0561519	0.353425	0.72377	0.881443
ENSMAUG00000002851	Ptgfrn	1597048	1666013	101827251	prostaglandin F2 receptor inhibitor [Source:NCBI gene;Acc:101827251]	protein_coding			Ptgfrn	101827251	ENSG00000134247	PTGFRN	5738	7274.34	-0.253827	0.254781	-0.996256	0.319126	0.678569
ENSMAUG00000002857	Wipf2	11207500	11235549	101825150	WAS/WASL interacting protein family member 2 [Source:NCBI gene;Acc:101825150]	protein_coding			Wipf2	101825150	ENSG00000171475	WIPF2	147179	1070.82	0.566432	0.430431	1.31597	0.188186	0.614558
ENSMAUG00000002860	TUBA1A	4160523	4161844			protein_coding					ENSG00000167552	TUBA1A	7846	13685.2	-0.283532	0.109126	-2.59821	0.00937103	0.303112
ENSMAUG00000002863	Drosha	9922636	10028756	101843235	drosha ribonuclease III [Source:NCBI gene;Acc:101843235]	protein_coding			Drosha	101843235	ENSG00000113360	DROSHA	29102	1665.47	0.0390315	0.0920574	0.423991	0.671572	0.857388
ENSMAUG00000002864	Asb6	1474015	1478627	101830562	ankyrin repeat and SOCS box containing 6 [Source:NCBI gene;Acc:101830562]	protein_coding			Asb6	101830562	ENSG00000148331	ASB6	140459	1702.58	-0.155412	0.10438	-1.4889	0.136513	0.585818
ENSMAUG00000002865	Tfe3	2625981	2637843	101832678	transcription factor binding to IGHM enhancer 3 [Source:NCBI gene;Acc:101832678]	protein_coding			Tfe3	101832678	ENSG00000068323	TFE3	7030	2360.47	-0.157895	0.0744269	-2.12147	0.0338819	0.465945
ENSMAUG00000002868	Snx18	76273	100615	101840506	sorting nexin 18 [Source:NCBI gene;Acc:101840506]	protein_coding			Snx18	101840506	ENSG00000178996	SNX18	112574	2413.69	0.295776	0.167212	1.76887	0.0769152	0.537298
ENSMAUG00000002875	Gask1a	2053732	2063582		golgi associated kinase 1A [Source:MGI Symbol;Acc:MGI:3041196]	protein_coding			Gask1a		ENSG00000144649	GASK1A	729085	51.4241	0.864265	0.538664	1.60446	0.108612	0.568991
ENSMAUG00000002877	Tnfrsf1a	246797	260203	101840696	TNF receptor superfamily member 1A [Source:NCBI gene;Acc:101840696]	protein_coding			Tnfrsf1a	101840696	ENSG00000067182	TNFRSF1A	7132	11294.1	-0.262412	0.142623	-1.83991	0.065782	0.525807
ENSMAUG00000002880	Bdh2	4189312	4208094	101840581	3-hydroxybutyrate dehydrogenase 2 [Source:NCBI gene;Acc:101840581]	protein_coding			Bdh2	101840581	ENSG00000164039	BDH2	56898	20.9235	0.28877	0.459314	0.628698	0.529547	0.788616
ENSMAUG00000002881	Ifitm5	58016744	58017811	101841134	interferon induced transmembrane protein 5 [Source:NCBI gene;Acc:101841134]	protein_coding			Ifitm5	101841134	ENSG00000206013	IFITM5	387733	11.384	0.318358	0.873197	0.364589	0.715418	0.877486
ENSMAUG00000002882	Mrpl50	720791	725791	101827519	mitochondrial ribosomal protein L50 [Source:NCBI gene;Acc:101827519]	protein_coding			Mrpl50	101827519	ENSG00000136897	MRPL50	54534	790.945	0.0764898	0.113209	0.675654	0.499261	0.775344
ENSMAUG00000002883	Pdhx	20766286	20833366	101825621	pyruvate dehydrogenase complex component X [Source:NCBI gene;Acc:101825621]	protein_coding			Pdhx	101825621	ENSG00000110435	PDHX	8050	664.316	0.103961	0.110656	0.939498	0.347475	0.692444
ENSMAUG00000002885	Xirp2	56614526	56660584	101822527	xin actin binding repeat containing 2 [Source:NCBI gene;Acc:101822527]	protein_coding			Xirp2	101822527	ENSG00000163092	XIRP2	129446	24.1602	1.32634	0.801837	1.65413	0.0981008	0.560848
ENSMAUG00000002887	Prkacb	1025640	1117191	101841299	protein kinase cAMP-activated catalytic subunit beta [Source:NCBI gene;Acc:101841299]	protein_coding			Prkacb	101841299	ENSG00000142875	PRKACB	5567	654.668	0.615449	0.544609	1.13008	0.258445	0.645142
ENSMAUG00000002892	Dnah8	418639	643183	101827490	dynein axonemal heavy chain 8 [Source:NCBI gene;Acc:101827490]	protein_coding			Dnah8	101827490	ENSG00000124721	DNAH8	1769	134.519	0.378573	0.190619	1.98602	0.0470312	0.493107
ENSMAUG00000002894	Efcab2	4538020	4631888	101837886	EF-hand calcium binding domain 2 [Source:NCBI gene;Acc:101837886]	protein_coding			Efcab2	101837886	ENSG00000203666	EFCAB2	84288	226.895	0.334845	0.221394	1.51244	0.130423	0.58005
ENSMAUG00000002903	Casc1	12454524	12501304	101834100	cancer susceptibility 1 [Source:NCBI gene;Acc:101834100]	protein_coding			Casc1	101834100	ENSG00000118307	DNAI7	55259	471.926	0.101979	0.314208	0.324558	0.745516	0.891878
ENSMAUG00000002911	Dnaja3	4527452	4555727		DnaJ heat shock protein family (Hsp40) member A3 [Source:MGI Symbol;Acc:MGI:1933786]	protein_coding			Dnaja3		ENSG00000103423	DNAJA3	9093	2063.07	-0.0342829	0.0610825	-0.561255	0.574624	0.813414
ENSMAUG00000002914	Dpp10	7671706	8462654	101823844	dipeptidyl peptidase like 10 [Source:NCBI gene;Acc:101823844]	protein_coding			Dpp10	101823844	ENSG00000175497	DPP10	57628	82.7568	-0.355661	0.426571	-0.833767	0.404412	0.72131
ENSMAUG00000002917	Dcaf6	13995425	14105747	101831570	DDB1 and CUL4 associated factor 6 [Source:NCBI gene;Acc:101831570]	protein_coding			Dcaf6	101831570	ENSG00000143164	DCAF6	55827	2808.41	0.0202135	0.0849648	0.237905	0.811955	0.921159
ENSMAUG00000002921	Slc16a2	1216088	1328979	101837301	solute carrier family 16 member 2 [Source:NCBI gene;Acc:101837301]	protein_coding			Slc16a2	101837301	ENSG00000147100	SLC16A2	6567	1695.53	-0.256982	0.348297	-0.737824	0.460621	0.75019
ENSMAUG00000002929	Pla2g1b	3887361	3893596	101825423	phospholipase A2-like [Source:NCBI gene;Acc:101825423]	protein_coding			Pla2g1b	101825423	ENSG00000170890	PLA2G1B	5319	90.9597	-0.329292	0.347025	-0.948899	0.342672	0.690558
ENSMAUG00000002930	Cyp26a1	21248894	21252358	101836237	cytochrome P450 26A1 [Source:NCBI gene;Acc:101836237]	protein_coding			Cyp26a1	101836237	ENSG00000095596	CYP26A1	1592	13.9935	1.54439	0.520262	2.96848	0.00299279	0.18548
ENSMAUG00000002933	Ly86	15768207	15826009	101829405	lymphocyte antigen 86 [Source:NCBI gene;Acc:101829405]	protein_coding			Ly86	101829405	ENSG00000112799	LY86	9450	508.304	-0.127531	0.361319	-0.35296	0.724119	0.881443
ENSMAUG00000002936	Cxcr6	365094	366146	106022150	C-X-C motif chemokine receptor 6 [Source:NCBI gene;Acc:106022150]	protein_coding			Cxcr6	106022150	ENSG00000172215	CXCR6	10663	112.133	0.484637	0.36491	1.3281	0.184146	0.612769
ENSMAUG00000002938	Rhcg	5009030	5032382		Rhesus blood group-associated C glycoprotein [Source:MGI Symbol;Acc:MGI:1888517]	protein_coding			Rhcg		ENSG00000140519	RHCG	51458	133.434	-0.122938	0.409521	-0.3002	0.764025	0.898845
ENSMAUG00000002939	Rcan3	8635836	8649490	101838423	RCAN family member 3 [Source:NCBI gene;Acc:101838423]	protein_coding			Rcan3	101838423	ENSG00000117602	RCAN3	11123	419.276	0.421962	0.231064	1.82617	0.0678246	0.525807
ENSMAUG00000002941	Zmat1	602526	631832	101838756	zinc finger matrin-type 1 [Source:NCBI gene;Acc:101838756]	protein_coding			Zmat1	101838756	ENSG00000166432	ZMAT1	84460	238.783	0.499973	0.209745	2.38371	0.017139	0.374613
ENSMAUG00000002950	A930018P22Rik	19764965	19766716	101822358	chromosome unknown C11orf91 homolog [Source:NCBI gene;Acc:101822358]	protein_coding			A930018P22Rik	101822358	ENSG00000205177	C11orf91	100131378	28.4293	0.20268	0.3013	0.672685	0.501148	0.776396
ENSMAUG00000002955	PRR14L	21750036	21786664			protein_coding					ENSG00000183530	PRR14L	253143	281.241	0.404668	0.34519	1.1723	0.241075	0.633998
ENSMAUG00000002957	Mcub	1946653	2004168	101825775	mitochondrial calcium uniporter dominant negative subunit beta [Source:NCBI gene;Acc:101825775]	protein_coding			Mcub	101825775	ENSG00000005059	MCUB	55013	485.204	0.00260759	0.26984	0.00966346	0.99229	0.997394
ENSMAUG00000002959	Tyw1	660656	762154	101841209	S-adenosyl-L-methionine-dependent tRNA 4-demethylwyosine synthase [Source:NCBI gene;Acc:101841209]	protein_coding								1121.09	-0.0486394	0.0979512	-0.496568	0.619494	0.834807
ENSMAUG00000002961	SLC39A12	6055882	6136146	101834659	solute carrier family 39 member 12 [Source:NCBI gene;Acc:101834659]	protein_coding				101834659	ENSG00000148482	SLC39A12	221074	4.03142	0.499581	0.850687	0.587268	0.557024	0.804181
ENSMAUG00000002963	B3gnt2	8428833	8456581	101830860	UDP-GlcNAc:betaGal beta-1,3-N-acetylglucosaminyltransferase 2 [Source:NCBI gene;Acc:101830860]	protein_coding			B3gnt2	101830860	ENSG00000170340	B3GNT2	10678	2643.87	0.164577	0.105821	1.55523	0.11989	0.574646
ENSMAUG00000002966	Ppil6	2507174	2533458	101829079	peptidylprolyl isomerase like 6 [Source:NCBI gene;Acc:101829079]	protein_coding			Ppil6	101829079	ENSG00000185250	PPIL6	285755	303.219	0.36186	0.2968	1.2192	0.222766	0.625113
ENSMAUG00000002970	Ackr4	225261	230198	101839037	atypical chemokine receptor 4 [Source:NCBI gene;Acc:101839037]	protein_coding			Ackr4	101839037	ENSG00000129048	ACKR4	51554	3729.57	-0.267302	0.227846	-1.17317	0.240728	0.633925
ENSMAUG00000002971	Myo7a	8647115	8720019	101823288	myosin VIIA [Source:NCBI gene;Acc:101823288]	protein_coding			Myo7a	101823288	ENSG00000137474	MYO7A	4647	836.438	-0.127142	0.159227	-0.798494	0.424584	0.733744
ENSMAUG00000002979	Inpp5a	59226342	59402543	101830376	inositol polyphosphate-5-phosphatase A [Source:NCBI gene;Acc:101830376]	protein_coding			Inpp5a	101830376	ENSG00000068383	INPP5A	3632	1253.03	0.0757271	0.28374	0.266889	0.789554	0.910189
ENSMAUG00000002981	Stx18	16433078	16537840	101835307	syntaxin 18 [Source:NCBI gene;Acc:101835307]	protein_coding			Stx18	101835307	ENSG00000168818	STX18	53407	1249.03	-0.232534	0.113114	-2.05575	0.039807	0.478277
ENSMAUG00000002982	Nyap1	7775557	7786878	101835347	neuronal tyrosine phosphorylated phosphoinositide-3-kinase adaptor 1 [Source:NCBI gene;Acc:101835347]	protein_coding			Nyap1	101835347	ENSG00000166924	NYAP1	222950	120.979	0.212939	0.210562	1.01129	0.31188	0.675703
ENSMAUG00000002984	Etnk1	10479329	10501339	101834981	ethanolamine kinase 1 [Source:NCBI gene;Acc:101834981]	protein_coding			Etnk1	101834981	ENSG00000139163	ETNK1	55500	273.017	0.84026	0.419645	2.00231	0.0452513	0.488367
ENSMAUG00000002986	Dna2	15565078	15591241		DNA replication helicase/nuclease 2 [Source:MGI Symbol;Acc:MGI:2443732]	protein_coding			Dna2		ENSG00000138346	DNA2	1763	21.8101	-0.433702	0.436316	-0.994008	0.320219	0.678943
ENSMAUG00000002994	Cers3	7682	44896	101843120	ceramide synthase 3 [Source:NCBI gene;Acc:101843120]	protein_coding			Cers3	101843120	ENSG00000154227	CERS3	204219	16.2683	0.753033	0.445383	1.69075	0.0908837	0.55404
ENSMAUG00000003000	Timd4	4971890	4998910	101838220	T-cell immunoglobulin and mucin domain-containing protein 4 [Source:NCBI gene;Acc:101838220]	protein_coding			Timd4	101838220	ENSG00000145850	TIMD4	91937	156.611	2.45719	0.704758	3.48657	0.000489262	0.0609919
ENSMAUG00000003002	Zhx2	2946290	3109792	101824471	zinc fingers and homeoboxes 2 [Source:NCBI gene;Acc:101824471]	protein_coding			Zhx2	101824471	ENSG00000178764	ZHX2	22882	1253.75	-0.17093	0.0981208	-1.74204	0.0815014	0.540667
ENSMAUG00000003007	Zfp628	864226	867360	101827537	zinc finger protein 628 [Source:NCBI gene;Acc:101827537]	protein_coding			Zfp628	101827537	ENSG00000197483	ZNF628	89887	1581.92	-0.181363	0.159184	-1.13933	0.254565	0.642525
ENSMAUG00000003013	Slfn1	4373624	4374775		schlafen 1 [Source:MGI Symbol;Acc:MGI:1313259]	protein_coding								310.833	1.52978	0.303068	5.04764	4.47297e-07	0.00015666
ENSMAUG00000003014	Nudt16l1	4733619	4735903	101824291	nudix hydrolase 16 like 1 [Source:NCBI gene;Acc:101824291]	protein_coding			Nudt16l1	101824291	ENSG00000168101	NUDT16L1	84309	1988.54	-0.168067	0.142425	-1.18004	0.237986	0.632774
ENSMAUG00000003018	Srd5a3	2249385	2260552	101843963	steroid 5 alpha-reductase 3 [Source:NCBI gene;Acc:101843963]	protein_coding								745.959	0.0454795	0.099666	0.456319	0.648161	0.847517
ENSMAUG00000003024	Treml4	12401610	12408636	101831226	triggering receptor expressed on myeloid cells like 4 [Source:NCBI gene;Acc:101831226]	protein_coding			Treml4	101831226	ENSG00000188056	TREML4	285852	147.571	-0.969598	0.420936	-2.30343	0.0212545	0.403625
ENSMAUG00000003029	Ppp1r42	5920598	5960787	101829859	protein phosphatase 1 regulatory subunit 42 [Source:NCBI gene;Acc:101829859]	protein_coding			Ppp1r42	101829859	ENSG00000178125	PPP1R42	286187	36.3383	0.267586	0.361778	0.73964	0.459518	0.749966
ENSMAUG00000003031	Pabpc6	155180	157126		poly(A) binding protein, cytoplasmic 6 [Source:MGI Symbol;Acc:MGI:1914793]	protein_coding								136.298	0.234061	0.200875	1.16521	0.243936	0.635369
ENSMAUG00000003032	Usp35	7942689	7965023	101843597	ubiquitin specific peptidase 35 [Source:NCBI gene;Acc:101843597]	protein_coding			Usp35	101843597	ENSG00000118369	USP35	57558	615.328	-0.266935	0.15064	-1.77201	0.0763922	0.536916
ENSMAUG00000003034	Dhrs13	9426817	9433020	101828118	dehydrogenase/reductase 13 [Source:NCBI gene;Acc:101828118]	protein_coding			Dhrs13	101828118	ENSG00000167536	DHRS13	147015	386.93	-0.19834	0.134322	-1.4766	0.139782	0.588021
ENSMAUG00000003037	Slitrk5	8352376	8359406	101835932	SLIT and NTRK like family member 5 [Source:NCBI gene;Acc:101835932]	protein_coding			Slitrk5	101835932	ENSG00000165300	SLITRK5	26050	4.77222	-1.18514	0.926419	-1.27927	0.200803	0.619155
ENSMAUG00000003039	Otud3	2962378	2984435	101833190	OTU deubiquitinase 3 [Source:NCBI gene;Acc:101833190]	protein_coding			Otud3	101833190	ENSG00000169914	OTUD3	23252	1443.26	0.0778454	0.117371	0.663244	0.507174	0.778878
ENSMAUG00000003041	Gpbp1l1	5428903	5445309	101838221	GC-rich promoter binding protein 1 like 1 [Source:NCBI gene;Acc:101838221]	protein_coding			Gpbp1l1	101838221	ENSG00000159592	GPBP1L1	60313	2521.19	-0.0602322	0.0921837	-0.653393	0.513503	0.78185
ENSMAUG00000003046	Fbxw11	19148072	19248577	101831932	F-box and WD repeat domain containing 11 [Source:NCBI gene;Acc:101831932]	protein_coding			Fbxw11	101831932	ENSG00000072803	FBXW11	23291	3059.3	0.238707	0.124435	1.91833	0.0550693	0.510703
ENSMAUG00000003047	Tmem171	14744389	14752176	101840234	transmembrane protein 171 [Source:NCBI gene;Acc:101840234]	protein_coding			Tmem171	101840234	ENSG00000157111	TMEM171	134285	408.267	0.136617	0.286967	0.476071	0.634023	0.84083
ENSMAUG00000003048	Rasl11b	4198232	4202539	101824724	RAS like family 11 member B [Source:NCBI gene;Acc:101824724]	protein_coding			Rasl11b	101824724	ENSG00000128045	RASL11B	65997	252.914	0.0298101	0.205487	0.14507	0.884656	0.953494
ENSMAUG00000003052	SYNPO2	7775831	7822570	101824362	synaptopodin 2 [Source:NCBI gene;Acc:101824362]	protein_coding				101824362	ENSG00000172403	SYNPO2	171024	577.276	0.152548	0.365509	0.417357	0.676417	0.859694
ENSMAUG00000003054	Cdk10	16209917	16218458	101828278	cyclin dependent kinase 10 [Source:NCBI gene;Acc:101828278]	protein_coding			Cdk10	101828278	ENSG00000185324	CDK10	8558	2651.68	-0.267705	0.152748	-1.75259	0.0796729	0.539252
ENSMAUG00000003058	AREL1	903868	952843			protein_coding					ENSG00000119682	AREL1	9870	1558.95	0.0829849	0.0866498	0.957705	0.338212	0.687945
ENSMAUG00000003060	Ganc	3494694	3553517		glucosidase, alpha; neutral C [Source:MGI Symbol;Acc:MGI:1923301]	protein_coding								143.154	0.201977	0.335846	0.601397	0.547576	0.799567
ENSMAUG00000003061	BET1L	58103239	58105112	101842390	Bet1 golgi vesicular membrane trafficking protein like [Source:NCBI gene;Acc:101842390]	protein_coding			Gm45785	101842390	ENSG00000177951	BET1L	51272	888.726	-0.110755	0.106323	-1.04168	0.297561	0.666386
ENSMAUG00000003063	Lars	17512674	17575584		leucyl-tRNA synthetase [Source:MGI Symbol;Acc:MGI:1913808]	protein_coding			Lars		ENSG00000133706	LARS1	51520	2609.5	-0.0293514	0.0548571	-0.535051	0.592614	0.821729
ENSMAUG00000003072	Grid1	2086387	2772383		glutamate receptor, ionotropic, delta 1 [Source:MGI Symbol;Acc:MGI:95812]	protein_coding			Grid1		ENSG00000182771	GRID1	2894	6.79046	0.355606	0.732398	0.485536	0.627296	0.837671
ENSMAUG00000003081	Vps13d	8848473	9024300		vacuolar protein sorting 13D [Source:MGI Symbol;Acc:MGI:2448530]	protein_coding			Vps13d		ENSG00000048707	VPS13D	55187	1721.4	0.146257	0.222921	0.656095	0.511763	0.780674
ENSMAUG00000003090	Rnase6	4752	5885	101837579	ribonuclease A family member k6 [Source:NCBI gene;Acc:101837579]	protein_coding			Rnase6	101837579	ENSG00000169413	RNASE6	6039	677.56	0.625018	0.237266	2.63426	0.00843219	0.291439
ENSMAUG00000003096	Cd48	10069697	10102124	101823040	CD48 molecule [Source:NCBI gene;Acc:101823040]	protein_coding			Cd48	101823040	ENSG00000117091	CD48	962	1965.44	0.194253	0.220794	0.879793	0.378972	0.710652
ENSMAUG00000003101	Plrg1	12777142	12805026	101840283	pleiotropic regulator 1 [Source:NCBI gene;Acc:101840283]	protein_coding			Plrg1	101840283	ENSG00000171566	PLRG1	5356	1574.94	-0.0838676	0.0643562	-1.30318	0.192514	0.615704
ENSMAUG00000003103	Hinfp	6795924	6813899	106021091	histone H4 transcription factor [Source:NCBI gene;Acc:106021091]	protein_coding			Hinfp	106021091	ENSG00000172273	HINFP	25988	596.33	-0.0153033	0.100871	-0.151712	0.879414	0.950612
ENSMAUG00000003104	Zfp14	185022	190782		zinc finger protein 14 [Source:MGI Symbol;Acc:MGI:99160]	protein_coding			Zfp14		ENSG00000142065	ZFP14	57677	114.645	0.120417	0.144363	0.834126	0.40421	0.721068
ENSMAUG00000003108	Gpc6	2094827	3084303	101835183	glypican 6 [Source:NCBI gene;Acc:101835183]	protein_coding			Gpc6	101835183	ENSG00000183098	GPC6	10082	46.229	0.0636296	0.477599	0.133228	0.894013	0.958571
ENSMAUG00000003109	Rfxap	401503	406002	101823038	regulatory factor X associated protein [Source:NCBI gene;Acc:101823038]	protein_coding			Rfxap	101823038	ENSG00000133111	RFXAP	5994	1687.79	0.0283303	0.0825617	0.343141	0.731492	0.885035
ENSMAUG00000003110	Prima1	12525482	12575540	101842941	proline rich membrane anchor 1 [Source:NCBI gene;Acc:101842941]	protein_coding			Prima1	101842941	ENSG00000175785	PRIMA1	145270	109.922	0.461929	0.376007	1.22851	0.219255	0.622849
ENSMAUG00000003111	Cad	5903079	5925954	101843763	carbamoyl-phosphate synthetase 2, aspartate transcarbamylase, and dihydroorotase [Source:NCBI gene;Acc:101843763]	protein_coding			Cad	101843763	ENSG00000084774	CAD	790	1307.2	-0.161099	0.139785	-1.15247	0.249127	0.639577
ENSMAUG00000003116	Lins1	3926375	3934845	101830023	lines homolog 1 [Source:NCBI gene;Acc:101830023]	protein_coding			Lins1	101830023	ENSG00000140471	LINS1	55180	756.848	-0.187965	0.0922532	-2.03749	0.0416005	0.479523
ENSMAUG00000003117	Rc3h2	4736865	4771337		ring finger and CCCH-type zinc finger domains 2 [Source:MGI Symbol;Acc:MGI:2442789]	protein_coding			Rc3h2		ENSG00000056586	RC3H2	54542	229.917	0.816594	0.555977	1.46875	0.1419	0.589793
ENSMAUG00000003118	Twist2	880806	881288	101833282	twist family bHLH transcription factor 2 [Source:NCBI gene;Acc:101833282]	protein_coding			Twist2	101833282	ENSG00000233608	TWIST2	117581	125.917	-0.00289733	0.200936	-0.0144191	0.988496	0.99608
ENSMAUG00000003120	Aebp1	351636	361148		AE binding protein 1 [Source:MGI Symbol;Acc:MGI:1197012]	protein_coding			Aebp1		ENSG00000106624	AEBP1	165	7875.27	0.0823358	0.468564	0.17572	0.860514	0.94194
ENSMAUG00000003122	Glrx3	61303966	61334540	101829119	glutaredoxin 3 [Source:NCBI gene;Acc:101829119]	protein_coding			Glrx3	101829119	ENSG00000108010	GLRX3	10539	3360.48	-0.187363	0.0957383	-1.95703	0.0503437	0.507338
ENSMAUG00000003126	CCSER2	863734	902692	101844310	coiled-coil serine rich protein 2 [Source:NCBI gene;Acc:101844310]	protein_coding				101844310	ENSG00000107771	CCSER2	54462	359.526	0.121522	0.196223	0.619304	0.535716	0.792562
ENSMAUG00000003129	Megf11	7066512	7265386	101829437	multiple EGF like domains 11 [Source:NCBI gene;Acc:101829437]	protein_coding			Megf11	101829437	ENSG00000157890	MEGF11	84465	499.916	0.504146	0.231465	2.17806	0.0294014	0.450128
ENSMAUG00000003133	Gas2l1	23913508	23922196	101839643	growth arrest specific 2 like 1 [Source:NCBI gene;Acc:101839643]	protein_coding			Gas2l1	101839643	ENSG00000185340	GAS2L1	10634	3255.21	-0.143495	0.138249	-1.03795	0.299295	0.667267
ENSMAUG00000003138	Piwil2	18652787	18691753	101832887	piwi like RNA-mediated gene silencing 2 [Source:NCBI gene;Acc:101832887]	protein_coding			Piwil2	101832887	ENSG00000197181	PIWIL2	55124	4.78628	-0.0141039	0.682861	-0.0206541	0.983522	0.9942
ENSMAUG00000003139	Fh1	7003077	7025514	101842810	fumarate hydratase [Source:NCBI gene;Acc:101842810]	protein_coding			Fh1	101842810	ENSG00000091483	FH	2271	1741.59	-0.0884889	0.121014	-0.73123	0.464639	0.753316
ENSMAUG00000003142	Sipa1l3	608153	816416		signal-induced proliferation-associated 1 like 3 [Source:MGI Symbol;Acc:MGI:1921456]	protein_coding			Sipa1l3		ENSG00000105738	SIPA1L3	23094	3054.85	0.0625597	0.123516	0.506491	0.612512	0.831991
ENSMAUG00000003146	MPDZ	3864921	3877122			protein_coding					ENSG00000107186	MPDZ	8777	50.427	0.917349	0.464072	1.97674	0.048071	0.499521
ENSMAUG00000003148	Cdh22	1005651	1073701	101844864	cadherin 22 [Source:NCBI gene;Acc:101844864]	protein_coding			Cdh22	101844864	ENSG00000149654	CDH22	64405	1451.93	-0.789847	0.23931	-3.30052	0.00096507	0.102604
ENSMAUG00000003150	Cldn2	743656	744348	101830173	claudin 2 [Source:NCBI gene;Acc:101830173]	protein_coding			Cldn2	101830173	ENSG00000165376	CLDN2	9075	4.07418	1.07497	1.2048	0.892238	0.372265	0.705968
ENSMAUG00000003152	Plce1	20201690	20484620	101832834	phospholipase C epsilon 1 [Source:NCBI gene;Acc:101832834]	protein_coding			Plce1	101832834	ENSG00000138193	PLCE1	51196	2358.7	0.371264	0.209436	1.77268	0.0762814	0.536916
ENSMAUG00000003161	Ptpn4	3362160	3520391	101832531	protein tyrosine phosphatase non-receptor type 4 [Source:NCBI gene;Acc:101832531]	protein_coding			Ptpn4	101832531	ENSG00000088179	PTPN4	5775	114.346	0.506982	0.326074	1.55481	0.119992	0.574789
ENSMAUG00000003163	Gmppa	3539029	3546334	101836703	GDP-mannose pyrophosphorylase A [Source:NCBI gene;Acc:101836703]	protein_coding			Gmppa	101836703	ENSG00000144591	GMPPA	29926	2164.05	-0.197602	0.148998	-1.32621	0.18477	0.613261
ENSMAUG00000003167	Rtkn2	10939702	11003122	101833498	rhotekin 2 [Source:NCBI gene;Acc:101833498]	protein_coding			Rtkn2	101833498	ENSG00000182010	RTKN2	219790	10624.6	0.647538	0.321137	2.01639	0.0437588	0.480726
ENSMAUG00000003171	PPP4R1	524773	560818	101839484	protein phosphatase 4 regulatory subunit 1 [Source:NCBI gene;Acc:101839484]	protein_coding				101839484	ENSG00000154845	PPP4R1	9989	1175.1	0.0123762	0.200513	0.0617226	0.950784	0.980719
ENSMAUG00000003174	Poc5	17105824	17122003	101829938	POC5 centriolar protein [Source:NCBI gene;Acc:101829938]	protein_coding			Poc5	101829938	ENSG00000152359	POC5	134359	446.895	0.151817	0.119244	1.27317	0.202959	0.619807
ENSMAUG00000003178	Tbx5	8246999	8290377	101839399	T-box transcription factor 5 [Source:NCBI gene;Acc:101839399]	protein_coding			Tbx5	101839399	ENSG00000089225	TBX5	6910	952.043	0.0107317	0.292723	0.0366617	0.970755	0.988736
ENSMAUG00000003180	Mgmt	61637618	61817687	101830288	O-6-methylguanine-DNA methyltransferase [Source:NCBI gene;Acc:101830288]	protein_coding			Mgmt	101830288	ENSG00000170430	MGMT	4255	105.815	-0.153201	0.293373	-0.522205	0.601528	0.826034
ENSMAUG00000003184	Eepd1	4704328	4803130	101842085	endonuclease/exonuclease/phosphatase family domain containing 1 [Source:NCBI gene;Acc:101842085]	protein_coding			Eepd1	101842085	ENSG00000122547	EEPD1	80820	728.139	0.341063	0.159089	2.14385	0.0320449	0.463893
ENSMAUG00000003185	Zmym6	412870	451066	101826204	zinc finger MYM-type containing 6 [Source:NCBI gene;Acc:101826204]	protein_coding			Zmym6	101826204	ENSG00000163867	ZMYM6	9204	920.75	0.142025	0.0921831	1.54069	0.123393	0.577628
ENSMAUG00000003186	Katnbl1	11604250	11638818	101827889	katanin regulatory subunit B1 like 1 [Source:NCBI gene;Acc:101827889]	protein_coding			Katnbl1	101827889	ENSG00000134152	KATNBL1	79768	623.325	0.148345	0.15582	0.952028	0.341083	0.689566
ENSMAUG00000003190	Ints3	6985326	7023872	101826645	integrator complex subunit 3 [Source:NCBI gene;Acc:101826645]	protein_coding			Ints3	101826645	ENSG00000143624	INTS3	65123	3318.07	-0.298246	0.11252	-2.6506	0.00803482	0.287664
ENSMAUG00000003197	Top3b	8939144	8961692	101826812	DNA topoisomerase III beta [Source:NCBI gene;Acc:101826812]	protein_coding			Top3b	101826812	ENSG00000100038	TOP3B	8940	1673.97	-0.139046	0.0890155	-1.56205	0.118277	0.574021
ENSMAUG00000003201	Prr22	6358952	6361023		proline rich 22 [Source:MGI Symbol;Acc:MGI:2685392]	protein_coding			Prr22		ENSG00000212123	PRR22	163154	45.9238	-0.52011	0.355749	-1.46201	0.143738	0.59194
ENSMAUG00000003202	BACE1	8404284	8420088			protein_coding					ENSG00000186318	BACE1	23621	235.255	0.212787	0.35584	0.597985	0.54985	0.800808
ENSMAUG00000003205	Tbpl1	10186641	10211268	101829671	TATA-box binding protein like 1 [Source:NCBI gene;Acc:101829671]	protein_coding			Tbpl1	101829671	ENSG00000028839	TBPL1	9519	699.996	0.0727976	0.103557	0.702968	0.482076	0.763818
ENSMAUG00000003206	Zfp512	6228749	6246535	101824792	zinc finger protein 512 [Source:NCBI gene;Acc:101824792]	protein_coding			Zfp512	101824792	ENSG00000243943	ZNF512	84450	810.852	0.150963	0.129061	1.1697	0.24212	0.635058
ENSMAUG00000003213	Plg	1909907	1947376		plasminogen [Source:MGI Symbol;Acc:MGI:97620]	protein_coding			Plg		ENSG00000122194	PLG	5340	5.08792	0.284167	0.666575	0.426309	0.669883	0.856718
ENSMAUG00000003215	Plod2	2583611	2653449	101830092	procollagen-lysine,2-oxoglutarate 5-dioxygenase 2 [Source:NCBI gene;Acc:101830092]	protein_coding			Plod2	101830092	ENSG00000152952	PLOD2	5352	2869.22	0.279633	0.20792	1.34491	0.178655	0.611361
ENSMAUG00000003218	AKR1C8P	5199400	5216778	101841267	prostaglandin-E(2) 9-reductase-like [Source:NCBI gene;Acc:101841267]	protein_coding				101841267	ENSG00000264006	AKR1C8P	340811	4464.92	-0.16389	0.218785	-0.749093	0.453801	0.747441
ENSMAUG00000003221	Zan	7432135	7541525	101827351	zonadhesin [Source:NCBI gene;Acc:101827351]	protein_coding			Zan	101827351	ENSG00000146839	ZAN	7455	407.579	-0.0653277	0.192979	-0.338523	0.734969	0.886548
ENSMAUG00000003224	Creb3l1	31728244	31770652	101837749	cAMP responsive element binding protein 3 like 1 [Source:NCBI gene;Acc:101837749]	protein_coding			Creb3l1	101837749	ENSG00000157613	CREB3L1	90993	1538.04	-0.0962003	0.121033	-0.794827	0.426714	0.735223
ENSMAUG00000003225	NUDT7	7086906	7103663	101839292	nudix hydrolase 7 [Source:NCBI gene;Acc:101839292]	protein_coding				101839292	ENSG00000140876	NUDT7	283927	60.3272	0.190803	0.195887	0.974047	0.330033	0.684444
ENSMAUG00000003227	Grap	15341167	15360160	101835140	GRB2-related adapter protein [Source:NCBI gene;Acc:101835140]	protein_coding								3198.19	-0.394554	0.234861	-1.67995	0.0929676	0.557693
ENSMAUG00000003230	Miga1	3481556	3541016	101834584	mitoguardin 1 [Source:NCBI gene;Acc:101834584]	protein_coding			Miga1	101834584	ENSG00000180488	MIGA1	374986	618.69	0.0500801	0.128128	0.390859	0.695902	0.869139
ENSMAUG00000003238	Dhx32	64973641	65018825		DEAH (Asp-Glu-Ala-His) box polypeptide 32 [Source:MGI Symbol;Acc:MGI:2141813]	protein_coding			Dhx32		ENSG00000089876	DHX32	55760	688.39	0.0914608	0.108652	0.841775	0.399914	0.718531
ENSMAUG00000003240	Plau	3571231	3577937	101830372	plasminogen activator, urokinase [Source:NCBI gene;Acc:101830372]	protein_coding			Plau	101830372	ENSG00000122861	PLAU	5328	1325.03	-0.108851	0.234369	-0.464443	0.64233	0.844612
ENSMAUG00000003242	DCLRE1B	4449813	4450880	101842802	DNA cross-link repair 1B [Source:NCBI gene;Acc:101842802]	protein_coding				101842802	ENSG00000118655	DCLRE1B	64858	370.794	-0.162558	0.122294	-1.32924	0.18377	0.612769
ENSMAUG00000003245	Arl5b	6606116	6631192	101827527	ADP ribosylation factor like GTPase 5B [Source:NCBI gene;Acc:101827527]	protein_coding			Arl5b	101827527	ENSG00000165997	ARL5B	221079	427.354	0.461554	0.279178	1.65326	0.0982775	0.56164
ENSMAUG00000003249	STRADB	19540364	19557871	101844812	STE20 related adaptor beta [Source:NCBI gene;Acc:101844812]	protein_coding			Stradb	101844812	ENSG00000082146	STRADB	55437	512.955	0.0462657	0.126922	0.364519	0.71547	0.877486
ENSMAUG00000003251	Wdr44	3724054	3778177	101835280	WD repeat domain 44 [Source:NCBI gene;Acc:101835280]	protein_coding			Wdr44	101835280	ENSG00000131725	WDR44	54521	717.758	0.258606	0.204151	1.26674	0.205249	0.621125
ENSMAUG00000003253	Rnf8	2774119	2797890	106022402	ring finger protein 8 [Source:NCBI gene;Acc:106022402]	protein_coding				106022402	ENSG00000112130	RNF8	9025	1514.79	-0.0524652	0.105763	-0.496062	0.619851	0.835181
ENSMAUG00000003254	Cxcr2	4705328	4713140	101823808	C-X-C motif chemokine receptor 2 [Source:NCBI gene;Acc:101823808]	protein_coding			Cxcr2	101823808	ENSG00000180871	CXCR2	3579	692.777	0.520101	0.733675	0.708899	0.478387	0.762042
ENSMAUG00000003256	Ccne1	212935	222480	101826826	cyclin E1 [Source:NCBI gene;Acc:101826826]	protein_coding			Ccne1	101826826	ENSG00000105173	CCNE1	898	116.112	-0.712094	0.288056	-2.47207	0.0134334	0.33945
ENSMAUG00000003265	Nlrc3	3827731	3851818		NLR family, CARD domain containing 3 [Source:MGI Symbol;Acc:MGI:2444070]	protein_coding			Nlrc3		ENSG00000167984	NLRC3	197358	134.569	-0.216529	0.203893	-1.06197	0.288249	0.660562
ENSMAUG00000003267	Ddx46	1826370	1869094	101832384	DEAD-box helicase 46 [Source:NCBI gene;Acc:101832384]	protein_coding			Ddx46	101832384	ENSG00000145833	DDX46	9879	3027.33	0.0725181	0.0811203	0.893958	0.371345	0.704994
ENSMAUG00000003269	Zkscan16	1974020	1984917	101825178	zinc finger protein 483 [Source:NCBI gene;Acc:101825178]	protein_coding			Zkscan16	101825178	ENSG00000173258	ZNF483	158399	14.3984	0.743688	0.723515	1.02788	0.304006	0.670905
ENSMAUG00000003275	Pbx2	592638	596572	101833385	PBX homeobox 2 [Source:NCBI gene;Acc:101833385]	protein_coding			Pbx2	101833385	ENSG00000204304	PBX2	5089	4286.61	-0.0433267	0.12227	-0.354352	0.723075	0.881375
ENSMAUG00000003276	Atg7	8735304	8965204	101823780	autophagy related 7 [Source:NCBI gene;Acc:101823780]	protein_coding			Atg7	101823780	ENSG00000197548	ATG7	10533	1801.87	-0.224548	0.135358	-1.65892	0.0971313	0.560662
ENSMAUG00000003279	Aopep	7890920	8144647	101822679	aminopeptidase O (putative) [Source:NCBI gene;Acc:101822679]	protein_coding			Aopep	101822679	ENSG00000148120	AOPEP	84909	3135.86	-0.0605527	0.222836	-0.271737	0.785824	0.908721
ENSMAUG00000003287	Commd9	21966937	21984204	101829848	COMM domain containing 9 [Source:NCBI gene;Acc:101829848]	protein_coding			Commd9	101829848	ENSG00000110442	COMMD9	29099	1483.31	-0.140813	0.181526	-0.775719	0.437915	0.740802
ENSMAUG00000003288	TTLL5	17789	37440			protein_coding					ENSG00000119685	TTLL5	23093	292.161	0.0235978	0.122767	0.192216	0.847573	0.936795
ENSMAUG00000003291	Prpf39	3671382	3695428	101835423	pre-mRNA processing factor 39 [Source:NCBI gene;Acc:101835423]	protein_coding			Prpf39	101835423	ENSG00000185246	PRPF39	55015	1171.59	0.429628	0.134887	3.18508	0.00144713	0.132978
ENSMAUG00000003292	Washc4	187222	244472	101826739	WASH complex subunit 4 [Source:NCBI gene;Acc:101826739]	protein_coding			Washc4	101826739	ENSG00000136051	WASHC4	23325	1910.75	0.176507	0.189738	0.930267	0.352233	0.694732
ENSMAUG00000003294	Fnta	3469516	3487145		farnesyltransferase, CAAX box, alpha [Source:MGI Symbol;Acc:MGI:104683]	protein_coding			Fnta		ENSG00000168522	FNTA	2339	1485.74	-0.0450792	0.0614875	-0.733144	0.463471	0.752251
ENSMAUG00000003295	Efna4	5903773	5909892	101838252	ephrin A4 [Source:NCBI gene;Acc:101838252]	protein_coding			Efna4	101838252	ENSG00000243364	EFNA4	1945	105.306	-0.485431	0.26206	-1.85236	0.0639735	0.525066
ENSMAUG00000003298	Eeig2	9546731	9600269	101837532	family with sequence similarity 102 member B [Source:NCBI gene;Acc:101837532]	protein_coding			Fam102b	101837532	ENSG00000162636	FAM102B	284611	3070.86	0.227877	0.240779	0.946417	0.343936	0.691161
ENSMAUG00000003299	ARPC1B	729224	743870	101834036	actin related protein 2/3 complex subunit 1B [Source:NCBI gene;Acc:101834036]	protein_coding				101834036	ENSG00000130429	ARPC1B	10095	31623.7	-0.165187	0.16456	-1.00381	0.31547	0.676784
ENSMAUG00000003305	Ccdc71	4519077	4524367	101826970	coiled-coil domain containing 71 [Source:NCBI gene;Acc:101826970]	protein_coding			Ccdc71	101826970	ENSG00000177352	CCDC71	64925	2610.97	-0.142863	0.0940666	-1.51874	0.128828	0.58005
ENSMAUG00000003307	Cdkn2a	3725395	3748045	101825322	cyclin-dependent kinase inhibitor 2A [Source:NCBI gene;Acc:101825322]	protein_coding			Cdkn2a	101825322	ENSG00000147889	CDKN2A	1029	1138.83	-0.341001	0.236507	-1.44182	0.149353	0.594745
ENSMAUG00000003309	Aqp9	717244	754230	101831056	aquaporin 9 [Source:NCBI gene;Acc:101831056]	protein_coding			Aqp9	101831056	ENSG00000103569	AQP9	366	49.483	-0.300743	0.62342	-0.482409	0.629515	0.839023
ENSMAUG00000003317	Izumo4	1515406	1518115	101839066	IZUMO family member 4 [Source:NCBI gene;Acc:101839066]	protein_coding			Izumo4	101839066	ENSG00000099840	IZUMO4	113177	726.841	-0.109265	0.244425	-0.447029	0.654854	0.849634
ENSMAUG00000003321	Ccr3	166834	167913	101834222	C-C motif chemokine receptor 3 [Source:NCBI gene;Acc:101834222]	protein_coding								88.157	0.440434	0.598863	0.735451	0.462065	0.750881
ENSMAUG00000003322	C5ar1	1457205	1458421		complement component 5a receptor 1 [Source:MGI Symbol;Acc:MGI:88232]	protein_coding			C5ar1		ENSG00000197405	C5AR1	728	2106.44	0.158545	0.258226	0.613975	0.539232	0.794481
ENSMAUG00000003325	Paxip1	1647731	1691804	101832832	PAX interacting protein 1 [Source:NCBI gene;Acc:101832832]	protein_coding			Paxip1	101832832	ENSG00000157212	PAXIP1	22976	741.089	-0.000827444	0.0863385	-0.00958372	0.992353	0.997394
ENSMAUG00000003327	Tcf23	5817550	5821450	101823734	transcription factor 23 [Source:NCBI gene;Acc:101823734]	protein_coding			Tcf23	101823734	ENSG00000163792	TCF23	150921	46.1819	1.16171	0.923335	1.25817	0.208331	0.621679
ENSMAUG00000003333	Nmrk2	1031619	1034278	101837195	nicotinamide riboside kinase 2 [Source:NCBI gene;Acc:101837195]	protein_coding			Nmrk2	101837195	ENSG00000077009	NMRK2	27231	78.8299	-0.0895474	0.426476	-0.209971	0.833691	0.930258
ENSMAUG00000003343	Mast3	324708	350212	101828773	microtubule associated serine/threonine kinase 3 [Source:NCBI gene;Acc:101828773]	protein_coding			Mast3	101828773	ENSG00000099308	MAST3	23031	5642.23	-0.238784	0.15517	-1.53886	0.123839	0.577628
ENSMAUG00000003344	Lcn12	1835219	1840825	101823852	lipocalin 12 [Source:NCBI gene;Acc:101823852]	protein_coding			Lcn12	101823852	ENSG00000184925	LCN12	286256	6.23771	-0.953711	0.583508	-1.63444	0.102166	0.564955
ENSMAUG00000003345	Eid3	4070383	4071507	101833358	EP300 interacting inhibitor of differentiation 3 [Source:NCBI gene;Acc:101833358]	protein_coding			Eid3	101833358	ENSG00000255150	EID3	493861	86.2	0.027444	0.35487	0.0773355	0.938357	0.975769
ENSMAUG00000003346	Cd82	30275488	30319665	101833891	CD82 molecule [Source:NCBI gene;Acc:101833891]	protein_coding			Cd82	101833891	ENSG00000085117	CD82	3732	8194.37	-0.0884063	0.152588	-0.579377	0.562335	0.806783
ENSMAUG00000003352	Ist1	2360850	2380984	101841719	IST1 factor associated with ESCRT-III [Source:NCBI gene;Acc:101841719]	protein_coding			Ist1	101841719	ENSG00000182149	IST1	9798	3988.67	-0.0142654	0.0542827	-0.262798	0.792707	0.910425
ENSMAUG00000003362	Lrrcc1	22789343	22822843	101843831	leucine rich repeat and coiled-coil centrosomal protein 1 [Source:NCBI gene;Acc:101843831]	protein_coding			Lrrcc1	101843831	ENSG00000133739	LRRCC1	85444	363.356	0.407866	0.180751	2.2565	0.0240391	0.41845
ENSMAUG00000003363	H2-Aa	894461	899819	101834602	H-2 class II histocompatibility antigen, A-U alpha chain [Source:NCBI gene;Acc:101834602]	protein_coding								27892.5	-0.296582	0.260731	-1.1375	0.255329	0.642898
ENSMAUG00000003364	Ptprs	6678701	6720141	101825085	protein tyrosine phosphatase receptor type S [Source:NCBI gene;Acc:101825085]	protein_coding			Ptprs	101825085	ENSG00000105426	PTPRS	5802	4002.71	-0.161465	0.173675	-0.929695	0.352529	0.694732
ENSMAUG00000003368	Mob3c	6161013	6169324	101842953	MOB kinase activator 3C [Source:NCBI gene;Acc:101842953]	protein_coding			Mob3c	101842953	ENSG00000142961	MOB3C	148932	860.482	-0.0489319	0.127164	-0.384793	0.700391	0.8709
ENSMAUG00000003373	Eif3g	9293801	9298054	101835437	eukaryotic translation initiation factor 3 subunit G [Source:NCBI gene;Acc:101835437]	protein_coding			Eif3g	101835437	ENSG00000130811	EIF3G	8666	5390.18	-0.261257	0.119327	-2.18943	0.0285656	0.445647
ENSMAUG00000003375	Gatm	2100089	2117058	101822558	glycine amidinotransferase [Source:NCBI gene;Acc:101822558]	protein_coding			Gatm	101822558	ENSG00000171766	GATM	2628	3604.6	-0.0705925	0.157427	-0.448414	0.653854	0.849072
ENSMAUG00000003376	Muc20	7628215	7656362		mucin 20 [Source:MGI Symbol;Acc:MGI:2385039]	protein_coding			Muc20		ENSG00000176945	MUC20	200958	782.987	0.01902	0.229178	0.0829921	0.933858	0.97387
ENSMAUG00000003378	Hk1	16118555	16186772	101839911	hexokinase 1 [Source:NCBI gene;Acc:101839911]	protein_coding			Hk1	101839911	ENSG00000156515	HK1	3098	6696.26	-0.271825	0.0730209	-3.72256	0.000197213	0.0331113
ENSMAUG00000003381	Nup155	5607137	5651577		nucleoporin 155 [Source:MGI Symbol;Acc:MGI:2181182]	protein_coding			Nup155		ENSG00000113569	NUP155	9631	575.005	0.153918	0.0969461	1.58767	0.112361	0.569642
ENSMAUG00000003383	Myh3	9949745	9970507	101825642	myosin-3 [Source:NCBI gene;Acc:101825642]	protein_coding			Myh3	101825642	ENSG00000109063	MYH3	4621	69.0386	-0.284352	0.513984	-0.553231	0.580105	0.81627
ENSMAUG00000003384	Kcnj10	9494495	9520950	101829361	potassium inwardly rectifying channel subfamily J member 10 [Source:NCBI gene;Acc:101829361]	protein_coding			Kcnj10	101829361	ENSG00000177807	KCNJ10	3766	21.5401	0.364289	0.946047	0.385064	0.70019	0.870846
ENSMAUG00000003393	Rcn1	18428991	18442123	101839955	reticulocalbin 1 [Source:NCBI gene;Acc:101839955]	protein_coding			Rcn1	101839955	ENSG00000049449	RCN1	5954	3635.62	0.0120334	0.152868	0.0787171	0.937258	0.975454
ENSMAUG00000003394	Sh3bgrl2	4690749	4740487	101833935	SH3 domain binding glutamate rich protein like 2 [Source:NCBI gene;Acc:101833935]	protein_coding			Sh3bgrl2	101833935	ENSG00000198478	SH3BGRL2	83699	610.406	0.886199	0.337355	2.6269	0.00861667	0.294086
ENSMAUG00000003396	Psmb8	982421	996158	101835386	proteasome 20S subunit beta 8 [Source:NCBI gene;Acc:101835386]	protein_coding			Psmb8	101835386	ENSG00000204264	PSMB8	5696	7584.03	0.209801	0.297867	0.704344	0.481218	0.763311
[truncated: 12,934 more rows]

## Sheet: SARS_3 vs MOCK_3
ENSEMBLE_ID	SYMBOL	StartPos	EndPos	ENTREZID	DESCRIPTION	TYPE	go_id	go_names	MAUR_Symbol	MAUR_ENTREZID	HumanGeneID	HumanSymbol	HUMAN_ENTREZID	baseMean	log2FoldChange	lfcSE	stat	pvalue	padj
[truncated: 14,729 more rows]

[truncated: 5 more sheets: SARS_6 vs MOCK_6, SARS_14 vs MOCK_14, SARS_28 vs MOCK_28, SARS_56 vs MOCK_56, SARS_112 vs MOCK_112]
