# Supplementary material for: Respiratory long COVID in aged hamsters features impaired lung function post-exercise with bronchiolization and fibrosis
Source: Nat Commun. 2025 Feb 28;16:2080. doi: 10.1038/s41467-025-57267-x (PMC11871369; doi:10.1038/s41467-025-57267-x)
Supplement: Supplementary file 5 — Supplementary Data 3 [file 41467_2025_57267_MOESM5_ESM.xlsx]

## Sheet: final
gene	int
Sh2d6	SARS_d14|SARS_d56
Msmb	SARS_d14|SARS_d56
Uchl1	SARS_d14|SARS_d28
Slc17a7	SARS_d14|SARS_d28
Dbp	SARS_d14|SARS_d28|SARS_d56
Tac1	SARS_d14|SARS_d28
PER3	SARS_d112|SARS_d14|SARS_d28|SARS_d56
Necab2	SARS_d14|SARS_d28
Cyp2e1	SARS_d14|SARS_d28|SARS_d56
Tagln3	SARS_d14|SARS_d28
Dlk2	SARS_d14|SARS_d56
Serpina6	SARS_d14|SARS_d56
Dpp6	SARS_d14|SARS_d28
Lox	SARS_d14|SARS_d28
Ttbk1	SARS_d14|SARS_d28
Arntl	SARS_d14|SARS_d28|SARS_d56
Mab21l3	SARS_d14|SARS_d28
Ambn	SARS_d14|SARS_d28
Plppr1	SARS_d14|SARS_d28
Fcgbp	SARS_d14|SARS_d56
Bpifb1	SARS_d14|SARS_d56
Amelx	SARS_d14|SARS_d28
Samd5	SARS_d14|SARS_d28
Emilin3	SARS_d14|SARS_d56
Gap43	SARS_d14|SARS_d28
Wee1	SARS_d14|SARS_d56
Krt15	SARS_d14|SARS_d56
Sncb	SARS_d14|SARS_d28
Lcn3	SARS_d14|SARS_d28
NPAS2	SARS_d14|SARS_d28|SARS_d56
Ccdc33	SARS_d14|SARS_d56
Wdr95	SARS_d14|SARS_d56
ITLN1	SARS_d14|SARS_d56
Adamts4	SARS_d14|SARS_d28
Ankrd65	SARS_d14|SARS_d56
Map7d2	SARS_d14|SARS_d28
Ntsr2	SARS_d14|SARS_d28
Lhb	SARS_d14|SARS_d28
Tacr1	SARS_d14|SARS_d56
Fer1l6	SARS_d14|SARS_d56
NEFM	SARS_d14|SARS_d28
Trpm5	SARS_d14|SARS_d28|SARS_d56
Dpep1	SARS_d14|SARS_d28
Th	SARS_d14|SARS_d28
Golga7b	SARS_d14|SARS_d28
Obp2a	SARS_d14|SARS_d28
Gdpd2	SARS_d14|SARS_d56
Camk2b	SARS_d14|SARS_d28
Grin1	SARS_d14|SARS_d28
Mmd2	SARS_d14|SARS_d28
Epx	SARS_d14|SARS_d56
Kcnj16	SARS_d14|SARS_d28
Clca1	SARS_d14|SARS_d56
Acsbg1	SARS_d14|SARS_d28
Cbln1	SARS_d14|SARS_d28
Caly	SARS_d14|SARS_d28
Stmn3	SARS_d14|SARS_d28
Sntb2	SARS_d14|SARS_d28
Aass	SARS_d14|SARS_d28|SARS_d56
Aldoc	SARS_d14|SARS_d28
Obp2b	SARS_d14|SARS_d28
Lpo	SARS_d14|SARS_d56
A2ml1	SARS_d28|SARS_d56
Fat2	SARS_d28|SARS_d56
Piwil4	SARS_d28|SARS_d56
PLEKHG1	SARS_d28|SARS_d28
Rxfp1	SARS_d28|SARS_d56
Col9a3	SARS_d28|SARS_d56
F2rl2	SARS_d112|SARS_d28
Slc51b	SARS_d28|SARS_d56
KDM2A	SARS_d28|SARS_d28
WWC2	SARS_d28|SARS_d28
Bpifb5	SARS_d112|SARS_d56
Acod1	SARS_d112|SARS_d56

## Sheet: 14-28
Uchl1	SARS_d14|SARS_d28
Slc17a7	SARS_d14|SARS_d28
Tac1	SARS_d14|SARS_d28
Necab2	SARS_d14|SARS_d28
Tagln3	SARS_d14|SARS_d28
Dpp6	SARS_d14|SARS_d28
Lox	SARS_d14|SARS_d28
Ttbk1	SARS_d14|SARS_d28
Mab21l3	SARS_d14|SARS_d28
Ambn	SARS_d14|SARS_d28
Plppr1	SARS_d14|SARS_d28
Amelx	SARS_d14|SARS_d28
Samd5	SARS_d14|SARS_d28
Gap43	SARS_d14|SARS_d28
Sncb	SARS_d14|SARS_d28
Lcn3	SARS_d14|SARS_d28
Adamts4	SARS_d14|SARS_d28
Map7d2	SARS_d14|SARS_d28
Ntsr2	SARS_d14|SARS_d28
Lhb	SARS_d14|SARS_d28
NEFM	SARS_d14|SARS_d28
Dpep1	SARS_d14|SARS_d28
Th	SARS_d14|SARS_d28
Golga7b	SARS_d14|SARS_d28
Obp2a	SARS_d14|SARS_d28
Camk2b	SARS_d14|SARS_d28
Grin1	SARS_d14|SARS_d28
Mmd2	SARS_d14|SARS_d28
Kcnj16	SARS_d14|SARS_d28
Acsbg1	SARS_d14|SARS_d28
Cbln1	SARS_d14|SARS_d28
Caly	SARS_d14|SARS_d28
Stmn3	SARS_d14|SARS_d28
Sntb2	SARS_d14|SARS_d28
Aldoc	SARS_d14|SARS_d28
Obp2b	SARS_d14|SARS_d28

## Sheet: 14-56
Sh2d6	SARS_d14|SARS_d56
Msmb	SARS_d14|SARS_d56
Dlk2	SARS_d14|SARS_d56
Serpina6	SARS_d14|SARS_d56
Fcgbp	SARS_d14|SARS_d56
Bpifb1	SARS_d14|SARS_d56
Emilin3	SARS_d14|SARS_d56
Wee1	SARS_d14|SARS_d56
Krt15	SARS_d14|SARS_d56
Ccdc33	SARS_d14|SARS_d56
Wdr95	SARS_d14|SARS_d56
ITLN1	SARS_d14|SARS_d56
Ankrd65	SARS_d14|SARS_d56
Tacr1	SARS_d14|SARS_d56
Fer1l6	SARS_d14|SARS_d56
Gdpd2	SARS_d14|SARS_d56
Epx	SARS_d14|SARS_d56
Clca1	SARS_d14|SARS_d56
Lpo	SARS_d14|SARS_d56

## Sheet: 14-28-56
Dbp	SARS_d14|SARS_d28|SARS_d56
Cyp2e1	SARS_d14|SARS_d28|SARS_d56
Arntl	SARS_d14|SARS_d28|SARS_d56
NPAS2	SARS_d14|SARS_d28|SARS_d56
Trpm5	SARS_d14|SARS_d28|SARS_d56
Aass	SARS_d14|SARS_d28|SARS_d56

## Sheet: 28-56
A2ml1	SARS_d28|SARS_d56
Fat2	SARS_d28|SARS_d56
Piwil4	SARS_d28|SARS_d56
Rxfp1	SARS_d28|SARS_d56
Col9a3	SARS_d28|SARS_d56
Slc51b	SARS_d28|SARS_d56

## Sheet: all genes
gene	int
Tnfsf15	SARS_d14
TRO	SARS_d14
ERICH3	SARS_d14
Sh2d6	SARS_d14|SARS_d56
Arsi	SARS_d14
Klf8	SARS_d14
Slc6a14	SARS_d14
Scrn1	SARS_d14
Rbp1	SARS_d14
Ogdhl	SARS_d14
Slc38a5	SARS_d14
Msmb	SARS_d14|SARS_d56
Pde12	SARS_d14
Fndc5	SARS_d14
Lama1	SARS_d14
Lin9	SARS_d14
Npr3	SARS_d14
Zdhhc15	SARS_d14
Atg9b	SARS_d14
Mpig6b	SARS_d14
Nrsn2	SARS_d14
Kcp	SARS_d14
6820408C15Rik	SARS_d14
Uchl1	SARS_d14|SARS_d28
Slc9b2	SARS_d14
Ccdc60	SARS_d14
Slc17a7	SARS_d14|SARS_d28
Zfp654	SARS_d14
Prss30	SARS_d14
Dbp	SARS_d14|SARS_d28|SARS_d56
Ctxn1	SARS_d14
Rasal2	SARS_d14
Tac1	SARS_d14|SARS_d28
MBP	SARS_d14
T	SARS_d14
Ush1c	SARS_d14
Clu	SARS_d14
PER3	SARS_d112|SARS_d14|SARS_d28|SARS_d56
Lynx1	SARS_d14
Necab2	SARS_d14|SARS_d28
Ddr2	SARS_d14
Tm4sf1	SARS_d14
C1R	SARS_d14
Icam5	SARS_d14
Prkcg	SARS_d14
Adgrg2	SARS_d14
Slc34a3	SARS_d14
Upk1b	SARS_d14
Cyp2e1	SARS_d14|SARS_d28|SARS_d56
Qrfp	SARS_d14
Uhmk1	SARS_d14
Slc4a10	SARS_d14
Adgra1	SARS_d14
PCP4	SARS_d14
Ppm1l	SARS_d14
Lmntd2	SARS_d14
Atp6v0d2	SARS_d14
Deup1	SARS_d14
Artn	SARS_d14
Ropn1l	SARS_d14
Myh15	SARS_d14
Psrc1	SARS_d14
Itga11	SARS_d14
Mxra8	SARS_d14
Pde6a	SARS_d14
Cfap141	SARS_d14
Pkd1l2	SARS_d14
Mia	SARS_d14
Gask1a	SARS_d14
Grid1	SARS_d14
Gpc6	SARS_d14
Ptpn4	SARS_d14
Muc20	SARS_d14
Disp2	SARS_d14
D930020B18Rik	SARS_d14
Ak7	SARS_d14
Espnl	SARS_d14
XPO4	SARS_d14
Atxn3	SARS_d14
Chic1	SARS_d14
Sntn	SARS_d14
Grik5	SARS_d14
FAM167B	SARS_d14
Calml3	SARS_d14
Rtn4r	SARS_d14
Tagln3	SARS_d14|SARS_d28
Syngr3	SARS_d14
Wdr38	SARS_d14
Snap91	SARS_d14
Mfsd2b	SARS_d14
NEFL	SARS_d14
Lmo3	SARS_d14
Htra3	SARS_d14
CDH3	SARS_d14
Dlk2	SARS_d14|SARS_d56
Scn2b	SARS_d14
Rab44	SARS_d14
PTEN	SARS_d14
Syn1	SARS_d14
D7Ertd443e	SARS_d14
Phc3	SARS_d14
MUC16	SARS_d14
Serpina6	SARS_d14|SARS_d56
Mef2b	SARS_d14
Defb36	SARS_d14
Slc10a6	SARS_d14
Tfrc	SARS_d14
Rimklb	SARS_d14
Tac4	SARS_d14
Ttll3	SARS_d14
Tnks	SARS_d14
1700016K19Rik	SARS_d14
Tfr2	SARS_d14
Dpp6	SARS_d14|SARS_d28
Dnajb13	SARS_d14
Entpd8	SARS_d14
Asgr1	SARS_d14
Pamr1	SARS_d14
Ago2	SARS_d14
Lrrc4b	SARS_d14
Clstn3	SARS_d14
Bend5	SARS_d14
Celf3	SARS_d14
Foxa3	SARS_d14
Klhdc8a	SARS_d14
Vsig1	SARS_d14
Ltf	SARS_d14
Tmem212	SARS_d14
Nfil3	SARS_d14
Lox	SARS_d14|SARS_d28
Clcn5	SARS_d14
Pdpk1	SARS_d14
CATIP	SARS_d14
Tnfrsf25	SARS_d14
Nfe2l3	SARS_d14
Foxh1	SARS_d14
Slc7a15	SARS_d14
Cpne5	SARS_d14
Ube2ql1	SARS_d14
Ccdc153	SARS_d14
Actl6b	SARS_d14
Ttbk1	SARS_d14|SARS_d28
Sh3gl3	SARS_d14
Lnpep	SARS_d14
Tas1r2	SARS_d14
Lif	SARS_d14
HECA	SARS_d14
Odf3b	SARS_d14
Slc47a2	SARS_d14
Car9	SARS_d14
Vwa5b2	SARS_d14
Vipr1	SARS_d14
Rgsl1	SARS_d14
Prmt8	SARS_d14
Dcc	SARS_d14
Bmpr2	SARS_d14
Stra6	SARS_d14
C1qtnf4	SARS_d14
Arntl	SARS_d14|SARS_d28|SARS_d56
Gria3	SARS_d14
Thbs4	SARS_d14
Rhbg	SARS_d14
Fah	SARS_d14
Drc7	SARS_d14
Cdkl5	SARS_d14
Cpxm2	SARS_d14
Atp2b2	SARS_d14
Ccdc50	SARS_d14
Acap2	SARS_d14
Sez6l	SARS_d14
Actr3b	SARS_d14
Fgd4	SARS_d14
B3gnt4	SARS_d14
Mab21l3	SARS_d14|SARS_d28
Rap1gap	SARS_d14
Dynlt4	SARS_d14
Efhb	SARS_d14
Calb1	SARS_d14
Plaat1	SARS_d14
Ambn	SARS_d14|SARS_d28
PPEF2	SARS_d14
Chit1	SARS_d14
Prr16	SARS_d14
H1f10	SARS_d14
Wnt7b	SARS_d14
Slc8a2	SARS_d14
Dusp15	SARS_d14
L3mbtl1	SARS_d14
Fbxo36	SARS_d14
Lrp6	SARS_d14
Vgll3	SARS_d14
Plppr1	SARS_d14|SARS_d28
Klf9	SARS_d14
Col3a1	SARS_d14
RARRES1	SARS_d14
Shc3	SARS_d14
Sez6l2	SARS_d14
Ephb2	SARS_d14
Gucy2d	SARS_d14
Fcgbp	SARS_d14|SARS_d56
Anks1b	SARS_d14
Fermt1	SARS_d14
Kcna5	SARS_d14
Podnl1	SARS_d14
Prr15	SARS_d14
Osr2	SARS_d14
SMURF2	SARS_d14
Hpgd	SARS_d14
Tmem35a	SARS_d14
Ceacam16	SARS_d14
Abca5	SARS_d14
ASPHD1	SARS_d14
Zbtb16	SARS_d14
Vps13a	SARS_d14
Cmtm4	SARS_d14
Agtr1b	SARS_d14
MSLN	SARS_d14
Tef	SARS_d14
Ckmt1	SARS_d14
Bpifb1	SARS_d14|SARS_d56
Hoxb3	SARS_d14
PTPRG	SARS_d14
Mroh7	SARS_d14
Vsx1	SARS_d14
Amelx	SARS_d14|SARS_d28
Shisa8	SARS_d14
Setd7	SARS_d14
Ms4a7	SARS_d14
AVL9	SARS_d14
NME9	SARS_d14
Samd5	SARS_d14|SARS_d28
Nell2	SARS_d14
RIMS1	SARS_d14
Igsf21	SARS_d14
Ppp1r32	SARS_d14
Plekhg4	SARS_d14
Scgb3a2	SARS_d14
Hapln4	SARS_d14
Tmem108	SARS_d14
Fgf10	SARS_d14
Plppr2	SARS_d14
C1qtnf1	SARS_d14
Mroh9	SARS_d14
Ino80d	SARS_d14
Cyp27a1	SARS_d14
Tecrl	SARS_d14
Tdrd1	SARS_d14
Emilin3	SARS_d14|SARS_d56
Fam166b	SARS_d14
Tmprss13	SARS_d14
Rcn3	SARS_d14
TSC22D3	SARS_d14
Scgb3a1	SARS_d14
Syt1	SARS_d14
Slc23a3	SARS_d14
Hhip	SARS_d14
RASAL1	SARS_d14
Per2	SARS_d14
Gap43	SARS_d14|SARS_d28
Tmem145	SARS_d14
Sbspon	SARS_d14
Wee1	SARS_d14|SARS_d56
Extl1	SARS_d14
Krt15	SARS_d14|SARS_d56
Tmtc1	SARS_d14
Fads2b	SARS_d14
Sncb	SARS_d14|SARS_d28
Mro	SARS_d14
Smarcd3	SARS_d14
6430550D23Rik	SARS_d14
Chst9	SARS_d14
Gas6	SARS_d14
Tmem98	SARS_d14
Fam199x	SARS_d14
Dync1i1	SARS_d14
Ttyh1	SARS_d14
Lcn3	SARS_d14|SARS_d28
CLEC2D	SARS_d14
NPAS2	SARS_d14|SARS_d28|SARS_d56
Tox	SARS_d14
Col11a1	SARS_d14
Chrm1	SARS_d14
Entpd2	SARS_d14
Cd177	SARS_d14
Ccdc33	SARS_d14|SARS_d56
Xkr7	SARS_d14
Ern2	SARS_d14
Tmed5	SARS_d14
Vwce	SARS_d14
Erich6	SARS_d14
Trp53inp1	SARS_d14
Dcp2	SARS_d14
Bche	SARS_d14
Cplx1	SARS_d14
Doc2b	SARS_d14
Wasf1	SARS_d14
Zc3hav1l	SARS_d14
Cyp46a1	SARS_d14
Krt16	SARS_d14
Reg3gamma	SARS_d14
Ppp2r2c	SARS_d14
Mamstr	SARS_d14
Rcor2	SARS_d14
INAVA	SARS_d14
Rbfox3	SARS_d14
APC	SARS_d14
Vsig8	SARS_d14
Kif5a	SARS_d14
Col17a1	SARS_d14
Fam178b	SARS_d14
Dnajc6	SARS_d14
Ccdc74a	SARS_d14
Aff4	SARS_d14
Usp31	SARS_d14
Fgf7	SARS_d14
Ccdc24	SARS_d14
CAPS	SARS_d14
PCOLCE	SARS_d14
Angptl1	SARS_d14
Sfrp2	SARS_d14
Yod1	SARS_d14
Ccdc121rt2	SARS_d14
Acsm1	SARS_d14
C2orf50	SARS_d14
Ttc12	SARS_d14
Dyrk4	SARS_d14
Dnah10	SARS_d14
Rab33a	SARS_d14
Slc35a3	SARS_d14
Gata4	SARS_d14
Nbl1	SARS_d14
Tmc5	SARS_d14
C1qtnf6	SARS_d14
Fam107a	SARS_d14
Svop	SARS_d14
Grm4	SARS_d14
ABHD18	SARS_d14
Pnma8c	SARS_d14
Slc16a1	SARS_d14
Krt14	SARS_d14
Wdr95	SARS_d14|SARS_d56
Sstr3	SARS_d14
Fsd1	SARS_d14
Fgf2	SARS_d14
Scrt1	SARS_d14
Ky	SARS_d14
Atl3	SARS_d14
ITLN1	SARS_d14|SARS_d56
Ldlrad1	SARS_d14
Ephb6	SARS_d14
Morn5	SARS_d14
VPS13A	SARS_d14
Calml4	SARS_d14
WDR86	SARS_d14
Prss22	SARS_d14
Efcab10	SARS_d14
Arfgef3	SARS_d14
Dpysl5	SARS_d14
Mapk15	SARS_d14
Zfp423	SARS_d14
Tmem151a	SARS_d14
Gjb3	SARS_d14
Adamts4	SARS_d14|SARS_d28
Ccdc42	SARS_d14
CPT1C	SARS_d14
Mfap2	SARS_d14
Troap	SARS_d14
Rhbdl2	SARS_d14
Lifr	SARS_d14
Fbll1	SARS_d14
Pcsk1n	SARS_d14
Tmed8	SARS_d14
Sall4	SARS_d14
Rgs20	SARS_d14
Cnih2	SARS_d14
Usf3	SARS_d14
Rasgrf2	SARS_d14
Cfap299	SARS_d14
Ankrd65	SARS_d14|SARS_d56
Ikzf4	SARS_d14
Aldh1a2	SARS_d14
Vgf	SARS_d14
Krt71	SARS_d14
Map7d2	SARS_d14|SARS_d28
Tns4	SARS_d14
Fam8a1	SARS_d14
Fgf21	SARS_d14
Atp6v1e2	SARS_d14
Stmn2	SARS_d14
Fgf8	SARS_d14
Tead1	SARS_d14
Crebrf	SARS_d14
DNAH1	SARS_d14
Ntsr2	SARS_d14|SARS_d28
RRM2	SARS_d14
Itih3	SARS_d14
Slc27a2	SARS_d14
Aknad1	SARS_d14
Lhb	SARS_d14|SARS_d28
Tacr1	SARS_d14|SARS_d56
Ankrd34a	SARS_d14
Calcrl	SARS_d14
Sptbn2	SARS_d14
Il25	SARS_d14
TACC1	SARS_d14
Bend4	SARS_d14
Fer1l6	SARS_d14|SARS_d56
Celsr2	SARS_d14
Chat	SARS_d14
Rasgef1c	SARS_d14
Ptpn5	SARS_d14
Mycn	SARS_d14
Rspo3	SARS_d14
Marchf10	SARS_d14
Plp1	SARS_d14
Rnf152	SARS_d14
Ccdc158	SARS_d14
Ly6h	SARS_d14
Nell1	SARS_d14
Ncoa2	SARS_d14
Ccn3	SARS_d14
KRT18	SARS_d14
Atcay	SARS_d14
C1s	SARS_d14
Adgrb1	SARS_d14
Snph	SARS_d14
NFAT5	SARS_d14
Lyve1	SARS_d14
MYO15B	SARS_d14
Reps2	SARS_d14
Eln	SARS_d14
Akr1c14	SARS_d14
Bmper	SARS_d14
NEFM	SARS_d14|SARS_d28
Tubb4a	SARS_d14
Peak1	SARS_d14
RNF208	SARS_d14
Sytl1	SARS_d14
Trpm5	SARS_d14|SARS_d28|SARS_d56
Myo16	SARS_d14
Nrgn	SARS_d14
Apoa1	SARS_d14
Spp1	SARS_d14
PSAT1	SARS_d14
Dpep1	SARS_d14|SARS_d28
Crip3	SARS_d14
Fam3b	SARS_d14
Fbxo2	SARS_d14
Lrrc49	SARS_d14
Enpp1	SARS_d14
Cfap99	SARS_d14
Col1a2	SARS_d14
CES1	SARS_d14
Zyg11b	SARS_d14
Galnt16	SARS_d14
Th	SARS_d14|SARS_d28
Slc39a14	SARS_d14
Cdh15	SARS_d14
Cfap100	SARS_d14
Kifc3	SARS_d14
SPAG9	SARS_d14
Vasn	SARS_d14
Ism1	SARS_d14
Golga7b	SARS_d14|SARS_d28
Pde1b	SARS_d14
Sapcd2	SARS_d14
Epha10	SARS_d14
Mroh2a	SARS_d14
Morn1	SARS_d14
Col1a1	SARS_d14
TRPS1	SARS_d14
Sfrp5	SARS_d14
Trcg1	SARS_d14
Usp45	SARS_d14
Taok1	SARS_d14
Ankmy1	SARS_d14
Gm1673	SARS_d14
Pard3b	SARS_d14
Capn9	SARS_d14
Obp2a	SARS_d14|SARS_d28
Diras2	SARS_d14
Fibcd1	SARS_d14
Shank1	SARS_d14
Gdpd2	SARS_d14|SARS_d56
Camk2b	SARS_d14|SARS_d28
Dkk3	SARS_d14
Eps8l3	SARS_d14
Piga	SARS_d14
Sgtb	SARS_d14
Spaca9	SARS_d14
Grin1	SARS_d14|SARS_d28
Ccl20	SARS_d14
Hmgcs2	SARS_d14
Tff1	SARS_d14
Map3k9	SARS_d14
Map3k2	SARS_d14
Oprl1	SARS_d14
Fabp7	SARS_d14
Atp10b	SARS_d14
Rsph14	SARS_d14
Tmem130	SARS_d14
Mmd2	SARS_d14|SARS_d28
Epx	SARS_d14|SARS_d56
Kcnj16	SARS_d14|SARS_d28
Clca1	SARS_d14|SARS_d56
Cpxm1	SARS_d14
SELENOM	SARS_d14
Zc3h12c	SARS_d14
Zfp683	SARS_d14
Ddr1	SARS_d14
Brsk2	SARS_d14
Mybpc2	SARS_d14
Epm2a	SARS_d14
Acsbg1	SARS_d14|SARS_d28
Scg5	SARS_d14
Pou2af2	SARS_d14
SLC12A5	SARS_d14
Rgcc	SARS_d14
Cbln1	SARS_d14|SARS_d28
Kcnj4	SARS_d14
Hycc2	SARS_d14
Rc3h1	SARS_d14
LMNTD1	SARS_d14
Tnnt1	SARS_d14
SSC4D	SARS_d14
Lancl3	SARS_d14
MORN2	SARS_d14
Caly	SARS_d14|SARS_d28
Stmn3	SARS_d14|SARS_d28
Crispld1	SARS_d14
Sntb2	SARS_d14|SARS_d28
Gbx2	SARS_d14
Aplp1	SARS_d14
Camkv	SARS_d14
Brsk1	SARS_d14
Lin7c	SARS_d14
Aass	SARS_d14|SARS_d28|SARS_d56
Slc45a1	SARS_d14
Syngap1	SARS_d14
Aldh3a1	SARS_d14
Trf	SARS_d14
Zfp597	SARS_d14
Smim1	SARS_d14
Cpz	SARS_d14
6330403K07Rik	SARS_d14
Aldoc	SARS_d14|SARS_d28
Ache	SARS_d14
Igdcc4	SARS_d14
Fam13c	SARS_d14
Syt5	SARS_d14
Lrrc4	SARS_d14
1700021F07Rik	SARS_d14
Anxa9	SARS_d14
Apc2	SARS_d14
Ninl	SARS_d14
Fam81b	SARS_d14
Fam183b	SARS_d14
Obp2b	SARS_d14|SARS_d28
Ntn5	SARS_d14
Lpo	SARS_d14|SARS_d56
Adam2	SARS_d14
B3gnt7	SARS_d14
Dpf3	SARS_d14
CBL	SARS_d14
Cacna1e	SARS_d14
Mindy2	SARS_d14
Ptprd	SARS_d28
Bpifb6	SARS_d28
MT3	SARS_d28
ACACB	SARS_d28
PHF3	SARS_d28
Fras1	SARS_d28
Hlcs	SARS_d28
MBD5	SARS_d28
Foxo1	SARS_d28
Ankrd28	SARS_d28
GRHL2	SARS_d28
Hpgds	SARS_d28
Slamf6	SARS_d28
Rasgrp3	SARS_d28
Efr3b	SARS_d28
Ccl17	SARS_d28
Hacd4	SARS_d28
Pcdhgb7	SARS_d28
A2ml1	SARS_d28|SARS_d56
Pik3cg	SARS_d28
Btnl9	SARS_d28
Ash1l	SARS_d28
Egr3	SARS_d28
Avpr1b	SARS_d28
Pcdhga10	SARS_d28
Fnip2	SARS_d28
Grik1	SARS_d28
Adgrf5	SARS_d28
Ralgapa2	SARS_d28
Fosb	SARS_d28
Igsf10	SARS_d28
Amot	SARS_d28
Slc44a5	SARS_d28
Tmem179	SARS_d28
Aox2	SARS_d28
CPNE4	SARS_d28
ANK2	SARS_d28
Tmcc3	SARS_d28
KDM4C	SARS_d28
Mlc1	SARS_d28
RPL29	SARS_d28
Disc1	SARS_d28
Cdh4	SARS_d28
Nhlh1	SARS_d28
Rpl10l	SARS_d28
Maml3	SARS_d28
TMEM131	SARS_d28
Kcng4	SARS_d28
Bpifb3	SARS_d28
Prrg3	SARS_d28
ADAM19	SARS_d28
Fat2	SARS_d28|SARS_d56
CFAP46	SARS_d28
P2RY10	SARS_d28
ELF4	SARS_d28
Fn1	SARS_d28
Plac9	SARS_d28
SH3PXD2B	SARS_d28
Etv3	SARS_d28
Cdc14b	SARS_d28
PRSS45P	SARS_d28
Tmem213	SARS_d28
Ugt2a1	SARS_d28
Pik3r3	SARS_d28
Fbxl7	SARS_d28
Cartpt	SARS_d28
PRR14L	SARS_d28
Ganc	SARS_d28
MPDZ	SARS_d28
Rtkn2	SARS_d28
Cpm	SARS_d28
Ptgds	SARS_d28
Dck	SARS_d28
Arhgap26	SARS_d28
Tulp4	SARS_d28
Nedd4	SARS_d28
Pakap	SARS_d28
Mylk	SARS_d28
DOCK1	SARS_d28
Dspp	SARS_d28
FAM135A	SARS_d28
Rbl1	SARS_d28
Ankrd1	SARS_d28
Rgp1	SARS_d28
Lgr6	SARS_d28
Pax8	SARS_d28
Tnfsf8	SARS_d28
Epha4	SARS_d28
DCP1A	SARS_d28
Dock4	SARS_d28
Kcnj9	SARS_d28
Enc1	SARS_d28
Clec4d	SARS_d28
Rab23	SARS_d28
SIPA1L1	SARS_d28
Kctd4	SARS_d28
Myo6	SARS_d28
Zfp157	SARS_d28
Mamld1	SARS_d28
Ppara	SARS_d28
Traf6	SARS_d28
Hs3st3b1	SARS_d28
Nr3c2	SARS_d28
Nrp1	SARS_d28
Sacs	SARS_d28
Zbtb20	SARS_d28
UTRN	SARS_d28
Inpp4b	SARS_d28
Trabd2b	SARS_d28
Gja1	SARS_d28
PSMB3	SARS_d28
Trio	SARS_d28
MTMR4	SARS_d28
Asphd2	SARS_d28
Atp8b3	SARS_d28
Atp2b4	SARS_d28
Trim25	SARS_d28
Agr3	SARS_d28
Slc7a10	SARS_d28
Nmnat2	SARS_d28
Ap3b2	SARS_d28
Pcdhb14	SARS_d28
Ccnjl	SARS_d28
Lcn4	SARS_d28
Slc36a1	SARS_d28
ARHGEF6	SARS_d28
Itga2	SARS_d28
Fat1	SARS_d28
Kif21b	SARS_d28
NOL8	SARS_d28
USP7	SARS_d28
PTPN21	SARS_d28
Slc6a11	SARS_d28
Hip1	SARS_d28
Cdh6	SARS_d28
Zfp516	SARS_d28
Mrtfb	SARS_d28
RAB11FIP1	SARS_d28
Pcdhga8	SARS_d28
Fam163b	SARS_d28
EIF4G1	SARS_d28
Acsl6	SARS_d28
Zswim6	SARS_d28
Arhgdig	SARS_d28
Ikzf3	SARS_d28
Edar	SARS_d28
Wdfy3	SARS_d28
Cyp1a2	SARS_d28
MYO1E	SARS_d28
PRRC2C	SARS_d28
Esyt2	SARS_d28
RPL31	SARS_d28
Mid1	SARS_d28
NEMF	SARS_d28
Ephx4	SARS_d28
Fhip2a	SARS_d28
Lypd6	SARS_d28
Tet2	SARS_d28
Apba1	SARS_d28
RPL14	SARS_d28
KIAA1217	SARS_d28
Tceanc	SARS_d28
Gab1	SARS_d28
ROBO1	SARS_d28
DOCK8	SARS_d28
DYNLL1	SARS_d28
Pcdh19	SARS_d28
RAPGEF5	SARS_d28
Serinc5	SARS_d28
Ldlrad3	SARS_d28
Bcl2l11	SARS_d28
Map4k3	SARS_d28
Fbn2	SARS_d28
Ranbp10	SARS_d28
Heatr5a	SARS_d28
Cdin1	SARS_d28
KPNA5	SARS_d28
STK36	SARS_d28
Cr2	SARS_d28
Tmprss7	SARS_d28
Slc4a5	SARS_d28
Masp1	SARS_d28
Cdh17	SARS_d28
SMARCA2	SARS_d28
Bcan	SARS_d28
Ctxn3	SARS_d28
Kif19b	SARS_d28
Tbc1d32	SARS_d28
Stk32b	SARS_d28
Tut4	SARS_d28
D430041D05Rik	SARS_d28
Crebbp	SARS_d28
Asxl3	SARS_d28
Tiam1	SARS_d28
Tbc1d4	SARS_d28
Sgms2	SARS_d28
Pitpnm3	SARS_d28
Ncoa3	SARS_d28
Anln	SARS_d28
Slc26a4	SARS_d28
Ap1s3	SARS_d28
SLC16A14	SARS_d28
SDC3	SARS_d28
Zfp366	SARS_d28
NXPE1	SARS_d28
Cela2a	SARS_d28
Igfn1	SARS_d28
Agrn	SARS_d28
Ccr6	SARS_d28
Cgref1	SARS_d28
Slc35f1	SARS_d28
Pmaip1	SARS_d28
Bpifb4	SARS_d28
SETD1B	SARS_d28
Clec2l	SARS_d28
Mlxip	SARS_d28
Piwil4	SARS_d28|SARS_d56
Ints6l	SARS_d28
Pfpl	SARS_d28
Abca12	SARS_d28
Ddn	SARS_d28
Efna3	SARS_d28
ASZ1	SARS_d28
Ptprj	SARS_d28
Umodl1	SARS_d28
Rasl10b	SARS_d28
Nkain4	SARS_d28
Dll3	SARS_d28
Nav2	SARS_d28
PLEKHG1	SARS_d28|SARS_d28
Otop1	SARS_d28
Kidins220	SARS_d28
Rad54l2	SARS_d28
Chga	SARS_d28
Pphln1	SARS_d28
Adcy1	SARS_d28
Notch1	SARS_d28
Sall3	SARS_d28
Ciita	SARS_d28
Utp20	SARS_d28
GTF3C1	SARS_d28
St8sia5	SARS_d28
Rxfp1	SARS_d28|SARS_d56
Gas7	SARS_d28
1110002E22Rik	SARS_d28
Akap13	SARS_d28
Wasf2	SARS_d28
Rab11fip4	SARS_d28
Atrn	SARS_d28
Fgfr2	SARS_d28
Fat4	SARS_d28
Zfp800	SARS_d28
Maml2	SARS_d28
Tmem121	SARS_d28
Sbf2	SARS_d28
Ythdf3	SARS_d28
N4bp2	SARS_d28
Cd180	SARS_d28
Mcidas	SARS_d28
Adamts20	SARS_d28
Rimkla	SARS_d28
Col9a3	SARS_d28|SARS_d56
Abcb1a	SARS_d28
Trim56	SARS_d28
Afdn	SARS_d28
FRYL	SARS_d28
Xylt1	SARS_d28
Zkscan1	SARS_d28
ENPP2	SARS_d28
Rai14	SARS_d28
Uevld	SARS_d28
Dpy19l3	SARS_d28
Slitrk6	SARS_d28
Hectd4	SARS_d28
PTPRM	SARS_d28
Dennd2c	SARS_d28
Eml6	SARS_d28
Soga1	SARS_d28
Sema3c	SARS_d28
Acox2	SARS_d28
Foxa1	SARS_d28
Sv2b	SARS_d28
Nr2e1	SARS_d28
Nbea	SARS_d28
Elovl3	SARS_d28
Vps13b	SARS_d28
CIT	SARS_d28
Tjp1	SARS_d28
TNS3	SARS_d28
Plxna1	SARS_d28
Slc8a1	SARS_d28
Crip1	SARS_d28
LRRIQ3	SARS_d28
1700024G13Rik	SARS_d28
MDN1	SARS_d28
Slc32a1	SARS_d28
Bcl11b	SARS_d28
Azgp1	SARS_d28
Nrn1l	SARS_d28
Tnf	SARS_d28
Nmb	SARS_d28
Ep400	SARS_d28
Akap6	SARS_d28
Fcamr	SARS_d28
TSC22D2	SARS_d28
Tespa1	SARS_d28
Marcks	SARS_d28
Opcml	SARS_d28
NFATC3	SARS_d28
Lama3	SARS_d28
Nrg4	SARS_d28
BPTF	SARS_d28
KAT6A	SARS_d28
Iqsec3	SARS_d28
Podxl	SARS_d28
Myct1	SARS_d28
Xkr9	SARS_d28
Irs1	SARS_d28
Frem1	SARS_d28
Mtr	SARS_d28
Slc22a20	SARS_d28
BEX4	SARS_d28
Tfcp2	SARS_d28
Cntn2	SARS_d28
Ccdc88c	SARS_d28
Wnt16	SARS_d28
Ago1	SARS_d28
Pcdhga6	SARS_d28
Cdh1	SARS_d28
DOCK9	SARS_d28
Rorc	SARS_d28
BGLAP	SARS_d28
MAST4	SARS_d28
Sh3pxd2a	SARS_d28
ROCK2	SARS_d28
Piezo2	SARS_d28
Fgd5	SARS_d28
Kcnk7	SARS_d28
Lrrc26	SARS_d28
Or52d1	SARS_d28
Zfp280b	SARS_d28
Ltbp2	SARS_d28
F2rl2	SARS_d112|SARS_d28
Cacng7	SARS_d28
Fut4	SARS_d28
IL6ST	SARS_d28
Dlgap3	SARS_d28
MOB1A	SARS_d28
Ikzf1	SARS_d28
Il18rap	SARS_d28
Gpr17	SARS_d28
Soat2	SARS_d28
Il7r	SARS_d28
HMCN1	SARS_d28
Krt5	SARS_d28
Ptgis	SARS_d28
Slc51b	SARS_d28|SARS_d56
Arhgap28	SARS_d28
Iffo2	SARS_d28
EIF4G3	SARS_d28
KDM2A	SARS_d28|SARS_d28
Dip2b	SARS_d28
Lrp4	SARS_d28
Adamts1	SARS_d28
Elavl3	SARS_d28
Garre1	SARS_d28
Pon1	SARS_d28
Ankrd52	SARS_d28
Srgap1	SARS_d28
Sdcbp2	SARS_d28
Nhs	SARS_d28
CELF4	SARS_d28
Ednra	SARS_d28
Rgs13	SARS_d28
Tsacc	SARS_d28
RDH16	SARS_d28
Ros1	SARS_d28
Coq8a	SARS_d28
Cdh20	SARS_d28
SORBS2	SARS_d28
Dlc1	SARS_d28
Zbtb39	SARS_d28
Ctla4	SARS_d28
DNAH12	SARS_d28
Pcdhga4	SARS_d28
Rpgrip1l	SARS_d28
Tanc2	SARS_d28
Cldn8	SARS_d28
Sez6	SARS_d28
Omp	SARS_d28
Rbm33	SARS_d28
Sned1	SARS_d28
Nptx2	SARS_d28
Cacna1c	SARS_d28
TBX3	SARS_d28
Pcdhga1	SARS_d28
GBF1	SARS_d28
Gad2	SARS_d28
Rev3l	SARS_d28
Hmbox1	SARS_d28
RPL12	SARS_d28
Fbxo39	SARS_d28
DOP1A	SARS_d28
Ahr	SARS_d28
Sec14l5	SARS_d28
Agl	SARS_d28
Nedd9	SARS_d28
Nfix	SARS_d28
NEK1	SARS_d28
Myo10	SARS_d28
Zfp462	SARS_d28
Ttc28	SARS_d28
Col6a3	SARS_d28
Phactr4	SARS_d28
Dennd4a	SARS_d28
Reln	SARS_d28
Syne3	SARS_d28
Col6a5	SARS_d28
Dip2a	SARS_d28
Dsg2	SARS_d28
Zfp618	SARS_d28
Itk	SARS_d28
Tet3	SARS_d28
Ifitm10	SARS_d28
Cxcl12	SARS_d28
Nr1d1	SARS_d28
MAPKBP1	SARS_d28
Bahcc1	SARS_d28
Zfp9	SARS_d28
Gfy	SARS_d28
SHPRH	SARS_d28
Fbxo42	SARS_d28
Fyco1	SARS_d28
Pcp4l1	SARS_d28
Tnni2	SARS_d28
Gabrr1	SARS_d28
Il17rb	SARS_d28
Slc35f3	SARS_d28
Loxl2	SARS_d28
Ppp1r14d	SARS_d28
Cecr2	SARS_d28
Alas1	SARS_d28
Tnc	SARS_d28
S100a5	SARS_d28
Lcn11	SARS_d28
Ren1	SARS_d28
Pdk1	SARS_d28
Mcc	SARS_d28
Macf1	SARS_d28
4933405L10Rik	SARS_d28
PRDM10	SARS_d28
Hif1an	SARS_d28
Ankrd44	SARS_d28
Cyyr1	SARS_d28
Fkbp5	SARS_d28
Osmr	SARS_d28
Cxcl5	SARS_d28
Ngfr	SARS_d28
Fbn1	SARS_d28
Tnfrsf19	SARS_d28
Hic2	SARS_d28
Klhl24	SARS_d28
USP15	SARS_d28
WWC2	SARS_d28|SARS_d28
Ece1	SARS_d28
Myocd	SARS_d28
Cacna1d	SARS_d28
Vmo1	SARS_d28
Lgi2	SARS_d28
Col4a2	SARS_d28
Cpne6	SARS_d28
Il2ra	SARS_d28
Baz2a	SARS_d28
Exoc6b	SARS_d28
Kpna3	SARS_d28
NCOA6	SARS_d28
Rad51c	SARS_d28
Ddx17	SARS_d28
Pck1	SARS_d28
Shank2	SARS_d28
Atp4a	SARS_d28
Rundc3a	SARS_d28
Slc5a8	SARS_d28
Arhgap19	SARS_d28
Shisa6	SARS_d28
Col4a3	SARS_d28
IREB2	SARS_d28
Csnk1g1	SARS_d28
Ssu2	SARS_d28
AUTS2	SARS_d28
Armc12	SARS_d28
A4gnt	SARS_d28
Otos	SARS_d28
Ghrl	SARS_d28
Kcnh4	SARS_d28
POLR2A	SARS_d28
Slc13a2	SARS_d28
Pld1	SARS_d28
Thbs1	SARS_d28
Kmt2a	SARS_d28
Srcin1	SARS_d28
Bend3	SARS_d28
Enho	SARS_d28
Gatad2b	SARS_d28
Diras1	SARS_d28
Klhl14	SARS_d28
SPATA33	SARS_d28
Col4a1	SARS_d28
Tmprss12	SARS_d28
Adamts9	SARS_d28
Ubr1	SARS_d28
Clmp	SARS_d28
Lmln	SARS_d28
A3galt2	SARS_d28
Cyp2g1	SARS_d28
Slc6a1	SARS_d28
Elavl4	SARS_d28
Ryr2	SARS_d28
Gad1	SARS_d28
Unc79	SARS_d28
Clasp1	SARS_d28
Abr	SARS_d28
Snap25	SARS_d28
Gfap	SARS_d28
Prdm1	SARS_d28
Ccnj	SARS_d28
ERN1	SARS_d28
Mchr1	SARS_d28
Cyp2f2	SARS_d28
Ddx3x	SARS_d28
Mypn	SARS_d28
Fam168a	SARS_d28
Padi2	SARS_d28
Atp6v0a4	SARS_d28
Abcc9	SARS_d28
IFT140	SARS_d28
Uncx	SARS_d28
Zfp445	SARS_d28
Phactr2	SARS_d28
Smad3	SARS_d28
Obscn	SARS_d28
Hsph1	SARS_d56
Treml4	SARS_d56
Hmx3	SARS_d56
Adam12	SARS_d56
Mfsd4a	SARS_d56
Bpifb5	SARS_d112|SARS_d56
Mcpt8	SARS_d56
Gabrp	SARS_d56
Acan	SARS_d56
GP2	SARS_d56
Svopl	SARS_d56
Bpifa1	SARS_d56
Sh2d7	SARS_d56
Ephb1	SARS_d56
Hgd	SARS_d56
Col9a1	SARS_d56
Agr2	SARS_d56
Lrriq4	SARS_d56
Fcgr4	SARS_d56
Gngt2	SARS_d56
Col2a1	SARS_d56
Sox9	SARS_d56
Acod1	SARS_d112|SARS_d56
SECTM1	SARS_d56
Mpo	SARS_d112
Csf3r	SARS_d112
Cxcr2	SARS_d112
Mmp9	SARS_d112
S100a9	SARS_d112
Prok2	SARS_d112
Sds	SARS_d112
MGAM	SARS_d112
Lrg1	SARS_d112
Arg1	SARS_d112
Slc6a12	SARS_d112
Il1b	SARS_d112
S100a8	SARS_d112
Mmp25	SARS_d112
P2ry13	SARS_d112
Padi4	SARS_d112
Slc16a3	SARS_d112
TNFSF9	SARS_d112
