# Supplementary material for: Respiratory long COVID in aged hamsters features impaired lung function post-exercise with bronchiolization and fibrosis
Source: Nat Commun. 2025 Feb 28;16:2080. doi: 10.1038/s41467-025-57267-x (PMC11871369; doi:10.1038/s41467-025-57267-x)
Supplement: Supplementary file 6 — Supplementary Data 4 [file 41467_2025_57267_MOESM6_ESM.xlsx]

## Sheet: SCORE
1. Alveolar lesions
1.1. Extent alveolar inflammation
0	No	No inflammation or single small foci of mild lesions, affecting max. 1% of tissue, (significance questionable)
1	Mild	2-25 % of tissue affected
2	Moderate	26-50 % of tissue affected
3	Marked	51-75 % of tissue affected
4	Subtotal	> 75 % of tissue affected
1.2. Severity alveolar inflammation (scored in area of maximal severity)
0	No	No inflammatory infiltrates
1	Minimal	Few inflammatory cells in alveolar septae or lumina, alveolar architecture maintained
2	Mild	Mild septal and luminal infiltrates (2-3 cells thick), alveolar architecture maintained
3	Moderate	Moderate septal and luminal infiltrates, occasionally obscuring alveolar architecture
4	Marked	Marked septal and luminal infiltrates with large areas with completely obscured alveolar architecture
1.3. Combined Lesion Score
	Extent Score x Severity Score
1.4. Alveolar damage
0/1	No/Yes	Necrosis/desquamation/loss (denuded septae) of alveolar cells
0/1	No/Yes	Intraalveolar fibrin/hyaline membranes
0/1	No/Yes	Atypical/large or multinucleated cells lining alveoli
0/1	No/Yes	Alveolar edema
0/1	No/Yes	Alveolar hemorrhage
1.5. Extent alveolar regeneration
0	No	None or single foci with mildly increased number of plump cells lining alveoli and or mild peribronchial, tortous epithelial proliferates, affecting max. 1 % of tissue (significance questionable)
1	Mild	Mild, multifocal epithelial hyperplasia as described above + with atypical/large/multinucleated cells/affecting 2-25 % of tissue
2	Moderate	Moderate, multifocal to coalescing epithelial hyperplasia as described above + with atypical/large/multinucleated cells/affecting 26-50 % of tissue
3	Marked	Marked, multifocal to coalescing epithelial hyperplasia as described above + with atypical/large/multinucleated cells/affecting 51-75 % of tissue
4	Subtotal	Marked, multifocal to coalescing epithelial hyperplasia as described above + with atypical/large/multinucleated cells/affecting >75 % of tissue
1.6 presence of sub-pleural fibrosis
0	no	no foci of sub-pleural fibrosis
1	yes	presence of sub-pleural fibrosis foci
1.7. Total alveolar lesion score
	Sum 1.3 - 1.6
2. Airway lesions
2.1. Extent airway inflammation/Lesions
0	No	No Lesions or single small foci of mild lesions, affecting max. 1% of tissue, (significance questionable)
1	Mild	2-25 % of tissue affected
2	Moderate	26-50 % of tissue affected
3	Marked	51-75 % of tissue affected
4	Subtotal	> 75 % of tissue affected
2.2. Severity airway (bronchi/bronchiole) lesions (scored in area of maximal severity)
0	No	No inflammation/Lesions
1	Minimal	Rare peribronchial/peribronchiolar, mild, mononuclear infiltrates/ degenerative changes/ necrotic changes
2	Mild	Mild, mononuclear and granulocytic bronchitis/bronchiolitis with exocytosis of inflammatory cells into epithelium and/or occasional single cell necrosis and/or mild, peribronchial/peribronchiolar infiltrates
3	Moderate	Moderate, mononuclear and granulocytic to necrotizing bronchitis/bronchiolitis with exocytosis of inflammatory cells into epithelium and/or frequent single cell necrosis and intraluminal debris and/or moderate, peribronchial/peribronchiolar infiltrates
4	Marked	Marked, mononuclear and granulocytic and necrotizing bronchitis/bronchiolitis with widespread exocytosis of inflammatory cells into epithelium and/or frequent epithelial necrosis and intraluminal debris and/or severe, peribronchial/peribronchiolar infiltrates
2.3. Combined Lesion Score
	Extent Score x Severity Score
2.4. Regeneration
0	No	None or Single foci of mild hyperplasia characterized by "piling" and "crowding" up of cells and increased number of mitoses, affecting max. 1% of tissue, (significance questionable)
1	Mild	Mild hyperplasia as above, 2-25 % of tissue affected
2	Moderate	Moderate hyperplasia as above, 25-50 % of tissue affected
3	Marked	Marked hyperplasia as above, 50-75 % of tissue affected
4	Subtotal	Subtota hyperplasiaas above, >75 % of tissue affected
2.5. Total airway lesions score
	Sum of 2.3 - 2.4
3. Vascular lesions
3.1. Extent vasculopathy/vasculitis (endothelialitis, mural and/or perivascular infiltrates)
0	No	No lesions or single vessels with mild inflammation (significance questionable)
1	Mild	2-25 % of vessels affected
2	Moderate	26-50 % of vessels affected
3	Marked	51-75 % of vessels affected
4	Subtotal	> 75 % of vessels affected
3.2. Severity perivascular infiltrates (scored in area of maximal severity)
0	No	No inflammation
1	Minimal	Single vessels with endothelial hypertrophy and few perivascular cells (no continuous cuff)
2	Mild	1-2 cell layers of perivascular cuffs
3	Moderate	3-5 cell layers of perivascular cuffs
4	Marked	> 5 cell layers of perivascular cuffs
3.3. Combined Lesion Score
	Extent Score x Severity Score
3.4. Vascular lesions
0/1	No/Yes	Perivascular edema
0/1	No/Yes	Perivascular hemorrhage
3.5. Total vascular lesions score
	Sum of 3.3 - 3-4
4. Total Lung Lesion Score
	Sum of 1.6 , 2.5, 3.5
1. Immunohistochemistry
1.1. Extent alveolar antigen
0	No	No specific signal, one single immunolabelled cell
1	Mild	Multifocal areas with immunolabelled pneumocytes, 2-25 % of alveoli
2	Moderate	Multifocal areas with immunolabelled pneumocytes, 26-50 % of alveoli
3	Marked	Multifocal areas with immunolabelled pneumocytes, 51-75 % of alveoli
4	Subtotal	Multifocal areas with immunolabelled pneumocytes, > 75 % of alveoli
1.2. Extent airway (bronchi and bronchioli) antigen
0	No	No specific signal, one single immunolabelled cell
1	Mild	Multifocal areas with immunolabelled epithelia, 2-25 % of airways
2	Moderate	Multifocal areas with immunolabelled epithelia, 26-50 % of airways
3	Marked	Multifocal areas with immunolabelled epithelia, 51-75 % of airways
4	Subtotal	Multifocal areas with immunolabelled epithelia, > 75 % of airways
1.3 Total immunohistochemistry score
	Sum of alveolar and airway score

## Sheet: ALL ANIMALS
	Alveolar lesions										Airway lesions					Vascular Lesions						TOTAL SUM
Animal #	Extent	Severity	combined	Damage					Regeneration	subpl fibrosis	Alv. Total	Extent	Severity	combined	Regeneration	Aw Total	extent	severity	combined	Vasc. Lesions		Vasc Total
o-mock-1dpi-61 C	1	2	2	1	0	0	0	1	0	0	4	0	0	0	0	0	0	0	0	0	0	0	4
o-mock-1dpi-62 C	0	0	0	0	0	0	0	0	0	0	0	0	0	0	0	0	0	0	0	0	0	0	0
o-mock-1dpi-63 C	0	0	0	0	0	0	0	0	0	0	0	0	0	0	0	0	0	0	0	0	0	0	0
o-mock-1dpi-64 C	0	0	0	0	0	0	0	0	0	0	0	0	0	0	0	0	0	0	0	0	0	0	0
o-mock-1dpi-65 C	0	0	0	0	0	0	0	0	0	0	0	0	0	0	0	0	0	0	0	0	0	0	0
o-mock-1dpi-66 C	0	0	0	0	0	0	0	0	0	0	0	0	0	0	0	0	0	0	0	0	0	0	0
o-mock-1dpi-67 C	1	1	1	0	0	0	0	0	0	0	1	0	0	0	0	0	0	0	0	0	0	0	1
o-mock-1dpi-68 C	1	2	2	1	0	0	0	1	0	0	4	0	0	0	0	0	0	0	0	0	0	0	4
o-SARS-1dpi-69 C	1	1	1	1	0	0	0	0	0	0	2	2	1	2	0	2	0	0	0	0	0	0	4
o-SARS-1dpi-70 C	0	0	0	0	0	0	0	0	0	0	0	1	1	0	0	0	0	0	0	0	0	0	0
o-SARS-1dpi-71 C	1	1	1	1	0	0	0	0	0	0	2	1	1	1	0	1	0	0	0	0	0	0	3
o-SARS-1dpi-72 C	0	0	0	0	0	0	0	0	0	0	0	0	0	0	0	0	0	0	0	0	0	0	0
o-SARS-1dpi-73 C	1	2	2	1	0	0	0	1	0	0	4	1	1	1	0	1	0	0	0	0	0	0	5
o-SARS-1dpi-74 C	1	2	2	1	0	0	0	1	0	0	4	1	2	2	0	2	0	0	0	0	0	0	6
o-SARS-1dpi-75 C	1	1	1	0	0	0	0	0	0	0	1	0	0	0	0	0	0	0	0	0	0	0	1
o-SARS-1dpi-76 C	1	2	2	1	0	0	0	1	0	0	4	0	0	0	0	0	0	0	0	0	0	0	4
o-mock-3dpi-21 C	1	1	1	0	0	0	0	0	0	0	1	0	0	0	0	0	0	0	0	0	0	0	1
o-mock-3dpi-22 C	0	0	0	0	0	0	0	0	0	0	0	0	0	0	0	0	0	0	0	0	0	0	0
o-mock-3dpi-23 C	0	0	0	0	0	0	0	0	0	0	0	0	0	0	0	0	0	0	0	0	0	0	0
o-mock-3dpi-24 C	0	0	0	0	0	0	0	0	0	0	0	0	0	0	0	0	0	0	0	0	0	0	0
o-mock-3dpi-93 C	0	0	0	0	0	0	0	0	0	0	0	0	0	0	0	0	0	0	0	0	0	0	0
o-mock-3dpi-94 C	1	1	1	0	0	0	0	0	0	0	1	0	0	0	0	0	0	0	0	0	0	0	1
o-mock-3dpi-95 C	0	0	0	0	0	0	0	0	0	0	0	0	0	0	0	0	0	0	0	0	0	0	0
o-mock-3dpi-96 C	0	0	0	0	0	0	0	0	0	0	0	0	0	0	0	0	0	0	0	0	0	0	0
o-SARS-3dpi-25 C	1	1	1	1	0	0	0	0	0	0	2	2	2	4	2	6	1	2	2	0	0	2	10
o-SARS-3dpi-26 C	0	0	0	0	0	0	0	0	0	0	0	1	1	1	1	2	0	0	0	0	0	0	2
o-SARS-3dpi-27 C	1	1	1	0	0	1	0	0	0	0	2	2	2	4	2	6	0	0	0	0	0	0	8
o-SARS-3dpi-28 C	0	0	0	0	0	0	0	0	0	0	0	1	2	2	2	4	1	1	1	0	0	1	5
o-SARS-3dpi-97 C	2	2	4	1	0	1	0	0	1	0	7	1	2	2	1	3	1	2	2	0	0	2	12
o-SARS-3dpi-98 C	1	1	1	1	0	0	0	0	0	0	2	1	1	1	1	2	0	0	0	0	0	0	4
o-SARS-3dpi-99 C	1	2	2	1	0	1	0	0	1	0	5	1	1	1	1	2	1	1	1	0	0	1	8
o-SARS-3dpi-100 C	1	1	1	1	0	0	0	0	0	0	2	1	2	2	2	4	1	1	1	0	0	1	7
o-mock-6dpi-29 C	0	0	0	0	0	0	0	0	0	0	0	0	0	0	0	0	0	0	0	0	0	0	0
o-mock-6dpi-30 C	0	0	0	0	0	0	0	0	0	0	0	0	0	0	0	0	0	0	0	0	0	0	0
o-mock-6dpi-31 C	0	0	0	0	0	0	0	0	0	0	0	0	0	0	0	0	0	0	0	0	0	0	0
o-mock-6dpi-32 C	0	0	0	0	0	0	0	0	0	0	0	0	0	0	0	0	0	0	0	0	0	0	0
o-mock-6dpi-33 C	0	0	0	0	0	0	0	0	0	0	0	1	1	1	0	1	0	0	0	0	0	0	1
o-mock-6dpi-34 C	0	0	0	0	0	0	0	0	0	0	0	0	0	0	0	0	0	0	0	0	0	0	0
o-mock-6dpi-35 C	0	0	0	0	0	0	0	0	0	0	0	0	0	0	0	0	0	0	0	0	0	0	0
o-mock-6dpi-36 C	0	0	0	0	0	0	0	0	0	0	0	0	0	0	0	0	0	0	0	0	0	0	0
o-SARS-6dpi-37 C	2	3	6	1	0	1	0	1	2	0	11	2	2	4	1	5	2	2	4	0	0	4	20
o-SARS-6dpi-38 C	2	2	4	1	0	1	0	0	3	0	9	1	1	1	1	2	2	2	4	0	0	4	15
o-SARS-6dpi-39 C	2	2	4	1	0	1	0	0	3	0	9	1	1	1	1	2	2	2	4	0	0	4	15
o-SARS-6dpi-40 C	2	2	4	1	0	1	0	0	2	0	8	0	0	0	1	1	1	1	1	0	0	1	10
o-SARS-6dpi-41 C	2	2	4	1	0	1	0	0	3	1	10	0	0	0	1	1	2	2	4	0	0	4	15
o-SARS-6dpi-42 C	3	2	6	1	0	1	0	0	3	0	11	1	1	1	1	2	2	2	4	0	0	4	17
o-SARS-6dpi-43 C	2	2	4	1	0	1	0	0	2	0	8	1	1	1	1	2	2	1	2	0	0	2	12
o-SARS-6dpi-44 C	2	2	4	1	0	1	0	0	2	0	8	1	1	1	1	2	2	1	2	0	0	2	12
o-mock-14dpi-45 C	0	0	0	0	0	0	0	0	0	0	0	0	0	0	0	0	0	0	0	0	0	0	0
o-mock-14dpi-46 C	0	0	0	0	0	0	0	0	0	0	0	0	0	0	0	0	0	0	0	0	0	0	0
o-mock-14dpi-47 C	0	0	0	0	0	0	0	0	0	0	0	0	0	0	0	0	0	0	0	0	0	0	0
o-mock-14dpi-48 C	0	0	0	0	0	0	0	0	0	0	0	0	0	0	0	0	0	0	0	0	0	0	0
o-mock-14dpi-49 C	0	0	0	0	0	0	0	0	0	0	0	0	0	0	0	0	0	0	0	0	0	0	0
o-mock-14dpi-50 C	0	0	0	0	0	0	0	0	0	0	0	0	0	0	0	0	0	0	0	0	0	0	0
o-mock-14dpi-51 C	0	0	0	0	0	0	0	0	0	0	0	0	0	0	0	0	0	0	0	0	0	0	0
o-mock-14dpi-52 C	0	0	0	0	0	0	0	0	0	0	0	0	0	0	0	0	0	0	0	0	0	0	0
o-SARS-14dpi-53 C	0	0	0	0	0	0	0	0	2	1	3	0	0	0	0	0	0	0	0	0	0	0	3
o-SARS-14dpi-54 C	0	0	0	0	0	0	0	0	2	1	3	0	0	0	0	0	0	0	0	0	0	0	3
o-SARS-14dpi-55 C	0	0	0	0	0	0	0	0	2	0	2	0	0	0	0	0	1	1	1	0	0	1	3
o-SARS-14dpi-56 C	1	1	1	0	0	0	0	0	2	1	4	0	0	0	0	0	1	2	2	0	1	3	7
o-SARS-14dpi-57 C	0	0	0	0	0	0	0	0	1	1	2	0	0	0	0	0	0	0	0	0	0	0	2
o-SARS-14dpi-58 C	1	1	1	0	0	0	0	0	2	1	4	1	1	1	0	1	3	1	3	0	0	3	8
o-SARS-14dpi-59 C	0	0	0	0	0	0	0	0	2	1	3	0	0	0	0	0	0	0	0	0	0	0	3
o-SARS-14dpi-60 C	0	0	0	0	0	0	0	0	1	0	1	0	0	0	0	0	0	0	0	0	0	0	1
o-mock-28dpi-101 C	0	0	0	0	0	0	0	0	0	0	0	0	0	0	0	0	0	0	0	0	0	0	0
o-mock-28dpi-102 C	0	0	0	0	0	0	0	0	0	0	0	0	0	0	0	0	0	0	0	0	0	0	0
o-mock-28dpi-103 C	0	0	0	0	0	0	0	0	0	0	0	0	0	0	0	0	0	0	0	0	0	0	0
o-mock-28dpi-104 C	0	0	0	0	0	0	0	0	0	0	0	0	0	0	0	0	0	0	0	0	0	0	0
o-mock-28dpi-105 C	0	0	0	0	0	0	0	0	0	0	0	0	0	0	0	0	0	0	0	0	0	0	0
o-mock-28dpi-106 C	0	0	0	0	0	0	0	0	0	0	0	0	0	0	0	0	0	0	0	0	0	0	0
o-mock-28dpi-107 C	0	0	0	0	0	0	0	0	0	0	0	0	0	0	0	0	0	0	0	0	0	0	0
o-mock-28dpi-108 C	0	0	0	0	0	0	0	0	0	0	0	0	0	0	0	0	0	0	0	0	0	0	0
o-SARS-28dpi-109 C	0	0	0	0	0	0	0	0	0	1	1	0	0	0	0	0	0	0	0	0	0	0	1
o-SARS-28dpi-110 C	0	0	0	0	0	0	0	0	2	0	2	0	0	0	0	0	0	0	0	0	0	0	2
o-SARS-28dpi-111 C	0	0	0	0	0	0	0	0	1	0	1	0	0	0	0	0	0	0	0	0	0	0	1
o-SARS-28dpi-112 C	0	0	0	0	0	0	0	0	1	1	2	0	0	0	0	0	0	0	0	0	0	0	2
o-SARS-28dpi-113 C	0	0	0	0	0	0	0	0	1	1	2	0	0	0	0	0	1	1	1	0	0	1	3
o-SARS-28dpi-114 C	0	0	0	0	0	0	0	0	1	0	1	1	1	1	0	1	0	0	0	0	0	0	2
o-SARS-28dpi-115 C	0	0	0	0	0	0	0	0	1	0	1	0	0	0	0	0	0	0	0	0	0	0	1
o-SARS-28dpi-116 C	0	0	0	0	0	0	0	0	1	0	1	0	0	0	0	0	0	0	0	0	0	0	1
o-mock-56dpi-77 C	0	0	0	0	0	0	0	0	0	0	0	0	0	0	0	0	0	0	0	0	0	0	0
o-mock-56dpi-78 C	0	0	0	0	0	0	0	0	0	0	0	0	0	0	0	0	0	0	0	0	0	0	0
o-mock-56dpi-79 C	0	0	0	0	0	0	0	0	0	0	0	0	0	0	0	0	0	0	0	0	0	0	0
o-mock-56dpi-80 C	0	0	0	0	0	0	0	0	0	0	0	0	0	0	0	0	0	0	0	0	0	0	0
o-mock-56dpi-81 C	0	0	0	0	0	0	0	0	0	0	0	0	0	0	0	0	0	0	0	0	0	0	0
o-mock-56dpi-82 C	0	0	0	0	0	0	0	0	0	0	0	0	0	0	0	0	0	0	0	0	0	0	0
o-mock-56dpi-83 C	0	0	0	0	0	0	0	0	0	0	0	0	0	0	0	0	0	0	0	0	0	0	0
o-mock-56dpi-84 C	0	0	0	0	0	0	0	0	0	0	0	0	0	0	0	0	0	0	0	0	0	0	0
o-SARS-56dpi-85 C	0	0	0	0	0	0	0	0	1	1	2	0	0	0	0	0	0	0	0	0	0	0	2
o-SARS-56dpi-86 C	0	0	0	0	0	0	0	0	1	0	1	0	0	0	0	0	0	0	0	0	0	0	1
o-SARS-56dpi-87 C	0	0	0	0	0	0	0	0	2	0	2	1	1	1	0	1	0	0	0	0	0	0	3
o-SARS-56dpi-88 C	0	0	0	0	0	0	0	0	1	0	1	1	1	1	0	1	0	0	0	0	0	0	2
o-SARS-56dpi-90 C	0	0	0	0	0	0	0	0	1	0	1	0	0	0	0	0	0	0	0	0	0	0	1
o-SARS-56dpi-91 C	0	0	0	0	0	0	0	0	0	0	0	0	0	0	0	0	0	0	0	0	0	0	0
o-SARS-56dpi-92 C	0	0	0	0	0	0	0	0	1	0	1	0	0	0	0	0	0	0	0	0	0	0	1
o-mock-112dpi-5 C	0	0	0	0	0	0	0	0	0	0	0	0	0	0	0	0	0	0	0	0	0	0	0
o-mock-112dpi-6 C	0	0	0	0	0	0	0	0	0	0	0	0	0	0	0	0	0	0	0	0	0	0	0
o-mock-112dpi-7 C	0	0	0	0	0	0	0	0	0	0	0	0	0	0	0	0	0	0	0	0	0	0	0
o-mock-112dpi-8 C	0	0	0	0	0	0	0	0	0	0	0	0	0	0	0	0	0	0	0	0	0	0	0
o-mock-112dpi-9 C	0	0	0	0	0	0	0	0	0	0	0	0	0	0	0	0	0	0	0	0	0	0	0
o-mock-112dpi-10 C	0	0	0	0	0	0	0	0	0	0	0	0	0	0	0	0	0	0	0	0	0	0	0
o-mock-112dpi-11 C	0	0	0	0	0	0	0	0	0	0	0	0	0	0	0	0	0	0	0	0	0	0	0
o-mock-112dpi-12 C	0	0	0	0	0	0	0	0	0	0	0	0	0	0	0	0	0	0	0	0	0	0	0
o-SARS-112dpi-13 C	0	0	0	0	0	0	0	0	0	0	0	0	0	0	0	0	0	0	0	0	0	0	0
o-SARS-112dpi-14 C	0	0	0	0	0	0	0	0	1	1	2	0	0	0	0	0	0	0	0	0	0	0	2
o-SARS-112dpi-15 C	0	0	0	0	0	0	0	0	1	0	1	0	0	0	0	0	0	0	0	0	0	0	1
o-SARS-112dpi-16 C	0	0	0	0	0	0	0	0	1	0	1	0	0	0	0	0	0	0	0	0	0	0	1
o-SARS-112dpi-17 C	0	0	0	0	0	0	0	0	1	0	1	0	0	0	0	0	0	0	0	0	0	0	1
o-SARS-112dpi-18 C	0	0	0	0	0	0	0	0	1	0	1	0	0	0	0	0	0	1	1	0	0	1	2
o-SARS-112dpi-19 C	0	0	0	0	0	0	0	0	1	1	2	0	0	0	0	0	0	0	0	0	0	0	2
o-SARS-112dpi-20 C	0	0	0	0	0	0	0	0	1	0	1	0	0	0	0	0	0	0	0	0	0	0	1

## Sheet: ONLY SARS
	Alveolar lesions										Airway lesions					Vascular Lesions						TOTAL SUM
Animal #	Extent	Severity	combined	Damage					Regeneration	subpl fibrosis	Alv. Total	Extent	Severity	combined	Regeneration	Aw Total	extent	severity	combined	Vasc. Lesions		Vasc Total
o-SARS-1dpi-69 C	1	1	1	1	0	0	0	0	0	0	2	2	1	2	0	2	0	0	0	1	0	1	5
o-SARS-1dpi-70 C	0	0	0	0	0	0	0	0	0	0	0	1	1	0	0	0	0	0	0	1	0	1	1
o-SARS-1dpi-71 C	1	1	1	1	0	0	0	0	0	0	2	1	1	1	0	1	0	0	0	1	0	1	4
o-SARS-1dpi-72 C	0	0	0	0	0	0	0	0	0	0	0	0	0	0	0	0	0	0	0	0	0	0	0
o-SARS-1dpi-73 C	1	2	2	1	0	0	0	1	0	0	4	1	1	1	0	1	0	0	0	1	0	1	6
o-SARS-1dpi-74 C	1	2	2	1	0	0	0	1	0	0	4	1	2	2	0	2	0	0	0	1	0	1	7
o-SARS-1dpi-75 C	1	1	1	0	0	0	0	0	0	0	1	0	0	0	0	0	0	0	0	1	0	1	2
o-SARS-1dpi-76 C	1	2	2	1	0	0	0	1	0	0	4	0	0	0	0	0	0	0	0	1	0	1	5
o-SARS-3dpi-25 C	1	1	1	1	0	0	0	0	0	0	2	2	2	4	2	6	1	2	2	1	0	3	11
o-SARS-3dpi-26 C	0	0	0	0	0	0	0	0	0	0	0	1	1	1	1	2	0	0	0	1	0	1	3
o-SARS-3dpi-27 C	1	1	1	0	0	1	0	0	0	0	2	2	2	4	2	6	0	0	0	1	0	1	9
o-SARS-3dpi-28 C	0	0	0	0	0	0	0	0	0	0	0	1	2	2	2	4	1	1	1	1	0	2	6
o-SARS-3dpi-97 C	2	2	4	1	0	1	0	0	1	0	7	1	2	2	1	3	1	2	2	1	0	3	13
o-SARS-3dpi-98 C	1	1	1	1	0	0	0	0	0	0	2	1	1	1	1	2	0	0	0	1	0	1	5
o-SARS-3dpi-99 C	1	2	2	1	0	1	0	0	1	0	5	1	1	1	1	2	1	1	1	1	0	2	9
o-SARS-3dpi-100 C	1	1	1	1	0	0	0	0	0	0	2	1	2	2	2	4	1	1	1	1	0	2	8
o-SARS-6dpi-37 C	2	3	6	1	0	1	0	1	2	0	11	2	2	4	1	5	2	2	4	1	0	5	21
o-SARS-6dpi-38 C	2	2	4	1	0	1	0	0	3	0	9	1	1	1	1	2	2	2	4	1	0	5	16
o-SARS-6dpi-39 C	2	2	4	1	0	1	0	0	3	0	9	1	1	1	1	2	2	2	4	1	0	5	16
o-SARS-6dpi-40 C	2	2	4	1	0	1	0	0	2	0	8	0	0	0	1	1	1	1	1	1	0	2	11
o-SARS-6dpi-41 C	2	2	4	1	0	1	0	0	3	1	10	0	0	0	1	1	2	2	4	1	0	5	16
o-SARS-6dpi-42 C	3	2	6	1	0	1	0	0	3	0	11	1	1	1	1	2	2	2	4	1	0	5	18
o-SARS-6dpi-43 C	2	2	4	1	0	1	0	0	2	0	8	1	1	1	1	2	2	1	2	1	0	3	13
o-SARS-6dpi-44 C	2	2	4	1	0	1	0	0	2	0	8	1	1	1	1	2	2	1	2	1	0	3	13
o-SARS-14dpi-53 C	0	0	0	0	0	0	0	0	2	1	3	0	0	0	0	0	0	0	0	1	0	1	4
o-SARS-14dpi-54 C	0	0	0	0	0	0	0	0	2	1	3	0	0	0	0	0	0	0	0	1	0	1	4
o-SARS-14dpi-55 C	0	0	0	0	0	0	0	0	2	0	2	0	0	0	0	0	1	1	1	1	0	2	4
o-SARS-14dpi-56 C	1	1	1	0	0	0	0	0	2	1	4	0	0	0	0	0	1	2	2	1	1	4	8
o-SARS-14dpi-57 C	0	0	0	0	0	0	0	0	1	1	2	0	0	0	0	0	0	0	0	1	0	1	3
o-SARS-14dpi-58 C	1	1	1	0	0	0	0	0	2	1	4	1	1	1	0	1	3	1	3	1	0	4	9
o-SARS-14dpi-59 C	0	0	0	0	0	0	0	0	2	1	3	0	0	0	0	0	0	0	0	1	0	1	4
o-SARS-14dpi-60 C	0	0	0	0	0	0	0	0	1	0	1	0	0	0	0	0	0	0	0	1	0	1	2
o-SARS-28dpi-109 C	0	0	0	0	0	0	0	0	0	1	1	0	0	0	0	0	0	0	0	1	0	1	2
o-SARS-28dpi-110 C	0	0	0	0	0	0	0	0	2	0	2	0	0	0	0	0	0	0	0	1	0	1	3
o-SARS-28dpi-111 C	0	0	0	0	0	0	0	0	1	0	1	0	0	0	0	0	0	0	0	1	0	1	2
o-SARS-28dpi-112 C	0	0	0	0	0	0	0	0	1	1	2	0	0	0	0	0	0	0	0	1	0	1	3
o-SARS-28dpi-113 C	0	0	0	0	0	0	0	0	1	1	2	0	0	0	0	0	1	1	1	1	0	2	4
o-SARS-28dpi-114 C	0	0	0	0	0	0	0	0	1	0	1	1	1	1	0	1	0	0	0	1	0	1	3
o-SARS-28dpi-115 C	0	0	0	0	0	0	0	0	1	0	1	0	0	0	0	0	0	0	0	1	0	1	2
o-SARS-28dpi-116 C	0	0	0	0	0	0	0	0	1	0	1	0	0	0	0	0	0	0	0	1	0	1	2
o-SARS-56dpi-85 C	0	0	0	0	0	0	0	0	1	1	2	0	0	0	0	0	0	0	0	1	0	1	3
o-SARS-56dpi-86 C	0	0	0	0	0	0	0	0	1	0	1	0	0	0	0	0	0	0	0	1	0	1	2
o-SARS-56dpi-87 C	0	0	0	0	0	0	0	0	2	0	2	1	1	1	0	1	0	0	0	1	0	1	4
o-SARS-56dpi-88 C	0	0	0	0	0	0	0	0	1	0	1	1	1	1	0	1	0	0	0	1	0	1	3
o-SARS-56dpi-90 C	0	0	0	0	0	0	0	0	1	0	1	0	0	0	0	0	0	0	0	1	0	1	2
o-SARS-56dpi-91 C	0	0	0	0	0	0	0	0	0	0	0	0	0	0	0	0	0	0	0	1	0	1	1
o-SARS-56dpi-92 C	0	0	0	0	0	0	0	0	1	0	1	0	0	0	0	0	0	0	0	1	0	1	2
o-SARS-112dpi-13 C	0	0	0	0	0	0	0	0	0	0	0	0	0	0	0	0	0	0	0	1	0	1	1
o-SARS-112dpi-14 C	0	0	0	0	0	0	0	0	1	1	2	0	0	0	0	0	0	0	0	1	0	1	3
o-SARS-112dpi-15 C	0	0	0	0	0	0	0	0	1	0	1	0	0	0	0	0	0	0	0	1	0	1	2
o-SARS-112dpi-16 C	0	0	0	0	0	0	0	0	1	0	1	0	0	0	0	0	0	0	0	1	0	1	2
o-SARS-112dpi-17 C	0	0	0	0	0	0	0	0	1	0	1	0	0	0	0	0	0	0	0	1	0	1	2
o-SARS-112dpi-18 C	0	0	0	0	0	0	0	0	1	0	1	0	0	0	0	0	0	1	1	1	0	2	3
o-SARS-112dpi-19 C	0	0	0	0	0	0	0	0	1	1	2	0	0	0	0	0	0	0	0	1	0	1	3
o-SARS-112dpi-20 C	0	0	0	0	0	0	0	0	1	0	1	0	0	0	0	0	0	0	0	1	0	1	2
