# Supplementary material for: Respiratory long COVID in aged hamsters features impaired lung function post-exercise with bronchiolization and fibrosis
Source: Nat Commun. 2025 Feb 28;16:2080. doi: 10.1038/s41467-025-57267-x (PMC11871369; doi:10.1038/s41467-025-57267-x)
Supplement: Supplementary file 7 — Supplementary Data 5 [file 41467_2025_57267_MOESM7_ESM.xlsx]

## Sheet: HE analysis
	HE stained sections - analysis: - means no changes visible; na means not applicable;
Heart	mid section	high section
o-m-1dpi-61D	-	-
o-m-1dpi-62D	-	-
o-m-1dpi-63D	-	-
o-m-1dpi-64D	-	-
o-m-1dpi-65D	-	-
o-m-1dpi-66D	-	-
o-m-1dpi-67D	-	-
o-m-1dpi-68D	-	-
o-s-1dpi-69D	-	-
o-s-1dpi-70D	focal microthrombus	-
o-s-1dpi-71D	-	valve area: focal mineralization
o-s-1dpi-72D	-	upper right ventricle: focal subepicardial hypercellularity
o-s-1dpi-73D	-	-
o-s-1dpi-74D		Region of nodus sinuatrialis: focal, mild, perivascular, lymphohistiocytic inflammation; auriculum: focal, mild lymphocytic and neutrophilic infiltration;
o-s-1dpi-75D	-	-
o-s-1dpi-76D	-	-
o-m-3dpi-21D	-	-
o-m-3dpi-22D	-	-
o-m-3dpi-23D	-	-
o-m-3dpi-24D	-	-
o-m-3dpi-93D	-	valve area: focal mineralization
o-m-3dpi-94D	-	-
o-m-3dpi-95D	-	-
o-m-3dpi-96D	-	-
o-s-3dpi-25D	-	-
o-s-3dpi-26D	-	-
o-s-3dpi-27D	-	-
o-s-3dpi-28D	-	Start of septum: focal thrombus;
o-s-3dpi-97D	-	-
o-s-3dpi-98D	-	right ventricle: focal, minimal lymphocytic infiltration
o-s-3dpi-99D	-	-
o-s-3dpi-100D	right ventricle: focal, minimal, perivascular, lymphocytic infiltration	-
o-m-6dpi-29D	-	-
o-m-6dpi-30D	-	Nodus sinuatrialis: focal, mild, plasmacytic infiltration
o-m-6dpi-31D	-	-
o-m-6dpi-32D	Septum: focal decreased staining intensity, could be artefact;	-
o-m-6dpi-33D	-	-
o-m-6dpi-34D	-	-
o-m-6dpi-35D	-	-
o-m-6dpi-36D	-	-
o-s-6dpi-37D	-	-
o-s-6dpi-38D	-	-
o-s-6dpi-39D	-	focally above the atrioventricular valve: mild plasmacytic infiltration
o-s-6dpi-40D	-	sinuatrial node: mild hypercellularity
o-s-6dpi-41D		upper right venticle / atrium: multifocal, extensive supepicardial lymphocytic infiltration with fibrosis; nodus sinuatrialis: focal, mild hypercellularity, focal neuronal loss
o-s-6dpi-42D	-	-
o-s-6dpi-43D	-	right ventricle to septum: multifocal, subepicardial, mild to moderate lymphohistiocytic infiltration
o-s-6dpi-44D	-	-
o-m-14dpi-45D	-	-
o-m-14dpi-46D	right ventricle: focal, subepicardial, mild to moderate, infiltration with neutrophils, macrophages, lymphocytes and myocardial necrosis;	Right atrial wall: mild, subepicardial, lymphiohistiocytic infiltration
o-m-14dpi-47D	-	-
o-m-14dpi-48D	-	-
o-m-14dpi-49D	-	-
o-m-14dpi-50D	-	-
o-m-14dpi-51D	-	-
o-m-14dpi-52D	n.a.	n.a.
o-s-14dpi-53D	-	-
o-s-14dpi-54D	-	-
o-s-14dpi-55D	Left ventricle: focal, perivascular infiltration with single inflammatory cells (neutrophils, macrophages	-
o-s-14dpi-56D	-	-
o-s-14dpi-57D	-	-
o-s-14dpi-58D	-	-
o-s-14dpi-59D	-	-
o-s-14dpi-60D	-	-
o-m-28dpi-101D	-	Auriculum: focal, mild, perivascular lymphoplasmacytic and histiocytic inflammation
o-m-28dpi-102D	Right ventricle: focal, perivascular fibrosis	Valve region: focal, mild hypercellularity;
o-m-28dpi-103D	-
o-m-28dpi-104D	-	Valve: focal mineralization/chondroid material; Nodus sinuatrialis: hypercellular appereance;
o-m-28dpi-105D	-	-
o-m-28dpi-106D	-	-
o-m-28dpi-107D	-	-
o-m-28dpi-108D	-	-
o-s-28dpi-109D	-	-
o-s-28dpi-110D	-	Right ventricle: focal, subepicardial, mild, perivascular increased amount of fibroblasts/collagen fibers;
o-s-28dpi-111D	-	Septum: focal mineralization; Left ventricular valve: gold-brown pigment;
o-s-28dpi-112D	-	-
o-s-28dpi-113D	-	-
o-s-28dpi-114D	-	Valve: focal mineralization/chondroid material;
o-s-28dpi-115D	-	-
o-s-28dpi-116D	-	-
o-m-56dpi-77D	-	focal thrombus
o-m-56dpi-78D	-	Auriculum: focal, mild, lymphohistiocytic infiltration;
o-m-56dpi-79D	-	-
o-m-56dpi-80D	-	-
o-m-56dpi-81D	-	Upper right ventricle: focal increased hypereosinophilia with loss of tissue architecture (could be artefact);
o-m-56dpi-82D	-	-
o-m-56dpi-83D	-	-
o-m-56dpi-84D	-	-
o-s-56dpi-85D	-	Septum: focal, mild infiltration with lymphocytes and neutrophils;
o-s-56dpi-86D	Left ventricle: multifocal, mild, perivascular fibrosis;	-
o-s-56dpi-87D	Right ventricle: focal lympho(histio)cytic infiltration;	-
o-s-56dpi-88D	-	Right ventricle: focal hemorrhage
o-s-56dpi-89D	-	-
o-s-56dpi-90D	-	-
o-s-56dpi-91D	-	-
o-s-56dpi-92D	Left ventricle: focal myocardial necrosis with inflammation; Right ventricle: multifocal, mild to moderate. subepicardial lymphoplasmahistiocytic inflammation, few neutrophils, with fibrosis (granulation tissue formation,)	-
o-m-112dpi-5D	-	-
o-m-112dpi-6D	-	-
o-m-112dpi-7D	-	-
o-m-112dpi-8D	-	-
o-m-112dpi-9D	-	-
o-m-112dpi-10D	-	-
o-m-112dpi-11D	-	-
o-m-112dpi-12D	-	-
o-s-112dpi-13D	-	-
o-s-112dpi-14D	-	-
o-s-112dpi-15D	right ventricle: focal, suepicardial hypercellularity;	-
o-s-112dpi-16D	-	-
o-s-112dpi-17D	-	-
o-s-112dpi-18D	-	-
o-s-112dpi-19D	-	Fatty tissue adjacent to right ventricle: moderate, focal, lymphoplasmacytic inflammation;
