# Supplementary material for: Respiratory long COVID in aged hamsters features impaired lung function post-exercise with bronchiolization and fibrosis
Source: Nat Commun. 2025 Feb 28;16:2080. doi: 10.1038/s41467-025-57267-x (PMC11871369; doi:10.1038/s41467-025-57267-x)
Supplement: Supplementary file 8 — Supplementary Data 6 [file 41467_2025_57267_MOESM8_ESM.xlsx]

## Sheet: Kidney HE + Azan
Animal ID	Evaluation kidney (Block E)
	HE	Azan		Azan scoring
o-mock-1dpi-61	ob	0		0= normal amount
o-mock-1dpi-62	mild, fok. dilated tubules	0		1= mildly increased amount
o-mock-1dpi-63	mild, mf tubular degeneration (vacuolization of tubular epithelium)	0		2= moderately increased amount
o-mock-1dpi-64	focal chronic infarct	1
o-mock-1dpi-65	ob	0
o-mock-1dpi-66	ob	1
o-mock-1dpi-67	ob	0
o-mock-1dpi-68	mild, mf, vacuolization of glomeruli	1
o-SARS-1dpi-69	focal chronic infarct	1
o-SARS-1dpi-70	mild, mf tubular degeneration (vacuolization of tubular epithelium)	0
o-SARS-1dpi-71	ob	0
o-SARS-1dpi-72	ob	0
o-SARS-1dpi-73	mild, fok. dilated tubules	1
o-SARS-1dpi-74	mild, mf dilated tubules	1
o-SARS-1dpi-75	ob	1
o-SARS-1dpi-76	ob	0
o-mock-3dpi-21	ob	0
o-mock-3dpi-22	mild, mf, vacuolization of glomeruli	1
o-mock-3dpi-23	ob	0
o-mock-3dpi-24	ob	1
o-SARS-3dpi-25	ob	1
o-SARS-3dpi-26	mild, mf dilated tubules mild, mf tubular degeneration (vacuolization of tubular epithelium)	1
o-SARS-3dpi-27	ob	0
o-SARS-3dpi-28	ob	1
o-mock-3dpi-93	ob	0
o-mock-3dpi-94	ob	0
o-mock-3dpi-95	ob	0
o-mock-3dpi-96	multifocal chronic infarcts	1
o-SARS-3dpi-97	ob	0
o-SARS-3dpi-98	ob	0
o-SARS-3dpi-99	ob	0
o-SARS-3dpi-100	mild, mf dilated tubules	1
o-mock-6dpi-29	ob	0
o-mock-6dpi-30	ob	1
o-mock-6dpi-31	mild, mf dilated tubules	1
o-mock-6dpi-32	mild, focal tubular degeneration (vacuolization of tubular epithelium)	1
o-mock-6dpi-33	ob	0
o-mock-6dpi-34	ob	0
o-mock-6dpi-35	mild, mf dilated tubules	1
o-mock-6dpi-36	ob	0
o-SARS-6dpi-37	ob	0
o-SARS-6dpi-38	mild, mf, vacuolization of glomeruli	1
o-SARS-6dpi-39	ob	0
o-SARS-6dpi-40	ob	0
o-SARS-6dpi-41	ob	0
o-SARS-6dpi-42	ob	0
o-SARS-6dpi-43	ob	0
o-SARS-6dpi-44	mild, mf dilated tubules	0
o-mock-14dpi-45	ob	0
o-mock-14dpi-46	ob	1
o-mock-14dpi-47	ob	0
o-mock-14dpi-48	ob	0
o-mock-14dpi-49	ob	0
o-mock-14dpi-50	mild, mf dilated tubules	1
o-mock-14dpi-51	mild, mf dilated tubules	1
o-mock-14dpi-52	mild, mf, vacuolization of glomeruli mild, mf tubular degeneration (vacuolization of tubular epithelium)	0
o-SARS-14dpi-53	ob	0
o-SARS-14dpi-54	ob	0
o-SARS-14dpi-55	ob	0
o-SARS-14dpi-56	mild, mf dilated tubules	1
o-SARS-14dpi-57	focal chronic infarct	1
o-SARS-14dpi-58	ob	0
o-SARS-14dpi-59	ob	0
o-SARS-14dpi-60	ob	0
o-mock-28dpi-101	ob	1
o-mock-28dpi-102	ob	0
o-mock-28dpi-103	ob	0
o-mock-28dpi-104	mild, mf tubular degeneration (vacuolization of tubular epithelium)	1
o-mock-28dpi-105	mild, mf, vacuolization of glomeruli mild, mf tubular degeneration (vacuolization of tubular epithelium)	1
o-mock-28dpi-106	ob	0
o-mock-28dpi-107	mild, mf dilated tubules	1
o-mock-28dpi-108	ob	1
o-SARS-28dpi-109	ob	0
o-SARS-28dpi-110	mild, mf dilated tubules mild, mf tubular degeneration (vacuolization of tubular epithelium)	1
o-SARS-28dpi-111	ob	0
o-SARS-28dpi-112	ob	0
o-SARS-28dpi-113	ob	0
o-SARS-28dpi-114	mild, mf tubular degeneration (vacuolization of tubular epithelium)	0
o-SARS-28dpi-115	ob	0
o-SARS-28dpi-116	ob	0
o-mock-56dpi-77	ob	1
o-mock-56dpi-78	mild, mf, vacuolization of glomeruli	0
o-mock-56dpi-79	mild, mf, vacuolization of glomeruli	0
o-mock-56dpi-80	ob	0
o-mock-56dpi-81	ob	1
o-mock-56dpi-82	mild, fok. dilated tubules	0
o-mock-56dpi-83	ob	0
o-mock-56dpi-84	mild, mf, vacuolization of glomeruli mild, mf tubular degeneration (vacuolization of tubular epithelium)	1
o-SARS-56dpi-85	ob	0
o-SARS-56dpi-86	mild, mf, vacuolization of glomeruli	0
o-SARS-56dpi-87	mf chronic infarcts	1
o-SARS-56dpi-88	ob	1
o-SARS-56dpi-89
o-SARS-56dpi-90	ob	1
o-SARS-56dpi-91	mild, mf tubular degeneration (vacuolization of tubular epithelium)	0
o-SARS-56dpi-92	ob	0
o-mock-112dpi-5	ob	0
o-mock-112dpi-6	ob	1
o-mock-112dpi-7	ob	0
o-mock-112dpi-8	ob	0
o-mock-112dpi-9	ob	0
o-mock-112dpi-10	mild, mf tubular degeneration (vacuolization of tubular epithelium)	0
o-mock-112dpi-11	ob	0
o-mock-112dpi-12	mild, mf tubular degeneration (vacuolization of tubular epithelium)	1
o-SARS-112dpi-13	mild, fok. dilated tubules	1
o-SARS-112dpi-14	ob	0
o-SARS-112dpi-15	ob	0
o-SARS-112dpi-16	ob	0
o-SARS-112dpi-17	ob	0
o-SARS-112dpi-18	ob	0
o-SARS-112dpi-19	focal chronic infarct; adrenal: nodular hyperplasia	1
o-SARS-112dpi-20	ob	0

## Sheet: kidney  IHC
Animal ID	Evaluation kidney (Block E)
	SARS-CoV-2	Iba-1	CD3	MPO
o-mock-1dpi-61	0	1	1	1	IHC scoring
o-mock-1dpi-62	0	1	1	1	0= no positive cells
o-mock-1dpi-63	0	2	1	1	1= single positive cells
o-mock-1dpi-64	0	2	1 (Fett 2)	1	2= low numbers of positive cells
o-mock-1dpi-65	0	1	1	1	3= moderate numbers of positive cells
o-mock-1dpi-66	0	2	1	1	4= high numbers of positive cells
o-mock-1dpi-67	0	1	1	1
o-mock-1dpi-68	0	1	1	1
o-SARS-1dpi-69	0	2	1	1
o-SARS-1dpi-70	0	1	1	1
o-SARS-1dpi-71	0	1	1	1
o-SARS-1dpi-72	0	2	1	1
o-SARS-1dpi-73	0	1	1	1
o-SARS-1dpi-74	0	2	1	1
o-SARS-1dpi-75	0	2	1	1
o-SARS-1dpi-76	0	1	1	1
o-mock-3dpi-21	0	1	1	1
o-mock-3dpi-22	0	2	1	1
o-mock-3dpi-23	0	1	1	1
o-mock-3dpi-24	0	1	1	1
o-SARS-3dpi-25	0	1	1	1
o-SARS-3dpi-26	0	2	1	1
o-SARS-3dpi-27	0	1	1	1
o-SARS-3dpi-28	0	1	1	1
o-mock-3dpi-93	0	1	1	1
o-mock-3dpi-94	0	2	1	1
o-mock-3dpi-95	0	1	1	1
o-mock-3dpi-96	0	2	2	1
o-SARS-3dpi-97	0	1	1	1
o-SARS-3dpi-98	0	1	1	1
o-SARS-3dpi-99	0	1	1	1
o-SARS-3dpi-100	0	2	1	1
o-mock-6dpi-29	0	1	1	1
o-mock-6dpi-30	0	2	1	1
o-mock-6dpi-31	0	2	1	1
o-mock-6dpi-32	0	2	1	1
o-mock-6dpi-33	0	1	1	1
o-mock-6dpi-34	0	1	1	1
o-mock-6dpi-35	0	1	1	1
o-mock-6dpi-36	0	1	1	1
o-SARS-6dpi-37	0	2	2	1
o-SARS-6dpi-38	0	2	1	1
o-SARS-6dpi-39	0	1	1	1
o-SARS-6dpi-40	0	1	1	1
o-SARS-6dpi-41	0	1	1	1
o-SARS-6dpi-42	0	1	1	1
o-SARS-6dpi-43	0	1	1	1
o-SARS-6dpi-44	0	1	1	1
o-mock-14dpi-45	0	1	1	1
o-mock-14dpi-46	0	2	1	1
o-mock-14dpi-47	0	2	1	1
o-mock-14dpi-48	0	1	1	1
o-mock-14dpi-49	0	1	1	1
o-mock-14dpi-50	0	2	1	1
o-mock-14dpi-51	0	2	1	1
o-mock-14dpi-52	0	1	1	1
o-SARS-14dpi-53	0	2	1	1
o-SARS-14dpi-54	0	2	1	1
o-SARS-14dpi-55	0	1	1	1
o-SARS-14dpi-56	0	3	1	1
o-SARS-14dpi-57	0	2	2	1
o-SARS-14dpi-58	0	1	1	1
o-SARS-14dpi-59	0	1	1	1
o-SARS-14dpi-60	0	2	2	1
o-mock-28dpi-101	0	1	1	1
o-mock-28dpi-102	0	1	1	1
o-mock-28dpi-103	0	1	1	1
o-mock-28dpi-104	0	2	2	1
o-mock-28dpi-105	0	2	1	1
o-mock-28dpi-106	0	1	1	1
o-mock-28dpi-107	0	2	1	1
o-mock-28dpi-108	0	2	1	1
o-SARS-28dpi-109	0	1	1	1
o-SARS-28dpi-110	0	2	1	1
o-SARS-28dpi-111	0	1	1	1
o-SARS-28dpi-112	0	1	1	1
o-SARS-28dpi-113	0	1	1	1
o-SARS-28dpi-114	0	2	1	1
o-SARS-28dpi-115	0	2	1	1
o-SARS-28dpi-116	0	1	1	1
o-mock-56dpi-77	0	2	2	1
o-mock-56dpi-78	0	1	1	1
o-mock-56dpi-79	0	1	1	1
o-mock-56dpi-80	0	1	1	1
o-mock-56dpi-81	0	2	1	1
o-mock-56dpi-82	0	1	1	1
o-mock-56dpi-83	0	1	1	1
o-mock-56dpi-84	0	1	1	1
o-SARS-56dpi-85	0	1	1	1
o-SARS-56dpi-86	0	1	1	1
o-SARS-56dpi-87	0	3	2	1
o-SARS-56dpi-88	0	1	1	1
o-SARS-56dpi-89
o-SARS-56dpi-90	0	1	1	1
o-SARS-56dpi-91	0	1	1	1
o-SARS-56dpi-92	0	1	1	1
o-mock-112dpi-5	0	1	1	1
o-mock-112dpi-6	0	3	2	1
o-mock-112dpi-7	0	1	1	1
o-mock-112dpi-8	0	1	1	1
o-mock-112dpi-9	0	1	1	1
o-mock-112dpi-10	0	1	1	1
o-mock-112dpi-11	0	2	2	1
o-mock-112dpi-12	0	1	1	1
o-SARS-112dpi-13	0	3	2	1
o-SARS-112dpi-14	0	1	1	1
o-SARS-112dpi-15	0	2	1	1
o-SARS-112dpi-16	0	1	1	1
o-SARS-112dpi-17	0	1	1	1
o-SARS-112dpi-18	0	2	1	1
o-SARS-112dpi-19	0	1	2	1
o-SARS-112dpi-20	0	1	1	1

## Sheet: spleen HE+IHC
Animal ID	Evaluation spleen (Block N)
	HE	SARS-CoV-2
o-mock-1dpi-61	ob
o-mock-1dpi-62	ob
o-mock-1dpi-63	ob
o-mock-1dpi-64	ob
o-mock-1dpi-65	ob
o-mock-1dpi-66	ob
o-mock-1dpi-67	ob
o-mock-1dpi-68	ob
o-SARS-1dpi-69	ob
o-SARS-1dpi-70	ob
o-SARS-1dpi-71	ob
o-SARS-1dpi-72	ob
o-SARS-1dpi-73	ob
o-SARS-1dpi-74	ob
o-SARS-1dpi-75	ob
o-SARS-1dpi-76	ob
o-mock-3dpi-21	ob
o-mock-3dpi-22	ob
o-mock-3dpi-23	ob
o-mock-3dpi-24	ob
o-SARS-3dpi-25	ob
o-SARS-3dpi-26	ob
o-SARS-3dpi-27	ob
o-SARS-3dpi-28	ob
o-mock-3dpi-93	ob
o-mock-3dpi-94	ob
o-mock-3dpi-95	ob
o-mock-3dpi-96	ob
o-SARS-3dpi-97	ob
o-SARS-3dpi-98	ob
o-SARS-3dpi-99	ob
o-SARS-3dpi-100	ob
o-mock-6dpi-29	ob
o-mock-6dpi-30	ob
o-mock-6dpi-31	ob
o-mock-6dpi-32	ob
o-mock-6dpi-33	ob
o-mock-6dpi-34	ob
o-mock-6dpi-35	ob
o-mock-6dpi-36	ob
o-SARS-6dpi-37	ob
o-SARS-6dpi-38	ob
o-SARS-6dpi-39	ob
o-SARS-6dpi-40	ob
o-SARS-6dpi-41	ob
o-SARS-6dpi-42	ob
o-SARS-6dpi-43	ob
o-SARS-6dpi-44	ob
o-mock-14dpi-45	ob
o-mock-14dpi-46	ob
o-mock-14dpi-47	ob
o-mock-14dpi-48	ob
o-mock-14dpi-49	ob
o-mock-14dpi-50	ob
o-mock-14dpi-51	ob
o-mock-14dpi-52	ob
o-SARS-14dpi-53	ob
o-SARS-14dpi-54	ob
o-SARS-14dpi-55	ob
o-SARS-14dpi-56	ob
o-SARS-14dpi-57	ob
o-SARS-14dpi-58	ob
o-SARS-14dpi-59	ob
o-SARS-14dpi-60	ob
o-mock-28dpi-101	ob
o-mock-28dpi-102	ob
o-mock-28dpi-103	ob
o-mock-28dpi-104	ob
o-mock-28dpi-105	ob
o-mock-28dpi-106	ob
o-mock-28dpi-107	ob
o-mock-28dpi-108	ob
o-SARS-28dpi-109	ob
o-SARS-28dpi-110	ob
o-SARS-28dpi-111	ob
o-SARS-28dpi-112	ob
o-SARS-28dpi-113	ob
o-SARS-28dpi-114	ob
o-SARS-28dpi-115	ob
o-SARS-28dpi-116	ob
o-mock-56dpi-77	ob
o-mock-56dpi-78	ob
o-mock-56dpi-79	ob
o-mock-56dpi-80	ob
o-mock-56dpi-81	ob
o-mock-56dpi-82	ob
o-mock-56dpi-83	ob
o-mock-56dpi-84	ob
o-SARS-56dpi-85	ob
o-SARS-56dpi-86	ob
o-SARS-56dpi-87	ob
o-SARS-56dpi-88	ob
o-SARS-56dpi-89
o-SARS-56dpi-90	ob
o-SARS-56dpi-91	ob
o-SARS-56dpi-92	ob
o-mock-112dpi-5	ob
o-mock-112dpi-6	ob
o-mock-112dpi-7	ob
o-mock-112dpi-8	ob
o-mock-112dpi-9	ob
o-mock-112dpi-10	ob
o-mock-112dpi-11	ob
o-mock-112dpi-12	ob
o-SARS-112dpi-13	ob
o-SARS-112dpi-14	ob
o-SARS-112dpi-15	ob
o-SARS-112dpi-16	ob
o-SARS-112dpi-17	ob
o-SARS-112dpi-18	ob
o-SARS-112dpi-19	ob
o-SARS-112dpi-20	ob

## Sheet: liver HE+IHC
Animal ID	Evaluation liver (Block M)
	HE	SARS-CoV-2
o-mock-1dpi-61	ob
o-mock-1dpi-62	ob
o-mock-1dpi-63	ob
o-mock-1dpi-64	ob
o-mock-1dpi-65	ob
o-mock-1dpi-66	ob
o-mock-1dpi-67	ob
o-mock-1dpi-68	ob
o-SARS-1dpi-69	ob
o-SARS-1dpi-70	ob
o-SARS-1dpi-71	ob
o-SARS-1dpi-72	ob
o-SARS-1dpi-73	ob
o-SARS-1dpi-74	mild, periportal, lymphohistiocytic Hepatitis
o-SARS-1dpi-75	ob
o-SARS-1dpi-76	ob
o-mock-3dpi-21	na
o-mock-3dpi-22	na
o-mock-3dpi-23	na
o-mock-3dpi-24	na
o-mock-3dpi-93	ob
o-mock-3dpi-94	mild, periportal, lymphohistiocytic hepatitis and cholecystitis
o-mock-3dpi-95	ob
o-mock-3dpi-96	ob
o-SARS-3dpi-25	na
o-SARS-3dpi-26	na
o-SARS-3dpi-27	na
o-SARS-3dpi-28	na
o-SARS-3dpi-97	ob
o-SARS-3dpi-98	ob
o-SARS-3dpi-99	ob
o-SARS-3dpi-100	mild, periportal, lymphohistiocytic Hepatitis
o-mock-6dpi-29	ob
o-mock-6dpi-30	ob
o-mock-6dpi-31	ob
o-mock-6dpi-32	ob
o-mock-6dpi-33	ob
o-mock-6dpi-34	ob
o-mock-6dpi-35	ob
o-mock-6dpi-36	ob
o-SARS-6dpi-37	ob
o-SARS-6dpi-38	ob
o-SARS-6dpi-39	ob
o-SARS-6dpi-40	ob
o-SARS-6dpi-41	ob
o-SARS-6dpi-42	ob
o-SARS-6dpi-43	ob
o-SARS-6dpi-44	ob
o-mock-14dpi-45	ob
o-mock-14dpi-46	ob
o-mock-14dpi-47	ob
o-mock-14dpi-48	ob
o-mock-14dpi-49	ob
o-mock-14dpi-50	ob
o-mock-14dpi-51	ob
o-mock-14dpi-52	ob
o-SARS-14dpi-53	ob
o-SARS-14dpi-54	ob
o-SARS-14dpi-55	ob
o-SARS-14dpi-56	ob
o-SARS-14dpi-57	ob
o-SARS-14dpi-58	ob
o-SARS-14dpi-59	ob
o-SARS-14dpi-60	mild, periportal, lymphohistiocytic Hepatitis with pigment storage within hepatocytes and kupffer cells
o-mock-28dpi-101	ob
o-mock-28dpi-102	ob
o-mock-28dpi-103	ob
o-mock-28dpi-104	focal accumulation of vacoulated hepatocytes
o-mock-28dpi-105	ob
o-mock-28dpi-106	ob
o-mock-28dpi-107	ob
o-mock-28dpi-108	ob
o-SARS-28dpi-109	ob
o-SARS-28dpi-110	ob
o-SARS-28dpi-111	???
o-SARS-28dpi-112	ob
o-SARS-28dpi-113	ob
o-SARS-28dpi-114	ob
o-SARS-28dpi-115	ob
o-SARS-28dpi-116	mild, periportal and randomly distributed, lymphohistiocytic Hepatitis
o-mock-56dpi-77	ob
o-mock-56dpi-78	ob
o-mock-56dpi-79	ob
o-mock-56dpi-80	ob
o-mock-56dpi-81	ob
o-mock-56dpi-82	ob
o-mock-56dpi-83	ob
o-mock-56dpi-84	ob
o-SARS-56dpi-85	ob
o-SARS-56dpi-86	ob
o-SARS-56dpi-87	ob
o-SARS-56dpi-88	ob
o-SARS-56dpi-89
o-SARS-56dpi-90	ob
o-SARS-56dpi-91	ob
o-SARS-56dpi-92	ob
o-mock-112dpi-5	ob
o-mock-112dpi-6	mild, randomly distributed, lymphohistiocytic Hepatitis
o-mock-112dpi-7	ob
o-mock-112dpi-8	ob
o-mock-112dpi-9	ob
o-mock-112dpi-10	ob
o-mock-112dpi-11	mild, periportal, lymphohistiocytic Hepatitis; focal accumulation of vacoulated hepatocytes
o-mock-112dpi-12	focal liver cyst
o-SARS-112dpi-13	ob
o-SARS-112dpi-14	ob
o-SARS-112dpi-15	ob
o-SARS-112dpi-16	ob
o-SARS-112dpi-17	single lymphocytes and macrophages wihin portal areas
o-SARS-112dpi-18	ob
o-SARS-112dpi-19	mild, periportal, lymphohistiocytic Hepatitis
o-SARS-112dpi-20	ob
